# Supplementary material for: An over-land aerosol optical depth data set for data assimilation by filtering, correction, and aggregation of MODIS Collection 5 optical depth retrievals
Source: Copernicus journal article supplement (doi:10.5194/amt-4-379-2011), 2011-03-01
Supplement: Supplementary file 1 [file l3_region_stats.xls]

## Sheet: gridstats_global_regional_0b
															RMSE Error Model
				Count						Compliance						Diagnostic		Prognostic		MCV
Region	Scenario	Satellite	QA	<0.2	0.2-0.6	0.6-1.4	>1.4	Slope	R2	<0.2	0.2-0.6	0.6-1.4	>1.4	All	Floor	0.2-1.4	>1.4	0.2-1.4	>1.4	Median	%>1.0	%>2.0	RMSE_HIGH	RMSE_HIGH	RMSE_HIGH
-1	raw_nobuddy	Terra	All	44724	24012	4164	534	0.96	0.51	12/ 75/ 12	08/ 52/ 39	09/ 51/ 39	06/ 46/ 47	10/ 66/ 23	0.11	0.03 + 0.23*tau	-0.13 + 0.36*tau	0.04 + 0.24*tau	-0.33 + 0.43*tau	0.31	0.09	0.03	0.697	0.52	0.566
-1	raw_nosdcheck	Terra	All	44497	23436	4056	529	0.96	0.52	12/ 75/ 12	08/ 53/ 38	09/ 52/ 38	06/ 46/ 47	10/ 66/ 22	0.1	0.03 + 0.23*tau	-0.04 + 0.31*tau	0.04 + 0.24*tau	-0.28 + 0.41*tau	0.31	0.09	0.03	0.696	0.511	0.554
-1	raw	Terra	All	42272	21989	3764	500	0.95	0.53	11/ 76/ 12	08/ 54/ 36	09/ 53/ 36	06/ 47/ 46	10/ 68/ 21	0.1	0.03 + 0.24*tau	-0.10 + 0.33*tau	0.04 + 0.23*tau	-0.21 + 0.37*tau	0.32	0.08	0.01	0.667	0.495	0.53
-1	raw_fqa	Terra	All	31408	11508	2160	301	0.93	0.58	13/ 79/ 07	10/ 64/ 25	09/ 59/ 31	09/ 46/ 43	12/ 74/ 13	0.08	0.02 + 0.23*tau	-0.11 + 0.32*tau	0.03 + 0.21*tau	-0.20 + 0.36*tau	0.29	0.1	0.02	0.656	0.445	0.503
-1	raw_fqa_nocloud	Terra	All	29623	10093	1952	275	0.92	0.59	15/ 78/ 06	10/ 66/ 22	10/ 59/ 29	09/ 46/ 44	13/ 74/ 11	0.07	0.02 + 0.24*tau	-0.20 + 0.37*tau	0.03 + 0.21*tau	-0.31 + 0.42*tau	0.29	0.1	0.03	0.673	0.443	0.52
-1	nocorr_fmatchedweak	Terra	All	29693	10738	1948	270	0.92	0.59	14/ 79/ 06	11/ 65/ 23	10/ 60/ 29	08/ 48/ 42	13/ 74/ 12	0.07	0.02 + 0.24*tau	-0.14 + 0.34*tau	0.03 + 0.21*tau	-0.34 + 0.43*tau	0.29	0.1	0.02	0.667	0.441	0.512
-1	nocorr_fmatchedweak_nocloud	Terra	All	28033	9400	1745	249	0.91	0.6	15/ 78/ 05	11/ 67/ 20	10/ 60/ 28	08/ 47/ 43	14/ 75/ 10	0.07	0.02 + 0.24*tau	-0.17 + 0.36*tau	0.03 + 0.21*tau	-0.42 + 0.47*tau	0.29	0.11	0.03	0.696	0.442	0.529
-1	nocorr_fmatchedstrong	Terra	All	23149	6619	994	134	0.86	0.6	17/ 79/ 03	13/ 71/ 15	13/ 64/ 21	14/ 47/ 37	16/ 77/ 06	0.06	0.01 + 0.26*tau	-0.13 + 0.34*tau	0.03 + 0.21*tau	-0.28 + 0.38*tau	0.29	0.12	0.04	0.647	0.441	0.492
-1	nocorr_fmatchedstrong_noclo	Terra	All	21475	5600	860	117	0.85	0.61	19/ 78/ 02	14/ 73/ 11	14/ 66/ 19	15/ 48/ 35	17/ 77/ 05	0.06	0.01 + 0.26*tau	-0.26 + 0.42*tau	0.02 + 0.21*tau	-0.84 + 0.69*tau	0.3	0.12	0.04	0.669	0.447	0.588
-1	nocorr_fclimweak	Terra	All	29418	10346	1813	256	0.91	0.59	14/ 79/ 05	11/ 66/ 22	10/ 62/ 27	09/ 47/ 42	13/ 75/ 11	0.07	0.02 + 0.24*tau	-0.25 + 0.39*tau	0.03 + 0.20*tau	-0.40 + 0.46*tau	0.29	0.1	0.03	0.634	0.427	0.503
-1	nocorr_fclimweak_nocloud	Terra	All	27608	8987	1613	227	0.9	0.6	15/ 79/ 05	11/ 68/ 19	11/ 63/ 25	07/ 47/ 44	14/ 75/ 09	0.07	0.02 + 0.24*tau	-0.26 + 0.39*tau	0.03 + 0.19*tau	-0.34 + 0.42*tau	0.29	0.11	0.03	0.655	0.414	0.5
-1	nocorr_fclimstrong	Terra	All	20216	5340	705	91	0.87	0.58	19/ 78/ 02	12/ 73/ 14	14/ 63/ 21	10/ 53/ 35	17/ 76/ 05	0.06	0.01 + 0.27*tau	0.03 + 0.24*tau	0.02 + 0.21*tau	-0.95 + 0.74*tau	0.3	0.12	0.05	0.698	0.432	0.585
-1	nocorr_fclimstrong_nocloud	Terra	All	18558	4478	603	79	0.85	0.6	20/ 77/ 01	14/ 75/ 10	15/ 66/ 18	10/ 51/ 37	19/ 76/ 04	0.06	0.01 + 0.27*tau	-0.18 + 0.36*tau	0.03 + 0.20*tau	-0.49 + 0.48*tau	0.3	0.14	0.05	0.73	0.427	0.527
-1	albcorr_fmatchedweak	Terra	All	29439	11070	1948	270	0.92	0.6	09/ 83/ 07	10/ 67/ 22	10/ 60/ 29	08/ 48/ 42	09/ 77/ 12	0.07	0.01 + 0.25*tau	-0.19 + 0.36*tau	0.03 + 0.22*tau	-0.37 + 0.44*tau	0.26	0.06	0.03	0.667	0.448	0.516
-1	albcorr_fmatchedweak_noclou	Terra	All	27887	9637	1748	249	0.91	0.61	10/ 83/ 06	10/ 70/ 19	10/ 60/ 28	08/ 47/ 43	10/ 79/ 10	0.06	0.01 + 0.25*tau	-0.09 + 0.31*tau	0.02 + 0.22*tau	-0.37 + 0.45*tau	0.26	0.07	0.03	0.696	0.447	0.527
-1	albcorr_fmatchedstrong	Terra	All	21955	7886	1000	134	0.89	0.62	08/ 85/ 06	09/ 71/ 19	13/ 65/ 21	14/ 47/ 37	08/ 81/ 09	0.06	0.00 + 0.26*tau	-0.17 + 0.36*tau	0.02 + 0.21*tau	-0.32 + 0.40*tau	0.23	0.02	0	0.647	0.449	0.501
-1	albcorr_fmatchedstrong_nocl	Terra	All	20482	6656	867	117	0.87	0.63	08/ 86/ 04	10/ 74/ 15	14/ 66/ 19	15/ 48/ 35	09/ 82/ 07	0.05	-0.00 + 0.27*tau	-0.26 + 0.43*tau	0.02 + 0.22*tau	-0.84 + 0.69*tau	0.23	0.02	0	0.669	0.459	0.592
-1	albcorr_fclimweak	Terra	All	28358	11452	1873	252	0.93	0.61	07/ 83/ 08	09/ 67/ 23	09/ 62/ 28	09/ 48/ 42	08/ 78/ 13	0.07	0.01 + 0.24*tau	-0.26 + 0.40*tau	0.03 + 0.21*tau	-0.32 + 0.41*tau	0.24	0.04	0.01	0.644	0.429	0.501
-1	albcorr_fclimweak_nocloud	Terra	All	26789	9877	1645	225	0.92	0.63	08/ 84/ 06	09/ 70/ 19	10/ 63/ 26	08/ 46/ 44	08/ 79/ 11	0.06	0.01 + 0.24*tau	-0.18 + 0.35*tau	0.03 + 0.20*tau	-0.36 + 0.43*tau	0.24	0.04	0.02	0.663	0.421	0.504
-1	albcorr_fclimstrong	Terra	All	18801	6722	795	94	0.92	0.6	07/ 86/ 06	08/ 71/ 20	11/ 61/ 26	10/ 54/ 35	07/ 81/ 10	0.06	0.00 + 0.26*tau	0.05 + 0.23*tau	0.02 + 0.21*tau	-0.98 + 0.75*tau	0.21	0.01	0	0.7	0.444	0.591
-1	albcorr_fclimstrong_nocloud	Terra	All	17346	5655	681	84	0.9	0.62	07/ 87/ 05	09/ 74/ 15	12/ 64/ 23	10/ 51/ 38	08/ 83/ 08	0.05	-0.00 + 0.27*tau	-0.13 + 0.33*tau	0.02 + 0.21*tau	-0.36 + 0.42*tau	0.21	0.01	0	0.723	0.438	0.518
-1	corr1_fclimweak	Terra	All	28789	11064	1910	205	0.92	0.63	07/ 83/ 08	09/ 69/ 21	10/ 62/ 27	15/ 50/ 33	08/ 78/ 12	0.06	0.01 + 0.23*tau	-0.37 + 0.45*tau	0.03 + 0.20*tau	-0.20 + 0.35*tau	0.24	0.04	0.01	0.602	0.404	0.472
-1	corr1_fclimweak_nocloud	Terra	All	27124	9569	1690	181	0.91	0.64	08/ 84/ 07	10/ 71/ 17	11/ 63/ 25	15/ 49/ 34	09/ 80/ 10	0.06	0.01 + 0.23*tau	-0.36 + 0.45*tau	0.03 + 0.19*tau	-0.27 + 0.39*tau	0.23	0.04	0.02	0.629	0.395	0.486
-1	corr1_fclimstrong	Terra	All	19035	6542	767	81	0.91	0.61	07/ 86/ 06	08/ 73/ 17	12/ 63/ 23	16/ 61/ 22	07/ 82/ 09	0.05	0.00 + 0.26*tau	-0.29 + 0.41*tau	0.01 + 0.22*tau	-0.64 + 0.58*tau	0.21	0.01	0	0.601	0.418	0.491
-1	corr1_fclimstrong_nocloud	Terra	All	17537	5506	665	72	0.89	0.63	07/ 87/ 05	09/ 76/ 14	13/ 66/ 20	16/ 58/ 25	08/ 83/ 07	0.05	-0.00 + 0.27*tau	-0.52 + 0.53*tau	0.01 + 0.21*tau	-0.49 + 0.51*tau	0.21	0.01	0	0.624	0.409	0.488
-1	corr2_fmatchedweak	Terra	All	29805	10762	1974	222	0.91	0.61	09/ 83/ 07	10/ 69/ 19	10/ 59/ 29	14/ 54/ 31	10/ 78/ 11	0.06	0.02 + 0.24*tau	-0.36 + 0.45*tau	0.03 + 0.21*tau	-0.13 + 0.32*tau	0.26	0.06	0.03	0.626	0.425	0.472
-1	corr2_fmatchedweak_nocloud	Terra	All	28181	9382	1787	201	0.9	0.62	10/ 83/ 06	11/ 71/ 17	11/ 60/ 27	14/ 51/ 33	10/ 79/ 09	0.06	0.01 + 0.24*tau	-0.31 + 0.42*tau	0.02 + 0.21*tau	-0.21 + 0.37*tau	0.26	0.07	0.03	0.655	0.428	0.49
-1	corr2_fmatchedstrong	Terra	All	22201	7674	1012	106	0.87	0.63	08/ 85/ 06	10/ 72/ 16	13/ 65/ 20	20/ 51/ 27	09/ 81/ 09	0.05	0.00 + 0.25*tau	-0.58 + 0.58*tau	0.02 + 0.21*tau	-0.46 + 0.49*tau	0.23	0.02	0	0.622	0.426	0.494
-1	corr2_fmatchedstrong_noclou	Terra	All	20687	6484	883	92	0.85	0.64	08/ 86/ 04	11/ 75/ 13	14/ 68/ 17	20/ 52/ 27	09/ 82/ 07	0.05	0.00 + 0.26*tau	-0.32 + 0.45*tau	0.02 + 0.22*tau	-0.18 + 0.35*tau	0.22	0.02	0	0.632	0.433	0.481
-1	raw_nobuddy	Aqua	All	39788	24723	4323	480	0.99	0.51	10/ 76/ 13	06/ 48/ 44	08/ 47/ 44	05/ 41/ 53	08/ 64/ 26	0.11	0.03 + 0.24*tau	0.03 + 0.26*tau	0.04 + 0.26*tau	-0.14 + 0.34*tau	0.31	0.08	0.03	0.664	0.544	0.556
-1	raw_nosdcheck	Aqua	All	39480	23994	4196	477	0.99	0.51	10/ 76/ 13	07/ 48/ 43	08/ 48/ 43	05/ 41/ 53	09/ 64/ 26	0.11	0.03 + 0.24*tau	0.11 + 0.21*tau	0.04 + 0.25*tau	-0.13 + 0.34*tau	0.31	0.08	0.03	0.664	0.537	0.552
-1	raw	Aqua	All	37454	22340	3853	444	0.98	0.52	09/ 77/ 12	07/ 50/ 42	08/ 49/ 42	04/ 43/ 51	08/ 66/ 25	0.11	0.03 + 0.24*tau	0.17 + 0.18*tau	0.04 + 0.25*tau	-0.12 + 0.32*tau	0.31	0.07	0.02	0.645	0.523	0.535
-1	raw_fqa	Aqua	All	26388	10588	1901	244	0.95	0.57	12/ 80/ 07	08/ 62/ 29	09/ 55/ 35	05/ 49/ 45	11/ 74/ 14	0.08	0.02 + 0.25*tau	-0.03 + 0.26*tau	0.03 + 0.23*tau	-0.26 + 0.39*tau	0.28	0.08	0.03	0.635	0.467	0.507
-1	raw_fqa_nocloud	Aqua	All	24537	9112	1678	212	0.94	0.58	13/ 80/ 06	09/ 64/ 26	09/ 56/ 34	05/ 50/ 44	12/ 74/ 12	0.07	0.02 + 0.25*tau	-0.12 + 0.30*tau	0.03 + 0.22*tau	-0.15 + 0.33*tau	0.28	0.09	0.03	0.633	0.456	0.485
-1	nocorr_fmatchedweak	Aqua	All	25040	9974	1679	216	0.94	0.58	12/ 80/ 06	09/ 63/ 27	10/ 56/ 32	04/ 50/ 44	11/ 74/ 13	0.07	0.01 + 0.26*tau	-0.16 + 0.33*tau	0.03 + 0.22*tau	-0.19 + 0.35*tau	0.28	0.08	0.03	0.628	0.449	0.485
-1	nocorr_fmatchedweak_nocloud	Aqua	All	23266	8587	1468	187	0.93	0.59	13/ 80/ 05	10/ 65/ 24	10/ 57/ 32	05/ 51/ 43	12/ 75/ 11	0.07	0.01 + 0.26*tau	-0.16 + 0.32*tau	0.03 + 0.22*tau	-0.17 + 0.33*tau	0.28	0.09	0.03	0.623	0.445	0.475
-1	nocorr_fmatchedstrong	Aqua	All	19553	6065	820	97	0.89	0.59	15/ 81/ 03	11/ 71/ 17	13/ 61/ 24	06/ 55/ 38	14/ 78/ 07	0.06	0.01 + 0.27*tau	-0.15 + 0.37*tau	0.02 + 0.21*tau	-0.58 + 0.54*tau	0.29	0.1	0.04	0.679	0.438	0.533
-1	nocorr_fmatchedstrong_noclo	Aqua	All	17902	5025	682	80	0.87	0.61	16/ 81/ 02	12/ 74/ 13	13/ 64/ 22	07/ 58/ 33	15/ 79/ 05	0.06	0.01 + 0.26*tau	0.01 + 0.27*tau	0.02 + 0.20*tau	-0.55 + 0.51*tau	0.29	0.11	0.04	0.661	0.433	0.518
-1	nocorr_fclimweak	Aqua	All	24912	9511	1522	200	0.93	0.58	12/ 81/ 06	09/ 64/ 25	10/ 58/ 30	04/ 50/ 46	11/ 75/ 12	0.07	0.01 + 0.26*tau	-0.22 + 0.37*tau	0.03 + 0.22*tau	-0.33 + 0.42*tau	0.28	0.08	0.03	0.622	0.439	0.488
-1	nocorr_fclimweak_nocloud	Aqua	All	23035	8119	1332	170	0.92	0.6	14/ 80/ 05	10/ 66/ 22	10/ 58/ 30	04/ 54/ 41	13/ 76/ 10	0.07	0.01 + 0.26*tau	-0.14 + 0.30*tau	0.03 + 0.21*tau	-0.30 + 0.39*tau	0.27	0.09	0.03	0.61	0.424	0.467
-1	nocorr_fclimstrong	Aqua	All	17129	4730	570	54	0.89	0.58	16/ 80/ 02	11/ 73/ 15	12/ 61/ 25	07/ 50/ 42	15/ 78/ 06	0.06	0.01 + 0.27*tau	-0.14 + 0.36*tau	0.02 + 0.21*tau	-0.35 + 0.42*tau	0.29	0.11	0.04	0.643	0.44	0.497
-1	nocorr_fclimstrong_nocloud	Aqua	All	15473	3866	447	48	0.87	0.62	18/ 80/ 01	12/ 76/ 11	13/ 63/ 22	08/ 50/ 41	16/ 78/ 04	0.06	0.01 + 0.27*tau	-0.19 + 0.36*tau	0.02 + 0.20*tau	-0.42 + 0.44*tau	0.29	0.12	0.05	0.662	0.43	0.499
-1	albcorr_fmatchedweak	Aqua	All	24609	10434	1691	216	0.94	0.59	08/ 84/ 07	08/ 64/ 26	10/ 56/ 32	04/ 50/ 44	08/ 77/ 14	0.07	0.01 + 0.26*tau	-0.15 + 0.32*tau	0.03 + 0.22*tau	-0.18 + 0.34*tau	0.25	0.04	0.02	0.628	0.454	0.485
-1	albcorr_fmatchedweak_noclou	Aqua	All	23013	8894	1473	187	0.93	0.6	09/ 84/ 06	09/ 67/ 22	10/ 57/ 32	05/ 51/ 43	09/ 78/ 11	0.06	0.01 + 0.26*tau	-0.21 + 0.35*tau	0.02 + 0.22*tau	-0.16 + 0.32*tau	0.25	0.05	0.02	0.623	0.451	0.477
-1	albcorr_fmatchedstrong	Aqua	All	18349	7314	836	97	0.91	0.61	06/ 86/ 06	08/ 69/ 22	13/ 61/ 25	06/ 55/ 38	07/ 81/ 11	0.06	-0.00 + 0.26*tau	-0.10 + 0.35*tau	0.02 + 0.21*tau	-0.62 + 0.55*tau	0.23	0.02	0	0.679	0.443	0.54
-1	albcorr_fmatchedstrong_nocl	Aqua	All	16933	6042	689	80	0.9	0.63	07/ 87/ 04	09/ 72/ 17	13/ 64/ 22	07/ 58/ 33	08/ 83/ 08	0.05	-0.00 + 0.26*tau	-0.26 + 0.42*tau	0.02 + 0.21*tau	-0.53 + 0.50*tau	0.22	0.02	0.01	0.661	0.441	0.525
-1	albcorr_fclimweak	Aqua	All	23857	10555	1619	195	0.95	0.61	06/ 84/ 08	07/ 64/ 27	10/ 56/ 32	04/ 51/ 43	07/ 77/ 15	0.07	0.01 + 0.26*tau	-0.16 + 0.33*tau	0.03 + 0.22*tau	-0.36 + 0.43*tau	0.23	0.02	0.01	0.631	0.439	0.495
-1	albcorr_fclimweak_nocloud	Aqua	All	22232	8944	1407	164	0.94	0.62	07/ 85/ 07	08/ 68/ 23	10/ 59/ 30	04/ 54/ 40	08/ 79/ 12	0.06	0.00 + 0.26*tau	-0.12 + 0.29*tau	0.02 + 0.21*tau	-0.27 + 0.38*tau	0.23	0.03	0.01	0.622	0.427	0.47
-1	albcorr_fclimstrong	Aqua	All	15798	6026	650	58	0.94	0.6	06/ 87/ 06	07/ 69/ 23	10/ 58/ 31	06/ 48/ 44	06/ 81/ 11	0.06	0.00 + 0.26*tau	-0.37 + 0.49*tau	0.02 + 0.22*tau	0.05 + 0.21*tau	0.21	0.01	0	0.641	0.451	0.452
-1	albcorr_fclimstrong_nocloud	Aqua	All	14413	4922	513	53	0.93	0.63	06/ 88/ 05	08/ 73/ 18	12/ 61/ 26	07/ 50/ 41	07/ 83/ 09	0.05	-0.00 + 0.27*tau	0.07 + 0.20*tau	0.02 + 0.21*tau	-0.39 + 0.44*tau	0.21	0.01	0	0.649	0.432	0.505
-1	corr1_fclimweak	Aqua	All	24463	10224	1476	125	0.9	0.61	07/ 84/ 08	10/ 66/ 23	13/ 59/ 27	08/ 58/ 32	08/ 77/ 13	0.06	0.00 + 0.27*tau	-0.16 + 0.35*tau	0.03 + 0.21*tau	-0.00 + 0.24*tau	0.23	0.02	0.01	0.59	0.425	0.44
-1	corr1_fclimweak_nocloud	Aqua	All	22754	8662	1277	107	0.89	0.62	07/ 84/ 07	11/ 69/ 19	13/ 62/ 24	13/ 57/ 29	08/ 79/ 11	0.06	-0.00 + 0.27*tau	-0.06 + 0.28*tau	0.03 + 0.21*tau	0.20 + 0.13*tau	0.22	0.03	0.01	0.602	0.41	0.44
-1	corr1_fclimstrong	Aqua	All	16119	5828	574	36	0.9	0.59	06/ 87/ 06	09/ 70/ 19	11/ 61/ 27	16/ 61/ 22	07/ 82/ 10	0.05	-0.01 + 0.29*tau	-0.37 + 0.47*tau	0.02 + 0.21*tau	-0.29 + 0.42*tau	0.21	0.01	0	0.694	0.425	0.497
-1	corr1_fclimstrong_nocloud	Aqua	All	14672	4767	446	35	0.89	0.62	06/ 88/ 05	10/ 73/ 15	13/ 65/ 21	17/ 62/ 20	07/ 84/ 07	0.05	-0.01 + 0.29*tau	-0.20 + 0.37*tau	0.02 + 0.21*tau	-1.00 + 0.77*tau	0.2	0.01	0	0.691	0.407	0.521
-1	corr2_fmatchedweak	Aqua	All	25199	10110	1572	141	0.9	0.59	08/ 83/ 07	11/ 65/ 22	12/ 57/ 29	14/ 56/ 29	09/ 77/ 12	0.06	0.00 + 0.27*tau	-0.49 + 0.52*tau	0.03 + 0.22*tau	0.34 + 0.06*tau	0.24	0.04	0.02	0.616	0.434	0.477
-1	corr2_fmatchedweak_nocloud	Aqua	All	23508	8610	1383	120	0.88	0.6	09/ 84/ 06	12/ 68/ 19	13/ 58/ 27	15/ 55/ 28	10/ 79/ 10	0.06	0.00 + 0.28*tau	-0.13 + 0.31*tau	0.03 + 0.22*tau	0.23 + 0.11*tau	0.24	0.05	0.02	0.594	0.441	0.461
-1	corr2_fmatchedstrong	Aqua	All	18719	7116	750	56	0.87	0.61	07/ 86/ 06	10/ 69/ 19	15/ 62/ 21	19/ 57/ 23	08/ 81/ 10	0.05	-0.01 + 0.29*tau	-0.31 + 0.46*tau	0.02 + 0.22*tau	0.01 + 0.25*tau	0.22	0.02	0	0.72	0.441	0.493
-1	corr2_fmatchedstrong_noclou	Aqua	All	17242	5880	603	56	0.85	0.62	07/ 87/ 04	11/ 73/ 15	16/ 65/ 18	19/ 64/ 16	08/ 83/ 07	0.05	-0.01 + 0.29*tau	-0.15 + 0.35*tau	0.02 + 0.22*tau	-0.01 + 0.26*tau	0.22	0.02	0.01	0.667	0.418	0.468
0	raw_nobuddy	Terra	All	770	178	0	0	7.45	0.03	00/ 22/ 76	00/ 00/100	00/ 00/ 00	00/ 00/ 00	00/ 18/ 81	0.15	****** + *******tau	****** + *******tau	-0.01 + 0.96*tau	****** + *******tau	0.48	0.08	0.02	-999	-999	-999
0	raw_nosdcheck	Terra	All	757	164	0	0	7.6	0	00/ 22/ 76	00/ 00/100	00/ 00/ 00	00/ 00/ 00	00/ 18/ 80	0.14	****** + *******tau	****** + *******tau	-0.02 + 0.99*tau	****** + *******tau	0.47	0.08	0.02	-999	-999	-999
0	raw	Terra	All	683	142	0	0	7.54	0	00/ 20/ 79	00/ 00/100	00/ 00/ 00	00/ 00/ 00	00/ 17/ 82	0.14	****** + *******tau	****** + *******tau	-0.02 + 0.99*tau	****** + *******tau	0.5	0.09	0.01	-999	-999	-999
0	raw_fqa	Terra	All	362	8	0	0	6.84	0.3	00/ 40/ 59	00/ 00/100	00/ 00/ 00	00/ 00/ 00	00/ 39/ 60	0.08	****** + *******tau	****** + *******tau	****** + *******tau	****** + *******tau	0.5	0.14	0.01	-999	-999	-999
0	raw_fqa_nocloud	Terra	All	327	3	0	0	6.13	0.8	00/ 44/ 55	00/ 00/100	00/ 00/ 00	00/ 00/ 00	00/ 44/ 55	0.08	****** + *******tau	****** + *******tau	****** + *******tau	****** + *******tau	0.53	0.19	0.02	-999	-999	-999
0	nocorr_fmatchedweak	Terra	All	362	8	0	0	6.84	0.3	00/ 40/ 59	00/ 00/100	00/ 00/ 00	00/ 00/ 00	00/ 39/ 60	0.08	****** + *******tau	****** + *******tau	****** + *******tau	****** + *******tau	0.5	0.14	0.01	-999	-999	-999
0	nocorr_fmatchedweak_nocloud	Terra	All	327	3	0	0	6.13	0.8	00/ 44/ 55	00/ 00/100	00/ 00/ 00	00/ 00/ 00	00/ 44/ 55	0.08	****** + *******tau	****** + *******tau	****** + *******tau	****** + *******tau	0.53	0.19	0.02	-999	-999	-999
0	nocorr_fmatchedstrong	Terra	All	296	3	0	0	16.36	0	00/ 40/ 59	00/ 00/100	00/ 00/ 00	00/ 00/ 00	00/ 40/ 59	0.08	****** + *******tau	****** + *******tau	****** + *******tau	****** + *******tau	0.45	0.08	0.01	-999	-999	-999
0	nocorr_fmatchedstrong_noclo	Terra	All	259	2	0	0	-999	-999	00/ 44/ 54	00/ 00/100	00/ 00/ 00	00/ 00/ 00	00/ 44/ 55	0.07	****** + *******tau	****** + *******tau	****** + *******tau	****** + *******tau	0.48	0.12	0.01	-999	-999	-999
0	nocorr_fclimweak	Terra	All	323	6	0	0	10.65	0.13	00/ 41/ 58	00/ 00/100	00/ 00/ 00	00/ 00/ 00	00/ 40/ 59	0.08	****** + *******tau	****** + *******tau	****** + *******tau	****** + *******tau	0.47	0.11	0.01	-999	-999	-999
0	nocorr_fclimweak_nocloud	Terra	All	292	3	0	0	13.11	0.93	00/ 45/ 54	00/ 00/100	00/ 00/ 00	00/ 00/ 00	00/ 44/ 55	0.07	****** + *******tau	****** + *******tau	****** + *******tau	****** + *******tau	0.52	0.13	0.01	-999	-999	-999
0	nocorr_fclimstrong	Terra	All	229	2	0	0	-999	-999	00/ 44/ 55	00/ 00/100	00/ 00/ 00	00/ 00/ 00	00/ 44/ 55	0.08	****** + *******tau	****** + *******tau	****** + *******tau	****** + *******tau	0.44	0.04	0	-999	-999	-999
0	nocorr_fclimstrong_nocloud	Terra	All	200	1	0	0	-999	-999	00/ 49/ 50	00/ 00/100	00/ 00/ 00	00/ 00/ 00	00/ 49/ 50	0.07	****** + *******tau	****** + *******tau	****** + *******tau	****** + *******tau	0.48	0.06	0.01	-999	-999	-999
0	albcorr_fmatchedweak	Terra	All	356	15	0	0	7.54	0.05	00/ 19/ 80	00/ 00/100	00/ 00/ 00	00/ 00/ 00	00/ 18/ 81	0.1	****** + *******tau	****** + *******tau	****** + *******tau	****** + *******tau	0.41	0.04	0.01	-999	-999	-999
0	albcorr_fmatchedweak_noclou	Terra	All	322	9	0	0	7.8	0.04	00/ 22/ 77	00/ 00/100	00/ 00/ 00	00/ 00/ 00	00/ 21/ 78	0.09	****** + *******tau	****** + *******tau	****** + *******tau	****** + *******tau	0.42	0.06	0.01	-999	-999	-999
0	albcorr_fmatchedstrong	Terra	All	292	6	0	0	12.61	0	00/ 13/ 86	00/ 00/100	00/ 00/ 00	00/ 00/ 00	00/ 12/ 87	0.1	****** + *******tau	****** + *******tau	****** + *******tau	****** + *******tau	0.35	0	0	-999	-999	-999
0	albcorr_fmatchedstrong_nocl	Terra	All	257	3	0	0	14.48	0.99	00/ 14/ 85	00/ 00/100	00/ 00/ 00	00/ 00/ 00	00/ 14/ 85	0.1	****** + *******tau	****** + *******tau	****** + *******tau	****** + *******tau	0.37	0	0	-999	-999	-999
0	albcorr_fclimweak	Terra	All	316	14	0	0	7.7	0.04	00/ 12/ 87	00/ 00/100	00/ 00/ 00	00/ 00/ 00	00/ 11/ 88	0.11	****** + *******tau	****** + *******tau	****** + *******tau	****** + *******tau	0.35	0.01	0	-999	-999	-999
0	albcorr_fclimweak_nocloud	Terra	All	290	6	0	0	12.91	0.18	00/ 15/ 84	00/ 00/100	00/ 00/ 00	00/ 00/ 00	00/ 15/ 84	0.1	****** + *******tau	****** + *******tau	****** + *******tau	****** + *******tau	0.36	0.01	0	-999	-999	-999
0	albcorr_fclimstrong	Terra	All	224	6	0	0	8.51	0.08	00/ 04/ 95	00/ 00/100	00/ 00/ 00	00/ 00/ 00	00/ 04/ 95	0.11	****** + *******tau	****** + *******tau	****** + *******tau	****** + *******tau	0.29	0	0	-999	-999	-999
0	albcorr_fclimstrong_nocloud	Terra	All	197	3	0	0	7.9	0.01	00/ 05/ 94	00/ 00/100	00/ 00/ 00	00/ 00/ 00	00/ 05/ 94	0.1	****** + *******tau	****** + *******tau	****** + *******tau	****** + *******tau	0.32	0	0	-999	-999	-999
0	corr1_fclimweak	Terra	All	316	14	0	0	7.7	0.04	00/ 12/ 87	00/ 00/100	00/ 00/ 00	00/ 00/ 00	00/ 11/ 88	0.11	****** + *******tau	****** + *******tau	****** + *******tau	****** + *******tau	0.35	0.01	0	-999	-999	-999
0	corr1_fclimweak_nocloud	Terra	All	290	6	0	0	12.91	0.18	00/ 15/ 84	00/ 00/100	00/ 00/ 00	00/ 00/ 00	00/ 15/ 84	0.1	****** + *******tau	****** + *******tau	****** + *******tau	****** + *******tau	0.36	0.01	0	-999	-999	-999
0	corr1_fclimstrong	Terra	All	224	6	0	0	8.51	0.08	00/ 04/ 95	00/ 00/100	00/ 00/ 00	00/ 00/ 00	00/ 04/ 95	0.11	****** + *******tau	****** + *******tau	****** + *******tau	****** + *******tau	0.29	0	0	-999	-999	-999
0	corr1_fclimstrong_nocloud	Terra	All	197	3	0	0	7.9	0.01	00/ 05/ 94	00/ 00/100	00/ 00/ 00	00/ 00/ 00	00/ 05/ 94	0.1	****** + *******tau	****** + *******tau	****** + *******tau	****** + *******tau	0.32	0	0	-999	-999	-999
0	corr2_fmatchedweak	Terra	All	356	15	0	0	7.54	0.05	00/ 19/ 80	00/ 00/100	00/ 00/ 00	00/ 00/ 00	00/ 18/ 81	0.1	****** + *******tau	****** + *******tau	****** + *******tau	****** + *******tau	0.41	0.04	0.01	-999	-999	-999
0	corr2_fmatchedweak_nocloud	Terra	All	322	9	0	0	7.8	0.04	00/ 22/ 77	00/ 00/100	00/ 00/ 00	00/ 00/ 00	00/ 21/ 78	0.09	****** + *******tau	****** + *******tau	****** + *******tau	****** + *******tau	0.42	0.06	0.01	-999	-999	-999
0	corr2_fmatchedstrong	Terra	All	292	6	0	0	12.61	0	00/ 13/ 86	00/ 00/100	00/ 00/ 00	00/ 00/ 00	00/ 12/ 87	0.1	****** + *******tau	****** + *******tau	****** + *******tau	****** + *******tau	0.35	0	0	-999	-999	-999
0	corr2_fmatchedstrong_noclou	Terra	All	257	3	0	0	14.48	0.99	00/ 14/ 85	00/ 00/100	00/ 00/ 00	00/ 00/ 00	00/ 14/ 85	0.1	****** + *******tau	****** + *******tau	****** + *******tau	****** + *******tau	0.37	0	0	-999	-999	-999
0	raw_nobuddy	Aqua	All	455	247	3	0	9.6	0.1	01/ 21/ 76	00/ 00/100	00/ 00/100	00/ 00/ 00	01/ 13/ 85	0.19	****** + *******tau	****** + *******tau	-0.00 + 0.95*tau	****** + *******tau	0.36	0.08	0.02	-999	-999	-999
0	raw_nosdcheck	Aqua	All	454	222	3	0	9.3	0.1	01/ 20/ 77	00/ 00/100	00/ 00/100	00/ 00/ 00	01/ 13/ 85	0.18	****** + *******tau	****** + *******tau	-0.01 + 0.95*tau	****** + *******tau	0.35	0.07	0.02	-999	-999	-999
0	raw	Aqua	All	397	189	3	0	10.83	0.21	01/ 17/ 81	00/ 00/100	00/ 00/100	00/ 00/ 00	00/ 11/ 87	0.18	****** + *******tau	****** + *******tau	-0.00 + 0.94*tau	****** + *******tau	0.39	0.08	0.02	-999	-999	-999
0	raw_fqa	Aqua	All	185	16	0	0	7.69	0.11	00/ 29/ 70	00/ 00/100	00/ 00/ 00	00/ 00/ 00	00/ 26/ 72	0.11	****** + *******tau	****** + *******tau	****** + *******tau	****** + *******tau	0.45	0.06	0	-999	-999	-999
0	raw_fqa_nocloud	Aqua	All	157	7	0	0	8.46	0.2	00/ 34/ 64	00/ 00/100	00/ 00/ 00	00/ 00/ 00	00/ 32/ 66	0.09	****** + *******tau	****** + *******tau	****** + *******tau	****** + *******tau	0.46	0.11	0.04	-999	-999	-999
0	nocorr_fmatchedweak	Aqua	All	185	16	0	0	7.68	0.11	00/ 29/ 70	00/ 00/100	00/ 00/ 00	00/ 00/ 00	00/ 26/ 72	0.11	****** + *******tau	****** + *******tau	****** + *******tau	****** + *******tau	0.45	0.06	0	-999	-999	-999
0	nocorr_fmatchedweak_nocloud	Aqua	All	157	7	0	0	8.46	0.2	00/ 34/ 64	00/ 00/100	00/ 00/ 00	00/ 00/ 00	00/ 32/ 66	0.09	****** + *******tau	****** + *******tau	****** + *******tau	****** + *******tau	0.46	0.11	0.04	-999	-999	-999
0	nocorr_fmatchedstrong	Aqua	All	134	8	0	0	7.81	0.14	00/ 32/ 67	00/ 00/100	00/ 00/ 00	00/ 00/ 00	00/ 30/ 69	0.1	****** + *******tau	****** + *******tau	****** + *******tau	****** + *******tau	0.44	0.05	0	-999	-999	-999
0	nocorr_fmatchedstrong_noclo	Aqua	All	110	3	0	0	6.55	0.35	00/ 40/ 60	00/ 00/100	00/ 00/ 00	00/ 00/ 00	00/ 38/ 61	0.08	****** + *******tau	****** + *******tau	****** + *******tau	****** + *******tau	0.46	0.06	0	-999	-999	-999
0	nocorr_fclimweak	Aqua	All	151	8	0	0	6.53	0.77	00/ 30/ 69	00/ 00/100	00/ 00/ 00	00/ 00/ 00	00/ 28/ 71	0.1	****** + *******tau	****** + *******tau	****** + *******tau	****** + *******tau	0.43	0.04	0	-999	-999	-999
0	nocorr_fclimweak_nocloud	Aqua	All	126	3	0	0	6.67	0.36	00/ 34/ 65	00/ 00/100	00/ 00/ 00	00/ 00/ 00	00/ 34/ 65	0.09	****** + *******tau	****** + *******tau	****** + *******tau	****** + *******tau	0.46	0.1	0	-999	-999	-999
0	nocorr_fclimstrong	Aqua	All	93	0	0	0	-999	-999	00/ 35/ 64	00/ 00/ 00	00/ 00/ 00	00/ 00/ 00	00/ 35/ 64	0.08	****** + *******tau	****** + *******tau	****** + *******tau	****** + *******tau	0.45	0.07	0	-999	-999	-999
0	nocorr_fclimstrong_nocloud	Aqua	All	75	1	0	0	-999	-999	00/ 41/ 58	00/ 00/100	00/ 00/ 00	00/ 00/ 00	00/ 40/ 59	0.07	****** + *******tau	****** + *******tau	****** + *******tau	****** + *******tau	0.45	0.1	0	-999	-999	-999
0	albcorr_fmatchedweak	Aqua	All	184	17	0	0	7.98	0.07	00/ 13/ 86	00/ 00/100	00/ 00/ 00	00/ 00/ 00	00/ 11/ 87	0.12	****** + *******tau	****** + *******tau	****** + *******tau	****** + *******tau	0.39	0.03	0	-999	-999	-999
0	albcorr_fmatchedweak_noclou	Aqua	All	156	8	0	0	8.73	0.11	00/ 19/ 79	00/ 00/100	00/ 00/ 00	00/ 00/ 00	00/ 18/ 80	0.11	****** + *******tau	****** + *******tau	****** + *******tau	****** + *******tau	0.41	0.07	0	-999	-999	-999
0	albcorr_fmatchedstrong	Aqua	All	129	14	0	0	9.02	0.02	00/ 08/ 91	00/ 00/100	00/ 00/ 00	00/ 00/ 00	00/ 07/ 92	0.13	****** + *******tau	****** + *******tau	****** + *******tau	****** + *******tau	0.28	0	0	-999	-999	-999
0	albcorr_fmatchedstrong_nocl	Aqua	All	108	5	0	0	7.74	0.07	00/ 11/ 88	00/ 00/100	00/ 00/ 00	00/ 00/ 00	00/ 10/ 89	0.11	****** + *******tau	****** + *******tau	****** + *******tau	****** + *******tau	0.28	0	0	-999	-999	-999
0	albcorr_fclimweak	Aqua	All	147	13	0	0	7.6	0.06	00/ 09/ 90	00/ 00/100	00/ 00/ 00	00/ 00/ 00	00/ 08/ 91	0.13	****** + *******tau	****** + *******tau	****** + *******tau	****** + *******tau	0.3	0	0	-999	-999	-999
0	albcorr_fclimweak_nocloud	Aqua	All	124	5	0	0	7.63	0.34	00/ 12/ 87	00/ 00/100	00/ 00/ 00	00/ 00/ 00	00/ 12/ 87	0.11	****** + *******tau	****** + *******tau	****** + *******tau	****** + *******tau	0.31	0	0	-999	-999	-999
0	albcorr_fclimstrong	Aqua	All	89	4	0	0	6.59	0.94	00/ 06/ 93	00/ 00/100	00/ 00/ 00	00/ 00/ 00	00/ 06/ 93	0.12	****** + *******tau	****** + *******tau	****** + *******tau	****** + *******tau	0.23	0	0	-999	-999	-999
0	albcorr_fclimstrong_nocloud	Aqua	All	75	1	0	0	-999	-999	00/ 06/ 93	00/ 00/100	00/ 00/ 00	00/ 00/ 00	00/ 06/ 93	0.11	****** + *******tau	****** + *******tau	****** + *******tau	****** + *******tau	0.23	0	0	-999	-999	-999
0	corr1_fclimweak	Aqua	All	147	13	0	0	7.6	0.06	00/ 09/ 90	00/ 00/100	00/ 00/ 00	00/ 00/ 00	00/ 08/ 91	0.13	****** + *******tau	****** + *******tau	****** + *******tau	****** + *******tau	0.3	0	0	-999	-999	-999
0	corr1_fclimweak_nocloud	Aqua	All	124	5	0	0	7.63	0.34	00/ 12/ 87	00/ 00/100	00/ 00/ 00	00/ 00/ 00	00/ 12/ 87	0.11	****** + *******tau	****** + *******tau	****** + *******tau	****** + *******tau	0.31	0	0	-999	-999	-999
0	corr1_fclimstrong	Aqua	All	89	4	0	0	6.59	0.94	00/ 06/ 93	00/ 00/100	00/ 00/ 00	00/ 00/ 00	00/ 06/ 93	0.12	****** + *******tau	****** + *******tau	****** + *******tau	****** + *******tau	0.23	0	0	-999	-999	-999
0	corr1_fclimstrong_nocloud	Aqua	All	75	1	0	0	-999	-999	00/ 06/ 93	00/ 00/100	00/ 00/ 00	00/ 00/ 00	00/ 06/ 93	0.11	****** + *******tau	****** + *******tau	****** + *******tau	****** + *******tau	0.23	0	0	-999	-999	-999
0	corr2_fmatchedweak	Aqua	All	184	17	0	0	7.98	0.07	00/ 13/ 86	00/ 00/100	00/ 00/ 00	00/ 00/ 00	00/ 11/ 87	0.12	****** + *******tau	****** + *******tau	****** + *******tau	****** + *******tau	0.39	0.03	0	-999	-999	-999
0	corr2_fmatchedweak_nocloud	Aqua	All	156	8	0	0	8.73	0.11	00/ 19/ 79	00/ 00/100	00/ 00/ 00	00/ 00/ 00	00/ 18/ 80	0.11	****** + *******tau	****** + *******tau	****** + *******tau	****** + *******tau	0.41	0.07	0	-999	-999	-999
0	corr2_fmatchedstrong	Aqua	All	129	14	0	0	9.02	0.02	00/ 08/ 91	00/ 00/100	00/ 00/ 00	00/ 00/ 00	00/ 07/ 92	0.13	****** + *******tau	****** + *******tau	****** + *******tau	****** + *******tau	0.28	0	0	-999	-999	-999
0	corr2_fmatchedstrong_noclou	Aqua	All	108	5	0	0	7.74	0.07	00/ 11/ 88	00/ 00/100	00/ 00/ 00	00/ 00/ 00	00/ 10/ 89	0.11	****** + *******tau	****** + *******tau	****** + *******tau	****** + *******tau	0.28	0	0	-999	-999	-999
1	raw_nobuddy	Terra	All	2224	568	51	7	1.26	0.49	02/ 72/ 25	01/ 23/ 75	01/ 39/ 58	00/ 00/100	01/ 62/ 35	0.11	-0.03 + 0.51*tau	****** + *******tau	0.04 + 0.39*tau	****** + *******tau	0.36	0.11	0.04	-999	-999	-999
1	raw_nosdcheck	Terra	All	2213	528	51	7	1.24	0.49	02/ 73/ 24	01/ 24/ 74	01/ 39/ 58	00/ 00/100	01/ 63/ 34	0.11	-0.02 + 0.46*tau	****** + *******tau	0.04 + 0.38*tau	****** + *******tau	0.36	0.11	0.04	-999	-999	-999
1	raw	Terra	All	2096	466	46	7	1.21	0.51	01/ 75/ 23	01/ 27/ 71	02/ 41/ 56	00/ 00/100	01/ 65/ 32	0.1	0.09 + 0.10*tau	****** + *******tau	0.06 + 0.29*tau	****** + *******tau	0.37	0.11	0.02	-999	-999	-999
1	raw_fqa	Terra	All	1522	218	30	4	1.23	0.67	02/ 89/ 07	01/ 39/ 59	00/ 50/ 50	00/ 00/100	02/ 82/ 15	0.09	-0.06 + 0.51*tau	****** + *******tau	0.06 + 0.21*tau	****** + *******tau	0.4	0.16	0.03	-999	-999	-999
1	raw_fqa_nocloud	Terra	All	1378	167	25	4	1.18	0.7	03/ 89/ 06	01/ 43/ 54	00/ 56/ 44	00/ 00/100	03/ 84/ 12	0.09	-0.09 + 0.55*tau	****** + *******tau	0.06 + 0.18*tau	****** + *******tau	0.4	0.19	0.05	-999	-999	-999
1	nocorr_fmatchedweak	Terra	All	1272	166	29	4	1.2	0.72	02/ 91/ 05	01/ 43/ 54	00/ 58/ 41	00/ 00/100	02/ 85/ 11	0.09	0.00 + 0.33*tau	****** + *******tau	0.03 + 0.26*tau	****** + *******tau	0.4	0.18	0.04	-999	-999	-999
1	nocorr_fmatchedweak_nocloud	Terra	All	1148	120	24	4	1.15	0.77	04/ 90/ 04	02/ 49/ 48	00/ 62/ 37	00/ 00/100	04/ 86/ 09	0.09	-0.07 + 0.49*tau	****** + *******tau	0.04 + 0.19*tau	****** + *******tau	0.41	0.21	0.06	-999	-999	-999
1	nocorr_fmatchedstrong	Terra	All	1011	109	18	3	0.99	0.66	04/ 93/ 01	03/ 61/ 34	05/ 66/ 27	00/ 00/100	04/ 89/ 05	0.05	-0.05 + 0.41*tau	****** + *******tau	0.01 + 0.26*tau	****** + *******tau	0.43	0.22	0.07	-999	-999	-999
1	nocorr_fmatchedstrong_noclo	Terra	All	890	80	14	3	0.95	0.68	06/ 92/ 01	05/ 70/ 25	07/ 71/ 21	00/ 00/100	06/ 89/ 03	0.04	-0.09 + 0.52*tau	****** + *******tau	-0.03 + 0.34*tau	****** + *******tau	0.43	0.25	0.1	-999	-999	-999
1	nocorr_fclimweak	Terra	All	1331	179	26	3	1.05	0.54	03/ 91/ 04	02/ 44/ 52	00/ 61/ 38	00/ 33/ 66	03/ 85/ 11	0.06	-0.04 + 0.41*tau	****** + *******tau	0.04 + 0.25*tau	****** + *******tau	0.41	0.18	0.05	-999	-999	-999
1	nocorr_fclimweak_nocloud	Terra	All	1187	130	21	3	0.99	0.59	05/ 91/ 03	03/ 51/ 44	00/ 66/ 33	00/ 33/ 66	05/ 87/ 07	0.05	-0.04 + 0.38*tau	****** + *******tau	0.04 + 0.22*tau	****** + *******tau	0.42	0.21	0.07	-999	-999	-999
1	nocorr_fclimstrong	Terra	All	971	96	13	2	1.08	0.77	05/ 91/ 02	02/ 68/ 29	00/ 76/ 23	00/ 00/100	05/ 89/ 05	0.05	0.03 + 0.14*tau	****** + *******tau	0.05 + 0.11*tau	****** + *******tau	0.44	0.22	0.09	-999	-999	-999
1	nocorr_fclimstrong_nocloud	Terra	All	820	67	13	2	1.06	0.78	07/ 90/ 01	02/ 73/ 23	00/ 76/ 23	00/ 00/100	07/ 89/ 03	0.04	0.02 + 0.15*tau	****** + *******tau	0.03 + 0.13*tau	****** + *******tau	0.47	0.26	0.13	-999	-999	-999
1	albcorr_fmatchedweak	Terra	All	1244	196	30	4	1.22	0.74	01/ 86/ 11	02/ 42/ 55	00/ 60/ 40	00/ 00/100	01/ 80/ 17	0.09	-0.06 + 0.53*tau	****** + *******tau	0.05 + 0.19*tau	****** + *******tau	0.31	0.08	0.04	-999	-999	-999
1	albcorr_fmatchedweak_noclou	Terra	All	1137	134	23	4	1.17	0.79	02/ 88/ 08	02/ 45/ 52	00/ 60/ 39	00/ 00/100	02/ 83/ 14	0.09	-0.05 + 0.42*tau	****** + *******tau	0.05 + 0.17*tau	****** + *******tau	0.31	0.09	0.05	-999	-999	-999
1	albcorr_fmatchedstrong	Terra	All	977	148	18	3	1.03	0.69	01/ 90/ 08	02/ 54/ 43	05/ 66/ 27	00/ 00/100	01/ 85/ 13	0.05	0.05 + 0.11*tau	****** + *******tau	0.01 + 0.28*tau	****** + *******tau	0.28	0.02	0	-999	-999	-999
1	albcorr_fmatchedstrong_nocl	Terra	All	869	106	14	3	1	0.7	01/ 93/ 05	03/ 57/ 38	07/ 71/ 21	00/ 00/100	01/ 88/ 09	0.04	-0.02 + 0.33*tau	****** + *******tau	0.02 + 0.23*tau	****** + *******tau	0.26	0.02	0.01	-999	-999	-999
1	albcorr_fclimweak	Terra	All	1281	229	30	3	1.12	0.59	01/ 84/ 14	02/ 34/ 63	00/ 50/ 50	00/ 33/ 66	01/ 76/ 22	0.07	0.02 + 0.27*tau	****** + *******tau	0.05 + 0.23*tau	****** + *******tau	0.28	0.03	0.01	-999	-999	-999
1	albcorr_fclimweak_nocloud	Terra	All	1155	164	23	3	1.05	0.62	01/ 86/ 11	03/ 44/ 52	00/ 56/ 43	00/ 33/ 66	01/ 80/ 17	0.06	0.03 + 0.18*tau	****** + *******tau	0.05 + 0.21*tau	****** + *******tau	0.28	0.04	0.01	-999	-999	-999
1	albcorr_fclimstrong	Terra	All	926	140	15	2	1.18	0.79	00/ 88/ 11	01/ 52/ 45	00/ 73/ 26	00/ 00/100	00/ 83/ 15	0.05	0.05 + 0.11*tau	****** + *******tau	0.06 + 0.14*tau	****** + *******tau	0.26	0.01	0	-999	-999	-999
1	albcorr_fclimstrong_nocloud	Terra	All	796	94	14	2	1.15	0.81	01/ 90/ 07	02/ 67/ 30	00/ 64/ 35	00/ 00/100	01/ 87/ 10	0.04	-0.11 + 0.60*tau	****** + *******tau	0.04 + 0.14*tau	****** + *******tau	0.26	0.01	0	-999	-999	-999
1	corr1_fclimweak	Terra	All	1328	199	20	2	0.98	0.6	01/ 84/ 14	02/ 48/ 48	00/ 85/ 15	00/ 00/100	01/ 79/ 18	0.06	-0.03 + 0.33*tau	****** + *******tau	0.03 + 0.22*tau	****** + *******tau	0.27	0.03	0.01	-999	-999	-999
1	corr1_fclimweak_nocloud	Terra	All	1185	146	15	2	0.92	0.64	01/ 86/ 11	02/ 54/ 42	00/ 86/ 13	00/ 00/100	01/ 83/ 15	0.05	-0.06 + 0.37*tau	****** + *******tau	0.04 + 0.20*tau	****** + *******tau	0.27	0.04	0.01	-999	-999	-999
1	corr1_fclimstrong	Terra	All	954	122	8	2	1.02	0.78	00/ 88/ 10	01/ 65/ 32	00/100/ 00	00/ 00/100	01/ 85/ 13	0.05	-0.07 + 0.42*tau	****** + *******tau	0.04 + 0.12*tau	****** + *******tau	0.26	0.01	0	-999	-999	-999
1	corr1_fclimstrong_nocloud	Terra	All	815	80	10	2	0.99	0.79	01/ 91/ 07	02/ 73/ 23	00/ 90/ 10	00/ 00/100	01/ 89/ 09	0.04	-0.07 + 0.39*tau	****** + *******tau	0.02 + 0.14*tau	****** + *******tau	0.25	0.01	0	-999	-999	-999
1	corr2_fmatchedweak	Terra	All	1281	176	19	4	1.06	0.74	01/ 87/ 11	02/ 50/ 46	00/ 89/ 10	00/ 25/ 75	01/ 82/ 15	0.08	-0.00 + 0.26*tau	****** + *******tau	0.05 + 0.15*tau	****** + *******tau	0.31	0.08	0.04	-999	-999	-999
1	corr2_fmatchedweak_nocloud	Terra	All	1160	126	15	4	1.02	0.78	02/ 88/ 09	03/ 57/ 39	00/ 93/ 06	00/ 25/ 75	02/ 85/ 12	0.08	-0.07 + 0.41*tau	****** + *******tau	0.06 + 0.09*tau	****** + *******tau	0.31	0.09	0.05	-999	-999	-999
1	corr2_fmatchedstrong	Terra	All	1006	130	13	3	0.9	0.67	01/ 91/ 07	03/ 62/ 33	07/ 84/ 07	00/ 33/ 66	01/ 87/ 10	0.04	-0.00 + 0.22*tau	****** + *******tau	0.03 + 0.18*tau	****** + *******tau	0.27	0.02	0	-999	-999	-999
1	corr2_fmatchedstrong_noclou	Terra	All	892	89	11	3	0.86	0.68	01/ 92/ 05	04/ 70/ 24	09/ 90/ 00	00/ 33/ 66	01/ 90/ 07	0.04	0.01 + 0.14*tau	****** + *******tau	-0.01 + 0.26*tau	****** + *******tau	0.26	0.02	0.01	-999	-999	-999
1	raw_nobuddy	Aqua	All	2089	567	47	3	1.11	0.47	01/ 71/ 26	00/ 21/ 78	04/ 36/ 59	00/ 00/100	01/ 60/ 38	0.1	0.09 + 0.15*tau	****** + *******tau	0.05 + 0.38*tau	****** + *******tau	0.34	0.07	0.03	-999	-999	-999
1	raw_nosdcheck	Aqua	All	2062	516	46	3	1.09	0.47	01/ 72/ 26	00/ 23/ 76	04/ 34/ 60	00/ 00/100	01/ 61/ 36	0.1	0.07 + 0.18*tau	****** + *******tau	0.04 + 0.38*tau	****** + *******tau	0.34	0.07	0.03	-999	-999	-999
1	raw	Aqua	All	1963	455	42	2	1.06	0.47	01/ 73/ 24	00/ 25/ 74	07/ 30/ 61	00/ 00/100	01/ 63/ 34	0.09	0.02 + 0.34*tau	****** + *******tau	0.05 + 0.34*tau	****** + *******tau	0.35	0.06	0.02	-999	-999	-999
1	raw_fqa	Aqua	All	1341	193	26	1	1.13	0.56	01/ 88/ 09	01/ 44/ 54	00/ 42/ 57	00/ 00/100	01/ 82/ 16	0.06	0.02 + 0.31*tau	****** + *******tau	0.04 + 0.25*tau	****** + *******tau	0.33	0.08	0.02	-999	-999	-999
1	raw_fqa_nocloud	Aqua	All	1206	139	24	1	1.09	0.52	02/ 89/ 08	01/ 51/ 47	00/ 37/ 62	00/ 00/100	02/ 84/ 13	0.06	-0.02 + 0.44*tau	****** + *******tau	0.01 + 0.32*tau	****** + *******tau	0.32	0.08	0.03	-999	-999	-999
1	nocorr_fmatchedweak	Aqua	All	1140	150	25	1	1.1	0.57	01/ 91/ 06	01/ 49/ 49	00/ 44/ 56	00/ 00/100	01/ 85/ 12	0.05	-0.03 + 0.45*tau	****** + *******tau	0.03 + 0.27*tau	****** + *******tau	0.34	0.09	0.03	-999	-999	-999
1	nocorr_fmatchedweak_nocloud	Aqua	All	1024	108	23	1	1.06	0.52	02/ 92/ 05	01/ 55/ 42	00/ 39/ 60	00/ 00/100	02/ 87/ 09	0.05	-0.05 + 0.50*tau	****** + *******tau	0.01 + 0.31*tau	****** + *******tau	0.32	0.1	0.04	-999	-999	-999
1	nocorr_fmatchedstrong	Aqua	All	924	91	12	0	1.17	0.79	03/ 92/ 04	01/ 67/ 31	00/ 50/ 50	00/ 00/ 00	02/ 90/ 07	0.04	0.02 + 0.21*tau	****** + *******tau	0.01 + 0.22*tau	****** + *******tau	0.36	0.13	0.04	-999	-999	-999
1	nocorr_fmatchedstrong_noclo	Aqua	All	815	58	10	0	1.14	0.73	03/ 93/ 02	01/ 68/ 29	00/ 50/ 50	00/ 00/ 00	03/ 91/ 04	0.04	-0.02 + 0.31*tau	****** + *******tau	-0.03 + 0.30*tau	****** + *******tau	0.35	0.15	0.06	-999	-999	-999
1	nocorr_fclimweak	Aqua	All	1204	158	19	2	1.07	0.53	02/ 90/ 07	01/ 51/ 46	00/ 47/ 52	00/ 00/100	02/ 85/ 12	0.05	0.07 + 0.13*tau	****** + *******tau	0.02 + 0.28*tau	****** + *******tau	0.33	0.09	0.03	-999	-999	-999
1	nocorr_fclimweak_nocloud	Aqua	All	1054	109	17	2	1.02	0.48	03/ 91/ 04	01/ 57/ 40	00/ 47/ 52	00/ 00/100	03/ 87/ 09	0.05	0.03 + 0.22*tau	****** + *******tau	0.01 + 0.29*tau	****** + *******tau	0.33	0.1	0.04	-999	-999	-999
1	nocorr_fclimstrong	Aqua	All	879	81	13	1	1	0.53	03/ 92/ 03	01/ 64/ 34	07/ 38/ 53	00/ 00/100	03/ 89/ 06	0.05	-0.17 + 0.83*tau	****** + *******tau	-0.03 + 0.39*tau	****** + *******tau	0.37	0.14	0.06	-999	-999	-999
1	nocorr_fclimstrong_nocloud	Aqua	All	759	50	10	1	0.92	0.44	05/ 92/ 02	02/ 72/ 26	10/ 30/ 60	00/ 00/100	05/ 90/ 04	0.05	-0.14 + 0.75*tau	****** + *******tau	-0.09 + 0.55*tau	****** + *******tau	0.37	0.17	0.07	-999	-999	-999
1	albcorr_fmatchedweak	Aqua	All	1111	184	25	1	1.13	0.58	01/ 84/ 13	01/ 43/ 55	00/ 44/ 56	00/ 00/100	01/ 78/ 20	0.06	0.03 + 0.29*tau	****** + *******tau	0.05 + 0.23*tau	****** + *******tau	0.27	0.05	0.03	-999	-999	-999
1	albcorr_fmatchedweak_noclou	Aqua	All	1005	133	23	1	1.07	0.54	01/ 86/ 11	01/ 52/ 45	00/ 39/ 60	00/ 00/100	01/ 82/ 16	0.05	0.06 + 0.19*tau	****** + *******tau	0.03 + 0.28*tau	****** + *******tau	0.27	0.06	0.04	-999	-999	-999
1	albcorr_fmatchedstrong	Aqua	All	897	126	12	0	1.21	0.78	00/ 86/ 12	01/ 53/ 44	00/ 50/ 50	00/ 00/ 00	00/ 82/ 16	0.05	0.02 + 0.23*tau	****** + *******tau	0.04 + 0.20*tau	****** + *******tau	0.24	0.01	0	-999	-999	-999
1	albcorr_fmatchedstrong_nocl	Aqua	All	789	92	10	0	1.18	0.76	00/ 88/ 10	01/ 65/ 33	00/ 50/ 50	00/ 00/ 00	00/ 86/ 13	0.05	0.03 + 0.19*tau	****** + *******tau	0.01 + 0.26*tau	****** + *******tau	0.23	0.01	0	-999	-999	-999
1	albcorr_fclimweak	Aqua	All	1159	202	26	2	1.14	0.56	00/ 83/ 16	00/ 40/ 59	03/ 38/ 57	00/ 00/100	00/ 75/ 23	0.07	-0.04 + 0.50*tau	****** + *******tau	0.02 + 0.32*tau	****** + *******tau	0.24	0.01	0.01	-999	-999	-999
1	albcorr_fclimweak_nocloud	Aqua	All	1023	141	24	2	1.08	0.52	00/ 85/ 13	00/ 49/ 49	04/ 41/ 54	00/ 00/100	00/ 80/ 18	0.06	-0.06 + 0.54*tau	****** + *******tau	0.00 + 0.36*tau	****** + *******tau	0.23	0.02	0.01	-999	-999	-999
1	albcorr_fclimstrong	Aqua	All	838	122	15	1	1.08	0.56	00/ 85/ 13	01/ 47/ 50	06/ 20/ 73	00/ 00/100	00/ 79/ 19	0.06	-0.12 + 0.73*tau	****** + *******tau	-0.02 + 0.41*tau	****** + *******tau	0.23	0.01	0	-999	-999	-999
1	albcorr_fclimstrong_nocloud	Aqua	All	729	82	12	1	0.99	0.49	00/ 88/ 10	02/ 65/ 31	08/ 25/ 66	00/ 00/100	00/ 85/ 13	0.05	-0.16 + 0.86*tau	****** + *******tau	-0.06 + 0.51*tau	****** + *******tau	0.22	0	0	-999	-999	-999
1	corr1_fclimweak	Aqua	All	1231	150	13	1	0.91	0.55	00/ 83/ 16	02/ 61/ 36	00/ 76/ 23	00/ 00/100	00/ 80/ 18	0.05	-0.10 + 0.53*tau	****** + *******tau	0.02 + 0.24*tau	****** + *******tau	0.23	0.01	0.01	-999	-999	-999
1	corr1_fclimweak_nocloud	Aqua	All	1077	105	11	1	0.86	0.51	00/ 85/ 13	03/ 69/ 26	00/ 81/ 18	00/ 00/100	00/ 84/ 14	0.05	-0.14 + 0.64*tau	****** + *******tau	-0.00 + 0.29*tau	****** + *******tau	0.22	0.02	0.01	-999	-999	-999
1	corr1_fclimstrong	Aqua	All	883	87	8	1	0.85	0.52	00/ 86/ 12	03/ 70/ 26	00/ 75/ 25	00/ 00/100	01/ 84/ 14	0.05	-0.07 + 0.45*tau	****** + *******tau	0.01 + 0.27*tau	****** + *******tau	0.22	0	0	-999	-999	-999
1	corr1_fclimstrong_nocloud	Aqua	All	761	57	6	1	0.78	0.44	00/ 89/ 09	05/ 73/ 21	00/ 66/ 33	00/ 00/100	01/ 88/ 10	0.04	-0.16 + 0.68*tau	****** + *******tau	-0.02 + 0.34*tau	****** + *******tau	0.21	0	0	-999	-999	-999
1	corr2_fmatchedweak	Aqua	All	1177	130	16	1	0.89	0.52	01/ 84/ 14	02/ 64/ 33	00/ 62/ 37	00/ 00/100	01/ 82/ 16	0.05	-0.10 + 0.49*tau	****** + *******tau	0.06 + 0.11*tau	****** + *******tau	0.26	0.05	0.03	-999	-999	-999
1	corr2_fmatchedweak_nocloud	Aqua	All	1057	92	14	1	0.85	0.46	01/ 86/ 11	04/ 68/ 27	00/ 71/ 28	00/ 00/100	01/ 85/ 13	0.05	-0.10 + 0.50*tau	****** + *******tau	0.05 + 0.15*tau	****** + *******tau	0.26	0.06	0.04	-999	-999	-999
1	corr2_fmatchedstrong	Aqua	All	937	92	9	0	0.97	0.76	01/ 87/ 11	02/ 73/ 23	00/ 88/ 11	00/ 00/ 00	01/ 86/ 12	0.05	0.01 + 0.14*tau	****** + *******tau	0.05 + 0.09*tau	****** + *******tau	0.24	0.01	0	-999	-999	-999
1	corr2_fmatchedstrong_noclou	Aqua	All	824	63	7	0	0.93	0.7	00/ 90/ 08	04/ 77/ 17	00/ 85/ 14	00/ 00/ 00	01/ 89/ 09	0.04	-0.01 + 0.23*tau	****** + *******tau	0.03 + 0.14*tau	****** + *******tau	0.23	0.01	0	-999	-999	-999
2	raw_nobuddy	Terra	All	6431	2615	342	0	1.1	0.54	11/ 82/ 06	03/ 58/ 38	04/ 52/ 42	00/ 00/ 00	08/ 74/ 16	0.08	0.06 + 0.12*tau	****** + *******tau	0.01 + 0.26*tau	****** + *******tau	0.3	0.1	0.04	-999	-999	-999
2	raw_nosdcheck	Terra	All	6395	2565	335	1	1.09	0.55	11/ 82/ 06	03/ 59/ 37	04/ 53/ 42	00/ 00/100	09/ 75/ 15	0.07	0.05 + 0.13*tau	****** + *******tau	0.01 + 0.27*tau	****** + *******tau	0.29	0.1	0.04	-999	-999	-999
2	raw	Terra	All	6053	2399	302	0	1.08	0.56	09/ 84/ 05	03/ 61/ 35	04/ 54/ 40	00/ 00/ 00	07/ 77/ 15	0.07	0.05 + 0.14*tau	****** + *******tau	0.01 + 0.25*tau	****** + *******tau	0.3	0.09	0.01	-999	-999	-999
2	raw_fqa	Terra	All	4489	1274	143	0	0.99	0.59	12/ 84/ 02	05/ 74/ 19	07/ 65/ 27	00/ 00/ 00	11/ 81/ 07	0.06	0.02 + 0.19*tau	****** + *******tau	0.00 + 0.23*tau	****** + *******tau	0.27	0.11	0.02	-999	-999	-999
2	raw_fqa_nocloud	Terra	All	4270	1092	125	0	0.97	0.62	14/ 83/ 02	06/ 76/ 17	08/ 69/ 22	00/ 00/ 00	12/ 81/ 05	0.05	0.02 + 0.18*tau	****** + *******tau	0.01 + 0.20*tau	****** + *******tau	0.27	0.11	0.03	-999	-999	-999
2	nocorr_fmatchedweak	Terra	All	4147	1210	138	0	0.98	0.6	13/ 84/ 02	06/ 77/ 16	07/ 68/ 23	00/ 00/ 00	11/ 82/ 06	0.05	0.01 + 0.20*tau	****** + *******tau	-0.00 + 0.23*tau	****** + *******tau	0.27	0.11	0.02	-999	-999	-999
2	nocorr_fmatchedweak_nocloud	Terra	All	3944	1045	121	0	0.97	0.63	14/ 83/ 01	06/ 78/ 15	08/ 72/ 19	00/ 00/ 00	12/ 82/ 05	0.05	0.01 + 0.20*tau	****** + *******tau	0.01 + 0.19*tau	****** + *******tau	0.27	0.11	0.03	-999	-999	-999
2	nocorr_fmatchedstrong	Terra	All	3408	1065	126	0	0.96	0.6	14/ 83/ 01	06/ 79/ 13	09/ 68/ 22	00/ 00/ 00	12/ 82/ 04	0.05	0.02 + 0.18*tau	****** + *******tau	0.01 + 0.20*tau	****** + *******tau	0.26	0.11	0.03	-999	-999	-999
2	nocorr_fmatchedstrong_noclo	Terra	All	3217	912	109	0	0.94	0.63	16/ 82/ 01	08/ 80/ 11	09/ 74/ 16	00/ 00/ 00	14/ 81/ 03	0.05	0.02 + 0.19*tau	****** + *******tau	0.01 + 0.19*tau	****** + *******tau	0.26	0.11	0.03	-999	-999	-999
2	nocorr_fclimweak	Terra	All	3867	1182	136	0	0.98	0.59	14/ 83/ 01	06/ 77/ 16	08/ 65/ 25	00/ 00/ 00	12/ 81/ 05	0.06	0.01 + 0.20*tau	****** + *******tau	-0.00 + 0.24*tau	****** + *******tau	0.27	0.11	0.03	-999	-999	-999
2	nocorr_fclimweak_nocloud	Terra	All	3669	1015	118	0	0.96	0.63	15/ 83/ 01	06/ 79/ 13	08/ 72/ 19	00/ 00/ 00	13/ 81/ 04	0.05	0.01 + 0.22*tau	****** + *******tau	-0.02 + 0.26*tau	****** + *******tau	0.27	0.12	0.03	-999	-999	-999
2	nocorr_fclimstrong	Terra	All	3132	1009	121	0	0.96	0.59	16/ 82/ 01	07/ 79/ 13	10/ 66/ 22	00/ 00/ 00	14/ 81/ 04	0.06	0.00 + 0.23*tau	****** + *******tau	-0.03 + 0.31*tau	****** + *******tau	0.26	0.11	0.03	-999	-999	-999
2	nocorr_fclimstrong_nocloud	Terra	All	2935	863	107	0	0.94	0.63	17/ 81/ 00	07/ 81/ 10	10/ 73/ 15	00/ 00/ 00	15/ 81/ 03	0.05	0.01 + 0.21*tau	****** + *******tau	-0.00 + 0.21*tau	****** + *******tau	0.26	0.11	0.04	-999	-999	-999
2	albcorr_fmatchedweak	Terra	All	3932	1435	142	0	1.03	0.64	04/ 91/ 04	03/ 73/ 22	07/ 69/ 23	00/ 00/ 00	04/ 86/ 09	0.05	0.02 + 0.16*tau	****** + *******tau	0.01 + 0.20*tau	****** + *******tau	0.22	0.04	0.02	-999	-999	-999
2	albcorr_fmatchedweak_noclou	Terra	All	3741	1252	122	0	1.01	0.66	05/ 91/ 03	03/ 76/ 19	07/ 73/ 18	00/ 00/ 00	05/ 87/ 07	0.05	0.01 + 0.19*tau	****** + *******tau	0.00 + 0.21*tau	****** + *******tau	0.22	0.04	0.02	-999	-999	-999
2	albcorr_fmatchedstrong	Terra	All	3188	1288	127	0	1.01	0.65	04/ 91/ 03	03/ 76/ 20	07/ 70/ 22	00/ 00/ 00	04/ 86/ 08	0.05	0.00 + 0.21*tau	****** + *******tau	-0.01 + 0.25*tau	****** + *******tau	0.19	0.01	0	-999	-999	-999
2	albcorr_fmatchedstrong_nocl	Terra	All	3016	1120	109	0	0.99	0.67	05/ 91/ 03	04/ 78/ 16	08/ 75/ 16	00/ 00/ 00	04/ 88/ 07	0.04	0.00 + 0.20*tau	****** + *******tau	0.00 + 0.21*tau	****** + *******tau	0.19	0.01	0	-999	-999	-999
2	albcorr_fclimweak	Terra	All	3597	1435	164	0	1.06	0.64	03/ 91/ 04	02/ 71/ 25	04/ 62/ 33	00/ 00/ 00	03/ 85/ 11	0.05	0.02 + 0.17*tau	****** + *******tau	0.00 + 0.23*tau	****** + *******tau	0.2	0.01	0	-999	-999	-999
2	albcorr_fclimweak_nocloud	Terra	All	3435	1241	139	0	1.04	0.67	04/ 92/ 03	03/ 76/ 20	04/ 69/ 26	00/ 00/ 00	04/ 87/ 08	0.05	0.02 + 0.18*tau	****** + *******tau	0.00 + 0.22*tau	****** + *******tau	0.19	0.01	0	-999	-999	-999
2	albcorr_fclimstrong	Terra	All	2883	1243	147	0	1.04	0.64	03/ 92/ 03	03/ 73/ 23	06/ 63/ 30	00/ 00/ 00	03/ 86/ 10	0.05	0.01 + 0.20*tau	****** + *******tau	-0.02 + 0.28*tau	****** + *******tau	0.18	0	0	-999	-999	-999
2	albcorr_fclimstrong_nocloud	Terra	All	2714	1073	128	0	1.02	0.67	04/ 92/ 02	03/ 78/ 17	06/ 68/ 25	00/ 00/ 00	04/ 88/ 07	0.04	0.01 + 0.19*tau	****** + *******tau	-0.00 + 0.22*tau	****** + *******tau	0.17	0	0	-999	-999	-999
2	corr1_fclimweak	Terra	All	3649	1411	141	0	1.01	0.64	04/ 91/ 04	03/ 75/ 20	07/ 68/ 24	00/ 00/ 00	04/ 86/ 09	0.05	0.01 + 0.18*tau	****** + *******tau	0.01 + 0.19*tau	****** + *******tau	0.19	0.01	0	-999	-999	-999
2	corr1_fclimweak_nocloud	Terra	All	3485	1212	122	0	0.99	0.67	04/ 91/ 03	04/ 78/ 16	08/ 72/ 18	00/ 00/ 00	04/ 88/ 07	0.04	0.01 + 0.18*tau	****** + *******tau	0.01 + 0.18*tau	****** + *******tau	0.19	0.01	0	-999	-999	-999
2	corr1_fclimstrong	Terra	All	2925	1223	127	0	0.99	0.63	03/ 92/ 03	04/ 78/ 17	08/ 67/ 23	00/ 00/ 00	04/ 87/ 08	0.05	0.00 + 0.21*tau	****** + *******tau	-0.00 + 0.22*tau	****** + *******tau	0.18	0	0	-999	-999	-999
2	corr1_fclimstrong_nocloud	Terra	All	2759	1047	112	0	0.97	0.66	04/ 93/ 02	04/ 80/ 14	09/ 71/ 18	00/ 00/ 00	04/ 89/ 06	0.04	0.00 + 0.20*tau	****** + *******tau	0.01 + 0.19*tau	****** + *******tau	0.17	0	0	-999	-999	-999
2	corr2_fmatchedweak	Terra	All	3982	1408	124	0	0.98	0.63	04/ 91/ 04	04/ 77/ 18	08/ 68/ 22	00/ 00/ 00	04/ 87/ 08	0.05	-0.00 + 0.22*tau	****** + *******tau	0.00 + 0.22*tau	****** + *******tau	0.22	0.04	0.02	-999	-999	-999
2	corr2_fmatchedweak_nocloud	Terra	All	3793	1216	110	0	0.96	0.66	05/ 91/ 03	04/ 80/ 15	09/ 74/ 16	00/ 00/ 00	05/ 88/ 06	0.04	0.01 + 0.19*tau	****** + *******tau	0.01 + 0.18*tau	****** + *******tau	0.22	0.04	0.02	-999	-999	-999
2	corr2_fmatchedstrong	Terra	All	3234	1260	112	0	0.96	0.64	04/ 91/ 03	04/ 79/ 15	09/ 66/ 23	00/ 00/ 00	04/ 87/ 07	0.05	-0.00 + 0.22*tau	****** + *******tau	0.01 + 0.20*tau	****** + *******tau	0.19	0.01	0	-999	-999	-999
2	corr2_fmatchedstrong_noclou	Terra	All	3062	1088	97	0	0.95	0.66	05/ 91/ 03	05/ 82/ 12	10/ 73/ 16	00/ 00/ 00	05/ 88/ 05	0.04	-0.00 + 0.22*tau	****** + *******tau	0.01 + 0.19*tau	****** + *******tau	0.19	0.01	0	-999	-999	-999
2	raw_nobuddy	Aqua	All	5621	2758	402	2	1.17	0.59	09/ 83/ 07	01/ 50/ 47	02/ 45/ 51	00/ 50/ 50	06/ 71/ 22	0.08	0.06 + 0.13*tau	****** + *******tau	0.02 + 0.25*tau	****** + *******tau	0.31	0.12	0.07	-999	-999	-999
2	raw_nosdcheck	Aqua	All	5574	2690	395	2	1.16	0.59	09/ 83/ 07	01/ 51/ 46	02/ 45/ 51	00/ 50/ 50	06/ 71/ 21	0.08	0.06 + 0.13*tau	****** + *******tau	0.02 + 0.24*tau	****** + *******tau	0.31	0.12	0.07	-999	-999	-999
2	raw	Aqua	All	5273	2516	364	2	1.15	0.61	07/ 84/ 07	01/ 53/ 44	02/ 48/ 48	00/ 50/ 50	05/ 73/ 20	0.08	0.06 + 0.13*tau	****** + *******tau	0.02 + 0.24*tau	****** + *******tau	0.31	0.11	0.04	-999	-999	-999
2	raw_fqa	Aqua	All	3720	1160	124	0	1.04	0.64	11/ 85/ 02	03/ 71/ 24	04/ 62/ 32	00/ 00/ 00	09/ 81/ 08	0.06	0.04 + 0.15*tau	****** + *******tau	0.02 + 0.19*tau	****** + *******tau	0.28	0.12	0.05	-999	-999	-999
2	raw_fqa_nocloud	Aqua	All	3506	982	106	0	1.01	0.65	12/ 84/ 02	04/ 75/ 20	03/ 67/ 28	00/ 00/ 00	10/ 82/ 06	0.06	0.03 + 0.14*tau	****** + *******tau	0.03 + 0.16*tau	****** + *******tau	0.28	0.13	0.05	-999	-999	-999
2	nocorr_fmatchedweak	Aqua	All	3438	1099	122	0	1.04	0.64	11/ 85/ 02	03/ 73/ 23	04/ 63/ 31	00/ 00/ 00	09/ 82/ 07	0.06	0.04 + 0.14*tau	****** + *******tau	0.02 + 0.19*tau	****** + *******tau	0.28	0.12	0.04	-999	-999	-999
2	nocorr_fmatchedweak_nocloud	Aqua	All	3238	936	104	0	1.01	0.65	13/ 84/ 01	04/ 76/ 19	03/ 69/ 26	00/ 00/ 00	11/ 82/ 06	0.06	0.03 + 0.14*tau	****** + *******tau	0.02 + 0.17*tau	****** + *******tau	0.28	0.12	0.05	-999	-999	-999
2	nocorr_fmatchedstrong	Aqua	All	2755	922	101	0	1.01	0.66	13/ 85/ 01	03/ 77/ 18	04/ 69/ 25	00/ 00/ 00	10/ 82/ 06	0.06	0.03 + 0.14*tau	****** + *******tau	0.01 + 0.18*tau	****** + *******tau	0.28	0.12	0.05	-999	-999	-999
2	nocorr_fmatchedstrong_noclo	Aqua	All	2572	783	85	0	0.98	0.67	14/ 84/ 00	04/ 81/ 14	03/ 75/ 21	00/ 00/ 00	12/ 83/ 04	0.06	0.03 + 0.14*tau	****** + *******tau	0.03 + 0.13*tau	****** + *******tau	0.27	0.13	0.06	-999	-999	-999
2	nocorr_fclimweak	Aqua	All	3250	1051	112	0	1.03	0.63	12/ 85/ 02	03/ 74/ 22	05/ 64/ 30	00/ 00/ 00	09/ 82/ 07	0.06	0.03 + 0.17*tau	****** + *******tau	-0.00 + 0.24*tau	****** + *******tau	0.29	0.12	0.05	-999	-999	-999
2	nocorr_fclimweak_nocloud	Aqua	All	3043	893	93	0	1	0.65	13/ 84/ 01	04/ 77/ 18	04/ 69/ 25	00/ 00/ 00	11/ 82/ 05	0.05	0.03 + 0.15*tau	****** + *******tau	0.01 + 0.18*tau	****** + *******tau	0.28	0.13	0.06	-999	-999	-999
2	nocorr_fclimstrong	Aqua	All	2581	870	90	1	1.01	0.66	13/ 85/ 01	03/ 78/ 17	04/ 65/ 30	00/ 00/100	10/ 83/ 06	0.06	0.02 + 0.18*tau	****** + *******tau	-0.00 + 0.23*tau	****** + *******tau	0.27	0.12	0.05	-999	-999	-999
2	nocorr_fclimstrong_nocloud	Aqua	All	2396	736	72	0	0.98	0.66	15/ 84/ 00	03/ 84/ 11	05/ 69/ 25	00/ 00/ 00	12/ 83/ 03	0.05	0.02 + 0.16*tau	****** + *******tau	0.01 + 0.19*tau	****** + *******tau	0.26	0.13	0.06	-999	-999	-999
2	albcorr_fmatchedweak	Aqua	All	3214	1330	124	0	1.08	0.67	04/ 91/ 04	02/ 67/ 29	04/ 62/ 32	00/ 00/ 00	03/ 83/ 12	0.06	0.04 + 0.13*tau	****** + *******tau	0.02 + 0.19*tau	****** + *******tau	0.23	0.04	0.02	-999	-999	-999
2	albcorr_fmatchedweak_noclou	Aqua	All	3063	1123	105	0	1.05	0.69	04/ 91/ 03	03/ 72/ 24	03/ 69/ 26	00/ 00/ 00	04/ 86/ 09	0.05	0.03 + 0.14*tau	****** + *******tau	0.02 + 0.17*tau	****** + *******tau	0.22	0.04	0.02	-999	-999	-999
2	albcorr_fmatchedstrong	Aqua	All	2563	1122	103	0	1.06	0.69	03/ 92/ 03	02/ 70/ 27	04/ 66/ 28	00/ 00/ 00	03/ 85/ 11	0.05	0.04 + 0.12*tau	****** + *******tau	0.02 + 0.17*tau	****** + *******tau	0.21	0.01	0	-999	-999	-999
2	albcorr_fmatchedstrong_nocl	Aqua	All	2415	950	85	0	1.03	0.7	03/ 93/ 02	03/ 74/ 22	03/ 75/ 21	00/ 00/ 00	03/ 87/ 08	0.05	0.03 + 0.13*tau	****** + *******tau	0.03 + 0.13*tau	****** + *******tau	0.2	0.01	0	-999	-999	-999
2	albcorr_fclimweak	Aqua	All	2992	1276	152	1	1.11	0.68	03/ 91/ 05	02/ 66/ 31	02/ 56/ 40	00/ 00/100	02/ 83/ 14	0.06	0.04 + 0.15*tau	****** + *******tau	0.01 + 0.22*tau	****** + *******tau	0.21	0.01	0	-999	-999	-999
2	albcorr_fclimweak_nocloud	Aqua	All	2838	1080	123	0	1.08	0.69	03/ 91/ 04	02/ 70/ 27	03/ 67/ 29	00/ 00/ 00	03/ 85/ 11	0.05	0.04 + 0.14*tau	****** + *******tau	0.02 + 0.18*tau	****** + *******tau	0.2	0.02	0	-999	-999	-999
2	albcorr_fclimstrong	Aqua	All	2355	1075	123	1	1.09	0.69	02/ 93/ 03	02/ 68/ 28	03/ 56/ 39	00/ 00/100	02/ 84/ 12	0.05	0.04 + 0.14*tau	****** + *******tau	0.00 + 0.23*tau	****** + *******tau	0.19	0	0	-999	-999	-999
2	albcorr_fclimstrong_nocloud	Aqua	All	2213	910	93	0	1.06	0.7	03/ 93/ 03	02/ 72/ 24	04/ 68/ 26	00/ 00/ 00	03/ 87/ 09	0.05	0.03 + 0.13*tau	****** + *******tau	0.02 + 0.18*tau	****** + *******tau	0.18	0	0	-999	-999	-999
2	corr1_fclimweak	Aqua	All	3042	1264	120	0	1.06	0.67	03/ 91/ 05	02/ 70/ 27	05/ 61/ 33	00/ 00/ 00	03/ 84/ 12	0.05	0.03 + 0.16*tau	****** + *******tau	0.01 + 0.21*tau	****** + *******tau	0.2	0.01	0	-999	-999	-999
2	corr1_fclimweak_nocloud	Aqua	All	2876	1072	97	0	1.03	0.69	03/ 91/ 04	03/ 74/ 22	05/ 69/ 25	00/ 00/ 00	03/ 86/ 09	0.05	0.02 + 0.16*tau	****** + *******tau	0.01 + 0.19*tau	****** + *******tau	0.2	0.02	0	-999	-999	-999
2	corr1_fclimstrong	Aqua	All	2392	1065	99	0	1.05	0.68	02/ 93/ 03	02/ 73/ 24	04/ 65/ 30	00/ 00/ 00	02/ 86/ 10	0.05	0.02 + 0.16*tau	****** + *******tau	0.01 + 0.20*tau	****** + *******tau	0.18	0	0	-999	-999	-999
2	corr1_fclimstrong_nocloud	Aqua	All	2246	896	75	0	1.01	0.69	03/ 93/ 03	03/ 78/ 18	05/ 72/ 22	00/ 00/ 00	03/ 89/ 07	0.05	0.02 + 0.16*tau	****** + *******tau	0.02 + 0.16*tau	****** + *******tau	0.18	0	0	-999	-999	-999
2	corr2_fmatchedweak	Aqua	All	3268	1291	112	0	1.03	0.67	04/ 91/ 04	03/ 71/ 25	05/ 70/ 24	00/ 00/ 00	03/ 85/ 10	0.05	0.02 + 0.16*tau	****** + *******tau	0.02 + 0.17*tau	****** + *******tau	0.22	0.04	0.02	-999	-999	-999
2	corr2_fmatchedweak_nocloud	Aqua	All	3103	1096	93	0	1	0.68	04/ 92/ 03	03/ 76/ 19	05/ 77/ 17	00/ 00/ 00	04/ 87/ 07	0.05	0.03 + 0.13*tau	****** + *******tau	0.04 + 0.11*tau	****** + *******tau	0.22	0.04	0.02	-999	-999	-999
2	corr2_fmatchedstrong	Aqua	All	2597	1103	90	0	1.01	0.68	03/ 92/ 03	03/ 74/ 22	06/ 73/ 20	00/ 00/ 00	03/ 87/ 09	0.05	0.02 + 0.17*tau	****** + *******tau	0.02 + 0.16*tau	****** + *******tau	0.2	0.01	0	-999	-999	-999
2	corr2_fmatchedstrong_noclou	Aqua	All	2444	933	75	0	0.98	0.69	03/ 93/ 02	03/ 78/ 17	05/ 80/ 14	00/ 00/ 00	03/ 89/ 06	0.05	0.01 + 0.19*tau	****** + *******tau	0.02 + 0.15*tau	****** + *******tau	0.2	0.01	0	-999	-999	-999
3	raw_nobuddy	Terra	All	5684	2579	109	1	1.47	0.13	06/ 66/ 27	00/ 14/ 84	04/ 12/ 82	100/ 00/ 00	04/ 50/ 45	0.15	0.04 + 0.29*tau	****** + *******tau	-0.02 + 0.71*tau	****** + *******tau	0.41	0.13	0.04	-999	-999	-999
3	raw_nosdcheck	Terra	All	5670	2524	105	1	1.48	0.13	06/ 66/ 26	00/ 15/ 83	04/ 13/ 81	100/ 00/ 00	04/ 50/ 45	0.15	0.06 + 0.20*tau	****** + *******tau	-0.02 + 0.70*tau	****** + *******tau	0.41	0.13	0.04	-999	-999	-999
3	raw	Terra	All	5525	2368	92	1	1.44	0.14	05/ 67/ 26	00/ 15/ 83	05/ 16/ 78	100/ 00/ 00	04/ 51/ 44	0.15	0.04 + 0.25*tau	****** + *******tau	-0.01 + 0.69*tau	****** + *******tau	0.42	0.13	0.02	-999	-999	-999
3	raw_fqa	Terra	All	4363	1026	28	0	1.42	0.21	08/ 75/ 16	00/ 24/ 75	03/ 42/ 53	00/ 00/ 00	06/ 65/ 27	0.1	0.01 + 0.34*tau	****** + *******tau	0.02 + 0.49*tau	****** + *******tau	0.39	0.14	0.03	-999	-999	-999
3	raw_fqa_nocloud	Terra	All	4083	865	31	0	1.39	0.23	08/ 76/ 14	00/ 24/ 74	03/ 32/ 64	00/ 00/ 00	07/ 67/ 25	0.1	0.01 + 0.34*tau	****** + *******tau	0.02 + 0.50*tau	****** + *******tau	0.4	0.15	0.04	-999	-999	-999
3	nocorr_fmatchedweak	Terra	All	4007	864	27	0	1.37	0.25	08/ 77/ 13	00/ 26/ 72	03/ 44/ 51	00/ 00/ 00	07/ 68/ 24	0.1	0.02 + 0.31*tau	****** + *******tau	0.02 + 0.45*tau	****** + *******tau	0.39	0.15	0.04	-999	-999	-999
3	nocorr_fmatchedweak_nocloud	Terra	All	3748	710	27	0	1.32	0.26	08/ 78/ 12	01/ 28/ 70	03/ 44/ 51	00/ 00/ 00	07/ 70/ 22	0.09	0.00 + 0.37*tau	****** + *******tau	0.04 + 0.38*tau	****** + *******tau	0.4	0.16	0.05	-999	-999	-999
3	nocorr_fmatchedstrong	Terra	All	3153	343	16	0	1.11	0.42	10/ 82/ 06	02/ 44/ 53	06/ 50/ 43	00/ 00/ 00	09/ 78/ 11	0.06	0.00 + 0.35*tau	****** + *******tau	0.06 + 0.20*tau	****** + *******tau	0.42	0.18	0.07	-999	-999	-999
3	nocorr_fmatchedstrong_noclo	Terra	All	2852	249	14	0	1.03	0.46	11/ 83/ 05	02/ 51/ 46	07/ 57/ 35	00/ 00/ 00	10/ 80/ 08	0.06	0.00 + 0.35*tau	****** + *******tau	0.06 + 0.18*tau	****** + *******tau	0.44	0.2	0.08	-999	-999	-999
3	nocorr_fclimweak	Terra	All	4058	873	23	0	1.35	0.24	08/ 78/ 12	00/ 28/ 70	04/ 47/ 47	00/ 00/ 00	07/ 69/ 23	0.1	0.04 + 0.21*tau	****** + *******tau	0.04 + 0.39*tau	****** + *******tau	0.39	0.15	0.04	-999	-999	-999
3	nocorr_fclimweak_nocloud	Terra	All	3778	707	24	0	1.3	0.25	09/ 79/ 11	00/ 30/ 68	04/ 45/ 50	00/ 00/ 00	08/ 71/ 20	0.09	0.04 + 0.21*tau	****** + *******tau	0.02 + 0.44*tau	****** + *******tau	0.41	0.17	0.05	-999	-999	-999
3	nocorr_fclimstrong	Terra	All	2795	274	18	0	1.06	0.46	10/ 84/ 05	03/ 50/ 46	05/ 55/ 38	00/ 00/ 00	09/ 81/ 09	0.06	0.03 + 0.23*tau	****** + *******tau	0.05 + 0.21*tau	****** + *******tau	0.43	0.2	0.08	-999	-999	-999
3	nocorr_fclimstrong_nocloud	Terra	All	2471	196	16	0	0.98	0.45	11/ 84/ 03	05/ 55/ 39	06/ 62/ 31	00/ 00/ 00	11/ 82/ 06	0.06	-0.01 + 0.37*tau	****** + *******tau	0.06 + 0.18*tau	****** + *******tau	0.46	0.22	0.09	-999	-999	-999
3	albcorr_fmatchedweak	Terra	All	4086	790	26	0	1.33	0.29	05/ 79/ 14	00/ 33/ 65	03/ 46/ 50	00/ 00/ 00	04/ 72/ 22	0.09	-0.07 + 0.61*tau	****** + *******tau	0.03 + 0.38*tau	****** + *******tau	0.36	0.09	0.03	-999	-999	-999
3	albcorr_fmatchedweak_noclou	Terra	All	3848	620	27	0	1.29	0.31	05/ 81/ 12	01/ 35/ 63	03/ 44/ 51	00/ 00/ 00	05/ 74/ 19	0.08	-0.00 + 0.37*tau	****** + *******tau	0.04 + 0.35*tau	****** + *******tau	0.37	0.1	0.03	-999	-999	-999
3	albcorr_fmatchedstrong	Terra	All	3060	447	17	0	1.14	0.43	05/ 83/ 11	02/ 42/ 55	05/ 47/ 47	00/ 00/ 00	04/ 77/ 17	0.07	-0.00 + 0.34*tau	****** + *******tau	0.05 + 0.23*tau	****** + *******tau	0.29	0.02	0	-999	-999	-999
3	albcorr_fmatchedstrong_nocl	Terra	All	2794	325	14	0	1.05	0.45	05/ 84/ 09	02/ 50/ 46	07/ 57/ 35	00/ 00/ 00	05/ 81/ 13	0.06	-0.04 + 0.46*tau	****** + *******tau	0.05 + 0.19*tau	****** + *******tau	0.29	0.02	0	-999	-999	-999
3	albcorr_fclimweak	Terra	All	4024	912	26	0	1.35	0.3	04/ 79/ 16	00/ 30/ 68	00/ 53/ 46	00/ 00/ 00	03/ 70/ 26	0.09	0.01 + 0.29*tau	****** + *******tau	0.04 + 0.37*tau	****** + *******tau	0.31	0.04	0.01	-999	-999	-999
3	albcorr_fclimweak_nocloud	Terra	All	3781	717	23	0	1.29	0.31	04/ 81/ 14	01/ 35/ 63	00/ 52/ 47	00/ 00/ 00	04/ 73/ 22	0.08	0.04 + 0.18*tau	****** + *******tau	0.05 + 0.33*tau	****** + *******tau	0.33	0.04	0.01	-999	-999	-999
3	albcorr_fclimstrong	Terra	All	2657	420	18	0	1.15	0.47	03/ 83/ 13	02/ 46/ 51	05/ 50/ 44	00/ 00/ 00	03/ 77/ 18	0.06	0.02 + 0.23*tau	****** + *******tau	0.04 + 0.24*tau	****** + *******tau	0.26	0.01	0	-999	-999	-999
3	albcorr_fclimstrong_nocloud	Terra	All	2369	302	17	0	1.07	0.49	03/ 85/ 10	02/ 54/ 42	05/ 52/ 41	00/ 00/ 00	03/ 81/ 14	0.06	0.01 + 0.28*tau	****** + *******tau	0.03 + 0.24*tau	****** + *******tau	0.27	0.01	0	-999	-999	-999
3	corr1_fclimweak	Terra	All	4357	621	9	0	1.08	0.32	04/ 78/ 17	03/ 39/ 57	00/ 88/ 11	00/ 00/ 00	04/ 73/ 22	0.07	0.01 + 0.27*tau	****** + *******tau	0.05 + 0.26*tau	****** + *******tau	0.29	0.04	0.01	-999	-999	-999
3	corr1_fclimweak_nocloud	Terra	All	4034	498	8	0	1.04	0.34	04/ 80/ 14	04/ 39/ 55	00/100/ 00	00/ 00/ 00	04/ 76/ 19	0.07	0.02 + 0.25*tau	****** + *******tau	0.08 + 0.16*tau	****** + *******tau	0.31	0.04	0.01	-999	-999	-999
3	corr1_fclimstrong	Terra	All	2827	271	5	0	0.92	0.46	03/ 83/ 13	07/ 58/ 34	20/ 60/ 20	00/ 00/ 00	03/ 80/ 15	0.05	-0.03 + 0.38*tau	****** + *******tau	0.07 + 0.10*tau	****** + *******tau	0.25	0.01	0	-999	-999	-999
3	corr1_fclimstrong_nocloud	Terra	All	2495	194	7	0	0.86	0.47	03/ 85/ 10	09/ 60/ 30	14/ 85/ 00	00/ 00/ 00	04/ 83/ 11	0.05	-0.03 + 0.39*tau	****** + *******tau	0.06 + 0.14*tau	****** + *******tau	0.25	0.01	0	-999	-999	-999
3	corr2_fmatchedweak	Terra	All	4373	548	7	0	1.07	0.3	05/ 79/ 15	03/ 41/ 55	00/100/ 00	00/ 00/ 00	05/ 75/ 19	0.07	-0.01 + 0.37*tau	****** + *******tau	0.04 + 0.31*tau	****** + *******tau	0.34	0.08	0.03	-999	-999	-999
3	corr2_fmatchedweak_nocloud	Terra	All	4062	445	8	0	1.04	0.32	05/ 80/ 13	03/ 42/ 54	00/ 87/ 12	00/ 00/ 00	05/ 77/ 17	0.07	-0.03 + 0.45*tau	****** + *******tau	0.06 + 0.22*tau	****** + *******tau	0.35	0.09	0.03	-999	-999	-999
3	corr2_fmatchedstrong	Terra	All	3232	300	3	0	0.89	0.4	05/ 83/ 11	06/ 54/ 38	33/ 66/ 00	00/ 00/ 00	05/ 80/ 14	0.05	-0.04 + 0.47*tau	****** + *******tau	0.05 + 0.19*tau	****** + *******tau	0.27	0.02	0	-999	-999	-999
3	corr2_fmatchedstrong_noclou	Terra	All	2920	218	5	0	0.83	0.44	05/ 84/ 09	07/ 60/ 31	20/ 80/ 00	00/ 00/ 00	05/ 83/ 11	0.05	-0.07 + 0.57*tau	****** + *******tau	0.07 + 0.11*tau	****** + *******tau	0.28	0.02	0	-999	-999	-999
3	raw_nobuddy	Aqua	All	5801	2628	127	2	1.47	0.11	05/ 69/ 24	00/ 14/ 84	03/ 11/ 85	00/ 50/ 50	04/ 51/ 44	0.15	0.03 + 0.31*tau	****** + *******tau	-0.02 + 0.72*tau	****** + *******tau	0.38	0.08	0.02	-999	-999	-999
3	raw_nosdcheck	Aqua	All	5771	2548	115	2	1.45	0.12	05/ 69/ 24	00/ 15/ 84	04/ 11/ 84	00/ 50/ 50	04/ 52/ 43	0.15	0.03 + 0.32*tau	****** + *******tau	-0.03 + 0.73*tau	****** + *******tau	0.38	0.08	0.02	-999	-999	-999
3	raw	Aqua	All	5551	2376	91	1	1.51	0.12	05/ 70/ 24	00/ 15/ 83	04/ 12/ 83	00/100/ 00	03/ 53/ 42	0.15	0.02 + 0.36*tau	****** + *******tau	-0.01 + 0.67*tau	****** + *******tau	0.38	0.08	0.01	-999	-999	-999
3	raw_fqa	Aqua	All	4260	928	26	0	1.27	0.22	07/ 77/ 15	01/ 24/ 74	03/ 23/ 73	00/ 00/ 00	06/ 67/ 25	0.1	-0.04 + 0.53*tau	****** + *******tau	0.03 + 0.46*tau	****** + *******tau	0.35	0.1	0.02	-999	-999	-999
3	raw_fqa_nocloud	Aqua	All	3923	748	24	0	1.24	0.2	07/ 78/ 13	02/ 25/ 72	04/ 20/ 75	00/ 00/ 00	06/ 69/ 23	0.1	-0.03 + 0.52*tau	****** + *******tau	0.02 + 0.50*tau	****** + *******tau	0.37	0.12	0.03	-999	-999	-999
3	nocorr_fmatchedweak	Aqua	All	3921	802	22	0	1.24	0.24	07/ 79/ 12	01/ 26/ 71	04/ 27/ 68	00/ 00/ 00	06/ 70/ 23	0.09	-0.03 + 0.50*tau	****** + *******tau	0.02 + 0.47*tau	****** + *******tau	0.36	0.11	0.03	-999	-999	-999
3	nocorr_fmatchedweak_nocloud	Aqua	All	3611	632	18	0	1.2	0.23	08/ 80/ 11	02/ 27/ 70	05/ 27/ 66	00/ 00/ 00	07/ 72/ 20	0.09	-0.02 + 0.50*tau	****** + *******tau	-0.00 + 0.53*tau	****** + *******tau	0.38	0.13	0.03	-999	-999	-999
3	nocorr_fmatchedstrong	Aqua	All	3150	331	12	0	0.95	0.29	10/ 83/ 06	02/ 44/ 53	08/ 41/ 50	00/ 00/ 00	09/ 79/ 11	0.06	0.01 + 0.36*tau	****** + *******tau	0.03 + 0.30*tau	****** + *******tau	0.39	0.14	0.05	-999	-999	-999
3	nocorr_fmatchedstrong_noclo	Aqua	All	2846	229	8	0	0.87	0.25	10/ 84/ 05	03/ 49/ 47	12/ 37/ 50	00/ 00/ 00	10/ 81/ 08	0.06	0.00 + 0.40*tau	****** + *******tau	0.03 + 0.32*tau	****** + *******tau	0.41	0.16	0.07	-999	-999	-999
3	nocorr_fclimweak	Aqua	All	4025	809	21	0	1.15	0.24	07/ 80/ 12	02/ 27/ 70	04/ 33/ 61	00/ 00/ 00	06/ 71/ 22	0.09	-0.05 + 0.57*tau	****** + *******tau	0.02 + 0.46*tau	****** + *******tau	0.36	0.11	0.03	-999	-999	-999
3	nocorr_fclimweak_nocloud	Aqua	All	3710	643	18	0	1.11	0.21	08/ 80/ 11	02/ 28/ 68	05/ 33/ 61	00/ 00/ 00	07/ 72/ 19	0.09	-0.04 + 0.54*tau	****** + *******tau	0.00 + 0.52*tau	****** + *******tau	0.37	0.13	0.04	-999	-999	-999
3	nocorr_fclimstrong	Aqua	All	2826	256	11	0	0.9	0.28	10/ 84/ 05	03/ 50/ 45	09/ 27/ 63	00/ 00/ 00	09/ 81/ 08	0.06	-0.02 + 0.47*tau	****** + *******tau	0.01 + 0.36*tau	****** + *******tau	0.39	0.15	0.06	-999	-999	-999
3	nocorr_fclimstrong_nocloud	Aqua	All	2494	179	8	0	0.8	0.26	11/ 84/ 04	06/ 54/ 39	12/ 25/ 62	00/ 00/ 00	10/ 82/ 06	0.05	-0.07 + 0.64*tau	****** + *******tau	-0.00 + 0.41*tau	****** + *******tau	0.42	0.17	0.08	-999	-999	-999
3	albcorr_fmatchedweak	Aqua	All	3966	761	21	0	1.19	0.27	04/ 81/ 13	01/ 32/ 65	04/ 28/ 66	00/ 00/ 00	04/ 73/ 22	0.08	-0.02 + 0.45*tau	****** + *******tau	-0.00 + 0.50*tau	****** + *******tau	0.32	0.07	0.03	-999	-999	-999
3	albcorr_fmatchedweak_noclou	Aqua	All	3671	580	17	0	1.13	0.25	04/ 83/ 11	02/ 36/ 61	05/ 29/ 64	00/ 00/ 00	04/ 76/ 18	0.08	-0.03 + 0.48*tau	****** + *******tau	-0.01 + 0.52*tau	****** + *******tau	0.34	0.08	0.03	-999	-999	-999
3	albcorr_fmatchedstrong	Aqua	All	3037	449	14	0	1	0.31	03/ 84/ 11	02/ 41/ 55	07/ 42/ 50	00/ 00/ 00	03/ 78/ 17	0.06	-0.06 + 0.57*tau	****** + *******tau	0.00 + 0.40*tau	****** + *******tau	0.26	0.01	0	-999	-999	-999
3	albcorr_fmatchedstrong_nocl	Aqua	All	2763	316	9	0	0.91	0.28	04/ 86/ 09	03/ 48/ 48	11/ 44/ 44	00/ 00/ 00	04/ 82/ 13	0.06	-0.07 + 0.60*tau	****** + *******tau	-0.01 + 0.43*tau	****** + *******tau	0.27	0.02	0	-999	-999	-999
3	albcorr_fclimweak	Aqua	All	3974	865	24	0	1.23	0.29	03/ 80/ 16	01/ 32/ 66	04/ 41/ 54	00/ 00/ 00	02/ 71/ 25	0.08	-0.06 + 0.59*tau	****** + *******tau	0.03 + 0.39*tau	****** + *******tau	0.29	0.03	0	-999	-999	-999
3	albcorr_fclimweak_nocloud	Aqua	All	3689	667	21	0	1.18	0.27	03/ 82/ 13	01/ 35/ 62	04/ 42/ 52	00/ 00/ 00	03/ 75/ 21	0.08	-0.02 + 0.46*tau	****** + *******tau	0.01 + 0.45*tau	****** + *******tau	0.29	0.03	0	-999	-999	-999
3	albcorr_fclimstrong	Aqua	All	2695	392	13	0	0.99	0.31	03/ 84/ 12	02/ 46/ 50	07/ 30/ 61	00/ 00/ 00	03/ 79/ 17	0.06	-0.07 + 0.61*tau	****** + *******tau	0.00 + 0.39*tau	****** + *******tau	0.24	0	0	-999	-999	-999
3	albcorr_fclimstrong_nocloud	Aqua	All	2393	287	8	0	0.89	0.3	03/ 86/ 09	04/ 52/ 43	12/ 25/ 62	00/ 00/ 00	03/ 82/ 13	0.05	-0.07 + 0.60*tau	****** + *******tau	-0.03 + 0.48*tau	****** + *******tau	0.24	0	0	-999	-999	-999
3	corr1_fclimweak	Aqua	All	4277	602	11	0	0.92	0.28	03/ 79/ 16	03/ 41/ 55	18/ 27/ 54	00/ 00/ 00	03/ 75/ 21	0.07	-0.08 + 0.62*tau	****** + *******tau	0.03 + 0.36*tau	****** + *******tau	0.26	0.03	0	-999	-999	-999
3	corr1_fclimweak_nocloud	Aqua	All	3941	450	9	0	0.87	0.25	03/ 82/ 14	04/ 42/ 53	11/ 33/ 55	00/ 00/ 00	03/ 78/ 18	0.06	-0.09 + 0.65*tau	****** + *******tau	0.01 + 0.41*tau	****** + *******tau	0.28	0.03	0	-999	-999	-999
3	corr1_fclimstrong	Aqua	All	2857	249	7	0	0.76	0.27	03/ 83/ 12	06/ 60/ 33	00/ 42/ 57	00/ 00/ 00	03/ 81/ 14	0.05	-0.07 + 0.56*tau	****** + *******tau	0.03 + 0.27*tau	****** + *******tau	0.23	0	0	-999	-999	-999
3	corr1_fclimstrong_nocloud	Aqua	All	2520	172	4	0	0.67	0.26	03/ 86/ 09	10/ 61/ 28	00/ 75/ 25	00/ 00/ 00	04/ 84/ 11	0.05	-0.12 + 0.75*tau	****** + *******tau	0.03 + 0.30*tau	****** + *******tau	0.23	0	0	-999	-999	-999
3	corr2_fmatchedweak	Aqua	All	4247	528	9	0	0.94	0.26	04/ 80/ 14	04/ 42/ 53	11/ 33/ 55	00/ 00/ 00	04/ 76/ 18	0.07	-0.10 + 0.67*tau	****** + *******tau	0.03 + 0.35*tau	****** + *******tau	0.3	0.06	0.03	-999	-999	-999
3	corr2_fmatchedweak_nocloud	Aqua	All	3891	395	9	0	0.9	0.24	04/ 82/ 12	04/ 43/ 52	11/ 44/ 44	00/ 00/ 00	04/ 79/ 16	0.06	-0.09 + 0.65*tau	****** + *******tau	0.04 + 0.33*tau	****** + *******tau	0.32	0.07	0.03	-999	-999	-999
3	corr2_fmatchedstrong	Aqua	All	3227	286	5	0	0.77	0.28	04/ 83/ 12	05/ 58/ 35	00/ 40/ 60	00/ 00/ 00	04/ 81/ 14	0.05	-0.10 + 0.68*tau	****** + *******tau	-0.02 + 0.47*tau	****** + *******tau	0.25	0.01	0	-999	-999	-999
3	corr2_fmatchedstrong_noclou	Aqua	All	2911	190	3	0	0.69	0.24	04/ 85/ 09	06/ 61/ 31	00/ 66/ 33	00/ 00/ 00	04/ 84/ 10	0.05	-0.12 + 0.78*tau	****** + *******tau	0.02 + 0.35*tau	****** + *******tau	0.26	0.02	0	-999	-999	-999
4	raw_nobuddy	Terra	All	596	412	59	12	0.85	0.55	35/ 61/ 03	20/ 65/ 14	13/ 67/ 18	08/ 58/ 33	28/ 63/ 08	0.08	0.04 + 0.23*tau	****** + *******tau	0.08 + 0.12*tau	****** + *******tau	0.37	0.07	0.02	0.651	0.323	0.323
4	raw_nosdcheck	Terra	All	584	405	57	11	0.85	0.54	36/ 60/ 03	20/ 65/ 13	12/ 70/ 17	09/ 63/ 27	29/ 62/ 08	0.08	0.03 + 0.25*tau	****** + *******tau	0.07 + 0.12*tau	****** + *******tau	0.37	0.07	0.02	0.42	0.311	0.311
4	raw	Terra	All	490	375	48	11	0.83	0.55	41/ 55/ 02	22/ 65/ 12	12/ 70/ 16	09/ 63/ 27	31/ 60/ 07	0.08	0.03 + 0.26*tau	****** + *******tau	0.09 + 0.07*tau	****** + *******tau	0.4	0.08	0.01	0.409	0.231	0.231
4	raw_fqa	Terra	All	347	133	28	6	0.82	0.61	60/ 38/ 01	31/ 62/ 06	14/ 67/ 17	00/ 66/ 33	49/ 46/ 03	0.07	0.07 + 0.21*tau	****** + *******tau	0.08 + 0.11*tau	****** + *******tau	0.38	0.08	0.02	-999	-999	-999
4	raw_fqa_nocloud	Terra	All	321	103	23	7	0.82	0.65	62/ 35/ 01	27/ 65/ 07	17/ 65/ 17	00/ 57/ 42	51/ 44/ 04	0.08	0.08 + 0.20*tau	****** + *******tau	0.08 + 0.14*tau	****** + *******tau	0.38	0.08	0.03	-999	-999	-999
4	nocorr_fmatchedweak	Terra	All	347	135	25	6	0.81	0.62	60/ 38/ 01	31/ 62/ 05	12/ 68/ 20	00/ 50/ 50	49/ 46/ 03	0.07	0.07 + 0.21*tau	****** + *******tau	0.08 + 0.12*tau	****** + *******tau	0.38	0.08	0.02	-999	-999	-999
4	nocorr_fmatchedweak_nocloud	Terra	All	321	107	18	7	0.81	0.64	62/ 35/ 01	27/ 65/ 07	11/ 66/ 22	00/ 57/ 42	51/ 44/ 04	0.08	0.09 + 0.18*tau	****** + *******tau	0.08 + 0.13*tau	****** + *******tau	0.38	0.08	0.03	-999	-999	-999
4	nocorr_fmatchedstrong	Terra	All	330	86	12	4	0.79	0.67	72/ 26/ 00	38/ 54/ 06	08/ 83/ 08	00/ 25/ 75	63/ 34/ 02	0.08	0.10 + 0.20*tau	****** + *******tau	0.09 + 0.12*tau	****** + *******tau	0.37	0.08	0.02	-999	-999	-999
4	nocorr_fmatchedstrong_noclo	Terra	All	286	63	10	3	0.78	0.66	74/ 25/ 00	41/ 57/ 01	10/ 80/ 10	00/ 33/ 66	66/ 32/ 01	0.09	0.09 + 0.25*tau	****** + *******tau	0.09 + 0.10*tau	****** + *******tau	0.37	0.09	0.04	-999	-999	-999
4	nocorr_fclimweak	Terra	All	342	134	24	8	0.79	0.63	61/ 36/ 01	35/ 58/ 05	16/ 75/ 08	00/ 50/ 50	51/ 44/ 03	0.07	0.07 + 0.22*tau	****** + *******tau	0.11 + 0.07*tau	****** + *******tau	0.37	0.07	0.02	-999	-999	-999
4	nocorr_fclimweak_nocloud	Terra	All	325	101	20	8	0.79	0.68	62/ 36/ 01	31/ 62/ 05	20/ 70/ 10	00/ 37/ 62	52/ 43/ 03	0.08	0.07 + 0.23*tau	****** + *******tau	0.08 + 0.14*tau	****** + *******tau	0.37	0.08	0.03	-999	-999	-999
4	nocorr_fclimstrong	Terra	All	319	72	15	6	0.82	0.71	73/ 26/ 00	36/ 56/ 06	26/ 73/ 00	00/ 66/ 33	64/ 33/ 01	0.08	0.12 + 0.12*tau	****** + *******tau	0.12 + 0.02*tau	****** + *******tau	0.37	0.08	0.02	-999	-999	-999
4	nocorr_fclimstrong_nocloud	Terra	All	265	53	11	5	0.78	0.7	74/ 24/ 00	43/ 56/ 00	36/ 63/ 00	00/ 40/ 60	67/ 31/ 01	0.09	0.10 + 0.21*tau	****** + *******tau	0.13 + 0.03*tau	****** + *******tau	0.37	0.11	0.04	-999	-999	-999
4	albcorr_fmatchedweak	Terra	All	325	156	25	6	0.82	0.64	49/ 49/ 01	25/ 69/ 05	12/ 68/ 20	00/ 50/ 50	39/ 56/ 04	0.06	0.03 + 0.31*tau	****** + *******tau	0.08 + 0.09*tau	****** + *******tau	0.31	0.03	0	-999	-999	-999
4	albcorr_fmatchedweak_noclou	Terra	All	307	124	19	7	0.82	0.65	51/ 47/ 00	25/ 66/ 08	10/ 68/ 21	00/ 57/ 42	42/ 53/ 04	0.06	0.06 + 0.25*tau	****** + *******tau	0.05 + 0.19*tau	****** + *******tau	0.32	0.04	0.01	-999	-999	-999
4	albcorr_fmatchedstrong	Terra	All	299	121	12	4	0.8	0.65	50/ 49/ 00	28/ 61/ 09	08/ 83/ 08	00/ 25/ 75	42/ 53/ 03	0.06	0.05 + 0.28*tau	****** + *******tau	0.10 + 0.05*tau	****** + *******tau	0.28	0	0	-999	-999	-999
4	albcorr_fmatchedstrong_nocl	Terra	All	271	77	10	3	0.8	0.65	54/ 45/ 00	28/ 66/ 05	10/ 80/ 10	00/ 33/ 66	47/ 50/ 02	0.06	0.09 + 0.19*tau	****** + *******tau	0.07 + 0.14*tau	****** + *******tau	0.28	0.02	0	-999	-999	-999
4	albcorr_fclimweak	Terra	All	316	161	25	8	0.83	0.65	44/ 54/ 00	24/ 68/ 06	16/ 64/ 20	00/ 50/ 50	36/ 59/ 04	0.06	0.04 + 0.27*tau	****** + *******tau	0.09 + 0.07*tau	****** + *******tau	0.29	0.01	0	-999	-999	-999
4	albcorr_fclimweak_nocloud	Terra	All	304	125	20	8	0.83	0.69	47/ 51/ 00	25/ 68/ 06	20/ 60/ 20	00/ 25/ 75	39/ 56/ 04	0.06	0.05 + 0.26*tau	****** + *******tau	0.05 + 0.18*tau	****** + *******tau	0.28	0.01	0	-999	-999	-999
4	albcorr_fclimstrong	Terra	All	289	101	17	6	0.85	0.71	48/ 51/ 00	29/ 62/ 07	17/ 76/ 05	00/ 66/ 33	41/ 55/ 02	0.06	0.08 + 0.17*tau	****** + *******tau	0.09 + 0.07*tau	****** + *******tau	0.27	0	0	-999	-999	-999
4	albcorr_fclimstrong_nocloud	Terra	All	247	68	12	6	0.82	0.7	51/ 48/ 00	27/ 69/ 02	25/ 66/ 08	00/ 50/ 50	44/ 53/ 02	0.06	0.07 + 0.20*tau	****** + *******tau	0.08 + 0.10*tau	****** + *******tau	0.26	0.01	0	-999	-999	-999
4	corr1_fclimweak	Terra	All	304	159	30	11	0.91	0.59	44/ 53/ 01	17/ 70/ 11	10/ 70/ 20	09/ 09/ 81	33/ 59/ 07	0.06	0.03 + 0.27*tau	****** + *******tau	0.07 + 0.11*tau	****** + *******tau	0.3	0.01	0	0.629	0.303	0.303
4	corr1_fclimweak_nocloud	Terra	All	293	124	24	11	0.9	0.63	45/ 53/ 01	19/ 69/ 11	12/ 66/ 20	09/ 18/ 72	35/ 57/ 06	0.06	0.03 + 0.31*tau	****** + *******tau	0.07 + 0.12*tau	****** + *******tau	0.3	0.01	0	0.755	0.317	0.317
4	corr1_fclimstrong	Terra	All	280	106	18	8	0.91	0.64	47/ 52/ 00	16/ 69/ 13	11/ 72/ 16	00/ 50/ 50	37/ 57/ 05	0.06	0.06 + 0.22*tau	****** + *******tau	0.05 + 0.14*tau	****** + *******tau	0.27	0	0	-999	-999	-999
4	corr1_fclimstrong_nocloud	Terra	All	243	69	13	7	0.88	0.65	51/ 48/ 00	18/ 73/ 07	15/ 69/ 15	00/ 42/ 57	41/ 54/ 03	0.06	0.07 + 0.23*tau	****** + *******tau	0.07 + 0.10*tau	****** + *******tau	0.27	0.01	0	-999	-999	-999
4	corr2_fmatchedweak	Terra	All	315	154	25	11	0.88	0.56	47/ 51/ 01	20/ 66/ 12	08/ 72/ 20	09/ 36/ 54	36/ 56/ 06	0.06	0.04 + 0.26*tau	****** + *******tau	0.04 + 0.19*tau	****** + *******tau	0.33	0.04	0	0.637	0.409	0.409
4	corr2_fmatchedweak_nocloud	Terra	All	299	115	24	11	0.89	0.61	50/ 48/ 01	17/ 70/ 12	12/ 62/ 25	09/ 36/ 54	38/ 54/ 06	0.06	0.06 + 0.24*tau	****** + *******tau	0.05 + 0.15*tau	****** + *******tau	0.33	0.04	0.01	0.737	0.354	0.354
4	corr2_fmatchedstrong	Terra	All	293	116	16	6	0.87	0.64	50/ 49/ 00	19/ 64/ 15	18/ 81/ 00	00/ 33/ 66	40/ 54/ 05	0.06	0.03 + 0.33*tau	****** + *******tau	0.05 + 0.16*tau	****** + *******tau	0.3	0	0	-999	-999	-999
4	corr2_fmatchedstrong_noclou	Terra	All	266	77	14	4	0.86	0.69	54/ 44/ 00	20/ 66/ 12	21/ 78/ 00	00/ 25/ 75	45/ 50/ 03	0.06	0.09 + 0.17*tau	****** + *******tau	0.07 + 0.13*tau	****** + *******tau	0.29	0.02	0	-999	-999	-999
4	raw_nobuddy	Aqua	All	467	453	68	9	0.91	0.58	24/ 72/ 03	15/ 62/ 21	05/ 66/ 27	00/ 44/ 55	18/ 67/ 13	0.08	0.03 + 0.22*tau	****** + *******tau	0.07 + 0.11*tau	****** + *******tau	0.41	0.08	0.02	-999	-999	-999
4	raw_nosdcheck	Aqua	All	462	433	66	9	0.91	0.58	25/ 71/ 03	16/ 64/ 19	04/ 63/ 31	00/ 44/ 55	19/ 67/ 12	0.08	0.03 + 0.22*tau	****** + *******tau	0.08 + 0.10*tau	****** + *******tau	0.41	0.08	0.02	-999	-999	-999
4	raw	Aqua	All	379	380	56	8	0.91	0.61	29/ 67/ 02	16/ 64/ 19	05/ 66/ 28	00/ 62/ 37	21/ 66/ 12	0.08	0.03 + 0.24*tau	****** + *******tau	0.08 + 0.08*tau	****** + *******tau	0.42	0.08	0	-999	-999	-999
4	raw_fqa	Aqua	All	278	121	26	3	0.86	0.65	40/ 57/ 02	20/ 70/ 09	11/ 76/ 11	00/ 66/ 33	32/ 62/ 04	0.07	0.04 + 0.24*tau	****** + *******tau	0.03 + 0.21*tau	****** + *******tau	0.36	0.09	0.02	-999	-999	-999
4	raw_fqa_nocloud	Aqua	All	239	84	23	3	0.86	0.7	41/ 56/ 01	17/ 77/ 04	13/ 69/ 17	00/ 66/ 33	33/ 62/ 03	0.07	0.04 + 0.22*tau	****** + *******tau	0.03 + 0.19*tau	****** + *******tau	0.37	0.12	0.02	-999	-999	-999
4	nocorr_fmatchedweak	Aqua	All	277	123	24	2	0.83	0.7	40/ 57/ 02	21/ 69/ 08	12/ 75/ 12	00/ 50/ 50	33/ 61/ 04	0.07	0.05 + 0.20*tau	****** + *******tau	0.04 + 0.20*tau	****** + *******tau	0.36	0.09	0.02	-999	-999	-999
4	nocorr_fmatchedweak_nocloud	Aqua	All	238	86	21	2	0.83	0.76	41/ 56/ 01	17/ 76/ 05	14/ 76/ 09	00/ 50/ 50	33/ 62/ 03	0.07	0.06 + 0.16*tau	****** + *******tau	0.01 + 0.27*tau	****** + *******tau	0.37	0.12	0.02	-999	-999	-999
4	nocorr_fmatchedstrong	Aqua	All	259	95	19	1	0.81	0.73	52/ 46/ 01	20/ 73/ 06	15/ 73/ 10	00/ 00/100	41/ 54/ 03	0.07	0.06 + 0.21*tau	****** + *******tau	0.03 + 0.24*tau	****** + *******tau	0.36	0.11	0.02	-999	-999	-999
4	nocorr_fmatchedstrong_noclo	Aqua	All	214	56	17	1	0.78	0.76	53/ 46/ 00	25/ 71/ 03	17/ 70/ 11	00/ 00/100	45/ 52/ 02	0.07	0.03 + 0.33*tau	****** + *******tau	0.03 + 0.26*tau	****** + *******tau	0.37	0.14	0.03	-999	-999	-999
4	nocorr_fclimweak	Aqua	All	274	119	26	3	0.84	0.67	39/ 58/ 02	23/ 68/ 08	11/ 80/ 07	00/ 66/ 33	33/ 62/ 04	0.07	0.06 + 0.18*tau	****** + *******tau	0.07 + 0.11*tau	****** + *******tau	0.35	0.09	0.01	-999	-999	-999
4	nocorr_fclimweak_nocloud	Aqua	All	234	83	21	3	0.84	0.73	41/ 56/ 01	20/ 74/ 04	14/ 71/ 14	00/ 66/ 33	34/ 61/ 03	0.07	0.05 + 0.20*tau	****** + *******tau	0.06 + 0.11*tau	****** + *******tau	0.36	0.12	0.02	-999	-999	-999
4	nocorr_fclimstrong	Aqua	All	250	81	20	3	0.86	0.7	53/ 45/ 01	20/ 70/ 08	15/ 60/ 25	00/ 66/ 33	43/ 52/ 04	0.08	0.07 + 0.19*tau	****** + *******tau	0.04 + 0.20*tau	****** + *******tau	0.36	0.11	0.02	-999	-999	-999
4	nocorr_fclimstrong_nocloud	Aqua	All	201	48	16	3	0.85	0.72	55/ 44/ 00	22/ 70/ 06	12/ 68/ 18	00/ 66/ 33	46/ 50/ 02	0.08	0.05 + 0.27*tau	****** + *******tau	0.05 + 0.15*tau	****** + *******tau	0.37	0.14	0.02	-999	-999	-999
4	albcorr_fmatchedweak	Aqua	All	253	145	26	2	0.84	0.7	31/ 66/ 01	17/ 71/ 11	11/ 73/ 15	00/ 50/ 50	25/ 68/ 06	0.06	0.04 + 0.21*tau	****** + *******tau	0.03 + 0.21*tau	****** + *******tau	0.31	0.03	0	-999	-999	-999
4	albcorr_fmatchedweak_noclou	Aqua	All	225	99	22	2	0.84	0.75	30/ 68/ 00	16/ 76/ 07	13/ 77/ 09	00/ 50/ 50	25/ 71/ 03	0.06	0.05 + 0.19*tau	****** + *******tau	0.02 + 0.21*tau	****** + *******tau	0.32	0.03	0	-999	-999	-999
4	albcorr_fmatchedstrong	Aqua	All	230	129	19	1	0.82	0.69	31/ 66/ 01	20/ 69/ 10	15/ 73/ 10	00/ 00/100	26/ 68/ 05	0.06	-0.00 + 0.35*tau	****** + *******tau	0.03 + 0.22*tau	****** + *******tau	0.3	0.01	0	-999	-999	-999
4	albcorr_fmatchedstrong_nocl	Aqua	All	196	75	17	1	0.8	0.76	32/ 67/ 00	16/ 77/ 06	17/ 70/ 11	00/ 00/100	26/ 69/ 03	0.06	-0.00 + 0.37*tau	****** + *******tau	0.01 + 0.27*tau	****** + *******tau	0.31	0.01	0	-999	-999	-999
4	albcorr_fclimweak	Aqua	All	245	147	27	3	0.88	0.69	25/ 71/ 02	16/ 70/ 12	11/ 66/ 22	00/ 66/ 33	21/ 70/ 07	0.06	0.05 + 0.19*tau	****** + *******tau	0.05 + 0.12*tau	****** + *******tau	0.3	0.01	0	-999	-999	-999
4	albcorr_fclimweak_nocloud	Aqua	All	219	96	25	3	0.87	0.72	26/ 69/ 03	16/ 77/ 06	12/ 68/ 20	00/ 66/ 33	22/ 71/ 05	0.06	0.06 + 0.14*tau	****** + *******tau	0.04 + 0.15*tau	****** + *******tau	0.31	0.01	0	-999	-999	-999
4	albcorr_fclimstrong	Aqua	All	210	116	22	3	0.9	0.71	26/ 70/ 02	14/ 75/ 10	13/ 45/ 40	00/ 66/ 33	21/ 70/ 07	0.06	0.04 + 0.20*tau	****** + *******tau	0.05 + 0.13*tau	****** + *******tau	0.29	0.01	0	-999	-999	-999
4	albcorr_fclimstrong_nocloud	Aqua	All	179	74	17	3	0.9	0.74	29/ 69/ 01	13/ 78/ 08	11/ 64/ 23	00/ 66/ 33	23/ 71/ 05	0.06	0.06 + 0.15*tau	****** + *******tau	0.02 + 0.20*tau	****** + *******tau	0.3	0.01	0	-999	-999	-999
4	corr1_fclimweak	Aqua	All	245	147	27	3	0.88	0.69	25/ 71/ 02	16/ 70/ 12	11/ 66/ 22	00/ 66/ 33	21/ 70/ 07	0.06	0.05 + 0.19*tau	****** + *******tau	0.05 + 0.12*tau	****** + *******tau	0.3	0.01	0	-999	-999	-999
4	corr1_fclimweak_nocloud	Aqua	All	219	96	25	3	0.87	0.72	26/ 69/ 03	16/ 77/ 06	12/ 68/ 20	00/ 66/ 33	22/ 71/ 05	0.06	0.06 + 0.14*tau	****** + *******tau	0.04 + 0.15*tau	****** + *******tau	0.31	0.01	0	-999	-999	-999
4	corr1_fclimstrong	Aqua	All	210	116	22	3	0.9	0.71	26/ 70/ 02	14/ 75/ 10	13/ 45/ 40	00/ 66/ 33	21/ 70/ 07	0.06	0.04 + 0.20*tau	****** + *******tau	0.05 + 0.13*tau	****** + *******tau	0.29	0.01	0	-999	-999	-999
4	corr1_fclimstrong_nocloud	Aqua	All	179	74	17	3	0.9	0.74	29/ 69/ 01	13/ 78/ 08	11/ 64/ 23	00/ 66/ 33	23/ 71/ 05	0.06	0.06 + 0.15*tau	****** + *******tau	0.02 + 0.20*tau	****** + *******tau	0.3	0.01	0	-999	-999	-999
4	corr2_fmatchedweak	Aqua	All	253	145	26	2	0.84	0.7	31/ 66/ 01	17/ 71/ 11	11/ 73/ 15	00/ 50/ 50	25/ 68/ 06	0.06	0.04 + 0.21*tau	****** + *******tau	0.03 + 0.21*tau	****** + *******tau	0.31	0.03	0	-999	-999	-999
4	corr2_fmatchedweak_nocloud	Aqua	All	225	99	22	2	0.84	0.75	30/ 68/ 00	16/ 76/ 07	13/ 77/ 09	00/ 50/ 50	25/ 71/ 03	0.06	0.05 + 0.19*tau	****** + *******tau	0.02 + 0.21*tau	****** + *******tau	0.32	0.03	0	-999	-999	-999
4	corr2_fmatchedstrong	Aqua	All	230	129	19	1	0.82	0.69	31/ 66/ 01	20/ 69/ 10	15/ 73/ 10	00/ 00/100	26/ 68/ 05	0.06	-0.00 + 0.35*tau	****** + *******tau	0.03 + 0.22*tau	****** + *******tau	0.3	0.01	0	-999	-999	-999
4	corr2_fmatchedstrong_noclou	Aqua	All	196	75	17	1	0.8	0.76	32/ 67/ 00	16/ 77/ 06	17/ 70/ 11	00/ 00/100	26/ 69/ 03	0.06	-0.00 + 0.37*tau	****** + *******tau	0.01 + 0.27*tau	****** + *******tau	0.31	0.01	0	-999	-999	-999
5	raw_nobuddy	Terra	All	1515	366	180	106	1.01	0.75	29/ 66/ 04	04/ 72/ 22	03/ 66/ 30	00/ 50/ 50	21/ 66/ 11	0.07	0.01 + 0.26*tau	0.57 + -0.01*tau	0.03 + 0.16*tau	-0.53 + 0.49*tau	0.3	0.1	0.04	0.783	0.402	0.603
5	raw_nosdcheck	Terra	All	1517	352	181	106	1.01	0.74	29/ 67/ 03	05/ 73/ 21	03/ 65/ 30	00/ 50/ 50	21/ 67/ 11	0.07	0.02 + 0.24*tau	0.55 + 0.00*tau	0.03 + 0.17*tau	-0.57 + 0.51*tau	0.29	0.1	0.04	0.805	0.408	0.617
5	raw	Terra	All	1360	337	176	102	1.01	0.74	25/ 71/ 03	05/ 74/ 19	03/ 65/ 30	00/ 50/ 49	18/ 70/ 11	0.07	0.01 + 0.26*tau	0.51 + 0.00*tau	0.03 + 0.16*tau	-0.51 + 0.48*tau	0.3	0.09	0.02	0.756	0.396	0.588
5	raw_fqa	Terra	All	1060	226	141	86	1.01	0.78	30/ 68/ 01	08/ 80/ 11	03/ 67/ 29	04/ 43/ 52	23/ 68/ 08	0.07	0.01 + 0.25*tau	0.42 + 0.04*tau	0.03 + 0.15*tau	-0.44 + 0.45*tau	0.26	0.09	0.02	0.758	0.359	0.576
5	raw_fqa_nocloud	Terra	All	977	208	138	77	0.99	0.78	34/ 64/ 01	12/ 79/ 08	03/ 68/ 28	03/ 42/ 53	26/ 65/ 07	0.07	0.01 + 0.26*tau	0.38 + 0.07*tau	0.03 + 0.14*tau	-0.41 + 0.44*tau	0.25	0.1	0.03	0.793	0.341	0.592
5	nocorr_fmatchedweak	Terra	All	1037	222	138	74	1	0.79	30/ 68/ 01	09/ 80/ 10	04/ 67/ 28	02/ 44/ 52	23/ 69/ 07	0.07	0.01 + 0.26*tau	0.14 + 0.20*tau	0.03 + 0.14*tau	-0.47 + 0.47*tau	0.27	0.09	0.02	0.804	0.342	0.581
5	nocorr_fmatchedweak_nocloud	Terra	All	953	202	134	69	0.98	0.77	34/ 64/ 00	11/ 79/ 08	05/ 66/ 28	01/ 44/ 53	26/ 65/ 07	0.07	0.01 + 0.25*tau	0.35 + 0.09*tau	0.03 + 0.14*tau	-0.56 + 0.52*tau	0.25	0.1	0.03	0.843	0.352	0.61
5	nocorr_fmatchedstrong	Terra	All	854	204	111	54	1.01	0.78	35/ 63/ 01	09/ 80/ 09	03/ 69/ 27	07/ 50/ 42	26/ 66/ 06	0.07	0.02 + 0.23*tau	0.47 + -0.02*tau	0.03 + 0.13*tau	-0.62 + 0.54*tau	0.26	0.09	0.02	0.729	0.318	0.543
5	nocorr_fmatchedstrong_noclo	Terra	All	796	186	104	47	0.99	0.75	39/ 59/ 00	13/ 80/ 05	04/ 67/ 27	08/ 53/ 38	30/ 63/ 05	0.07	0.04 + 0.16*tau	0.71 + -0.11*tau	0.03 + 0.14*tau	-0.62 + 0.55*tau	0.25	0.1	0.02	0.771	0.336	0.575
5	nocorr_fclimweak	Terra	All	1041	210	120	68	1.02	0.79	30/ 68/ 01	10/ 79/ 10	01/ 67/ 30	01/ 44/ 54	23/ 68/ 07	0.07	0.00 + 0.28*tau	0.20 + 0.13*tau	0.03 + 0.14*tau	-0.42 + 0.44*tau	0.27	0.09	0.02	0.767	0.341	0.555
5	nocorr_fclimweak_nocloud	Terra	All	947	189	114	62	0.99	0.79	35/ 63/ 01	11/ 81/ 07	02/ 67/ 29	00/ 43/ 56	27/ 65/ 07	0.07	0.00 + 0.27*tau	0.75 + -0.13*tau	0.03 + 0.13*tau	-0.89 + 0.67*tau	0.26	0.1	0.03	0.796	0.328	0.637
5	nocorr_fclimstrong	Terra	All	815	166	73	36	1.01	0.8	36/ 63/ 00	09/ 83/ 07	05/ 69/ 24	00/ 50/ 50	28/ 66/ 04	0.07	0.03 + 0.21*tau	0.99 + -0.26*tau	0.03 + 0.12*tau	-0.50 + 0.48*tau	0.28	0.1	0.02	0.854	0.309	0.585
5	nocorr_fclimstrong_nocloud	Terra	All	762	148	69	33	1	0.8	40/ 59/ 00	09/ 85/ 04	04/ 71/ 24	00/ 51/ 48	32/ 63/ 04	0.07	-0.02 + 0.33*tau	****** + *******tau	0.04 + 0.11*tau	-1.27 + 0.84*tau	0.27	0.11	0.03	0.869	0.298	0.709
5	albcorr_fmatchedweak	Terra	All	1001	263	138	74	1.01	0.81	15/ 83/ 01	05/ 82/ 12	04/ 67/ 28	02/ 44/ 52	11/ 79/ 08	0.05	-0.01 + 0.28*tau	0.27 + 0.13*tau	0.01 + 0.16*tau	-0.65 + 0.56*tau	0.23	0.04	0.01	0.804	0.376	0.601
5	albcorr_fmatchedweak_noclou	Terra	All	923	237	133	69	0.99	0.79	15/ 83/ 01	05/ 84/ 09	05/ 66/ 28	01/ 44/ 53	11/ 79/ 08	0.05	-0.01 + 0.28*tau	0.86 + -0.17*tau	0.01 + 0.16*tau	-0.81 + 0.65*tau	0.22	0.03	0.01	0.843	0.378	0.665
5	albcorr_fmatchedstrong	Terra	All	815	249	113	54	1.03	0.81	14/ 82/ 02	04/ 82/ 12	03/ 69/ 27	07/ 50/ 42	11/ 79/ 08	0.05	0.00 + 0.24*tau	-0.05 + 0.27*tau	0.02 + 0.16*tau	-0.15 + 0.30*tau	0.2	0.01	0	0.729	0.349	0.476
5	albcorr_fmatchedstrong_nocl	Terra	All	762	224	106	47	1.01	0.78	15/ 82/ 01	05/ 85/ 08	04/ 66/ 28	08/ 53/ 38	12/ 80/ 07	0.05	-0.00 + 0.26*tau	0.11 + 0.19*tau	0.01 + 0.17*tau	-0.32 + 0.40*tau	0.2	0.01	0	0.771	0.37	0.547
5	albcorr_fclimweak	Terra	All	994	260	123	69	1.07	0.81	12/ 85/ 02	04/ 81/ 13	00/ 65/ 34	01/ 40/ 57	09/ 80/ 09	0.05	-0.02 + 0.32*tau	0.35 + 0.07*tau	0.02 + 0.16*tau	-0.45 + 0.46*tau	0.21	0.02	0.01	0.78	0.372	0.573
5	albcorr_fclimweak_nocloud	Terra	All	904	231	118	64	1.04	0.81	12/ 85/ 02	05/ 83/ 10	01/ 66/ 31	00/ 42/ 57	09/ 81/ 09	0.05	-0.02 + 0.31*tau	0.32 + 0.09*tau	0.01 + 0.17*tau	-0.48 + 0.47*tau	0.2	0.02	0	0.802	0.383	0.584
5	albcorr_fclimstrong	Terra	All	767	215	80	37	1.05	0.8	12/ 85/ 02	05/ 80/ 13	01/ 70/ 28	00/ 51/ 48	09/ 82/ 08	0.05	0.01 + 0.25*tau	****** + *******tau	0.02 + 0.15*tau	-0.46 + 0.46*tau	0.19	0	0	0.864	0.367	0.594
5	albcorr_fclimstrong_nocloud	Terra	All	716	195	75	34	1.05	0.8	13/ 84/ 01	06/ 81/ 12	01/ 69/ 29	00/ 50/ 50	10/ 81/ 07	0.05	-0.04 + 0.36*tau	****** + *******tau	0.02 + 0.15*tau	-0.58 + 0.51*tau	0.18	0	0	0.88	0.374	0.601
5	corr1_fclimweak	Terra	All	994	260	151	41	1	0.83	12/ 85/ 02	04/ 81/ 13	03/ 67/ 28	17/ 56/ 26	10/ 81/ 07	0.05	0.04 + 0.14*tau	-0.19 + 0.28*tau	0.02 + 0.16*tau	-0.42 + 0.42*tau	0.21	0.02	0.01	0.559	0.34	0.428
5	corr1_fclimweak_nocloud	Terra	All	904	231	144	38	0.99	0.82	12/ 85/ 02	05/ 83/ 10	04/ 69/ 26	18/ 52/ 28	10/ 82/ 07	0.05	0.04 + 0.15*tau	-0.13 + 0.27*tau	0.01 + 0.17*tau	-0.34 + 0.40*tau	0.2	0.02	0	0.59	0.341	0.456
5	corr1_fclimstrong	Terra	All	767	215	95	22	0.99	0.82	12/ 85/ 02	05/ 80/ 13	04/ 70/ 25	13/ 63/ 22	10/ 82/ 07	0.05	0.05 + 0.12*tau	****** + *******tau	0.01 + 0.17*tau	****** + *******tau	0.18	0	0	0.682	0.352	0.352
5	corr1_fclimstrong_nocloud	Terra	All	716	195	88	21	1	0.82	13/ 84/ 01	06/ 81/ 12	03/ 71/ 25	14/ 61/ 23	10/ 82/ 06	0.05	0.02 + 0.20*tau	****** + *******tau	0.02 + 0.15*tau	****** + *******tau	0.18	0	0	0.677	0.331	0.331
5	corr2_fmatchedweak	Terra	All	1001	263	167	45	0.95	0.82	15/ 83/ 01	05/ 82/ 12	07/ 68/ 24	22/ 55/ 22	12/ 80/ 06	0.05	0.04 + 0.13*tau	-0.31 + 0.38*tau	0.01 + 0.17*tau	-0.35 + 0.43*tau	0.22	0.04	0.01	0.651	0.342	0.492
5	corr2_fmatchedweak_nocloud	Terra	All	923	237	160	42	0.95	0.81	15/ 83/ 01	05/ 84/ 09	06/ 68/ 24	23/ 52/ 23	12/ 80/ 06	0.05	0.04 + 0.13*tau	-0.15 + 0.31*tau	0.01 + 0.16*tau	-0.35 + 0.45*tau	0.22	0.03	0.01	0.688	0.338	0.54
5	corr2_fmatchedstrong	Terra	All	815	249	140	28	0.94	0.82	14/ 82/ 02	04/ 82/ 12	08/ 70/ 21	21/ 60/ 17	12/ 80/ 07	0.05	0.04 + 0.13*tau	-0.12 + 0.27*tau	0.02 + 0.16*tau	-0.56 + 0.59*tau	0.2	0.01	0	0.667	0.326	0.582
5	corr2_fmatchedstrong_noclou	Terra	All	762	224	129	25	0.93	0.8	15/ 82/ 01	05/ 85/ 08	08/ 68/ 22	20/ 60/ 20	12/ 81/ 05	0.05	0.04 + 0.14*tau	-0.34 + 0.39*tau	0.01 + 0.17*tau	0.18 + 0.17*tau	0.19	0.01	0	0.696	0.352	0.505
5	raw_nobuddy	Aqua	All	1585	453	174	103	1.08	0.76	22/ 69/ 08	03/ 60/ 36	04/ 63/ 32	03/ 30/ 66	16/ 65/ 18	0.08	0.00 + 0.29*tau	0.61 + -0.01*tau	0.03 + 0.18*tau	-0.12 + 0.34*tau	0.41	0.04	0.03	0.749	0.415	0.622
5	raw_nosdcheck	Aqua	All	1577	438	167	103	1.08	0.76	23/ 68/ 07	03/ 62/ 34	03/ 63/ 32	03/ 30/ 66	17/ 65/ 17	0.07	0.00 + 0.29*tau	0.61 + -0.01*tau	0.03 + 0.18*tau	-0.07 + 0.32*tau	0.39	0.04	0.03	0.746	0.417	0.62
5	raw	Aqua	All	1447	398	158	97	1.08	0.76	20/ 72/ 07	04/ 63/ 32	02/ 63/ 33	04/ 31/ 63	15/ 68/ 16	0.07	0.00 + 0.29*tau	0.82 + -0.12*tau	0.03 + 0.18*tau	-0.18 + 0.37*tau	0.39	0.04	0.02	0.735	0.41	0.615
5	raw_fqa	Aqua	All	861	189	98	60	1.04	0.81	31/ 65/ 02	04/ 80/ 15	02/ 77/ 20	06/ 38/ 55	23/ 67/ 08	0.07	0.01 + 0.25*tau	0.50 + 0.03*tau	0.02 + 0.14*tau	-0.23 + 0.39*tau	0.33	0.05	0.04	0.73	0.325	0.588
5	raw_fqa_nocloud	Aqua	All	741	158	88	54	1.04	0.83	37/ 61/ 00	05/ 84/ 10	02/ 76/ 21	03/ 42/ 53	27/ 65/ 06	0.07	0.02 + 0.22*tau	0.59 + -0.02*tau	0.02 + 0.14*tau	-0.20 + 0.36*tau	0.36	0.09	0.05	0.704	0.315	0.564
5	nocorr_fmatchedweak	Aqua	All	851	183	89	51	1.04	0.8	32/ 65/ 02	04/ 81/ 14	04/ 74/ 21	03/ 39/ 56	24/ 67/ 08	0.07	0.01 + 0.24*tau	****** + *******tau	0.02 + 0.15*tau	-0.32 + 0.43*tau	0.32	0.05	0.04	0.774	0.351	0.605
5	nocorr_fmatchedweak_nocloud	Aqua	All	727	154	81	46	1.04	0.81	38/ 60/ 00	05/ 85/ 09	02/ 74/ 23	04/ 41/ 54	28/ 64/ 06	0.07	0.03 + 0.19*tau	****** + *******tau	0.01 + 0.15*tau	-0.37 + 0.43*tau	0.36	0.11	0.06	0.737	0.352	0.57
5	nocorr_fmatchedstrong	Aqua	All	675	158	75	39	1.03	0.78	37/ 61/ 01	06/ 82/ 10	04/ 69/ 26	02/ 41/ 56	28/ 64/ 06	0.07	0.01 + 0.23*tau	****** + *******tau	0.02 + 0.15*tau	-0.52 + 0.51*tau	0.27	0.09	0.07	0.797	0.347	0.597
5	nocorr_fmatchedstrong_noclo	Aqua	All	600	137	63	32	1.02	0.81	43/ 55/ 00	08/ 81/ 10	03/ 73/ 23	03/ 43/ 53	33/ 60/ 06	0.08	0.04 + 0.15*tau	****** + *******tau	0.03 + 0.12*tau	-0.86 + 0.66*tau	0.28	0.12	0.08	0.801	0.309	0.653
5	nocorr_fclimweak	Aqua	All	840	169	68	44	1.05	0.79	32/ 65/ 02	04/ 77/ 18	04/ 67/ 27	02/ 34/ 63	25/ 65/ 08	0.07	-0.01 + 0.29*tau	****** + *******tau	0.01 + 0.18*tau	-0.55 + 0.54*tau	0.33	0.05	0.04	0.752	0.379	0.582
5	nocorr_fclimweak_nocloud	Aqua	All	721	132	62	37	1.06	0.81	38/ 60/ 00	04/ 83/ 12	01/ 69/ 29	00/ 37/ 62	29/ 63/ 06	0.07	0.01 + 0.27*tau	****** + *******tau	-0.00 + 0.20*tau	-0.51 + 0.50*tau	0.36	0.11	0.06	0.725	0.405	0.54
5	nocorr_fclimstrong	Aqua	All	625	116	47	17	1.05	0.81	40/ 59/ 00	04/ 83/ 12	04/ 70/ 25	00/ 35/ 64	32/ 62/ 05	0.07	0.02 + 0.22*tau	****** + *******tau	0.02 + 0.15*tau	****** + *******tau	0.29	0.1	0.07	0.559	0.343	0.343
5	nocorr_fclimstrong_nocloud	Aqua	All	560	93	40	16	1.04	0.86	45/ 54/ 00	05/ 84/ 09	00/ 82/ 17	00/ 31/ 68	36/ 59/ 04	0.08	0.04 + 0.18*tau	****** + *******tau	0.04 + 0.09*tau	****** + *******tau	0.28	0.13	0.09	0.578	0.238	0.238
5	albcorr_fmatchedweak	Aqua	All	814	224	89	51	1.04	0.81	14/ 82/ 02	04/ 76/ 18	03/ 75/ 21	03/ 39/ 56	11/ 79/ 09	0.06	-0.01 + 0.27*tau	****** + *******tau	0.02 + 0.16*tau	-0.37 + 0.45*tau	0.34	0.14	0.01	0.774	0.36	0.597
5	albcorr_fmatchedweak_noclou	Aqua	All	697	189	81	46	1.05	0.82	16/ 82/ 01	05/ 80/ 13	01/ 75/ 23	04/ 41/ 54	12/ 79/ 07	0.06	0.01 + 0.23*tau	0.53 + -0.00*tau	0.01 + 0.15*tau	-0.29 + 0.39*tau	0.28	0.14	0.02	0.737	0.347	0.576
5	albcorr_fmatchedstrong	Aqua	All	636	204	75	39	1.05	0.8	14/ 82/ 02	04/ 76/ 18	02/ 70/ 26	02/ 41/ 56	11/ 78/ 10	0.06	-0.00 + 0.24*tau	****** + *******tau	0.02 + 0.16*tau	-0.65 + 0.56*tau	0.22	0.02	0	0.797	0.371	0.596
5	albcorr_fmatchedstrong_nocl	Aqua	All	569	172	63	32	1.04	0.82	17/ 81/ 01	04/ 79/ 16	01/ 74/ 23	03/ 43/ 53	12/ 79/ 08	0.06	0.02 + 0.18*tau	****** + *******tau	0.03 + 0.13*tau	-0.66 + 0.57*tau	0.2	0.03	0	0.801	0.325	0.639
5	albcorr_fclimweak	Aqua	All	803	203	78	44	1.1	0.8	11/ 85/ 03	03/ 75/ 20	03/ 62/ 33	00/ 36/ 63	09/ 80/ 10	0.05	-0.02 + 0.32*tau	****** + *******tau	0.01 + 0.18*tau	-0.42 + 0.49*tau	0.31	0.07	0.01	0.775	0.386	0.616
5	albcorr_fclimweak_nocloud	Aqua	All	689	162	73	37	1.1	0.82	13/ 85/ 01	04/ 79/ 16	01/ 67/ 31	00/ 35/ 64	10/ 80/ 08	0.05	-0.02 + 0.31*tau	****** + *******tau	0.01 + 0.17*tau	-0.42 + 0.48*tau	0.28	0.08	0.02	0.748	0.361	0.591
5	albcorr_fclimstrong	Aqua	All	592	149	48	20	1.09	0.81	10/ 86/ 02	04/ 73/ 22	04/ 64/ 31	00/ 30/ 70	09/ 81/ 09	0.06	-0.00 + 0.26*tau	****** + *******tau	0.02 + 0.16*tau	****** + *******tau	0.21	0.01	0	0.563	0.354	0.354
5	albcorr_fclimstrong_nocloud	Aqua	All	535	116	42	19	1.08	0.86	13/ 84/ 01	03/ 78/ 18	02/ 73/ 23	00/ 31/ 68	11/ 81/ 07	0.05	0.00 + 0.23*tau	****** + *******tau	0.03 + 0.13*tau	****** + *******tau	0.21	0	0	0.576	0.29	0.29
5	corr1_fclimweak	Aqua	All	803	203	106	18	1.02	0.83	11/ 85/ 03	03/ 75/ 20	05/ 67/ 26	05/ 50/ 44	09/ 81/ 09	0.05	0.04 + 0.14*tau	****** + *******tau	0.03 + 0.14*tau	****** + *******tau	0.31	0.07	0.01	0.531	0.325	0.325
5	corr1_fclimweak_nocloud	Aqua	All	689	162	97	15	1.03	0.85	13/ 85/ 01	04/ 79/ 16	03/ 72/ 24	06/ 53/ 40	10/ 82/ 06	0.05	0.04 + 0.14*tau	****** + *******tau	0.02 + 0.14*tau	****** + *******tau	0.28	0.08	0.02	0.525	0.316	0.316
5	corr1_fclimstrong	Aqua	All	592	149	59	9	1.05	0.86	10/ 86/ 02	04/ 73/ 22	03/ 72/ 23	11/ 77/ 11	09/ 83/ 07	0.06	0.05 + 0.10*tau	****** + *******tau	0.04 + 0.12*tau	****** + *******tau	0.21	0.01	0	-999	-999	-999
5	corr1_fclimstrong_nocloud	Aqua	All	535	116	51	10	1.04	0.88	13/ 84/ 01	03/ 78/ 18	01/ 78/ 19	10/ 80/ 10	11/ 83/ 05	0.05	0.05 + 0.09*tau	****** + *******tau	0.04 + 0.09*tau	****** + *******tau	0.21	0	0	-999	-999	-999
5	corr2_fmatchedweak	Aqua	All	814	224	119	24	0.99	0.81	14/ 82/ 02	04/ 76/ 18	05/ 73/ 21	20/ 50/ 29	12/ 80/ 07	0.06	0.04 + 0.13*tau	-0.11 + 0.26*tau	0.01 + 0.17*tau	****** + *******tau	0.34	0.14	0.01	0.618	0.364	0.364
5	corr2_fmatchedweak_nocloud	Aqua	All	697	190	106	22	0.99	0.82	16/ 82/ 01	05/ 80/ 13	03/ 76/ 19	22/ 54/ 22	13/ 80/ 05	0.06	0.06 + 0.09*tau	****** + *******tau	0.01 + 0.16*tau	****** + *******tau	0.28	0.14	0.02	0.597	0.338	0.338
5	corr2_fmatchedstrong	Aqua	All	636	204	94	21	0.98	0.83	14/ 82/ 02	04/ 76/ 18	04/ 75/ 20	19/ 57/ 23	11/ 80/ 08	0.06	0.04 + 0.11*tau	****** + *******tau	0.04 + 0.11*tau	****** + *******tau	0.22	0.02	0	0.654	0.266	0.266
5	corr2_fmatchedstrong_noclou	Aqua	All	569	172	75	21	1	0.85	17/ 81/ 01	04/ 79/ 16	02/ 80/ 17	19/ 61/ 19	13/ 80/ 06	0.06	0.05 + 0.08*tau	****** + *******tau	0.02 + 0.14*tau	****** + *******tau	0.2	0.03	0	0.617	0.292	0.292
6	raw_nobuddy	Terra	All	2415	317	28	6	1.03	0.58	11/ 73/ 15	05/ 33/ 61	03/ 78/ 17	00/ 16/ 83	10/ 68/ 20	0.09	0.05 + 0.16*tau	****** + *******tau	0.14 + 0.08*tau	****** + *******tau	0.5	0.26	0.1	-999	-999	-999
6	raw_nosdcheck	Terra	All	2408	312	28	6	1.03	0.59	11/ 73/ 14	05/ 33/ 60	03/ 78/ 17	00/ 16/ 83	10/ 68/ 20	0.09	0.06 + 0.14*tau	****** + *******tau	0.13 + 0.09*tau	****** + *******tau	0.49	0.26	0.1	-999	-999	-999
6	raw	Terra	All	2259	300	28	6	1.02	0.59	10/ 74/ 15	06/ 33/ 60	03/ 78/ 17	00/ 16/ 83	09/ 69/ 20	0.08	0.04 + 0.21*tau	****** + *******tau	0.14 + 0.08*tau	****** + *******tau	0.49	0.23	0.04	-999	-999	-999
6	raw_fqa	Terra	All	1918	170	23	5	0.95	0.69	13/ 71/ 14	10/ 33/ 55	04/ 86/ 08	00/ 20/ 80	13/ 68/ 18	0.07	0.07 + 0.13*tau	****** + *******tau	0.16 + -0.03*tau	****** + *******tau	0.43	0.21	0.05	-999	-999	-999
6	raw_fqa_nocloud	Terra	All	1817	139	20	5	0.94	0.72	15/ 71/ 13	12/ 33/ 53	05/ 85/ 10	00/ 20/ 80	14/ 68/ 16	0.07	0.04 + 0.23*tau	****** + *******tau	0.17 + -0.06*tau	****** + *******tau	0.44	0.23	0.07	-999	-999	-999
6	nocorr_fmatchedweak	Terra	All	1915	168	23	5	0.95	0.68	13/ 71/ 14	11/ 33/ 54	04/ 86/ 08	00/ 20/ 80	13/ 68/ 17	0.07	0.04 + 0.24*tau	****** + *******tau	0.16 + -0.02*tau	****** + *******tau	0.43	0.21	0.05	-999	-999	-999
6	nocorr_fmatchedweak_nocloud	Terra	All	1811	138	20	5	0.94	0.71	15/ 71/ 13	13/ 33/ 53	05/ 85/ 10	00/ 20/ 80	14/ 68/ 16	0.07	0.09 + 0.09*tau	****** + *******tau	0.16 + -0.01*tau	****** + *******tau	0.44	0.23	0.07	-999	-999	-999
6	nocorr_fmatchedstrong	Terra	All	1283	78	9	0	0.85	0.65	22/ 75/ 01	23/ 64/ 12	22/ 55/ 22	00/ 00/ 00	22/ 75/ 02	0.06	0.06 + 0.21*tau	****** + *******tau	0.03 + 0.21*tau	****** + *******tau	0.53	0.26	0.1	-999	-999	-999
6	nocorr_fmatchedstrong_noclo	Terra	All	1207	65	7	0	0.84	0.67	24/ 74/ 00	26/ 64/ 09	28/ 57/ 14	00/ 00/ 00	24/ 73/ 01	0.06	0.07 + 0.19*tau	****** + *******tau	0.04 + 0.21*tau	****** + *******tau	0.54	0.28	0.12	-999	-999	-999
6	nocorr_fclimweak	Terra	All	1894	170	23	5	0.95	0.69	14/ 70/ 14	11/ 32/ 55	04/ 86/ 08	00/ 20/ 80	14/ 67/ 18	0.07	0.05 + 0.21*tau	****** + *******tau	0.13 + 0.06*tau	****** + *******tau	0.43	0.21	0.06	-999	-999	-999
6	nocorr_fclimweak_nocloud	Terra	All	1785	140	20	5	0.94	0.72	16/ 70/ 13	12/ 32/ 55	05/ 85/ 10	00/ 20/ 80	15/ 67/ 16	0.07	0.03 + 0.29*tau	****** + *******tau	0.16 + -0.04*tau	****** + *******tau	0.44	0.23	0.07	-999	-999	-999
6	nocorr_fclimstrong	Terra	All	1175	69	8	1	0.81	0.61	25/ 73/ 00	21/ 65/ 13	25/ 62/ 12	00/100/ 00	25/ 73/ 01	0.06	0.09 + 0.10*tau	****** + *******tau	0.06 + 0.15*tau	****** + *******tau	0.55	0.26	0.11	-999	-999	-999
6	nocorr_fclimstrong_nocloud	Terra	All	1112	57	6	1	0.8	0.59	26/ 72/ 00	28/ 63/ 08	16/ 66/ 16	00/100/ 00	26/ 72/ 00	0.06	0.08 + 0.17*tau	****** + *******tau	0.08 + 0.11*tau	****** + *******tau	0.57	0.29	0.12	-999	-999	-999
6	albcorr_fmatchedweak	Terra	All	1933	160	23	5	0.96	0.72	06/ 80/ 12	09/ 52/ 38	04/ 86/ 08	00/ 20/ 80	06/ 78/ 14	0.06	0.01 + 0.27*tau	****** + *******tau	0.10 + 0.05*tau	****** + *******tau	0.38	0.11	0.04	-999	-999	-999
6	albcorr_fmatchedweak_noclou	Terra	All	1831	129	20	5	0.94	0.74	06/ 81/ 11	10/ 58/ 31	05/ 85/ 10	00/ 20/ 80	07/ 80/ 12	0.06	0.05 + 0.14*tau	****** + *******tau	0.10 + 0.03*tau	****** + *******tau	0.38	0.12	0.04	-999	-999	-999
6	albcorr_fmatchedstrong	Terra	All	1266	104	9	0	0.89	0.67	09/ 87/ 02	13/ 71/ 15	22/ 55/ 22	00/ 00/ 00	09/ 86/ 03	0.04	0.03 + 0.24*tau	****** + *******tau	0.02 + 0.22*tau	****** + *******tau	0.31	0.03	0	-999	-999	-999
6	albcorr_fmatchedstrong_nocl	Terra	All	1193	90	7	0	0.87	0.69	10/ 87/ 01	13/ 74/ 12	28/ 57/ 14	00/ 00/ 00	10/ 86/ 02	0.04	0.04 + 0.22*tau	****** + *******tau	0.02 + 0.21*tau	****** + *******tau	0.32	0.03	0	-999	-999	-999
6	albcorr_fclimweak	Terra	All	1889	186	24	5	0.99	0.72	05/ 79/ 15	06/ 52/ 41	04/ 87/ 08	00/ 20/ 80	05/ 76/ 17	0.06	0.05 + 0.12*tau	****** + *******tau	0.10 + 0.06*tau	****** + *******tau	0.32	0.04	0	-999	-999	-999
6	albcorr_fclimweak_nocloud	Terra	All	1778	153	22	5	0.97	0.75	05/ 79/ 14	07/ 53/ 39	04/ 86/ 09	00/ 20/ 80	05/ 77/ 16	0.06	-0.01 + 0.32*tau	****** + *******tau	0.11 + 0.03*tau	****** + *******tau	0.31	0.05	0.01	-999	-999	-999
6	albcorr_fclimstrong	Terra	All	1144	105	8	1	0.88	0.65	07/ 90/ 02	08/ 74/ 17	12/ 75/ 12	00/100/ 00	07/ 88/ 03	0.04	0.04 + 0.19*tau	****** + *******tau	0.03 + 0.18*tau	****** + *******tau	0.28	0.01	0	-999	-999	-999
6	albcorr_fclimstrong_nocloud	Terra	All	1083	88	7	1	0.86	0.65	08/ 90/ 01	11/ 75/ 13	14/ 71/ 14	00/100/ 00	08/ 89/ 02	0.04	0.05 + 0.17*tau	****** + *******tau	0.02 + 0.19*tau	****** + *******tau	0.28	0.01	0	-999	-999	-999
6	corr1_fclimweak	Terra	All	1879	192	26	5	1.04	0.72	05/ 79/ 15	03/ 52/ 44	00/ 73/ 26	00/ 20/ 80	04/ 76/ 18	0.07	0.01 + 0.28*tau	****** + *******tau	0.09 + 0.09*tau	****** + *******tau	0.32	0.05	0	-999	-999	-999
6	corr1_fclimweak_nocloud	Terra	All	1768	160	25	5	1.02	0.74	05/ 80/ 14	05/ 53/ 41	00/ 76/ 24	00/ 20/ 80	05/ 77/ 16	0.06	-0.03 + 0.38*tau	****** + *******tau	0.10 + 0.05*tau	****** + *******tau	0.32	0.05	0.01	-999	-999	-999
6	corr1_fclimstrong	Terra	All	1139	109	9	1	0.93	0.66	07/ 90/ 02	05/ 75/ 19	11/ 77/ 11	00/100/ 00	07/ 88/ 03	0.04	0.05 + 0.16*tau	****** + *******tau	0.02 + 0.18*tau	****** + *******tau	0.28	0.01	0	-999	-999	-999
6	corr1_fclimstrong_nocloud	Terra	All	1078	91	9	1	0.91	0.66	08/ 90/ 01	07/ 76/ 15	11/ 77/ 11	00/100/ 00	08/ 89/ 02	0.04	0.05 + 0.15*tau	****** + *******tau	0.02 + 0.19*tau	****** + *******tau	0.28	0.01	0	-999	-999	-999
6	corr2_fmatchedweak	Terra	All	1919	173	24	5	1.01	0.72	06/ 81/ 12	05/ 54/ 40	04/ 75/ 20	00/ 20/ 80	06/ 78/ 14	0.06	-0.00 + 0.31*tau	****** + *******tau	0.10 + 0.06*tau	****** + *******tau	0.39	0.11	0.04	-999	-999	-999
6	corr2_fmatchedweak_nocloud	Terra	All	1816	142	22	5	0.99	0.74	07/ 81/ 11	06/ 56/ 37	04/ 72/ 22	00/ 20/ 80	06/ 79/ 13	0.06	0.05 + 0.15*tau	****** + *******tau	0.10 + 0.05*tau	****** + *******tau	0.39	0.12	0.04	-999	-999	-999
6	corr2_fmatchedstrong	Terra	All	1259	109	10	1	0.91	0.65	09/ 88/ 02	07/ 76/ 16	10/ 70/ 20	00/ 00/100	09/ 86/ 03	0.04	0.03 + 0.22*tau	****** + *******tau	0.02 + 0.21*tau	****** + *******tau	0.32	0.03	0	-999	-999	-999
6	corr2_fmatchedstrong_noclou	Terra	All	1187	94	8	1	0.88	0.67	10/ 88/ 01	09/ 75/ 14	12/ 75/ 12	00/ 00/100	10/ 86/ 02	0.04	0.04 + 0.19*tau	****** + *******tau	0.02 + 0.20*tau	****** + *******tau	0.32	0.03	0	-999	-999	-999
6	raw_nobuddy	Aqua	All	2155	409	38	10	1.01	0.5	11/ 72/ 16	04/ 31/ 64	05/ 68/ 26	00/ 20/ 80	10/ 65/ 24	0.1	0.02 + 0.30*tau	****** + *******tau	0.10 + 0.19*tau	****** + *******tau	0.43	0.22	0.12	-999	-999	-999
6	raw_nosdcheck	Aqua	All	2150	393	38	10	1.01	0.5	11/ 72/ 16	05/ 31/ 63	05/ 68/ 26	00/ 20/ 80	10/ 65/ 23	0.1	-0.01 + 0.38*tau	****** + *******tau	0.09 + 0.21*tau	****** + *******tau	0.42	0.21	0.12	-999	-999	-999
6	raw	Aqua	All	2066	366	35	10	1	0.52	10/ 73/ 16	04/ 31/ 63	05/ 71/ 22	00/ 20/ 80	09/ 66/ 23	0.09	-0.00 + 0.35*tau	****** + *******tau	0.10 + 0.20*tau	****** + *******tau	0.42	0.17	0.05	-999	-999	-999
6	raw_fqa	Aqua	All	1625	187	23	7	0.88	0.56	17/ 68/ 13	08/ 31/ 60	17/ 56/ 26	00/ 28/ 71	16/ 64/ 18	0.08	0.05 + 0.25*tau	****** + *******tau	0.11 + 0.16*tau	****** + *******tau	0.3	0.13	0.03	-999	-999	-999
6	raw_fqa_nocloud	Aqua	All	1466	141	17	5	0.87	0.6	17/ 69/ 12	11/ 36/ 52	17/ 58/ 23	00/ 20/ 80	17/ 66/ 16	0.08	0.05 + 0.27*tau	****** + *******tau	0.14 + 0.03*tau	****** + *******tau	0.3	0.13	0.02	-999	-999	-999
6	nocorr_fmatchedweak	Aqua	All	1624	186	23	7	0.88	0.56	17/ 68/ 13	08/ 31/ 60	17/ 56/ 26	00/ 28/ 71	16/ 64/ 18	0.08	0.03 + 0.32*tau	****** + *******tau	0.13 + 0.10*tau	****** + *******tau	0.3	0.14	0.03	-999	-999	-999
6	nocorr_fmatchedweak_nocloud	Aqua	All	1463	138	17	5	0.87	0.6	17/ 69/ 12	11/ 35/ 52	17/ 58/ 23	00/ 20/ 80	17/ 66/ 16	0.08	0.06 + 0.24*tau	****** + *******tau	0.11 + 0.16*tau	****** + *******tau	0.31	0.14	0.02	-999	-999	-999
6	nocorr_fmatchedstrong	Aqua	All	1097	73	12	2	0.76	0.56	25/ 72/ 01	21/ 61/ 16	33/ 50/ 16	00/ 00/100	25/ 71/ 02	0.06	-0.01 + 0.46*tau	****** + *******tau	0.02 + 0.31*tau	****** + *******tau	0.47	0.23	0.09	-999	-999	-999
6	nocorr_fmatchedstrong_noclo	Aqua	All	992	50	10	1	0.76	0.65	27/ 71/ 01	32/ 62/ 06	30/ 60/ 10	00/ 00/100	27/ 71/ 01	0.06	0.03 + 0.37*tau	****** + *******tau	0.02 + 0.31*tau	****** + *******tau	0.53	0.3	0.1	-999	-999	-999
6	nocorr_fclimweak	Aqua	All	1594	184	22	7	0.87	0.56	18/ 68/ 13	08/ 30/ 61	18/ 68/ 13	00/ 28/ 71	17/ 64/ 18	0.08	0.03 + 0.30*tau	****** + *******tau	0.12 + 0.15*tau	****** + *******tau	0.31	0.11	0.03	-999	-999	-999
6	nocorr_fclimweak_nocloud	Aqua	All	1440	136	16	5	0.86	0.59	18/ 68/ 12	12/ 34/ 52	18/ 62/ 18	00/ 20/ 80	18/ 65/ 16	0.08	0.05 + 0.27*tau	****** + *******tau	0.13 + 0.08*tau	****** + *******tau	0.31	0.13	0.02	-999	-999	-999
6	nocorr_fclimstrong	Aqua	All	1011	58	9	0	0.72	0.49	27/ 71/ 01	27/ 60/ 12	44/ 33/ 22	00/ 00/ 00	27/ 70/ 01	0.06	0.06 + 0.29*tau	****** + *******tau	0.01 + 0.37*tau	****** + *******tau	0.52	0.19	0.03	-999	-999	-999
6	nocorr_fclimstrong_nocloud	Aqua	All	924	43	8	0	0.73	0.48	29/ 69/ 00	34/ 55/ 09	37/ 37/ 25	00/ 00/ 00	29/ 69/ 01	0.06	0.08 + 0.26*tau	****** + *******tau	-0.02 + 0.49*tau	****** + *******tau	0.52	0.25	0.04	-999	-999	-999
6	albcorr_fmatchedweak	Aqua	All	1634	175	23	7	0.89	0.57	09/ 77/ 12	10/ 43/ 45	17/ 56/ 26	00/ 28/ 71	10/ 73/ 16	0.07	0.01 + 0.32*tau	****** + *******tau	0.09 + 0.16*tau	****** + *******tau	0.32	0.08	0.04	-999	-999	-999
6	albcorr_fmatchedweak_noclou	Aqua	All	1478	128	17	5	0.87	0.61	10/ 78/ 11	14/ 49/ 36	17/ 58/ 23	00/ 20/ 80	10/ 75/ 13	0.06	0.02 + 0.30*tau	****** + *******tau	0.08 + 0.15*tau	****** + *******tau	0.32	0.1	0.06	-999	-999	-999
6	albcorr_fmatchedstrong	Aqua	All	1074	98	12	2	0.8	0.62	12/ 85/ 02	17/ 62/ 20	33/ 50/ 16	00/ 00/100	13/ 82/ 04	0.05	-0.01 + 0.39*tau	****** + *******tau	-0.01 + 0.35*tau	****** + *******tau	0.23	0.03	0.03	-999	-999	-999
6	albcorr_fmatchedstrong_nocl	Aqua	All	977	68	10	1	0.79	0.69	13/ 84/ 02	26/ 64/ 08	30/ 60/ 10	00/ 00/100	14/ 83/ 02	0.05	0.03 + 0.30*tau	****** + *******tau	0.02 + 0.25*tau	****** + *******tau	0.23	0.03	0.03	-999	-999	-999
6	albcorr_fclimweak	Aqua	All	1579	201	22	7	0.92	0.6	07/ 76/ 16	08/ 41/ 49	18/ 59/ 22	00/ 28/ 71	07/ 71/ 20	0.07	0.01 + 0.32*tau	****** + *******tau	0.10 + 0.13*tau	****** + *******tau	0.25	0	0	-999	-999	-999
6	albcorr_fclimweak_nocloud	Aqua	All	1430	146	19	5	0.9	0.63	08/ 77/ 13	10/ 47/ 42	15/ 68/ 15	00/ 20/ 80	08/ 74/ 16	0.06	0.01 + 0.31*tau	****** + *******tau	0.04 + 0.26*tau	****** + *******tau	0.25	0.01	0	-999	-999	-999
6	albcorr_fclimstrong	Aqua	All	983	92	9	0	0.79	0.59	10/ 85/ 03	19/ 63/ 17	44/ 33/ 22	00/ 00/ 00	11/ 83/ 04	0.04	0.02 + 0.31*tau	****** + *******tau	-0.05 + 0.46*tau	****** + *******tau	0.2	0	0	-999	-999	-999
6	albcorr_fclimstrong_nocloud	Aqua	All	905	65	9	0	0.78	0.57	11/ 85/ 02	26/ 60/ 13	33/ 44/ 22	00/ 00/ 00	12/ 83/ 03	0.04	0.04 + 0.27*tau	****** + *******tau	-0.01 + 0.38*tau	****** + *******tau	0.2	0	0	-999	-999	-999
6	corr1_fclimweak	Aqua	All	1591	190	22	7	0.87	0.59	07/ 75/ 16	08/ 42/ 48	18/ 68/ 13	00/ 28/ 71	08/ 71/ 19	0.07	0.01 + 0.31*tau	****** + *******tau	0.09 + 0.15*tau	****** + *******tau	0.25	0	0	-999	-999	-999
6	corr1_fclimweak_nocloud	Aqua	All	1446	135	16	5	0.86	0.62	08/ 76/ 14	13/ 49/ 37	18/ 62/ 18	00/ 20/ 80	09/ 74/ 16	0.06	0.03 + 0.25*tau	****** + *******tau	0.06 + 0.20*tau	****** + *******tau	0.25	0.01	0	-999	-999	-999
6	corr1_fclimstrong	Aqua	All	989	86	9	0	0.75	0.57	10/ 85/ 03	20/ 62/ 16	44/ 33/ 22	00/ 00/ 00	11/ 83/ 04	0.04	0.01 + 0.35*tau	****** + *******tau	-0.04 + 0.49*tau	****** + *******tau	0.2	0	0	-999	-999	-999
6	corr1_fclimstrong_nocloud	Aqua	All	912	59	8	0	0.75	0.56	11/ 85/ 03	27/ 61/ 11	37/ 37/ 25	00/ 00/ 00	12/ 83/ 03	0.04	0.03 + 0.30*tau	****** + *******tau	-0.02 + 0.42*tau	****** + *******tau	0.2	0	0	-999	-999	-999
6	corr2_fmatchedweak	Aqua	All	1650	167	19	6	0.86	0.57	10/ 76/ 13	12/ 44/ 43	15/ 63/ 21	00/ 33/ 66	10/ 73/ 16	0.07	0.03 + 0.25*tau	****** + *******tau	0.08 + 0.17*tau	****** + *******tau	0.32	0.08	0.04	-999	-999	-999
6	corr2_fmatchedweak_nocloud	Aqua	All	1490	120	16	5	0.83	0.6	10/ 77/ 11	17/ 50/ 32	25/ 56/ 18	00/ 20/ 80	11/ 75/ 13	0.06	0.03 + 0.26*tau	****** + *******tau	0.06 + 0.22*tau	****** + *******tau	0.31	0.1	0.06	-999	-999	-999
6	corr2_fmatchedstrong	Aqua	All	1082	93	9	2	0.76	0.61	12/ 84/ 02	20/ 63/ 16	33/ 55/ 11	00/ 00/100	13/ 82/ 03	0.05	-0.01 + 0.39*tau	****** + *******tau	0.00 + 0.35*tau	****** + *******tau	0.22	0.03	0.03	-999	-999	-999
6	corr2_fmatchedstrong_noclou	Aqua	All	982	64	9	1	0.75	0.68	13/ 84/ 02	31/ 60/ 07	44/ 55/ 00	00/ 00/100	14/ 82/ 02	0.04	0.02 + 0.32*tau	****** + *******tau	0.03 + 0.26*tau	****** + *******tau	0.23	0.03	0.03	-999	-999	-999
7	raw_nobuddy	Terra	All	1086	302	9	0	0.88	0.41	10/ 83/ 05	09/ 70/ 19	22/ 55/ 22	00/ 00/ 00	10/ 80/ 08	0.06	0.01 + 0.24*tau	****** + *******tau	0.01 + 0.26*tau	****** + *******tau	0.32	0.12	0.05	-999	-999	-999
7	raw_nosdcheck	Terra	All	1087	297	9	0	0.88	0.43	10/ 84/ 05	09/ 71/ 19	22/ 55/ 22	00/ 00/ 00	10/ 81/ 08	0.06	0.01 + 0.24*tau	****** + *******tau	0.04 + 0.18*tau	****** + *******tau	0.31	0.12	0.05	-999	-999	-999
7	raw	Terra	All	1030	282	9	0	0.87	0.45	10/ 86/ 03	10/ 73/ 16	22/ 55/ 22	00/ 00/ 00	10/ 83/ 06	0.05	0.02 + 0.22*tau	****** + *******tau	0.01 + 0.26*tau	****** + *******tau	0.33	0.11	0.01	-999	-999	-999
7	raw_fqa	Terra	All	872	211	7	0	0.83	0.57	11/ 87/ 01	12/ 77/ 09	28/ 71/ 00	00/ 00/ 00	11/ 85/ 02	0.05	0.02 + 0.22*tau	****** + *******tau	0.02 + 0.21*tau	****** + *******tau	0.3	0.11	0.02	-999	-999	-999
7	raw_fqa_nocloud	Terra	All	856	198	7	0	0.82	0.61	11/ 87/ 01	12/ 79/ 08	28/ 71/ 00	00/ 00/ 00	11/ 85/ 02	0.05	0.02 + 0.20*tau	****** + *******tau	0.02 + 0.21*tau	****** + *******tau	0.3	0.11	0.02	-999	-999	-999
7	nocorr_fmatchedweak	Terra	All	873	209	7	0	0.84	0.56	10/ 87/ 01	11/ 77/ 10	28/ 71/ 00	00/ 00/ 00	11/ 85/ 02	0.05	0.01 + 0.23*tau	****** + *******tau	0.02 + 0.21*tau	****** + *******tau	0.3	0.11	0.02	-999	-999	-999
7	nocorr_fmatchedweak_nocloud	Terra	All	857	196	7	0	0.83	0.61	11/ 87/ 01	12/ 79/ 08	28/ 71/ 00	00/ 00/ 00	11/ 86/ 02	0.05	0.02 + 0.21*tau	****** + *******tau	0.02 + 0.19*tau	****** + *******tau	0.3	0.12	0.02	-999	-999	-999
7	nocorr_fmatchedstrong	Terra	All	530	93	1	0	0.87	0.39	10/ 89/ 00	07/ 79/ 12	100/ 00/ 00	00/ 00/ 00	09/ 87/ 02	0.05	-0.02 + 0.34*tau	****** + *******tau	-0.05 + 0.43*tau	****** + *******tau	0.27	0.08	0.03	-999	-999	-999
7	nocorr_fmatchedstrong_noclo	Terra	All	519	80	1	0	0.85	0.45	10/ 88/ 00	07/ 82/ 10	100/ 00/ 00	00/ 00/ 00	10/ 87/ 01	0.05	-0.03 + 0.39*tau	****** + *******tau	-0.01 + 0.27*tau	****** + *******tau	0.26	0.09	0.03	-999	-999	-999
7	nocorr_fclimweak	Terra	All	867	204	7	0	0.84	0.58	11/ 87/ 01	12/ 77/ 09	28/ 71/ 00	00/ 00/ 00	11/ 85/ 02	0.05	0.01 + 0.23*tau	****** + *******tau	0.01 + 0.22*tau	****** + *******tau	0.29	0.11	0.03	-999	-999	-999
7	nocorr_fclimweak_nocloud	Terra	All	848	190	7	0	0.82	0.61	11/ 87/ 00	13/ 78/ 07	28/ 71/ 00	00/ 00/ 00	12/ 85/ 02	0.05	0.01 + 0.23*tau	****** + *******tau	0.02 + 0.19*tau	****** + *******tau	0.29	0.12	0.03	-999	-999	-999
7	nocorr_fclimstrong	Terra	All	423	63	0	0	0.92	0.18	10/ 88/ 00	06/ 84/ 09	00/ 00/ 00	00/ 00/ 00	10/ 87/ 02	0.05	-0.01 + 0.29*tau	****** + *******tau	0.02 + 0.15*tau	****** + *******tau	0.26	0.09	0.03	-999	-999	-999
7	nocorr_fclimstrong_nocloud	Terra	All	414	51	0	0	0.89	0.26	10/ 88/ 00	07/ 88/ 03	00/ 00/ 00	00/ 00/ 00	10/ 88/ 01	0.05	0.01 + 0.25*tau	****** + *******tau	0.07 + -0.05*tau	****** + *******tau	0.26	0.09	0.03	-999	-999	-999
7	albcorr_fmatchedweak	Terra	All	828	253	7	0	0.88	0.61	06/ 90/ 02	09/ 79/ 11	28/ 71/ 00	00/ 00/ 00	07/ 87/ 04	0.05	0.01 + 0.21*tau	****** + *******tau	0.00 + 0.23*tau	****** + *******tau	0.24	0.09	0.05	-999	-999	-999
7	albcorr_fmatchedweak_noclou	Terra	All	817	237	7	0	0.87	0.64	06/ 91/ 02	09/ 81/ 09	28/ 71/ 00	00/ 00/ 00	07/ 88/ 03	0.05	0.01 + 0.19*tau	****** + *******tau	0.00 + 0.22*tau	****** + *******tau	0.24	0.09	0.05	-999	-999	-999
7	albcorr_fmatchedstrong	Terra	All	491	134	1	0	0.94	0.44	03/ 93/ 02	04/ 79/ 16	100/ 00/ 00	00/ 00/ 00	04/ 90/ 05	0.04	-0.04 + 0.37*tau	****** + *******tau	-0.05 + 0.39*tau	****** + *******tau	0.2	0.02	0.01	-999	-999	-999
7	albcorr_fmatchedstrong_nocl	Terra	All	481	119	1	0	0.92	0.49	03/ 94/ 01	04/ 82/ 13	100/ 00/ 00	00/ 00/ 00	04/ 91/ 04	0.04	-0.03 + 0.35*tau	****** + *******tau	-0.02 + 0.28*tau	****** + *******tau	0.19	0.02	0.01	-999	-999	-999
7	albcorr_fclimweak	Terra	All	798	271	9	0	0.92	0.64	04/ 92/ 03	05/ 81/ 13	11/ 88/ 00	00/ 00/ 00	04/ 89/ 05	0.04	0.01 + 0.19*tau	****** + *******tau	0.00 + 0.21*tau	****** + *******tau	0.21	0.05	0.03	-999	-999	-999
7	albcorr_fclimweak_nocloud	Terra	All	783	252	9	0	0.9	0.67	04/ 92/ 02	06/ 83/ 10	11/ 88/ 00	00/ 00/ 00	04/ 90/ 04	0.04	-0.00 + 0.21*tau	****** + *******tau	0.02 + 0.14*tau	****** + *******tau	0.21	0.05	0.03	-999	-999	-999
7	albcorr_fclimstrong	Terra	All	377	109	0	0	1.03	0.34	03/ 92/ 03	03/ 80/ 15	00/ 00/ 00	00/ 00/ 00	03/ 89/ 06	0.04	-0.02 + 0.29*tau	****** + *******tau	-0.01 + 0.26*tau	****** + *******tau	0.18	0	0	-999	-999	-999
7	albcorr_fclimstrong_nocloud	Terra	All	369	96	0	0	1	0.41	04/ 93/ 02	03/ 86/ 10	00/ 00/ 00	00/ 00/ 00	03/ 91/ 04	0.04	-0.02 + 0.28*tau	****** + *******tau	0.01 + 0.15*tau	****** + *******tau	0.17	0	0	-999	-999	-999
7	corr1_fclimweak	Terra	All	809	262	7	0	0.88	0.63	04/ 92/ 03	08/ 79/ 12	28/ 71/ 00	00/ 00/ 00	05/ 88/ 05	0.04	-0.01 + 0.24*tau	****** + *******tau	-0.00 + 0.24*tau	****** + *******tau	0.21	0.05	0.03	-999	-999	-999
7	corr1_fclimweak_nocloud	Terra	All	796	242	6	0	0.86	0.66	04/ 92/ 02	08/ 82/ 08	33/ 66/ 00	00/ 00/ 00	05/ 90/ 04	0.04	-0.01 + 0.26*tau	****** + *******tau	0.02 + 0.16*tau	****** + *******tau	0.2	0.05	0.03	-999	-999	-999
7	corr1_fclimstrong	Terra	All	382	104	0	0	0.98	0.33	03/ 92/ 03	03/ 84/ 11	00/ 00/ 00	00/ 00/ 00	03/ 90/ 05	0.04	-0.03 + 0.31*tau	****** + *******tau	0.00 + 0.19*tau	****** + *******tau	0.17	0	0	-999	-999	-999
7	corr1_fclimstrong_nocloud	Terra	All	375	91	0	0	0.96	0.4	04/ 93/ 02	03/ 86/ 09	00/ 00/ 00	00/ 00/ 00	03/ 91/ 04	0.04	-0.02 + 0.29*tau	****** + *******tau	0.04 + 0.05*tau	****** + *******tau	0.17	0	0	-999	-999	-999
7	corr2_fmatchedweak	Terra	All	833	250	6	0	0.84	0.61	06/ 90/ 02	10/ 79/ 10	33/ 66/ 00	00/ 00/ 00	07/ 87/ 04	0.05	-0.01 + 0.27*tau	****** + *******tau	-0.01 + 0.28*tau	****** + *******tau	0.24	0.09	0.05	-999	-999	-999
7	corr2_fmatchedweak_nocloud	Terra	All	824	231	6	0	0.82	0.63	07/ 90/ 02	11/ 80/ 08	33/ 66/ 00	00/ 00/ 00	08/ 88/ 03	0.04	-0.00 + 0.25*tau	****** + *******tau	-0.01 + 0.29*tau	****** + *******tau	0.23	0.09	0.05	-999	-999	-999
7	corr2_fmatchedstrong	Terra	All	499	126	1	0	0.9	0.42	03/ 93/ 02	04/ 82/ 12	100/ 00/ 00	00/ 00/ 00	04/ 91/ 04	0.04	-0.05 + 0.41*tau	****** + *******tau	-0.04 + 0.37*tau	****** + *******tau	0.19	0.02	0.01	-999	-999	-999
7	corr2_fmatchedstrong_noclou	Terra	All	491	110	1	0	0.88	0.47	03/ 94/ 01	04/ 83/ 11	100/ 00/ 00	00/ 00/ 00	04/ 92/ 03	0.04	-0.05 + 0.41*tau	****** + *******tau	-0.08 + 0.53*tau	****** + *******tau	0.19	0.02	0.01	-999	-999	-999
7	raw_nobuddy	Aqua	All	1011	349	15	0	0.96	0.33	15/ 78/ 06	09/ 58/ 32	00/ 53/ 46	00/ 00/ 00	13/ 73/ 13	0.07	0.03 + 0.23*tau	****** + *******tau	-0.00 + 0.34*tau	****** + *******tau	0.32	0.06	0.03	-999	-999	-999
7	raw_nosdcheck	Aqua	All	1009	336	16	0	0.95	0.33	15/ 78/ 05	09/ 58/ 31	00/ 56/ 43	00/ 00/ 00	13/ 73/ 12	0.07	0.02 + 0.26*tau	****** + *******tau	0.01 + 0.30*tau	****** + *******tau	0.32	0.06	0.03	-999	-999	-999
7	raw	Aqua	All	988	312	16	0	0.94	0.32	13/ 80/ 05	10/ 60/ 28	00/ 56/ 43	00/ 00/ 00	13/ 75/ 11	0.07	0.03 + 0.23*tau	****** + *******tau	-0.01 + 0.35*tau	****** + *******tau	0.32	0.05	0.02	-999	-999	-999
7	raw_fqa	Aqua	All	758	190	9	0	0.88	0.49	16/ 80/ 02	14/ 67/ 17	11/ 66/ 22	00/ 00/ 00	16/ 78/ 05	0.06	0.02 + 0.25*tau	****** + *******tau	0.03 + 0.18*tau	****** + *******tau	0.3	0.06	0.01	-999	-999	-999
7	raw_fqa_nocloud	Aqua	All	718	163	6	0	0.86	0.46	17/ 80/ 01	17/ 69/ 13	00/ 83/ 16	00/ 00/ 00	17/ 78/ 03	0.06	0.01 + 0.27*tau	****** + *******tau	0.04 + 0.15*tau	****** + *******tau	0.31	0.07	0.01	-999	-999	-999
7	nocorr_fmatchedweak	Aqua	All	758	187	9	0	0.88	0.49	16/ 80/ 02	14/ 67/ 17	11/ 66/ 22	00/ 00/ 00	16/ 77/ 05	0.06	0.01 + 0.27*tau	****** + *******tau	0.02 + 0.24*tau	****** + *******tau	0.3	0.06	0.01	-999	-999	-999
7	nocorr_fmatchedweak_nocloud	Aqua	All	718	159	6	0	0.85	0.45	17/ 80/ 01	17/ 68/ 13	00/ 83/ 16	00/ 00/ 00	17/ 78/ 03	0.06	0.00 + 0.29*tau	****** + *******tau	0.06 + 0.09*tau	****** + *******tau	0.31	0.07	0.01	-999	-999	-999
7	nocorr_fmatchedstrong	Aqua	All	451	76	1	0	0.93	0.39	13/ 86/ 00	11/ 72/ 15	00/100/ 00	00/ 00/ 00	12/ 84/ 03	0.05	0.00 + 0.29*tau	****** + *******tau	0.03 + 0.15*tau	****** + *******tau	0.27	0.05	0.03	-999	-999	-999
7	nocorr_fmatchedstrong_noclo	Aqua	All	416	60	1	0	0.91	0.34	12/ 86/ 00	11/ 75/ 13	00/100/ 00	00/ 00/ 00	12/ 84/ 02	0.05	-0.01 + 0.35*tau	****** + *******tau	0.01 + 0.23*tau	****** + *******tau	0.27	0.06	0.03	-999	-999	-999
7	nocorr_fclimweak	Aqua	All	749	169	7	0	0.86	0.52	17/ 82/ 00	16/ 73/ 09	14/ 71/ 14	00/ 00/ 00	17/ 80/ 02	0.05	0.01 + 0.28*tau	****** + *******tau	0.02 + 0.21*tau	****** + *******tau	0.27	0.06	0.03	-999	-999	-999
7	nocorr_fclimweak_nocloud	Aqua	All	704	147	4	0	0.83	0.5	18/ 80/ 00	19/ 74/ 06	00/100/ 00	00/ 00/ 00	18/ 79/ 01	0.05	0.01 + 0.29*tau	****** + *******tau	0.04 + 0.11*tau	****** + *******tau	0.27	0.07	0.03	-999	-999	-999
7	nocorr_fclimstrong	Aqua	All	333	43	1	0	0.89	0.49	13/ 86/ 00	09/ 79/ 11	00/100/ 00	00/ 00/ 00	12/ 85/ 01	0.05	0.01 + 0.24*tau	****** + *******tau	-0.02 + 0.28*tau	****** + *******tau	0.27	0.06	0.03	-999	-999	-999
7	nocorr_fclimstrong_nocloud	Aqua	All	307	29	1	0	0.89	0.58	13/ 86/ 00	06/ 86/ 06	00/100/ 00	00/ 00/ 00	12/ 86/ 00	0.05	0.02 + 0.20*tau	****** + *******tau	****** + *******tau	****** + *******tau	0.26	0.05	0.03	-999	-999	-999
7	albcorr_fmatchedweak	Aqua	All	722	223	9	0	0.92	0.51	15/ 79/ 05	08/ 74/ 17	11/ 66/ 22	00/ 00/ 00	13/ 78/ 08	0.06	0.00 + 0.26*tau	****** + *******tau	-0.00 + 0.27*tau	****** + *******tau	0.22	0	0	-999	-999	-999
7	albcorr_fmatchedweak_noclou	Aqua	All	688	189	6	0	0.9	0.5	16/ 80/ 03	08/ 75/ 15	00/ 83/ 16	00/ 00/ 00	14/ 79/ 06	0.06	-0.00 + 0.28*tau	****** + *******tau	0.04 + 0.13*tau	****** + *******tau	0.21	0	0	-999	-999	-999
7	albcorr_fmatchedstrong	Aqua	All	412	114	1	0	0.99	0.44	08/ 87/ 04	04/ 78/ 17	00/100/ 00	00/ 00/ 00	07/ 85/ 07	0.05	-0.01 + 0.30*tau	****** + *******tau	-0.01 + 0.28*tau	****** + *******tau	0.19	0	0	-999	-999	-999
7	albcorr_fmatchedstrong_nocl	Aqua	All	385	91	1	0	0.97	0.4	07/ 88/ 03	04/ 82/ 13	00/100/ 00	00/ 00/ 00	07/ 87/ 05	0.05	-0.04 + 0.39*tau	****** + *******tau	-0.03 + 0.33*tau	****** + *******tau	0.18	0	0	-999	-999	-999
7	albcorr_fclimweak	Aqua	All	681	237	7	0	0.94	0.56	10/ 85/ 03	05/ 79/ 15	00/ 85/ 14	00/ 00/ 00	09/ 84/ 06	0.05	0.00 + 0.25*tau	****** + *******tau	0.00 + 0.23*tau	****** + *******tau	0.2	0	0	-999	-999	-999
7	albcorr_fclimweak_nocloud	Aqua	All	650	200	5	0	0.91	0.55	11/ 85/ 03	06/ 84/ 09	00/100/ 00	00/ 00/ 00	10/ 85/ 04	0.05	0.00 + 0.25*tau	****** + *******tau	0.02 + 0.15*tau	****** + *******tau	0.19	0	0	-999	-999	-999
7	albcorr_fclimstrong	Aqua	All	290	88	1	0	1	0.53	04/ 90/ 05	01/ 85/ 13	00/100/ 00	00/ 00/ 00	03/ 89/ 07	0.05	-0.03 + 0.29*tau	****** + *******tau	-0.04 + 0.37*tau	****** + *******tau	0.19	0	0	-999	-999	-999
7	albcorr_fclimstrong_nocloud	Aqua	All	272	65	1	0	1	0.6	04/ 91/ 04	00/ 90/ 09	00/100/ 00	00/ 00/ 00	03/ 91/ 05	0.04	-0.03 + 0.28*tau	****** + *******tau	-0.02 + 0.26*tau	****** + *******tau	0.18	0	0	-999	-999	-999
7	corr1_fclimweak	Aqua	All	721	201	4	0	0.85	0.54	11/ 84/ 03	14/ 75/ 10	25/ 50/ 25	00/ 00/ 00	12/ 82/ 05	0.05	-0.02 + 0.32*tau	****** + *******tau	0.00 + 0.26*tau	****** + *******tau	0.19	0	0	-999	-999	-999
7	corr1_fclimweak_nocloud	Aqua	All	679	174	3	0	0.83	0.52	11/ 85/ 02	17/ 77/ 05	00/100/ 00	00/ 00/ 00	12/ 83/ 03	0.05	-0.02 + 0.32*tau	****** + *******tau	0.02 + 0.19*tau	****** + *******tau	0.17	0	0	-999	-999	-999
7	corr1_fclimstrong	Aqua	All	312	66	1	0	0.91	0.48	04/ 91/ 04	06/ 83/ 10	00/100/ 00	00/ 00/ 00	04/ 89/ 05	0.04	-0.03 + 0.32*tau	****** + *******tau	-0.04 + 0.35*tau	****** + *******tau	0.19	0	0	-999	-999	-999
7	corr1_fclimstrong_nocloud	Aqua	All	287	51	1	0	0.91	0.57	03/ 91/ 04	03/ 92/ 03	100/ 00/ 00	00/ 00/ 00	04/ 91/ 04	0.04	-0.03 + 0.33*tau	****** + *******tau	0.02 + 0.14*tau	****** + *******tau	0.18	0	0	-999	-999	-999
7	corr2_fmatchedweak	Aqua	All	750	201	3	0	0.84	0.5	15/ 79/ 04	15/ 67/ 16	33/ 66/ 00	00/ 00/ 00	15/ 76/ 07	0.06	-0.02 + 0.36*tau	****** + *******tau	-0.02 + 0.34*tau	****** + *******tau	0.2	0	0	-999	-999	-999
7	corr2_fmatchedweak_nocloud	Aqua	All	715	166	2	0	0.82	0.46	16/ 79/ 04	18/ 69/ 12	50/ 50/ 00	00/ 00/ 00	16/ 77/ 05	0.05	-0.02 + 0.37*tau	****** + *******tau	0.03 + 0.18*tau	****** + *******tau	0.21	0	0	-999	-999	-999
7	corr2_fmatchedstrong	Aqua	All	436	92	0	0	0.91	0.4	07/ 87/ 04	10/ 73/ 15	00/ 00/ 00	00/ 00/ 00	08/ 85/ 06	0.05	-0.04 + 0.40*tau	****** + *******tau	0.01 + 0.21*tau	****** + *******tau	0.18	0	0	-999	-999	-999
7	corr2_fmatchedstrong_noclou	Aqua	All	403	73	1	0	0.89	0.37	07/ 88/ 03	08/ 82/ 09	100/ 00/ 00	00/ 00/ 00	08/ 87/ 04	0.04	-0.05 + 0.44*tau	****** + *******tau	0.00 + 0.24*tau	****** + *******tau	0.17	0	0	-999	-999	-999
8	raw_nobuddy	Terra	All	470	206	13	0	1	0.46	29/ 68/ 01	06/ 75/ 18	00/ 30/ 69	00/ 00/ 00	21/ 69/ 08	0.07	0.02 + 0.21*tau	****** + *******tau	-0.00 + 0.26*tau	****** + *******tau	0.42	0.21	0.09	-999	-999	-999
8	raw_nosdcheck	Terra	All	473	197	12	0	0.98	0.44	29/ 68/ 01	07/ 76/ 16	00/ 33/ 66	00/ 00/ 00	22/ 70/ 07	0.07	0.04 + 0.15*tau	****** + *******tau	-0.00 + 0.25*tau	****** + *******tau	0.42	0.2	0.1	-999	-999	-999
8	raw	Terra	All	463	177	10	0	0.96	0.45	24/ 74/ 01	07/ 76/ 15	00/ 40/ 60	00/ 00/ 00	19/ 74/ 06	0.06	0.02 + 0.21*tau	****** + *******tau	0.00 + 0.23*tau	****** + *******tau	0.44	0.18	0.02	-999	-999	-999
8	raw_fqa	Terra	All	339	82	4	0	0.91	0.51	30/ 68/ 00	08/ 84/ 07	00/ 75/ 25	00/ 00/ 00	26/ 71/ 02	0.07	0.04 + 0.14*tau	****** + *******tau	0.06 + 0.03*tau	****** + *******tau	0.4	0.21	0.03	-999	-999	-999
8	raw_fqa_nocloud	Terra	All	330	66	2	0	0.9	0.59	33/ 65/ 00	09/ 90/ 00	00/ 50/ 50	00/ 00/ 00	29/ 69/ 01	0.07	0.07 + 0.06*tau	****** + *******tau	0.06 + 0.01*tau	****** + *******tau	0.41	0.22	0.05	-999	-999	-999
8	nocorr_fmatchedweak	Terra	All	339	82	4	0	0.9	0.52	31/ 67/ 00	08/ 85/ 06	00/ 75/ 25	00/ 00/ 00	26/ 71/ 02	0.07	0.04 + 0.15*tau	****** + *******tau	0.06 + 0.03*tau	****** + *******tau	0.4	0.21	0.03	-999	-999	-999
8	nocorr_fmatchedweak_nocloud	Terra	All	329	67	2	0	0.9	0.59	34/ 64/ 00	08/ 91/ 00	00/ 50/ 50	00/ 00/ 00	29/ 69/ 01	0.07	0.07 + 0.06*tau	****** + *******tau	0.06 + 0.01*tau	****** + *******tau	0.41	0.22	0.05	-999	-999	-999
8	nocorr_fmatchedstrong	Terra	All	294	71	3	0	0.87	0.55	34/ 64/ 00	09/ 81/ 08	00/ 66/ 33	00/ 00/ 00	29/ 68/ 02	0.07	0.06 + 0.11*tau	****** + *******tau	0.07 + 0.01*tau	****** + *******tau	0.35	0.17	0.05	-999	-999	-999
8	nocorr_fmatchedstrong_noclo	Terra	All	281	58	2	0	0.86	0.6	37/ 61/ 00	10/ 87/ 01	00/ 50/ 50	00/ 00/ 00	32/ 66/ 01	0.07	0.06 + 0.11*tau	****** + *******tau	0.10 + -0.14*tau	****** + *******tau	0.37	0.17	0.06	-999	-999	-999
8	nocorr_fclimweak	Terra	All	337	78	4	0	0.89	0.51	34/ 65/ 00	10/ 83/ 06	00/ 75/ 25	00/ 00/ 00	29/ 68/ 01	0.07	0.05 + 0.12*tau	****** + *******tau	0.06 + 0.01*tau	****** + *******tau	0.4	0.22	0.04	-999	-999	-999
8	nocorr_fclimweak_nocloud	Terra	All	327	60	2	0	0.87	0.6	36/ 62/ 00	11/ 88/ 00	00/ 50/ 50	00/ 00/ 00	32/ 66/ 00	0.07	0.08 + 0.06*tau	****** + *******tau	0.07 + -0.04*tau	****** + *******tau	0.41	0.24	0.05	-999	-999	-999
8	nocorr_fclimstrong	Terra	All	273	61	4	0	0.88	0.49	38/ 60/ 00	13/ 81/ 04	00/ 50/ 50	00/ 00/ 00	33/ 64/ 02	0.07	0.05 + 0.17*tau	****** + *******tau	0.06 + 0.07*tau	****** + *******tau	0.37	0.18	0.06	-999	-999	-999
8	nocorr_fclimstrong_nocloud	Terra	All	260	49	2	0	0.85	0.63	41/ 57/ 00	16/ 83/ 00	00/ 50/ 50	00/ 00/ 00	37/ 61/ 00	0.07	0.07 + 0.11*tau	****** + *******tau	0.07 + 0.00*tau	****** + *******tau	0.38	0.19	0.07	-999	-999	-999
8	albcorr_fmatchedweak	Terra	All	333	89	4	0	0.94	0.54	22/ 76/ 00	04/ 86/ 08	00/ 75/ 25	00/ 00/ 00	18/ 78/ 02	0.06	0.04 + 0.12*tau	****** + *******tau	0.05 + 0.05*tau	****** + *******tau	0.33	0.11	0.03	-999	-999	-999
8	albcorr_fmatchedweak_noclou	Terra	All	322	77	2	0	0.93	0.59	23/ 75/ 00	05/ 89/ 05	00/ 50/ 50	00/ 00/ 00	20/ 78/ 01	0.06	0.06 + 0.07*tau	****** + *******tau	0.08 + -0.08*tau	****** + *******tau	0.35	0.12	0.03	-999	-999	-999
8	albcorr_fmatchedstrong	Terra	All	281	83	3	0	0.94	0.57	16/ 82/ 01	06/ 84/ 09	00/ 66/ 33	00/ 00/ 00	13/ 82/ 03	0.05	0.03 + 0.12*tau	****** + *******tau	0.04 + 0.06*tau	****** + *******tau	0.25	0.03	0	-999	-999	-999
8	albcorr_fmatchedstrong_nocl	Terra	All	267	71	2	0	0.92	0.59	16/ 82/ 01	07/ 85/ 07	00/ 50/ 50	00/ 00/ 00	14/ 82/ 02	0.05	0.05 + 0.07*tau	****** + *******tau	0.07 + -0.04*tau	****** + *******tau	0.25	0.03	0	-999	-999	-999
8	albcorr_fclimweak	Terra	All	316	100	4	0	0.96	0.57	13/ 85/ 01	04/ 88/ 08	00/ 50/ 50	00/ 00/ 00	10/ 85/ 03	0.05	0.02 + 0.17*tau	****** + *******tau	0.02 + 0.11*tau	****** + *******tau	0.27	0.04	0.01	-999	-999	-999
8	albcorr_fclimweak_nocloud	Terra	All	309	80	2	0	0.94	0.61	15/ 84/ 00	03/ 90/ 06	00/ 50/ 50	00/ 00/ 00	12/ 85/ 02	0.05	0.03 + 0.15*tau	****** + *******tau	0.07 + -0.05*tau	****** + *******tau	0.27	0.05	0.01	-999	-999	-999
8	albcorr_fclimstrong	Terra	All	254	79	4	0	0.96	0.52	16/ 82/ 01	06/ 87/ 06	00/ 50/ 50	00/ 00/ 00	13/ 83/ 02	0.05	0.02 + 0.18*tau	****** + *******tau	0.01 + 0.18*tau	****** + *******tau	0.23	0.01	0	-999	-999	-999
8	albcorr_fclimstrong_nocloud	Terra	All	241	68	2	0	0.92	0.6	16/ 82/ 00	07/ 89/ 02	00/ 50/ 50	00/ 00/ 00	14/ 84/ 01	0.05	0.02 + 0.18*tau	****** + *******tau	0.04 + 0.06*tau	****** + *******tau	0.24	0.01	0	-999	-999	-999
8	corr1_fclimweak	Terra	All	309	107	4	0	1.06	0.59	13/ 85/ 01	01/ 85/ 12	00/ 50/ 50	00/ 00/ 00	10/ 85/ 04	0.05	0.01 + 0.21*tau	****** + *******tau	-0.01 + 0.20*tau	****** + *******tau	0.29	0.04	0.01	-999	-999	-999
8	corr1_fclimweak_nocloud	Terra	All	303	85	2	0	1.03	0.62	15/ 83/ 00	01/ 90/ 08	00/ 50/ 50	00/ 00/ 00	12/ 84/ 02	0.05	0.03 + 0.13*tau	****** + *******tau	0.01 + 0.14*tau	****** + *******tau	0.31	0.05	0.01	-999	-999	-999
8	corr1_fclimstrong	Terra	All	246	87	4	0	1.06	0.56	15/ 83/ 01	03/ 88/ 08	00/ 50/ 50	00/ 00/ 00	12/ 84/ 03	0.05	0.01 + 0.20*tau	****** + *******tau	-0.04 + 0.29*tau	****** + *******tau	0.25	0.01	0	-999	-999	-999
8	corr1_fclimstrong_nocloud	Terra	All	236	73	2	0	1.01	0.62	16/ 82/ 01	02/ 90/ 06	00/ 50/ 50	00/ 00/ 00	12/ 84/ 02	0.05	0.01 + 0.18*tau	****** + *******tau	0.00 + 0.16*tau	****** + *******tau	0.25	0.01	0	-999	-999	-999
8	corr2_fmatchedweak	Terra	All	324	98	4	0	1.04	0.58	22/ 76/ 00	01/ 89/ 09	00/ 50/ 50	00/ 00/ 00	17/ 79/ 03	0.06	0.03 + 0.14*tau	****** + *******tau	0.00 + 0.19*tau	****** + *******tau	0.35	0.11	0.03	-999	-999	-999
8	corr2_fmatchedweak_nocloud	Terra	All	317	80	3	0	1.02	0.61	23/ 76/ 00	01/ 92/ 06	00/ 66/ 33	00/ 00/ 00	18/ 79/ 02	0.06	0.05 + 0.09*tau	****** + *******tau	0.02 + 0.11*tau	****** + *******tau	0.37	0.12	0.03	-999	-999	-999
8	corr2_fmatchedstrong	Terra	All	270	93	4	0	1.03	0.61	15/ 82/ 01	02/ 88/ 09	00/ 50/ 50	00/ 00/ 00	12/ 83/ 04	0.05	0.03 + 0.13*tau	****** + *******tau	0.00 + 0.17*tau	****** + *******tau	0.27	0.03	0	-999	-999	-999
8	corr2_fmatchedstrong_noclou	Terra	All	261	77	2	0	1.01	0.61	16/ 81/ 01	02/ 88/ 09	00/ 50/ 50	00/ 00/ 00	13/ 83/ 03	0.05	0.04 + 0.10*tau	****** + *******tau	0.02 + 0.11*tau	****** + *******tau	0.27	0.03	0	-999	-999	-999
8	raw_nobuddy	Aqua	All	584	301	14	0	1.1	0.44	12/ 83/ 04	01/ 75/ 22	00/ 50/ 50	00/ 00/ 00	08/ 80/ 11	0.06	0.03 + 0.15*tau	****** + *******tau	-0.02 + 0.30*tau	****** + *******tau	0.24	0	0	-999	-999	-999
8	raw_nosdcheck	Aqua	All	583	296	15	0	1.1	0.45	12/ 83/ 03	01/ 76/ 21	00/ 53/ 46	00/ 00/ 00	08/ 80/ 10	0.06	0.05 + 0.09*tau	****** + *******tau	-0.02 + 0.28*tau	****** + *******tau	0.24	0	0	-999	-999	-999
8	raw	Aqua	All	573	286	12	0	1.1	0.42	09/ 86/ 03	02/ 76/ 21	00/ 50/ 50	00/ 00/ 00	07/ 82/ 10	0.06	0.01 + 0.21*tau	****** + *******tau	-0.03 + 0.31*tau	****** + *******tau	0.21	0	0	-999	-999	-999
8	raw_fqa	Aqua	All	408	127	5	0	1.05	0.43	16/ 81/ 01	00/ 84/ 14	00/ 40/ 60	00/ 00/ 00	12/ 81/ 05	0.06	0.00 + 0.26*tau	****** + *******tau	-0.05 + 0.35*tau	****** + *******tau	0.22	0	0	-999	-999	-999
8	raw_fqa_nocloud	Aqua	All	377	100	3	0	1.02	0.58	20/ 77/ 01	03/ 90/ 07	00/ 33/ 66	00/ 00/ 00	16/ 80/ 03	0.05	-0.01 + 0.31*tau	****** + *******tau	-0.02 + 0.25*tau	****** + *******tau	0.23	0	0	-999	-999	-999
8	nocorr_fmatchedweak	Aqua	All	410	125	5	0	1.05	0.43	16/ 81/ 01	00/ 84/ 15	00/ 40/ 60	00/ 00/ 00	12/ 81/ 05	0.06	0.00 + 0.26*tau	****** + *******tau	-0.05 + 0.35*tau	****** + *******tau	0.22	0	0	-999	-999	-999
8	nocorr_fmatchedweak_nocloud	Aqua	All	380	97	3	0	1.03	0.58	20/ 77/ 01	03/ 89/ 07	00/ 33/ 66	00/ 00/ 00	17/ 79/ 03	0.05	-0.01 + 0.31*tau	****** + *******tau	-0.02 + 0.24*tau	****** + *******tau	0.23	0	0	-999	-999	-999
8	nocorr_fmatchedstrong	Aqua	All	348	99	4	0	1	0.38	21/ 77/ 01	02/ 82/ 15	00/ 75/ 25	00/ 00/ 00	17/ 78/ 04	0.06	0.03 + 0.20*tau	****** + *******tau	-0.07 + 0.43*tau	****** + *******tau	0.22	0	0	-999	-999	-999
8	nocorr_fmatchedstrong_noclo	Aqua	All	306	79	1	0	0.97	0.54	26/ 71/ 01	01/ 91/ 07	00/100/ 00	00/ 00/ 00	21/ 75/ 02	0.06	0.01 + 0.23*tau	****** + *******tau	0.02 + 0.09*tau	****** + *******tau	0.23	0	0	-999	-999	-999
8	nocorr_fclimweak	Aqua	All	404	112	6	0	1.04	0.43	20/ 78/ 01	00/ 85/ 13	00/ 33/ 66	00/ 00/ 00	16/ 79/ 04	0.06	0.06 + 0.08*tau	****** + *******tau	-0.02 + 0.27*tau	****** + *******tau	0.23	0	0	-999	-999	-999
8	nocorr_fclimweak_nocloud	Aqua	All	369	86	3	0	1.02	0.63	24/ 74/ 01	00/ 94/ 05	00/ 33/ 66	00/ 00/ 00	19/ 77/ 02	0.06	0.01 + 0.27*tau	****** + *******tau	-0.03 + 0.26*tau	****** + *******tau	0.23	0	0	-999	-999	-999
8	nocorr_fclimstrong	Aqua	All	278	79	3	0	1	0.45	23/ 75/ 01	01/ 91/ 07	00/ 33/ 66	00/ 00/ 00	18/ 78/ 03	0.06	0.05 + 0.10*tau	****** + *******tau	-0.05 + 0.37*tau	****** + *******tau	0.26	0	0	-999	-999	-999
8	nocorr_fclimstrong_nocloud	Aqua	All	234	58	1	0	0.98	0.65	28/ 70/ 01	00/ 96/ 03	00/ 00/100	00/ 00/ 00	22/ 75/ 02	0.06	0.02 + 0.19*tau	****** + *******tau	-0.04 + 0.31*tau	****** + *******tau	0.26	0	0	-999	-999	-999
8	albcorr_fmatchedweak	Aqua	All	391	146	5	0	1.07	0.46	14/ 80/ 05	01/ 80/ 18	00/ 40/ 60	00/ 00/ 00	11/ 79/ 09	0.06	0.04 + 0.10*tau	****** + *******tau	-0.02 + 0.25*tau	****** + *******tau	0.21	0	0	-999	-999	-999
8	albcorr_fmatchedweak_noclou	Aqua	All	365	113	3	0	1.05	0.59	17/ 80/ 02	02/ 85/ 11	00/ 33/ 66	00/ 00/ 00	13/ 81/ 04	0.05	-0.04 + 0.39*tau	****** + *******tau	0.02 + 0.14*tau	****** + *******tau	0.21	0	0	-999	-999	-999
8	albcorr_fmatchedstrong	Aqua	All	320	128	4	0	1.06	0.43	09/ 83/ 06	01/ 77/ 21	00/ 75/ 25	00/ 00/ 00	07/ 81/ 10	0.06	0.06 + 0.06*tau	****** + *******tau	-0.00 + 0.21*tau	****** + *******tau	0.19	0	0	-999	-999	-999
8	albcorr_fmatchedstrong_nocl	Aqua	All	286	99	1	0	1.02	0.51	12/ 84/ 03	01/ 84/ 14	00/100/ 00	00/ 00/ 00	09/ 84/ 06	0.05	0.00 + 0.24*tau	****** + *******tau	0.02 + 0.13*tau	****** + *******tau	0.19	0	0	-999	-999	-999
8	albcorr_fclimweak	Aqua	All	375	142	6	0	1.1	0.44	12/ 81/ 05	01/ 77/ 21	00/ 33/ 66	00/ 00/ 00	09/ 80/ 10	0.06	0.03 + 0.17*tau	****** + *******tau	-0.03 + 0.32*tau	****** + *******tau	0.2	0	0	-999	-999	-999
8	albcorr_fclimweak_nocloud	Aqua	All	343	113	3	0	1.07	0.57	12/ 84/ 02	01/ 84/ 14	00/ 33/ 66	00/ 00/ 00	09/ 84/ 05	0.05	-0.02 + 0.34*tau	****** + *******tau	-0.02 + 0.24*tau	****** + *******tau	0.21	0	0	-999	-999	-999
8	albcorr_fclimstrong	Aqua	All	256	103	3	0	1.09	0.48	08/ 85/ 06	00/ 80/ 18	00/ 33/ 66	00/ 00/ 00	06/ 83/ 10	0.06	0.03 + 0.14*tau	****** + *******tau	-0.02 + 0.27*tau	****** + *******tau	0.23	0	0	-999	-999	-999
8	albcorr_fclimstrong_nocloud	Aqua	All	218	75	1	0	1.06	0.64	10/ 85/ 03	00/ 89/ 10	00/ 00/100	00/ 00/ 00	07/ 86/ 05	0.05	0.02 + 0.15*tau	****** + *******tau	-0.02 + 0.25*tau	****** + *******tau	0.23	0	0	-999	-999	-999
8	corr1_fclimweak	Aqua	All	364	151	7	0	1.15	0.45	12/ 81/ 05	01/ 76/ 21	00/ 28/ 71	00/ 00/ 00	09/ 79/ 11	0.06	0.05 + 0.10*tau	****** + *******tau	-0.05 + 0.39*tau	****** + *******tau	0.21	0	0	-999	-999	-999
8	corr1_fclimweak_nocloud	Aqua	All	337	117	4	0	1.12	0.58	12/ 84/ 02	00/ 82/ 17	00/ 25/ 75	00/ 00/ 00	09/ 83/ 06	0.05	-0.01 + 0.32*tau	****** + *******tau	-0.03 + 0.30*tau	****** + *******tau	0.22	0	0	-999	-999	-999
8	corr1_fclimstrong	Aqua	All	249	108	3	0	1.13	0.48	08/ 85/ 06	01/ 76/ 21	00/ 33/ 66	00/ 00/ 00	06/ 82/ 11	0.06	0.02 + 0.17*tau	****** + *******tau	-0.06 + 0.42*tau	****** + *******tau	0.25	0	0	-999	-999	-999
8	corr1_fclimstrong_nocloud	Aqua	All	211	82	1	0	1.09	0.59	09/ 86/ 03	02/ 82/ 14	00/ 00/100	00/ 00/ 00	07/ 85/ 06	0.05	0.02 + 0.18*tau	****** + *******tau	-0.01 + 0.25*tau	****** + *******tau	0.25	0	0	-999	-999	-999
8	corr2_fmatchedweak	Aqua	All	381	151	7	0	1.12	0.45	14/ 79/ 05	01/ 77/ 21	00/ 28/ 71	00/ 00/ 00	10/ 78/ 10	0.06	-0.00 + 0.27*tau	****** + *******tau	-0.03 + 0.32*tau	****** + *******tau	0.22	0	0	-999	-999	-999
8	corr2_fmatchedweak_nocloud	Aqua	All	358	117	4	0	1.09	0.56	17/ 80/ 02	02/ 82/ 14	00/ 25/ 75	00/ 00/ 00	13/ 80/ 06	0.05	-0.01 + 0.31*tau	****** + *******tau	-0.01 + 0.22*tau	****** + *******tau	0.22	0	0	-999	-999	-999
8	corr2_fmatchedstrong	Aqua	All	314	133	5	0	1.11	0.46	09/ 83/ 06	01/ 76/ 21	00/ 40/ 60	00/ 00/ 00	07/ 81/ 11	0.06	0.06 + 0.05*tau	****** + *******tau	-0.02 + 0.26*tau	****** + *******tau	0.19	0	0	-999	-999	-999
8	corr2_fmatchedstrong_noclou	Aqua	All	281	104	1	0	1.07	0.53	12/ 84/ 03	00/ 81/ 17	00/100/ 00	00/ 00/ 00	09/ 83/ 06	0.05	0.01 + 0.21*tau	****** + *******tau	0.01 + 0.16*tau	****** + *******tau	0.19	0	0	-999	-999	-999
9	raw_nobuddy	Terra	All	2695	3255	777	89	0.77	0.52	36/ 51/ 11	27/ 56/ 16	23/ 57/ 18	04/ 53/ 41	30/ 54/ 14	0.12	0.03 + 0.25*tau	-0.21 + 0.44*tau	0.07 + 0.20*tau	-0.48 + 0.49*tau	0.24	0.06	0.01	0.638	0.459	0.519
9	raw_nosdcheck	Terra	All	2685	3169	746	86	0.77	0.52	36/ 51/ 11	27/ 56/ 15	23/ 58/ 17	04/ 53/ 41	30/ 54/ 14	0.12	0.03 + 0.25*tau	-0.20 + 0.44*tau	0.08 + 0.19*tau	-0.43 + 0.47*tau	0.23	0.06	0.01	0.634	0.444	0.516
9	raw	Terra	All	2512	2971	674	75	0.77	0.54	36/ 52/ 10	28/ 57/ 13	25/ 60/ 14	04/ 54/ 41	31/ 55/ 13	0.11	0.03 + 0.26*tau	0.45 + 0.07*tau	0.08 + 0.18*tau	-0.23 + 0.34*tau	0.25	0.06	0.01	0.62	0.439	0.475
9	raw_fqa	Terra	All	1271	1159	277	35	0.74	0.63	36/ 54/ 09	39/ 53/ 06	32/ 59/ 07	11/ 68/ 20	36/ 54/ 08	0.08	0.03 + 0.26*tau	0.53 + -0.06*tau	0.11 + 0.14*tau	-0.09 + 0.22*tau	0.2	0.05	0.01	0.418	0.371	0.377
9	raw_fqa_nocloud	Terra	All	1197	1013	222	30	0.72	0.64	39/ 52/ 07	42/ 51/ 06	36/ 57/ 06	10/ 73/ 16	40/ 52/ 07	0.08	0.03 + 0.28*tau	0.54 + -0.07*tau	0.10 + 0.17*tau	-0.19 + 0.26*tau	0.2	0.06	0.01	0.408	0.421	0.423
9	nocorr_fmatchedweak	Terra	All	1185	1060	256	34	0.74	0.65	36/ 53/ 09	41/ 50/ 07	31/ 62/ 06	05/ 73/ 20	37/ 53/ 08	0.08	0.03 + 0.27*tau	0.56 + -0.07*tau	0.11 + 0.14*tau	-0.08 + 0.21*tau	0.2	0.06	0.01	0.421	0.381	0.384
9	nocorr_fmatchedweak_nocloud	Terra	All	1123	926	204	29	0.72	0.66	39/ 52/ 08	44/ 49/ 06	37/ 57/ 04	06/ 75/ 17	41/ 51/ 07	0.08	0.03 + 0.27*tau	0.56 + -0.07*tau	0.11 + 0.16*tau	-0.18 + 0.25*tau	0.2	0.06	0.02	0.412	0.419	0.42
9	nocorr_fmatchedstrong	Terra	All	523	482	141	16	0.72	0.65	40/ 53/ 06	50/ 45/ 04	36/ 59/ 04	12/ 68/ 18	43/ 51/ 05	0.08	0.03 + 0.27*tau	0.32 + 0.06*tau	0.15 + 0.11*tau	****** + *******tau	0.17	0.05	0.02	0.361	0.342	0.342
9	nocorr_fmatchedstrong_noclo	Terra	All	476	409	112	13	0.7	0.67	44/ 51/ 03	55/ 41/ 02	36/ 60/ 02	15/ 69/ 15	47/ 48/ 03	0.07	0.03 + 0.29*tau	0.35 + 0.05*tau	0.15 + 0.11*tau	****** + *******tau	0.16	0.05	0.02	0.383	0.362	0.362
9	nocorr_fclimweak	Terra	All	1103	998	251	33	0.73	0.66	35/ 56/ 08	42/ 50/ 07	33/ 61/ 05	12/ 66/ 21	37/ 54/ 07	0.08	0.03 + 0.27*tau	0.45 + -0.01*tau	0.12 + 0.13*tau	-0.07 + 0.22*tau	0.2	0.05	0.01	0.429	0.355	0.363
9	nocorr_fclimweak_nocloud	Terra	All	1045	854	198	28	0.71	0.67	38/ 53/ 07	45/ 48/ 06	38/ 56/ 05	07/ 75/ 17	41/ 51/ 06	0.08	0.04 + 0.27*tau	0.52 + -0.05*tau	0.13 + 0.13*tau	****** + *******tau	0.19	0.06	0.02	0.419	0.365	0.365
9	nocorr_fclimstrong	Terra	All	299	318	93	17	0.72	0.67	48/ 47/ 04	49/ 48/ 01	34/ 62/ 03	17/ 64/ 17	46/ 50/ 03	0.08	0.03 + 0.26*tau	****** + *******tau	0.12 + 0.13*tau	****** + *******tau	0.16	0.03	0.01	0.339	0.344	0.344
9	nocorr_fclimstrong_nocloud	Terra	All	278	279	76	12	0.71	0.68	52/ 44/ 03	53/ 45/ 01	35/ 60/ 03	16/ 66/ 16	50/ 47/ 02	0.08	0.05 + 0.25*tau	****** + *******tau	0.14 + 0.13*tau	****** + *******tau	0.15	0.03	0.01	0.349	0.343	0.343
9	albcorr_fmatchedweak	Terra	All	1262	987	252	34	0.73	0.65	47/ 44/ 08	45/ 47/ 06	32/ 61/ 05	05/ 73/ 20	44/ 47/ 07	0.08	0.05 + 0.25*tau	0.56 + -0.07*tau	0.13 + 0.12*tau	-0.08 + 0.21*tau	0.23	0.1	0.05	0.421	0.362	0.369
9	albcorr_fmatchedweak_noclou	Terra	All	1196	851	204	29	0.71	0.67	50/ 43/ 06	47/ 45/ 06	38/ 57/ 04	06/ 75/ 17	48/ 45/ 06	0.08	0.05 + 0.26*tau	0.55 + -0.07*tau	0.13 + 0.14*tau	0.04 + 0.13*tau	0.24	0.11	0.06	0.412	0.397	0.397
9	albcorr_fmatchedstrong	Terra	All	497	510	141	16	0.73	0.66	29/ 61/ 08	44/ 50/ 05	36/ 59/ 04	12/ 68/ 18	36/ 56/ 07	0.08	0.01 + 0.30*tau	0.35 + 0.04*tau	0.13 + 0.13*tau	****** + *******tau	0.16	0.03	0.01	0.361	0.363	0.363
9	albcorr_fmatchedstrong_nocl	Terra	All	452	434	112	13	0.71	0.68	32/ 61/ 06	48/ 47/ 03	36/ 60/ 02	15/ 69/ 15	39/ 55/ 04	0.07	0.02 + 0.30*tau	0.45 + -0.01*tau	0.13 + 0.13*tau	****** + *******tau	0.16	0.03	0.01	0.383	0.378	0.378
9	albcorr_fclimweak	Terra	All	1115	975	259	33	0.74	0.66	39/ 51/ 08	42/ 49/ 07	31/ 63/ 05	06/ 69/ 24	39/ 52/ 08	0.08	0.04 + 0.25*tau	0.28 + 0.09*tau	0.12 + 0.11*tau	-0.57 + 0.49*tau	0.21	0.07	0.03	0.422	0.336	0.404
9	albcorr_fclimweak_nocloud	Terra	All	1058	834	201	28	0.72	0.68	43/ 49/ 07	46/ 47/ 06	36/ 58/ 04	07/ 71/ 21	43/ 49/ 06	0.08	0.05 + 0.25*tau	0.58 + -0.09*tau	0.12 + 0.14*tau	0.12 + 0.07*tau	0.21	0.08	0.04	0.414	0.378	0.378
9	albcorr_fclimstrong	Terra	All	263	349	100	17	0.74	0.69	31/ 63/ 04	39/ 57/ 02	33/ 64/ 03	11/ 70/ 17	35/ 60/ 03	0.07	0.02 + 0.25*tau	****** + *******tau	0.10 + 0.15*tau	****** + *******tau	0.14	0.01	0	0.333	0.355	0.355
9	albcorr_fclimstrong_nocloud	Terra	All	246	305	82	13	0.73	0.69	34/ 60/ 04	43/ 54/ 01	34/ 62/ 03	15/ 69/ 15	38/ 57/ 03	0.07	0.02 + 0.26*tau	****** + *******tau	0.11 + 0.14*tau	****** + *******tau	0.14	0.01	0	0.331	0.345	0.345
9	corr1_fclimweak	Terra	All	1115	975	259	33	0.74	0.66	39/ 51/ 08	42/ 49/ 07	31/ 63/ 05	06/ 69/ 24	39/ 52/ 08	0.08	0.04 + 0.25*tau	0.28 + 0.09*tau	0.12 + 0.11*tau	-0.57 + 0.49*tau	0.21	0.07	0.03	0.422	0.336	0.404
9	corr1_fclimweak_nocloud	Terra	All	1058	834	201	28	0.72	0.68	43/ 49/ 07	46/ 47/ 06	36/ 58/ 04	07/ 71/ 21	43/ 49/ 06	0.08	0.05 + 0.25*tau	0.58 + -0.09*tau	0.12 + 0.14*tau	0.12 + 0.07*tau	0.21	0.08	0.04	0.414	0.378	0.378
9	corr1_fclimstrong	Terra	All	263	349	100	17	0.74	0.69	31/ 63/ 04	39/ 57/ 02	33/ 64/ 03	11/ 70/ 17	35/ 60/ 03	0.07	0.02 + 0.25*tau	****** + *******tau	0.10 + 0.15*tau	****** + *******tau	0.14	0.01	0	0.333	0.355	0.355
9	corr1_fclimstrong_nocloud	Terra	All	246	305	82	13	0.73	0.69	34/ 60/ 04	43/ 54/ 01	34/ 62/ 03	15/ 69/ 15	38/ 57/ 03	0.07	0.02 + 0.26*tau	****** + *******tau	0.11 + 0.14*tau	****** + *******tau	0.14	0.01	0	0.331	0.345	0.345
9	corr2_fmatchedweak	Terra	All	1262	987	252	34	0.73	0.65	47/ 44/ 08	45/ 47/ 06	32/ 61/ 05	05/ 73/ 20	44/ 47/ 07	0.08	0.05 + 0.25*tau	0.56 + -0.07*tau	0.13 + 0.12*tau	-0.08 + 0.21*tau	0.23	0.1	0.05	0.421	0.362	0.369
9	corr2_fmatchedweak_nocloud	Terra	All	1196	851	204	29	0.71	0.67	50/ 43/ 06	47/ 45/ 06	38/ 57/ 04	06/ 75/ 17	48/ 45/ 06	0.08	0.05 + 0.26*tau	0.55 + -0.07*tau	0.13 + 0.14*tau	0.04 + 0.13*tau	0.24	0.11	0.06	0.412	0.397	0.397
9	corr2_fmatchedstrong	Terra	All	497	510	141	16	0.73	0.66	29/ 61/ 08	44/ 50/ 05	36/ 59/ 04	12/ 68/ 18	36/ 56/ 07	0.08	0.01 + 0.30*tau	0.35 + 0.04*tau	0.13 + 0.13*tau	****** + *******tau	0.16	0.03	0.01	0.361	0.363	0.363
9	corr2_fmatchedstrong_noclou	Terra	All	452	434	112	13	0.71	0.68	32/ 61/ 06	48/ 47/ 03	36/ 60/ 02	15/ 69/ 15	39/ 55/ 04	0.07	0.02 + 0.30*tau	0.45 + -0.01*tau	0.13 + 0.13*tau	****** + *******tau	0.16	0.03	0.01	0.383	0.378	0.378
9	raw_nobuddy	Aqua	All	2354	3235	675	64	0.77	0.51	33/ 54/ 11	25/ 57/ 17	24/ 58/ 17	03/ 71/ 25	28/ 56/ 15	0.13	0.02 + 0.28*tau	0.19 + 0.18*tau	0.07 + 0.20*tau	-0.23 + 0.29*tau	0.26	0.05	0.02	0.539	0.49	0.492
9	raw_nosdcheck	Aqua	All	2309	3152	641	62	0.76	0.52	33/ 54/ 11	25/ 57/ 16	24/ 59/ 15	03/ 72/ 24	28/ 56/ 14	0.13	0.02 + 0.28*tau	0.31 + 0.10*tau	0.08 + 0.20*tau	-0.12 + 0.23*tau	0.25	0.05	0.02	0.529	0.482	0.482
9	raw	Aqua	All	2151	2934	581	55	0.76	0.54	31/ 56/ 11	26/ 58/ 15	25/ 60/ 13	00/ 76/ 23	28/ 58/ 13	0.12	0.02 + 0.28*tau	0.06 + 0.25*tau	0.08 + 0.19*tau	-0.30 + 0.30*tau	0.26	0.05	0.01	0.506	0.469	0.471
9	raw_fqa	Aqua	All	1020	1095	242	34	0.72	0.63	30/ 61/ 08	33/ 57/ 09	33/ 61/ 04	00/ 73/ 26	31/ 59/ 08	0.08	0.00 + 0.32*tau	-0.39 + 0.49*tau	0.09 + 0.19*tau	-0.32 + 0.33*tau	0.22	0.04	0.01	0.463	0.454	0.466
9	raw_fqa_nocloud	Aqua	All	968	962	199	25	0.72	0.65	32/ 61/ 06	36/ 55/ 07	35/ 58/ 06	00/ 92/ 08	34/ 58/ 06	0.07	0.00 + 0.33*tau	0.33 + 0.04*tau	0.09 + 0.20*tau	****** + *******tau	0.22	0.06	0.01	0.306	0.468	0.468
9	nocorr_fmatchedweak	Aqua	All	958	1026	240	32	0.72	0.63	30/ 60/ 08	34/ 56/ 08	34/ 60/ 05	00/ 78/ 21	32/ 58/ 08	0.08	-0.00 + 0.32*tau	-0.20 + 0.35*tau	0.08 + 0.20*tau	-0.21 + 0.26*tau	0.22	0.04	0.01	0.354	0.459	0.459
9	nocorr_fmatchedweak_nocloud	Aqua	All	904	899	195	24	0.72	0.66	33/ 60/ 06	38/ 54/ 07	35/ 57/ 06	00/ 91/ 08	35/ 57/ 06	0.07	0.00 + 0.33*tau	0.33 + 0.04*tau	0.09 + 0.20*tau	****** + *******tau	0.21	0.06	0.01	0.297	0.471	0.471
9	nocorr_fmatchedstrong	Aqua	All	465	404	129	14	0.69	0.59	35/ 57/ 06	51/ 44/ 04	35/ 58/ 05	07/ 78/ 14	41/ 52/ 05	0.07	0.01 + 0.32*tau	-0.49 + 0.57*tau	0.15 + 0.13*tau	****** + *******tau	0.19	0.04	0.01	0.546	0.406	0.406
9	nocorr_fmatchedstrong_noclo	Aqua	All	405	357	94	11	0.69	0.65	40/ 55/ 04	52/ 42/ 04	40/ 54/ 05	09/ 90/ 00	44/ 50/ 04	0.07	0.02 + 0.33*tau	****** + *******tau	0.15 + 0.13*tau	****** + *******tau	0.18	0.04	0.02	0.293	0.391	0.391
9	nocorr_fclimweak	Aqua	All	905	962	225	30	0.72	0.63	29/ 62/ 08	36/ 55/ 07	34/ 60/ 05	00/ 80/ 20	32/ 59/ 07	0.07	-0.00 + 0.33*tau	-0.64 + 0.62*tau	0.09 + 0.19*tau	-0.58 + 0.48*tau	0.21	0.04	0.01	0.44	0.455	0.486
9	nocorr_fclimweak_nocloud	Aqua	All	835	841	187	24	0.71	0.66	31/ 61/ 06	39/ 53/ 06	37/ 56/ 05	00/ 95/ 04	35/ 58/ 06	0.07	-0.00 + 0.34*tau	0.05 + 0.18*tau	0.09 + 0.21*tau	****** + *******tau	0.21	0.06	0.02	0.253	0.453	0.453
9	nocorr_fclimstrong	Aqua	All	288	261	94	9	0.7	0.62	42/ 52/ 05	44/ 51/ 03	35/ 62/ 02	11/ 55/ 33	41/ 53/ 04	0.07	0.04 + 0.26*tau	****** + *******tau	0.13 + 0.14*tau	****** + *******tau	0.17	0.05	0.02	-999	-999	-999
9	nocorr_fclimstrong_nocloud	Aqua	All	254	231	66	5	0.71	0.72	46/ 50/ 02	48/ 48/ 03	40/ 57/ 01	20/ 60/ 20	46/ 50/ 03	0.07	0.03 + 0.28*tau	****** + *******tau	0.12 + 0.16*tau	****** + *******tau	0.16	0.05	0.02	-999	-999	-999
9	albcorr_fmatchedweak	Aqua	All	1056	924	240	32	0.71	0.62	38/ 53/ 07	40/ 51/ 08	34/ 60/ 05	00/ 78/ 21	38/ 53/ 07	0.08	0.02 + 0.30*tau	-0.83 + 0.72*tau	0.11 + 0.17*tau	-0.26 + 0.28*tau	0.25	0.08	0.05	0.354	0.432	0.436
9	albcorr_fmatchedweak_noclou	Aqua	All	1002	800	194	24	0.71	0.65	42/ 51/ 05	43/ 49/ 06	36/ 57/ 06	00/ 91/ 08	41/ 51/ 06	0.08	0.02 + 0.31*tau	0.26 + 0.07*tau	0.11 + 0.17*tau	****** + *******tau	0.24	0.1	0.05	0.297	0.441	0.441
9	albcorr_fmatchedstrong	Aqua	All	437	432	129	14	0.7	0.61	24/ 65/ 09	46/ 47/ 05	35/ 58/ 05	07/ 78/ 14	35/ 57/ 07	0.07	0.00 + 0.33*tau	-0.49 + 0.57*tau	0.13 + 0.16*tau	****** + *******tau	0.18	0.02	0.01	0.546	0.437	0.437
9	albcorr_fmatchedstrong_nocl	Aqua	All	378	385	94	11	0.7	0.66	29/ 63/ 07	48/ 47/ 04	40/ 54/ 05	09/ 90/ 00	38/ 55/ 05	0.06	0.01 + 0.33*tau	****** + *******tau	0.13 + 0.16*tau	****** + *******tau	0.17	0.02	0.01	0.293	0.416	0.416
9	albcorr_fclimweak	Aqua	All	928	932	232	30	0.72	0.63	30/ 61/ 07	37/ 55/ 07	37/ 56/ 05	00/ 80/ 20	33/ 58/ 07	0.08	0.00 + 0.31*tau	-0.64 + 0.61*tau	0.10 + 0.18*tau	-0.58 + 0.48*tau	0.22	0.06	0.03	0.441	0.436	0.474
9	albcorr_fclimweak_nocloud	Aqua	All	863	807	190	24	0.72	0.66	35/ 58/ 05	40/ 53/ 06	40/ 54/ 05	00/ 95/ 04	37/ 56/ 05	0.07	0.01 + 0.31*tau	0.51 + -0.08*tau	0.10 + 0.19*tau	****** + *******tau	0.21	0.08	0.03	0.25	0.427	0.427
9	albcorr_fclimstrong	Aqua	All	258	281	101	10	0.72	0.64	28/ 63/ 07	39/ 54/ 05	31/ 63/ 04	10/ 60/ 30	33/ 59/ 06	0.07	0.01 + 0.27*tau	****** + *******tau	0.10 + 0.16*tau	****** + *******tau	0.15	0.02	0.01	-999	-999	-999
9	albcorr_fclimstrong_nocloud	Aqua	All	229	245	75	7	0.73	0.73	30/ 64/ 05	41/ 54/ 04	37/ 58/ 04	14/ 71/ 14	35/ 59/ 04	0.06	0.01 + 0.29*tau	****** + *******tau	0.09 + 0.18*tau	****** + *******tau	0.14	0.01	0	-999	-999	-999
9	corr1_fclimweak	Aqua	All	982	934	187	22	0.67	0.64	31/ 60/ 07	48/ 46/ 05	48/ 47/ 04	09/ 77/ 13	40/ 53/ 06	0.07	-0.01 + 0.37*tau	-0.20 + 0.41*tau	0.11 + 0.23*tau	****** + *******tau	0.21	0.06	0.03	0.432	0.536	0.536
9	corr1_fclimweak_nocloud	Aqua	All	907	814	153	16	0.66	0.67	36/ 58/ 05	51/ 44/ 04	52/ 44/ 03	25/ 75/ 00	43/ 51/ 04	0.07	-0.00 + 0.38*tau	0.53 + -0.04*tau	0.11 + 0.25*tau	****** + *******tau	0.2	0.08	0.03	0.32	0.535	0.535
9	corr1_fclimstrong	Aqua	All	276	292	79	5	0.67	0.61	28/ 63/ 07	51/ 45/ 03	37/ 59/ 02	40/ 60/ 00	39/ 55/ 04	0.07	0.01 + 0.32*tau	****** + *******tau	0.13 + 0.18*tau	****** + *******tau	0.15	0.02	0.01	-999	-999	-999
9	corr1_fclimstrong_nocloud	Aqua	All	243	253	57	4	0.67	0.72	30/ 65/ 04	52/ 44/ 02	50/ 49/ 00	50/ 50/ 00	42/ 54/ 03	0.06	0.01 + 0.34*tau	****** + *******tau	0.09 + 0.28*tau	****** + *******tau	0.14	0.01	0	-999	-999	-999
9	corr2_fmatchedweak	Aqua	All	1109	932	195	23	0.66	0.62	40/ 52/ 07	52/ 42/ 05	47/ 46/ 06	13/ 82/ 04	45/ 48/ 06	0.08	0.01 + 0.36*tau	0.08 + 0.24*tau	0.13 + 0.20*tau	****** + *******tau	0.23	0.08	0.04	0.344	0.497	0.497
9	corr2_fmatchedweak_nocloud	Aqua	All	1047	805	156	18	0.65	0.65	43/ 50/ 05	54/ 41/ 04	54/ 41/ 04	16/ 83/ 00	48/ 46/ 04	0.07	0.01 + 0.37*tau	0.65 + -0.12*tau	0.12 + 0.23*tau	****** + *******tau	0.23	0.1	0.05	0.315	0.544	0.544
9	corr2_fmatchedstrong	Aqua	All	458	440	106	9	0.64	0.62	26/ 64/ 09	59/ 37/ 03	50/ 45/ 03	22/ 66/ 11	43/ 50/ 06	0.06	-0.01 + 0.38*tau	-0.65 + 0.71*tau	0.14 + 0.22*tau	****** + *******tau	0.17	0.02	0.01	-999	-999	-999
9	corr2_fmatchedstrong_noclou	Aqua	All	397	382	82	7	0.64	0.67	30/ 61/ 07	60/ 36/ 03	58/ 37/ 03	28/ 71/ 00	46/ 48/ 05	0.06	-0.00 + 0.39*tau	****** + *******tau	0.14 + 0.23*tau	****** + *******tau	0.15	0.02	0.01	-999	-999	-999
10	raw_nobuddy	Terra	All	10	48	21	0	1.48	0.72	00/ 30/ 70	00/ 27/ 72	00/ 14/ 85	00/ 00/ 00	00/ 24/ 75	0.17	****** + *******tau	****** + *******tau	****** + *******tau	****** + *******tau	0.05	0	0	-999	-999	-999
10	raw_nosdcheck	Terra	All	9	48	20	0	1.47	0.73	00/ 33/ 66	00/ 27/ 72	00/ 15/ 85	00/ 00/ 00	00/ 24/ 75	0.18	****** + *******tau	****** + *******tau	****** + *******tau	****** + *******tau	0.04	0	0	-999	-999	-999
10	raw	Terra	All	5	36	6	0	1.41	0.54	00/ 40/ 60	00/ 30/ 69	00/ 16/ 83	00/ 00/ 00	00/ 29/ 70	0.18	****** + *******tau	****** + *******tau	****** + *******tau	****** + *******tau	0.09	0	0	-999	-999	-999
10	raw_fqa	Terra	All	0	2	0	0	-999	-999	00/ 00/ 00	00/ 50/ 50	00/ 00/ 00	00/ 00/ 00	00/ 50/ 50	0.14	****** + *******tau	****** + *******tau	****** + *******tau	****** + *******tau	0.1	0	0	-999	-999	-999
10	raw_fqa_nocloud	Terra	All	0	2	0	0	-999	-999	00/ 00/ 00	00/ 50/ 50	00/ 00/ 00	00/ 00/ 00	00/ 50/ 50	0.14	****** + *******tau	****** + *******tau	****** + *******tau	****** + *******tau	0.1	0	0	-999	-999	-999
10	nocorr_fmatchedweak	Terra	All	0	2	0	0	-999	-999	00/ 00/ 00	00/ 50/ 50	00/ 00/ 00	00/ 00/ 00	00/ 50/ 50	0.14	****** + *******tau	****** + *******tau	****** + *******tau	****** + *******tau	0.1	0	0	-999	-999	-999
10	nocorr_fmatchedweak_nocloud	Terra	All	0	2	0	0	-999	-999	00/ 00/ 00	00/ 50/ 50	00/ 00/ 00	00/ 00/ 00	00/ 50/ 50	0.14	****** + *******tau	****** + *******tau	****** + *******tau	****** + *******tau	0.1	0	0	-999	-999	-999
10	albcorr_fmatchedweak	Terra	All	1	1	0	0	-999	-999	00/100/ 00	00/ 00/100	00/ 00/ 00	00/ 00/ 00	00/ 50/ 50	0.09	****** + *******tau	****** + *******tau	****** + *******tau	****** + *******tau	0.15	0	0	-999	-999	-999
10	albcorr_fmatchedweak_noclou	Terra	All	1	1	0	0	-999	-999	00/100/ 00	00/ 00/100	00/ 00/ 00	00/ 00/ 00	00/ 50/ 50	0.09	****** + *******tau	****** + *******tau	****** + *******tau	****** + *******tau	0.15	0	0	-999	-999	-999
10	corr2_fmatchedweak	Terra	All	1	1	0	0	-999	-999	00/100/ 00	00/ 00/100	00/ 00/ 00	00/ 00/ 00	00/ 50/ 50	0.18	****** + *******tau	****** + *******tau	****** + *******tau	****** + *******tau	0.15	0	0	-999	-999	-999
10	corr2_fmatchedweak_nocloud	Terra	All	1	1	0	0	-999	-999	00/100/ 00	00/ 00/100	00/ 00/ 00	00/ 00/ 00	00/ 50/ 50	0.18	****** + *******tau	****** + *******tau	****** + *******tau	****** + *******tau	0.15	0	0	-999	-999	-999
10	raw_nobuddy	Aqua	All	3	25	3	0	1.42	0.42	00/ 33/ 66	00/ 36/ 64	00/ 00/100	00/ 00/ 00	00/ 32/ 67	0.2	****** + *******tau	****** + *******tau	****** + *******tau	****** + *******tau	0.16	0	0	-999	-999	-999
10	raw_nosdcheck	Aqua	All	3	25	3	0	1.42	0.41	00/ 33/ 66	00/ 36/ 64	00/ 00/100	00/ 00/ 00	00/ 32/ 67	0.2	****** + *******tau	****** + *******tau	****** + *******tau	****** + *******tau	0.18	0	0	-999	-999	-999
10	raw	Aqua	All	3	17	2	0	1.39	0.5	00/ 33/ 66	00/ 35/ 64	00/ 00/100	00/ 00/ 00	00/ 31/ 68	0.2	****** + *******tau	****** + *******tau	****** + *******tau	****** + *******tau	0.14	0	0	-999	-999	-999
11	raw_nobuddy	Terra	All	11728	6484	364	3	1.13	0.37	09/ 82/ 08	03/ 58/ 38	01/ 28/ 69	00/ 00/100	06/ 73/ 19	0.08	0.02 + 0.25*tau	****** + *******tau	-0.02 + 0.37*tau	****** + *******tau	0.31	0.07	0.02	-999	-999	-999
11	raw_nosdcheck	Terra	All	11662	6356	347	2	1.12	0.37	09/ 82/ 07	03/ 59/ 37	01/ 30/ 68	00/ 00/100	06/ 73/ 19	0.08	0.02 + 0.22*tau	****** + *******tau	-0.01 + 0.35*tau	****** + *******tau	0.31	0.07	0.02	-999	-999	-999
11	raw	Terra	All	11233	6016	311	1	1.11	0.39	08/ 83/ 07	03/ 60/ 35	01/ 33/ 64	00/ 00/100	06/ 75/ 18	0.08	0.02 + 0.22*tau	****** + *******tau	-0.01 + 0.35*tau	****** + *******tau	0.31	0.07	0.01	-999	-999	-999
11	raw_fqa	Terra	All	8386	3392	166	1	1.04	0.45	10/ 84/ 04	04/ 70/ 24	01/ 42/ 56	00/ 00/100	08/ 80/ 10	0.06	0.01 + 0.24*tau	****** + *******tau	-0.01 + 0.29*tau	****** + *******tau	0.28	0.08	0.02	-999	-999	-999
11	raw_fqa_nocloud	Terra	All	7967	2974	139	1	1.03	0.47	11/ 84/ 04	05/ 72/ 22	00/ 45/ 53	00/ 00/100	09/ 80/ 09	0.06	0.01 + 0.23*tau	****** + *******tau	-0.00 + 0.26*tau	****** + *******tau	0.28	0.08	0.02	-999	-999	-999
11	nocorr_fmatchedweak	Terra	All	8071	3245	159	1	1.04	0.46	10/ 84/ 04	04/ 71/ 23	01/ 43/ 55	00/ 00/100	09/ 80/ 10	0.06	0.01 + 0.25*tau	****** + *******tau	-0.01 + 0.30*tau	****** + *******tau	0.27	0.08	0.02	-999	-999	-999
11	nocorr_fmatchedweak_nocloud	Terra	All	7688	2846	132	1	1.02	0.47	11/ 84/ 03	05/ 73/ 21	00/ 45/ 53	00/ 00/100	09/ 81/ 08	0.06	0.01 + 0.25*tau	****** + *******tau	-0.01 + 0.28*tau	****** + *******tau	0.28	0.08	0.03	-999	-999	-999
11	nocorr_fmatchedstrong	Terra	All	6547	1962	75	0	0.98	0.4	14/ 84/ 01	06/ 76/ 17	00/ 52/ 48	00/ 00/ 00	12/ 82/ 05	0.06	-0.01 + 0.32*tau	****** + *******tau	-0.00 + 0.25*tau	****** + *******tau	0.29	0.1	0.03	-999	-999	-999
11	nocorr_fmatchedstrong_noclo	Terra	All	6125	1649	60	0	0.96	0.43	14/ 83/ 01	06/ 79/ 14	00/ 56/ 43	00/ 00/ 00	13/ 82/ 04	0.05	-0.01 + 0.33*tau	****** + *******tau	0.01 + 0.22*tau	****** + *******tau	0.29	0.1	0.04	-999	-999	-999
11	nocorr_fclimweak	Terra	All	8076	3087	148	1	1.02	0.45	11/ 85/ 03	04/ 73/ 21	01/ 45/ 52	00/ 00/100	09/ 81/ 09	0.06	0.01 + 0.25*tau	****** + *******tau	-0.02 + 0.32*tau	****** + *******tau	0.27	0.08	0.02	-999	-999	-999
11	nocorr_fclimweak_nocloud	Terra	All	7630	2700	123	1	1.01	0.47	12/ 84/ 03	05/ 76/ 18	00/ 49/ 49	00/ 00/100	10/ 82/ 07	0.06	0.01 + 0.24*tau	****** + *******tau	-0.02 + 0.30*tau	****** + *******tau	0.28	0.09	0.03	-999	-999	-999
11	nocorr_fclimstrong	Terra	All	5547	1648	66	0	0.96	0.4	15/ 83/ 01	06/ 78/ 15	01/ 54/ 43	00/ 00/ 00	13/ 82/ 04	0.06	-0.00 + 0.29*tau	****** + *******tau	-0.01 + 0.27*tau	****** + *******tau	0.29	0.11	0.04	-999	-999	-999
11	nocorr_fclimstrong_nocloud	Terra	All	5139	1371	51	0	0.94	0.45	16/ 83/ 00	07/ 80/ 12	01/ 60/ 37	00/ 00/ 00	14/ 82/ 03	0.05	-0.01 + 0.30*tau	****** + *******tau	0.01 + 0.21*tau	****** + *******tau	0.29	0.12	0.05	-999	-999	-999
11	albcorr_fmatchedweak	Terra	All	8100	3232	160	1	1.03	0.46	07/ 88/ 04	04/ 73/ 21	01/ 42/ 56	00/ 00/100	06/ 83/ 09	0.06	-0.00 + 0.27*tau	****** + *******tau	-0.02 + 0.31*tau	****** + *******tau	0.26	0.05	0.02	-999	-999	-999
11	albcorr_fmatchedweak_noclou	Terra	All	7721	2832	132	1	1.02	0.48	08/ 88/ 03	04/ 76/ 18	00/ 45/ 53	00/ 00/100	07/ 84/ 07	0.05	-0.00 + 0.26*tau	****** + *******tau	-0.02 + 0.29*tau	****** + *******tau	0.26	0.05	0.02	-999	-999	-999
11	albcorr_fmatchedstrong	Terra	All	6200	2321	75	0	1.01	0.42	07/ 89/ 03	04/ 74/ 21	00/ 52/ 48	00/ 00/ 00	06/ 85/ 08	0.05	-0.01 + 0.29*tau	****** + *******tau	-0.00 + 0.26*tau	****** + *******tau	0.24	0.02	0.01	-999	-999	-999
11	albcorr_fmatchedstrong_nocl	Terra	All	5827	1952	61	0	0.99	0.46	07/ 89/ 02	04/ 77/ 17	00/ 57/ 42	00/ 00/ 00	06/ 86/ 06	0.05	-0.01 + 0.29*tau	****** + *******tau	0.00 + 0.22*tau	****** + *******tau	0.24	0.02	0.01	-999	-999	-999
11	albcorr_fclimweak	Terra	All	7821	3361	151	1	1.04	0.46	06/ 88/ 04	03/ 73/ 22	01/ 43/ 54	00/ 00/100	05/ 83/ 10	0.06	0.01 + 0.23*tau	****** + *******tau	-0.01 + 0.30*tau	****** + *******tau	0.24	0.03	0.01	-999	-999	-999
11	albcorr_fclimweak_nocloud	Terra	All	7425	2921	125	1	1.02	0.48	07/ 89/ 03	04/ 76/ 18	00/ 46/ 52	00/ 00/100	06/ 85/ 08	0.05	-0.00 + 0.26*tau	****** + *******tau	-0.03 + 0.32*tau	****** + *******tau	0.24	0.04	0.01	-999	-999	-999
11	albcorr_fclimstrong	Terra	All	5108	2077	83	0	1.02	0.44	05/ 90/ 03	04/ 75/ 20	01/ 45/ 53	00/ 00/ 00	05/ 85/ 08	0.05	-0.00 + 0.26*tau	****** + *******tau	-0.01 + 0.27*tau	****** + *******tau	0.22	0.01	0	-999	-999	-999
11	albcorr_fclimstrong_nocloud	Terra	All	4737	1772	63	0	1	0.49	06/ 91/ 02	04/ 78/ 16	01/ 50/ 47	00/ 00/ 00	05/ 87/ 06	0.05	0.00 + 0.23*tau	****** + *******tau	0.00 + 0.22*tau	****** + *******tau	0.22	0.01	0	-999	-999	-999
11	corr1_fclimweak	Terra	All	7821	3361	151	1	1.04	0.46	06/ 88/ 04	03/ 73/ 22	01/ 43/ 54	00/ 00/100	05/ 83/ 10	0.06	0.01 + 0.23*tau	****** + *******tau	-0.01 + 0.30*tau	****** + *******tau	0.24	0.03	0.01	-999	-999	-999
11	corr1_fclimweak_nocloud	Terra	All	7425	2921	125	1	1.02	0.48	07/ 89/ 03	04/ 76/ 18	00/ 46/ 52	00/ 00/100	06/ 85/ 08	0.05	-0.00 + 0.26*tau	****** + *******tau	-0.03 + 0.32*tau	****** + *******tau	0.24	0.04	0.01	-999	-999	-999
11	corr1_fclimstrong	Terra	All	5108	2077	83	0	1.02	0.44	05/ 90/ 03	04/ 75/ 20	01/ 45/ 53	00/ 00/ 00	05/ 85/ 08	0.05	-0.00 + 0.26*tau	****** + *******tau	-0.01 + 0.27*tau	****** + *******tau	0.22	0.01	0	-999	-999	-999
11	corr1_fclimstrong_nocloud	Terra	All	4737	1772	63	0	1	0.49	06/ 91/ 02	04/ 78/ 16	01/ 50/ 47	00/ 00/ 00	05/ 87/ 06	0.05	0.00 + 0.23*tau	****** + *******tau	0.00 + 0.22*tau	****** + *******tau	0.22	0.01	0	-999	-999	-999
11	corr2_fmatchedweak	Terra	All	8100	3232	160	1	1.03	0.46	07/ 88/ 04	04/ 73/ 21	01/ 42/ 56	00/ 00/100	06/ 83/ 09	0.06	-0.00 + 0.27*tau	****** + *******tau	-0.02 + 0.31*tau	****** + *******tau	0.26	0.05	0.02	-999	-999	-999
11	corr2_fmatchedweak_nocloud	Terra	All	7721	2832	132	1	1.02	0.48	08/ 88/ 03	04/ 76/ 18	00/ 45/ 53	00/ 00/100	07/ 84/ 07	0.05	-0.00 + 0.26*tau	****** + *******tau	-0.02 + 0.29*tau	****** + *******tau	0.26	0.05	0.02	-999	-999	-999
11	corr2_fmatchedstrong	Terra	All	6200	2321	75	0	1.01	0.42	07/ 89/ 03	04/ 74/ 21	00/ 52/ 48	00/ 00/ 00	06/ 85/ 08	0.05	-0.01 + 0.29*tau	****** + *******tau	-0.00 + 0.26*tau	****** + *******tau	0.24	0.02	0.01	-999	-999	-999
11	corr2_fmatchedstrong_noclou	Terra	All	5827	1952	61	0	0.99	0.46	07/ 89/ 02	04/ 77/ 17	00/ 57/ 42	00/ 00/ 00	06/ 86/ 06	0.05	-0.01 + 0.29*tau	****** + *******tau	0.00 + 0.22*tau	****** + *******tau	0.24	0.02	0.01	-999	-999	-999
11	raw_nobuddy	Aqua	All	10043	6633	402	3	1.19	0.39	07/ 83/ 09	01/ 52/ 45	01/ 31/ 66	00/ 66/ 33	05/ 70/ 24	0.09	0.03 + 0.21*tau	****** + *******tau	-0.02 + 0.39*tau	****** + *******tau	0.33	0.08	0.04	-999	-999	-999
11	raw_nosdcheck	Aqua	All	9949	6486	390	3	1.19	0.4	07/ 83/ 09	01/ 53/ 44	01/ 32/ 65	00/ 33/ 66	05/ 70/ 24	0.09	0.04 + 0.19*tau	****** + *******tau	-0.01 + 0.37*tau	****** + *******tau	0.33	0.08	0.04	-999	-999	-999
11	raw	Aqua	All	9463	6084	342	3	1.17	0.4	06/ 84/ 08	02/ 54/ 43	01/ 33/ 64	00/ 33/ 66	04/ 71/ 23	0.09	0.03 + 0.20*tau	****** + *******tau	-0.02 + 0.37*tau	****** + *******tau	0.33	0.08	0.02	-999	-999	-999
11	raw_fqa	Aqua	All	6702	3223	156	2	1.07	0.45	08/ 86/ 04	03/ 66/ 29	02/ 42/ 54	00/ 50/ 50	07/ 79/ 13	0.06	0.02 + 0.22*tau	****** + *******tau	-0.01 + 0.31*tau	****** + *******tau	0.28	0.08	0.03	-999	-999	-999
11	raw_fqa_nocloud	Aqua	All	6356	2831	119	3	1.06	0.47	09/ 86/ 04	03/ 68/ 27	02/ 46/ 51	00/ 33/ 66	07/ 80/ 11	0.06	0.01 + 0.25*tau	****** + *******tau	-0.01 + 0.28*tau	****** + *******tau	0.29	0.08	0.03	-999	-999	-999
11	nocorr_fmatchedweak	Aqua	All	6504	3097	150	3	1.07	0.47	08/ 86/ 04	03/ 67/ 28	02/ 44/ 54	00/ 33/ 66	07/ 80/ 12	0.06	0.01 + 0.23*tau	****** + *******tau	-0.01 + 0.30*tau	****** + *******tau	0.28	0.08	0.03	-999	-999	-999
11	nocorr_fmatchedweak_nocloud	Aqua	All	6160	2720	114	3	1.05	0.47	09/ 86/ 03	03/ 69/ 26	01/ 47/ 50	00/ 33/ 66	07/ 80/ 11	0.06	0.01 + 0.23*tau	****** + *******tau	-0.00 + 0.27*tau	****** + *******tau	0.29	0.08	0.03	-999	-999	-999
11	nocorr_fmatchedstrong	Aqua	All	5336	1903	62	0	1.01	0.45	10/ 87/ 01	04/ 75/ 19	03/ 45/ 51	00/ 00/ 00	09/ 83/ 06	0.05	-0.00 + 0.28*tau	****** + *******tau	-0.00 + 0.24*tau	****** + *******tau	0.29	0.09	0.03	-999	-999	-999
11	nocorr_fmatchedstrong_noclo	Aqua	All	4997	1587	39	0	0.98	0.45	11/ 86/ 01	05/ 78/ 16	05/ 46/ 48	00/ 00/ 00	10/ 84/ 05	0.05	-0.02 + 0.34*tau	****** + *******tau	-0.00 + 0.24*tau	****** + *******tau	0.29	0.1	0.04	-999	-999	-999
11	nocorr_fclimweak	Aqua	All	6498	2964	139	3	1.05	0.45	09/ 86/ 04	03/ 70/ 26	02/ 45/ 51	00/ 33/ 66	07/ 80/ 11	0.06	0.01 + 0.23*tau	****** + *******tau	-0.01 + 0.31*tau	****** + *******tau	0.28	0.08	0.03	-999	-999	-999
11	nocorr_fclimweak_nocloud	Aqua	All	6151	2577	107	3	1.03	0.45	10/ 86/ 03	03/ 71/ 24	02/ 46/ 50	00/ 33/ 66	08/ 81/ 10	0.06	0.01 + 0.23*tau	****** + *******tau	-0.01 + 0.28*tau	****** + *******tau	0.28	0.08	0.03	-999	-999	-999
11	nocorr_fclimstrong	Aqua	All	4535	1540	42	0	0.98	0.44	12/ 86/ 01	05/ 77/ 16	02/ 40/ 57	00/ 00/ 00	10/ 83/ 05	0.05	-0.01 + 0.28*tau	****** + *******tau	0.00 + 0.24*tau	****** + *******tau	0.3	0.1	0.04	-999	-999	-999
11	nocorr_fclimstrong_nocloud	Aqua	All	4189	1248	29	0	0.96	0.44	13/ 85/ 01	06/ 81/ 12	03/ 48/ 48	00/ 00/ 00	11/ 84/ 03	0.05	-0.00 + 0.28*tau	****** + *******tau	0.00 + 0.22*tau	****** + *******tau	0.3	0.11	0.05	-999	-999	-999
11	albcorr_fmatchedweak	Aqua	All	6453	3152	156	3	1.07	0.48	06/ 89/ 03	03/ 71/ 25	01/ 43/ 54	00/ 33/ 66	05/ 82/ 11	0.06	0.01 + 0.23*tau	****** + *******tau	-0.01 + 0.30*tau	****** + *******tau	0.26	0.04	0.02	-999	-999	-999
11	albcorr_fmatchedweak_noclou	Aqua	All	6169	2720	115	3	1.04	0.48	07/ 89/ 03	03/ 73/ 22	01/ 47/ 50	00/ 33/ 66	05/ 84/ 09	0.06	0.00 + 0.24*tau	****** + *******tau	-0.01 + 0.27*tau	****** + *******tau	0.26	0.05	0.02	-999	-999	-999
11	albcorr_fmatchedstrong	Aqua	All	4977	2271	65	0	1.04	0.46	05/ 90/ 03	03/ 73/ 23	03/ 47/ 49	00/ 00/ 00	05/ 84/ 10	0.05	-0.03 + 0.34*tau	****** + *******tau	-0.00 + 0.25*tau	****** + *******tau	0.24	0.02	0.01	-999	-999	-999
11	albcorr_fmatchedstrong_nocl	Aqua	All	4719	1871	40	0	1.02	0.47	06/ 90/ 03	03/ 77/ 19	05/ 47/ 47	00/ 00/ 00	05/ 86/ 07	0.05	-0.01 + 0.29*tau	****** + *******tau	-0.00 + 0.24*tau	****** + *******tau	0.24	0.02	0.01	-999	-999	-999
11	albcorr_fclimweak	Aqua	All	6234	3246	142	3	1.07	0.47	06/ 88/ 05	02/ 69/ 27	02/ 44/ 53	00/ 33/ 66	04/ 81/ 13	0.06	0.01 + 0.22*tau	****** + *******tau	-0.01 + 0.29*tau	****** + *******tau	0.25	0.03	0.01	-999	-999	-999
11	albcorr_fclimweak_nocloud	Aqua	All	5959	2788	107	3	1.05	0.48	06/ 89/ 04	03/ 73/ 23	01/ 47/ 50	00/ 33/ 66	05/ 83/ 10	0.06	0.01 + 0.23*tau	****** + *******tau	-0.01 + 0.28*tau	****** + *******tau	0.24	0.03	0.02	-999	-999	-999
11	albcorr_fclimstrong	Aqua	All	4126	1947	54	0	1.05	0.47	05/ 90/ 04	03/ 72/ 23	00/ 44/ 55	00/ 00/ 00	04/ 84/ 10	0.05	-0.00 + 0.25*tau	****** + *******tau	-0.00 + 0.25*tau	****** + *******tau	0.23	0.01	0	-999	-999	-999
11	albcorr_fclimstrong_nocloud	Aqua	All	3845	1599	36	0	1.03	0.48	05/ 91/ 03	03/ 77/ 19	00/ 50/ 50	00/ 00/ 00	04/ 87/ 08	0.05	-0.01 + 0.27*tau	****** + *******tau	-0.00 + 0.24*tau	****** + *******tau	0.23	0.01	0	-999	-999	-999
11	corr1_fclimweak	Aqua	All	6234	3246	142	3	1.07	0.47	06/ 88/ 05	02/ 69/ 27	02/ 44/ 53	00/ 33/ 66	04/ 81/ 13	0.06	0.01 + 0.22*tau	****** + *******tau	-0.01 + 0.29*tau	****** + *******tau	0.25	0.03	0.01	-999	-999	-999
11	corr1_fclimweak_nocloud	Aqua	All	5959	2788	107	3	1.05	0.48	06/ 89/ 04	03/ 73/ 23	01/ 47/ 50	00/ 33/ 66	05/ 83/ 10	0.06	0.01 + 0.23*tau	****** + *******tau	-0.01 + 0.28*tau	****** + *******tau	0.24	0.03	0.02	-999	-999	-999
11	corr1_fclimstrong	Aqua	All	4126	1947	54	0	1.05	0.47	05/ 90/ 04	03/ 72/ 23	00/ 44/ 55	00/ 00/ 00	04/ 84/ 10	0.05	-0.00 + 0.25*tau	****** + *******tau	-0.00 + 0.25*tau	****** + *******tau	0.23	0.01	0	-999	-999	-999
11	corr1_fclimstrong_nocloud	Aqua	All	3845	1599	36	0	1.03	0.48	05/ 91/ 03	03/ 77/ 19	00/ 50/ 50	00/ 00/ 00	04/ 87/ 08	0.05	-0.01 + 0.27*tau	****** + *******tau	-0.00 + 0.24*tau	****** + *******tau	0.23	0.01	0	-999	-999	-999
11	corr2_fmatchedweak	Aqua	All	6453	3152	156	3	1.07	0.48	06/ 89/ 03	03/ 71/ 25	01/ 43/ 54	00/ 33/ 66	05/ 82/ 11	0.06	0.01 + 0.23*tau	****** + *******tau	-0.01 + 0.30*tau	****** + *******tau	0.26	0.04	0.02	-999	-999	-999
11	corr2_fmatchedweak_nocloud	Aqua	All	6169	2720	115	3	1.04	0.48	07/ 89/ 03	03/ 73/ 22	01/ 47/ 50	00/ 33/ 66	05/ 84/ 09	0.06	0.00 + 0.24*tau	****** + *******tau	-0.01 + 0.27*tau	****** + *******tau	0.26	0.05	0.02	-999	-999	-999
11	corr2_fmatchedstrong	Aqua	All	4977	2271	65	0	1.04	0.46	05/ 90/ 03	03/ 73/ 23	03/ 47/ 49	00/ 00/ 00	05/ 84/ 10	0.05	-0.03 + 0.34*tau	****** + *******tau	-0.00 + 0.25*tau	****** + *******tau	0.24	0.02	0.01	-999	-999	-999
11	corr2_fmatchedstrong_noclou	Aqua	All	4719	1871	40	0	1.02	0.47	06/ 90/ 03	03/ 77/ 19	05/ 47/ 47	00/ 00/ 00	05/ 86/ 07	0.05	-0.01 + 0.29*tau	****** + *******tau	-0.00 + 0.24*tau	****** + *******tau	0.24	0.02	0.01	-999	-999	-999
12	raw_nobuddy	Terra	All	4294	2197	154	5	1.09	0.48	08/ 85/ 05	03/ 65/ 31	00/ 49/ 50	00/ 40/ 60	06/ 78/ 15	0.08	0.01 + 0.24*tau	****** + *******tau	0.01 + 0.27*tau	****** + *******tau	0.25	0.05	0.02	-999	-999	-999
12	raw_nosdcheck	Terra	All	4235	2121	147	5	1.08	0.49	08/ 86/ 04	03/ 66/ 29	00/ 51/ 48	00/ 40/ 60	07/ 78/ 14	0.07	0.01 + 0.22*tau	****** + *******tau	0.00 + 0.26*tau	****** + *******tau	0.25	0.05	0.02	-999	-999	-999
12	raw	Terra	All	3986	1989	137	5	1.07	0.5	08/ 87/ 04	03/ 68/ 27	00/ 53/ 45	00/ 40/ 60	06/ 80/ 12	0.07	0.02 + 0.18*tau	****** + *******tau	0.00 + 0.26*tau	****** + *******tau	0.26	0.04	0.01	-999	-999	-999
12	raw_fqa	Terra	All	3107	1253	80	3	1	0.58	13/ 85/ 01	05/ 81/ 13	01/ 60/ 38	00/ 00/100	10/ 83/ 05	0.05	0.02 + 0.17*tau	****** + *******tau	0.01 + 0.18*tau	****** + *******tau	0.25	0.05	0.01	-999	-999	-999
12	raw_fqa_nocloud	Terra	All	2913	1075	63	3	0.98	0.63	14/ 84/ 00	05/ 84/ 10	00/ 66/ 33	00/ 00/100	11/ 84/ 03	0.05	0.02 + 0.17*tau	****** + *******tau	0.02 + 0.14*tau	****** + *******tau	0.25	0.06	0.01	-999	-999	-999
12	nocorr_fmatchedweak	Terra	All	2820	1127	72	3	1	0.56	13/ 85/ 01	05/ 81/ 13	01/ 58/ 40	00/ 00/100	11/ 83/ 05	0.05	0.02 + 0.19*tau	****** + *******tau	0.01 + 0.19*tau	****** + *******tau	0.25	0.05	0.01	-999	-999	-999
12	nocorr_fmatchedweak_nocloud	Terra	All	2639	961	57	3	0.98	0.6	15/ 83/ 00	06/ 84/ 09	00/ 61/ 38	00/ 00/100	12/ 83/ 03	0.05	0.02 + 0.18*tau	****** + *******tau	0.01 + 0.18*tau	****** + *******tau	0.25	0.06	0.01	-999	-999	-999
12	nocorr_fmatchedstrong	Terra	All	2598	942	56	2	0.97	0.59	16/ 82/ 00	06/ 84/ 09	00/ 64/ 35	00/ 00/100	13/ 82/ 03	0.05	0.01 + 0.20*tau	****** + *******tau	0.02 + 0.16*tau	****** + *******tau	0.25	0.06	0.02	-999	-999	-999
12	nocorr_fmatchedstrong_noclo	Terra	All	2407	791	42	2	0.95	0.65	18/ 81/ 00	07/ 85/ 06	00/ 71/ 28	00/ 00/100	15/ 82/ 02	0.05	0.02 + 0.18*tau	****** + *******tau	0.02 + 0.14*tau	****** + *******tau	0.25	0.07	0.02	-999	-999	-999
12	nocorr_fclimweak	Terra	All	2897	1152	74	4	1	0.58	14/ 84/ 01	05/ 82/ 11	00/ 62/ 37	00/ 25/ 75	11/ 83/ 04	0.06	0.02 + 0.18*tau	****** + *******tau	0.01 + 0.17*tau	****** + *******tau	0.25	0.06	0.01	-999	-999	-999
12	nocorr_fclimweak_nocloud	Terra	All	2701	964	59	4	0.98	0.64	15/ 83/ 00	05/ 85/ 09	00/ 71/ 28	00/ 25/ 75	12/ 83/ 03	0.05	0.02 + 0.16*tau	****** + *******tau	0.02 + 0.13*tau	****** + *******tau	0.25	0.06	0.02	-999	-999	-999
12	nocorr_fclimstrong	Terra	All	2271	775	42	2	0.95	0.62	20/ 78/ 00	07/ 83/ 09	02/ 76/ 21	00/ 00/100	17/ 79/ 03	0.06	0.03 + 0.15*tau	****** + *******tau	0.02 + 0.15*tau	****** + *******tau	0.25	0.07	0.02	-999	-999	-999
12	nocorr_fclimstrong_nocloud	Terra	All	2087	635	33	2	0.93	0.69	22/ 77/ 00	08/ 85/ 06	03/ 81/ 15	00/ 00/100	18/ 78/ 02	0.06	0.03 + 0.15*tau	****** + *******tau	0.02 + 0.14*tau	****** + *******tau	0.25	0.08	0.03	-999	-999	-999
12	albcorr_fmatchedweak	Terra	All	2681	1277	72	3	1.02	0.56	06/ 90/ 02	04/ 80/ 15	01/ 58/ 40	00/ 00/100	06/ 86/ 07	0.05	0.01 + 0.19*tau	****** + *******tau	0.01 + 0.20*tau	****** + *******tau	0.21	0.01	0	-999	-999	-999
12	albcorr_fmatchedweak_noclou	Terra	All	2525	1080	58	3	1.01	0.62	07/ 90/ 01	04/ 83/ 11	00/ 62/ 37	00/ 00/100	06/ 88/ 05	0.05	0.01 + 0.20*tau	****** + *******tau	0.01 + 0.17*tau	****** + *******tau	0.2	0.01	0.01	-999	-999	-999
12	albcorr_fmatchedstrong	Terra	All	2406	1139	56	2	1.01	0.6	06/ 91/ 02	04/ 81/ 13	00/ 64/ 35	00/ 00/100	05/ 87/ 06	0.05	0.01 + 0.19*tau	****** + *******tau	0.01 + 0.18*tau	****** + *******tau	0.19	0.01	0	-999	-999	-999
12	albcorr_fmatchedstrong_nocl	Terra	All	2257	943	44	2	0.99	0.66	06/ 91/ 01	05/ 84/ 10	00/ 70/ 29	00/ 00/100	06/ 88/ 04	0.04	0.00 + 0.20*tau	****** + *******tau	0.01 + 0.15*tau	****** + *******tau	0.19	0.01	0	-999	-999	-999
12	albcorr_fclimweak	Terra	All	2687	1362	80	5	1.05	0.59	05/ 91/ 02	04/ 79/ 16	00/ 60/ 40	00/ 40/ 60	04/ 87/ 08	0.05	0.01 + 0.18*tau	****** + *******tau	0.01 + 0.20*tau	****** + *******tau	0.2	0	0	-999	-999	-999
12	albcorr_fclimweak_nocloud	Terra	All	2530	1132	64	5	1.02	0.65	05/ 92/ 01	04/ 83/ 12	00/ 67/ 32	00/ 40/ 60	05/ 88/ 05	0.05	0.01 + 0.18*tau	****** + *******tau	0.01 + 0.16*tau	****** + *******tau	0.19	0	0	-999	-999	-999
12	albcorr_fclimstrong	Terra	All	2075	965	49	4	1.02	0.59	06/ 91/ 02	04/ 80/ 15	00/ 63/ 36	25/ 25/ 50	05/ 87/ 06	0.05	0.01 + 0.18*tau	****** + *******tau	0.01 + 0.18*tau	****** + *******tau	0.18	0	0	-999	-999	-999
12	albcorr_fclimstrong_nocloud	Terra	All	1935	778	40	4	1.01	0.66	07/ 91/ 01	05/ 83/ 11	00/ 70/ 30	25/ 25/ 50	06/ 88/ 04	0.04	0.01 + 0.17*tau	****** + *******tau	0.01 + 0.16*tau	****** + *******tau	0.18	0	0	-999	-999	-999
12	corr1_fclimweak	Terra	All	2687	1362	80	5	1.05	0.59	05/ 91/ 02	04/ 79/ 16	00/ 60/ 40	00/ 40/ 60	04/ 87/ 08	0.05	0.01 + 0.18*tau	****** + *******tau	0.01 + 0.20*tau	****** + *******tau	0.2	0	0	-999	-999	-999
12	corr1_fclimweak_nocloud	Terra	All	2530	1132	64	5	1.02	0.65	05/ 92/ 01	04/ 83/ 12	00/ 67/ 32	00/ 40/ 60	05/ 88/ 05	0.05	0.01 + 0.18*tau	****** + *******tau	0.01 + 0.16*tau	****** + *******tau	0.19	0	0	-999	-999	-999
12	corr1_fclimstrong	Terra	All	2075	965	49	4	1.02	0.59	06/ 91/ 02	04/ 80/ 15	00/ 63/ 36	25/ 25/ 50	05/ 87/ 06	0.05	0.01 + 0.18*tau	****** + *******tau	0.01 + 0.18*tau	****** + *******tau	0.18	0	0	-999	-999	-999
12	corr1_fclimstrong_nocloud	Terra	All	1935	778	40	4	1.01	0.66	07/ 91/ 01	05/ 83/ 11	00/ 70/ 30	25/ 25/ 50	06/ 88/ 04	0.04	0.01 + 0.17*tau	****** + *******tau	0.01 + 0.16*tau	****** + *******tau	0.18	0	0	-999	-999	-999
12	corr2_fmatchedweak	Terra	All	2681	1277	72	3	1.02	0.56	06/ 90/ 02	04/ 80/ 15	01/ 58/ 40	00/ 00/100	06/ 86/ 07	0.05	0.01 + 0.19*tau	****** + *******tau	0.01 + 0.20*tau	****** + *******tau	0.21	0.01	0	-999	-999	-999
12	corr2_fmatchedweak_nocloud	Terra	All	2525	1080	58	3	1.01	0.62	07/ 90/ 01	04/ 83/ 11	00/ 62/ 37	00/ 00/100	06/ 88/ 05	0.05	0.01 + 0.20*tau	****** + *******tau	0.01 + 0.17*tau	****** + *******tau	0.2	0.01	0.01	-999	-999	-999
12	corr2_fmatchedstrong	Terra	All	2406	1139	56	2	1.01	0.6	06/ 91/ 02	04/ 81/ 13	00/ 64/ 35	00/ 00/100	05/ 87/ 06	0.05	0.01 + 0.19*tau	****** + *******tau	0.01 + 0.18*tau	****** + *******tau	0.19	0.01	0	-999	-999	-999
12	corr2_fmatchedstrong_noclou	Terra	All	2257	943	44	2	0.99	0.66	06/ 91/ 01	05/ 84/ 10	00/ 70/ 29	00/ 00/100	06/ 88/ 04	0.04	0.00 + 0.20*tau	****** + *******tau	0.01 + 0.15*tau	****** + *******tau	0.19	0.01	0	-999	-999	-999
12	raw_nobuddy	Aqua	All	3476	2163	161	6	1.13	0.48	07/ 85/ 07	02/ 59/ 38	01/ 40/ 57	00/ 16/ 83	05/ 74/ 20	0.08	0.01 + 0.24*tau	****** + *******tau	0.00 + 0.29*tau	****** + *******tau	0.27	0.05	0.03	-999	-999	-999
12	raw_nosdcheck	Aqua	All	3447	2055	157	6	1.12	0.49	07/ 85/ 06	02/ 61/ 36	01/ 42/ 56	00/ 16/ 83	05/ 75/ 18	0.08	0.01 + 0.23*tau	****** + *******tau	0.00 + 0.29*tau	****** + *******tau	0.27	0.05	0.02	-999	-999	-999
12	raw	Aqua	All	3266	1904	139	6	1.11	0.53	07/ 86/ 05	02/ 63/ 34	01/ 46/ 51	00/ 16/ 83	05/ 77/ 17	0.07	0.01 + 0.23*tau	****** + *******tau	0.01 + 0.26*tau	****** + *******tau	0.27	0.04	0.01	-999	-999	-999
12	raw_fqa	Aqua	All	2485	1076	77	3	1.01	0.63	10/ 87/ 01	04/ 79/ 15	01/ 62/ 36	00/ 00/100	08/ 84/ 06	0.05	0.01 + 0.20*tau	****** + *******tau	0.02 + 0.16*tau	****** + *******tau	0.25	0.06	0.02	-999	-999	-999
12	raw_fqa_nocloud	Aqua	All	2316	881	61	3	0.99	0.66	12/ 86/ 00	04/ 82/ 12	00/ 63/ 36	00/ 00/100	10/ 85/ 04	0.05	0.01 + 0.20*tau	****** + *******tau	0.02 + 0.15*tau	****** + *******tau	0.25	0.06	0.02	-999	-999	-999
12	nocorr_fmatchedweak	Aqua	All	2285	994	60	3	1	0.61	11/ 87/ 01	04/ 78/ 16	01/ 60/ 38	00/ 00/100	09/ 84/ 06	0.05	-0.00 + 0.24*tau	****** + *******tau	0.01 + 0.18*tau	****** + *******tau	0.26	0.06	0.02	-999	-999	-999
12	nocorr_fmatchedweak_nocloud	Aqua	All	2129	816	47	3	0.99	0.64	12/ 86/ 01	05/ 81/ 12	00/ 61/ 38	00/ 00/100	10/ 84/ 04	0.05	-0.00 + 0.23*tau	****** + *******tau	0.01 + 0.17*tau	****** + *******tau	0.25	0.06	0.02	-999	-999	-999
12	nocorr_fmatchedstrong	Aqua	All	2106	818	43	3	0.97	0.64	13/ 85/ 01	05/ 83/ 11	02/ 65/ 32	00/ 00/100	11/ 84/ 04	0.05	0.01 + 0.21*tau	****** + *******tau	0.01 + 0.18*tau	****** + *******tau	0.26	0.07	0.02	-999	-999	-999
12	nocorr_fmatchedstrong_noclo	Aqua	All	1946	663	35	3	0.94	0.68	15/ 83/ 00	06/ 86/ 07	00/ 74/ 25	00/ 00/100	13/ 84/ 02	0.05	0.01 + 0.21*tau	****** + *******tau	0.02 + 0.14*tau	****** + *******tau	0.25	0.08	0.03	-999	-999	-999
12	nocorr_fclimweak	Aqua	All	2355	980	66	3	1	0.65	11/ 86/ 01	04/ 81/ 14	01/ 69/ 28	00/ 00/100	09/ 84/ 05	0.05	-0.00 + 0.24*tau	****** + *******tau	0.02 + 0.16*tau	****** + *******tau	0.26	0.06	0.02	-999	-999	-999
12	nocorr_fclimweak_nocloud	Aqua	All	2173	807	50	3	0.97	0.69	13/ 85/ 00	05/ 84/ 10	00/ 76/ 24	00/ 00/100	11/ 84/ 03	0.05	-0.00 + 0.24*tau	****** + *******tau	0.02 + 0.13*tau	****** + *******tau	0.25	0.07	0.02	-999	-999	-999
12	nocorr_fclimstrong	Aqua	All	1859	645	45	3	0.96	0.68	16/ 82/ 00	06/ 84/ 09	02/ 68/ 28	00/ 00/100	13/ 82/ 03	0.05	-0.00 + 0.25*tau	****** + *******tau	0.02 + 0.16*tau	****** + *******tau	0.26	0.09	0.03	-999	-999	-999
12	nocorr_fclimstrong_nocloud	Aqua	All	1692	528	34	3	0.93	0.71	18/ 80/ 00	07/ 86/ 05	00/ 79/ 20	00/ 00/100	16/ 81/ 02	0.05	0.01 + 0.21*tau	****** + *******tau	0.02 + 0.14*tau	****** + *******tau	0.25	0.1	0.04	-999	-999	-999
12	albcorr_fmatchedweak	Aqua	All	2134	1144	61	3	1.04	0.65	05/ 91/ 03	02/ 78/ 19	01/ 59/ 39	00/ 00/100	04/ 86/ 09	0.05	-0.00 + 0.23*tau	****** + *******tau	0.01 + 0.18*tau	****** + *******tau	0.21	0.01	0	-999	-999	-999
12	albcorr_fmatchedweak_noclou	Aqua	All	1998	949	49	3	1.02	0.66	05/ 92/ 01	03/ 81/ 15	00/ 61/ 38	00/ 00/100	04/ 88/ 06	0.04	0.00 + 0.21*tau	****** + *******tau	0.01 + 0.19*tau	****** + *******tau	0.2	0.01	0.01	-999	-999	-999
12	albcorr_fmatchedstrong	Aqua	All	1920	1005	44	3	1.02	0.66	05/ 92/ 02	02/ 79/ 17	02/ 61/ 36	00/ 00/100	04/ 87/ 08	0.05	-0.01 + 0.23*tau	****** + *******tau	0.02 + 0.15*tau	****** + *******tau	0.2	0	0	-999	-999	-999
12	albcorr_fmatchedstrong_nocl	Aqua	All	1793	820	36	3	0.99	0.69	05/ 92/ 02	03/ 83/ 13	00/ 69/ 30	00/ 00/100	04/ 89/ 05	0.04	-0.01 + 0.24*tau	****** + *******tau	0.02 + 0.14*tau	****** + *******tau	0.19	0	0	-999	-999	-999
12	albcorr_fclimweak	Aqua	All	2159	1169	75	3	1.05	0.68	04/ 91/ 03	02/ 78/ 18	00/ 66/ 33	00/ 00/100	03/ 86/ 09	0.05	0.00 + 0.21*tau	****** + *******tau	0.01 + 0.18*tau	****** + *******tau	0.2	0	0	-999	-999	-999
12	albcorr_fclimweak_nocloud	Aqua	All	2014	965	54	3	1.03	0.71	05/ 92/ 02	03/ 82/ 13	00/ 72/ 27	00/ 00/100	04/ 88/ 06	0.04	-0.00 + 0.21*tau	****** + *******tau	0.01 + 0.17*tau	****** + *******tau	0.2	0	0	-999	-999	-999
12	albcorr_fclimstrong	Aqua	All	1684	817	52	3	1.03	0.69	05/ 92/ 02	03/ 80/ 16	00/ 63/ 36	00/ 00/100	04/ 87/ 07	0.05	-0.01 + 0.23*tau	****** + *******tau	0.01 + 0.18*tau	****** + *******tau	0.19	0	0	-999	-999	-999
12	albcorr_fclimstrong_nocloud	Aqua	All	1556	667	39	3	1	0.72	06/ 92/ 01	04/ 84/ 11	00/ 74/ 25	00/ 00/100	05/ 89/ 04	0.04	-0.02 + 0.26*tau	****** + *******tau	0.01 + 0.16*tau	****** + *******tau	0.18	0	0	-999	-999	-999
12	corr1_fclimweak	Aqua	All	2159	1169	75	3	1.05	0.68	04/ 91/ 03	02/ 78/ 18	00/ 66/ 33	00/ 00/100	03/ 86/ 09	0.05	0.00 + 0.21*tau	****** + *******tau	0.01 + 0.18*tau	****** + *******tau	0.2	0	0	-999	-999	-999
12	corr1_fclimweak_nocloud	Aqua	All	2014	965	54	3	1.03	0.71	05/ 92/ 02	03/ 82/ 13	00/ 72/ 27	00/ 00/100	04/ 88/ 06	0.04	-0.00 + 0.21*tau	****** + *******tau	0.01 + 0.17*tau	****** + *******tau	0.2	0	0	-999	-999	-999
12	corr1_fclimstrong	Aqua	All	1684	817	52	3	1.03	0.69	05/ 92/ 02	03/ 80/ 16	00/ 63/ 36	00/ 00/100	04/ 87/ 07	0.05	-0.01 + 0.23*tau	****** + *******tau	0.01 + 0.18*tau	****** + *******tau	0.19	0	0	-999	-999	-999
12	corr1_fclimstrong_nocloud	Aqua	All	1556	667	39	3	1	0.72	06/ 92/ 01	04/ 84/ 11	00/ 74/ 25	00/ 00/100	05/ 89/ 04	0.04	-0.02 + 0.26*tau	****** + *******tau	0.01 + 0.16*tau	****** + *******tau	0.18	0	0	-999	-999	-999
12	corr2_fmatchedweak	Aqua	All	2134	1144	61	3	1.04	0.65	05/ 91/ 03	02/ 78/ 19	01/ 59/ 39	00/ 00/100	04/ 86/ 09	0.05	-0.00 + 0.23*tau	****** + *******tau	0.01 + 0.18*tau	****** + *******tau	0.21	0.01	0	-999	-999	-999
12	corr2_fmatchedweak_nocloud	Aqua	All	1998	949	49	3	1.02	0.66	05/ 92/ 01	03/ 81/ 15	00/ 61/ 38	00/ 00/100	04/ 88/ 06	0.04	0.00 + 0.21*tau	****** + *******tau	0.01 + 0.19*tau	****** + *******tau	0.2	0.01	0.01	-999	-999	-999
12	corr2_fmatchedstrong	Aqua	All	1920	1005	44	3	1.02	0.66	05/ 92/ 02	02/ 79/ 17	02/ 61/ 36	00/ 00/100	04/ 87/ 08	0.05	-0.01 + 0.23*tau	****** + *******tau	0.02 + 0.15*tau	****** + *******tau	0.2	0	0	-999	-999	-999
12	corr2_fmatchedstrong_noclou	Aqua	All	1793	820	36	3	0.99	0.69	05/ 92/ 02	03/ 83/ 13	00/ 69/ 30	00/ 00/100	04/ 89/ 05	0.04	-0.01 + 0.24*tau	****** + *******tau	0.02 + 0.14*tau	****** + *******tau	0.19	0	0	-999	-999	-999
13	raw_nobuddy	Terra	All	1589	2377	1148	265	0.97	0.51	16/ 69/ 14	11/ 57/ 31	07/ 52/ 40	09/ 44/ 45	11/ 59/ 28	0.16	0.05 + 0.22*tau	-0.30 + 0.42*tau	0.04 + 0.24*tau	-0.06 + 0.30*tau	0.25	0.04	0.01	0.668	0.493	0.516
13	raw_nosdcheck	Terra	All	1582	2328	1126	264	0.97	0.51	16/ 68/ 14	11/ 57/ 31	07/ 53/ 39	09/ 45/ 45	11/ 59/ 28	0.16	0.05 + 0.22*tau	-0.32 + 0.43*tau	0.04 + 0.23*tau	-0.04 + 0.29*tau	0.25	0.04	0.01	0.667	0.486	0.513
13	raw	Terra	All	1499	2177	1069	252	0.97	0.51	17/ 69/ 13	11/ 58/ 30	07/ 53/ 38	09/ 45/ 44	12/ 60/ 27	0.16	0.05 + 0.22*tau	-0.33 + 0.42*tau	0.04 + 0.24*tau	0.06 + 0.23*tau	0.26	0.04	0.01	0.636	0.487	0.492
13	raw_fqa	Terra	All	1063	1175	683	147	0.95	0.49	22/ 69/ 08	12/ 64/ 23	07/ 53/ 38	14/ 44/ 41	14/ 62/ 22	0.13	0.05 + 0.21*tau	-0.39 + 0.47*tau	0.02 + 0.25*tau	-0.19 + 0.37*tau	0.21	0.04	0.01	0.611	0.472	0.5
13	raw_fqa_nocloud	Terra	All	982	1084	642	134	0.93	0.5	23/ 68/ 07	11/ 65/ 22	08/ 54/ 37	13/ 44/ 42	15/ 63/ 21	0.13	0.05 + 0.21*tau	-0.45 + 0.50*tau	0.02 + 0.25*tau	0.22 + 0.14*tau	0.21	0.04	0.01	0.617	0.481	0.493
13	nocorr_fmatchedweak	Terra	All	1057	1116	594	133	0.92	0.49	23/ 68/ 07	13/ 63/ 23	08/ 54/ 37	14/ 47/ 38	16/ 62/ 21	0.1	0.05 + 0.22*tau	-0.38 + 0.46*tau	0.03 + 0.24*tau	-0.29 + 0.43*tau	0.21	0.04	0.01	0.6	0.463	0.495
13	nocorr_fmatchedweak_nocloud	Terra	All	983	1031	548	122	0.91	0.5	24/ 67/ 07	13/ 64/ 22	09/ 54/ 35	13/ 45/ 40	16/ 62/ 20	0.1	0.05 + 0.21*tau	-0.38 + 0.46*tau	0.03 + 0.24*tau	-0.19 + 0.37*tau	0.21	0.04	0.01	0.621	0.464	0.492
13	nocorr_fmatchedstrong	Terra	All	847	595	261	53	0.8	0.5	34/ 60/ 04	23/ 65/ 11	13/ 67/ 18	26/ 45/ 28	27/ 62/ 09	0.07	0.04 + 0.23*tau	-0.52 + 0.56*tau	0.06 + 0.19*tau	-0.18 + 0.34*tau	0.25	0.06	0.02	0.592	0.412	0.47
13	nocorr_fmatchedstrong_noclo	Terra	All	786	528	237	47	0.78	0.51	35/ 59/ 04	23/ 67/ 09	14/ 67/ 17	25/ 44/ 29	28/ 62/ 08	0.07	0.05 + 0.22*tau	-0.44 + 0.52*tau	0.05 + 0.21*tau	-0.00 + 0.24*tau	0.25	0.07	0.02	0.589	0.45	0.461
13	nocorr_fclimweak	Terra	All	1038	1012	508	127	0.93	0.5	24/ 67/ 07	12/ 65/ 22	07/ 59/ 33	15/ 46/ 37	16/ 63/ 19	0.11	0.05 + 0.21*tau	-0.47 + 0.49*tau	0.03 + 0.23*tau	-0.17 + 0.35*tau	0.21	0.04	0.01	0.594	0.45	0.471
13	nocorr_fclimweak_nocloud	Terra	All	938	942	466	109	0.93	0.52	24/ 67/ 08	13/ 66/ 20	07/ 59/ 33	14/ 45/ 39	16/ 64/ 18	0.1	0.05 + 0.20*tau	-0.45 + 0.48*tau	0.03 + 0.21*tau	-0.22 + 0.37*tau	0.21	0.04	0.01	0.607	0.427	0.473
13	nocorr_fclimstrong	Terra	All	686	344	125	25	0.79	0.48	39/ 55/ 04	22/ 68/ 09	16/ 64/ 20	28/ 52/ 20	32/ 60/ 07	0.07	0.04 + 0.28*tau	-0.99 + 0.78*tau	0.07 + 0.17*tau	****** + *******tau	0.26	0.08	0.03	0.617	0.366	0.366
13	nocorr_fclimstrong_nocloud	Terra	All	626	302	111	23	0.75	0.48	41/ 54/ 04	24/ 67/ 07	17/ 65/ 17	26/ 52/ 21	33/ 59/ 06	0.07	0.03 + 0.30*tau	-0.69 + 0.63*tau	0.07 + 0.18*tau	****** + *******tau	0.26	0.09	0.03	0.602	0.399	0.399
13	albcorr_fmatchedweak	Terra	All	1056	1133	590	133	0.92	0.49	13/ 79/ 06	13/ 67/ 19	08/ 54/ 37	14/ 47/ 38	12/ 68/ 19	0.09	0.04 + 0.23*tau	-0.45 + 0.49*tau	0.02 + 0.25*tau	0.19 + 0.15*tau	0.2	0.01	0	0.6	0.47	0.477
13	albcorr_fmatchedweak_noclou	Terra	All	982	1051	548	122	0.91	0.49	14/ 79/ 05	14/ 68/ 17	09/ 54/ 35	13/ 45/ 40	13/ 68/ 18	0.09	0.04 + 0.23*tau	-0.43 + 0.49*tau	0.02 + 0.24*tau	-0.10 + 0.32*tau	0.2	0.01	0	0.621	0.467	0.484
13	albcorr_fmatchedstrong	Terra	All	763	688	262	53	0.8	0.52	19/ 73/ 07	18/ 69/ 11	13/ 67/ 18	26/ 45/ 28	18/ 70/ 11	0.07	0.02 + 0.25*tau	-0.53 + 0.56*tau	0.05 + 0.20*tau	-0.18 + 0.34*tau	0.21	0.01	0	0.592	0.427	0.471
13	albcorr_fmatchedstrong_nocl	Terra	All	706	613	238	47	0.79	0.53	19/ 73/ 07	19/ 69/ 10	14/ 67/ 17	25/ 44/ 29	18/ 70/ 10	0.07	0.02 + 0.24*tau	-0.54 + 0.57*tau	0.04 + 0.22*tau	0.16 + 0.16*tau	0.21	0.01	0	0.589	0.452	0.467
13	albcorr_fclimweak	Terra	All	987	1075	518	122	0.93	0.52	13/ 78/ 07	11/ 69/ 18	07/ 60/ 32	17/ 47/ 35	11/ 70/ 18	0.1	0.03 + 0.22*tau	-0.48 + 0.49*tau	0.02 + 0.23*tau	0.13 + 0.18*tau	0.19	0.01	0	0.6	0.443	0.458
13	albcorr_fclimweak_nocloud	Terra	All	910	991	470	105	0.93	0.54	13/ 79/ 07	12/ 70/ 17	08/ 60/ 31	17/ 45/ 37	12/ 70/ 17	0.1	0.04 + 0.21*tau	-0.38 + 0.44*tau	0.02 + 0.22*tau	-0.30 + 0.42*tau	0.19	0.01	0	0.609	0.43	0.483
13	albcorr_fclimstrong	Terra	All	611	412	138	25	0.82	0.51	22/ 68/ 08	20/ 67/ 11	14/ 62/ 23	28/ 48/ 24	20/ 67/ 11	0.07	0.02 + 0.27*tau	****** + *******tau	0.07 + 0.16*tau	****** + *******tau	0.21	0.01	0	0.609	0.351	0.351
13	albcorr_fclimstrong_nocloud	Terra	All	564	358	120	23	0.79	0.51	23/ 68/ 08	21/ 67/ 10	15/ 66/ 18	26/ 47/ 26	21/ 67/ 10	0.07	0.01 + 0.29*tau	-0.66 + 0.64*tau	0.06 + 0.18*tau	****** + *******tau	0.2	0.01	0	0.597	0.39	0.39
13	corr1_fclimweak	Terra	All	1009	1101	507	95	0.89	0.55	13/ 78/ 07	13/ 69/ 16	10/ 61/ 27	22/ 50/ 27	13/ 70/ 15	0.09	0.03 + 0.21*tau	-0.53 + 0.53*tau	0.03 + 0.21*tau	0.36 + 0.07*tau	0.19	0.01	0	0.648	0.425	0.49
13	corr1_fclimweak_nocloud	Terra	All	933	1008	465	80	0.89	0.57	13/ 79/ 06	14/ 71/ 14	10/ 62/ 26	21/ 48/ 30	13/ 71/ 14	0.09	0.03 + 0.21*tau	-0.45 + 0.49*tau	0.04 + 0.19*tau	-0.20 + 0.39*tau	0.19	0.01	0	0.67	0.396	0.533
13	corr1_fclimstrong	Terra	All	625	409	129	25	0.78	0.5	22/ 68/ 08	21/ 68/ 10	16/ 66/ 17	28/ 64/ 08	21/ 68/ 10	0.07	0.01 + 0.30*tau	****** + *******tau	0.08 + 0.13*tau	****** + *******tau	0.2	0.01	0	0.641	0.306	0.306
13	corr1_fclimstrong_nocloud	Terra	All	577	355	113	23	0.75	0.5	23/ 67/ 08	24/ 66/ 09	17/ 67/ 15	26/ 60/ 13	23/ 67/ 09	0.07	0.01 + 0.31*tau	****** + *******tau	0.06 + 0.19*tau	****** + *******tau	0.2	0.01	0	0.625	0.392	0.392
13	corr2_fmatchedweak	Terra	All	1082	1155	577	107	0.88	0.51	14/ 79/ 06	16/ 67/ 16	11/ 56/ 32	17/ 52/ 29	14/ 69/ 16	0.09	0.04 + 0.22*tau	-0.47 + 0.52*tau	0.04 + 0.22*tau	-0.47 + 0.54*tau	0.2	0.01	0	0.63	0.437	0.524
13	corr2_fmatchedweak_nocloud	Terra	All	1013	1070	535	94	0.87	0.52	14/ 79/ 05	16/ 68/ 14	11/ 57/ 31	18/ 48/ 32	15/ 69/ 15	0.09	0.03 + 0.22*tau	-0.51 + 0.54*tau	0.04 + 0.22*tau	0.41 + 0.04*tau	0.2	0.01	0	0.657	0.446	0.496
13	corr2_fmatchedstrong	Terra	All	783	690	251	48	0.77	0.52	19/ 72/ 07	24/ 64/ 11	12/ 73/ 14	29/ 47/ 22	20/ 69/ 10	0.06	0.02 + 0.26*tau	-0.46 + 0.54*tau	0.06 + 0.20*tau	-0.20 + 0.37*tau	0.2	0.01	0	0.633	0.418	0.488
13	corr2_fmatchedstrong_noclou	Terra	All	727	613	230	42	0.76	0.53	19/ 72/ 07	24/ 66/ 08	13/ 73/ 12	28/ 50/ 21	20/ 69/ 09	0.07	0.02 + 0.25*tau	-0.42 + 0.52*tau	0.06 + 0.21*tau	-0.15 + 0.36*tau	0.2	0.01	0	0.636	0.438	0.508
13	raw_nobuddy	Aqua	All	1183	2288	1262	245	1.01	0.51	12/ 73/ 13	10/ 53/ 36	06/ 45/ 48	07/ 41/ 51	09/ 55/ 34	0.17	0.05 + 0.24*tau	-0.16 + 0.32*tau	0.04 + 0.25*tau	-0.05 + 0.30*tau	0.25	0.02	0.01	0.645	0.516	0.522
13	raw_nosdcheck	Aqua	All	1178	2241	1242	243	1.01	0.51	13/ 73/ 12	10/ 53/ 35	06/ 45/ 47	07/ 41/ 51	10/ 55/ 34	0.17	0.05 + 0.24*tau	-0.10 + 0.29*tau	0.04 + 0.25*tau	-0.06 + 0.30*tau	0.25	0.02	0.01	0.648	0.512	0.524
13	raw	Aqua	All	1109	2092	1149	230	1.01	0.52	12/ 75/ 12	11/ 53/ 34	06/ 46/ 47	07/ 43/ 49	10/ 56/ 33	0.17	0.05 + 0.23*tau	-0.23 + 0.34*tau	0.04 + 0.25*tau	0.09 + 0.22*tau	0.26	0.02	0	0.624	0.504	0.506
13	raw_fqa	Aqua	All	759	1033	640	123	1	0.5	22/ 69/ 07	12/ 62/ 25	06/ 47/ 46	08/ 51/ 40	13/ 60/ 25	0.16	0.05 + 0.23*tau	-0.53 + 0.50*tau	0.02 + 0.26*tau	0.05 + 0.21*tau	0.2	0.02	0	0.611	0.493	0.493
13	raw_fqa_nocloud	Aqua	All	697	968	604	107	1	0.51	24/ 68/ 06	12/ 62/ 25	06/ 48/ 44	08/ 49/ 42	14/ 59/ 25	0.17	0.05 + 0.23*tau	-0.47 + 0.46*tau	0.03 + 0.25*tau	0.25 + 0.12*tau	0.2	0.02	0	0.627	0.48	0.489
13	nocorr_fmatchedweak	Aqua	All	736	975	532	109	0.98	0.54	23/ 69/ 07	13/ 62/ 24	07/ 50/ 41	07/ 52/ 40	15/ 61/ 23	0.12	0.04 + 0.24*tau	-0.57 + 0.52*tau	0.04 + 0.22*tau	0.04 + 0.22*tau	0.21	0.02	0	0.616	0.435	0.449
13	nocorr_fmatchedweak_nocloud	Aqua	All	683	915	498	95	0.98	0.54	25/ 67/ 06	13/ 62/ 24	08/ 50/ 41	08/ 50/ 41	15/ 60/ 23	0.12	0.04 + 0.24*tau	-0.38 + 0.39*tau	0.04 + 0.21*tau	-0.38 + 0.47*tau	0.21	0.02	0	0.625	0.429	0.487
13	nocorr_fmatchedstrong	Aqua	All	611	585	233	37	0.88	0.55	29/ 67/ 03	18/ 71/ 10	12/ 64/ 23	10/ 70/ 18	21/ 68/ 09	0.08	0.02 + 0.25*tau	-0.37 + 0.42*tau	0.05 + 0.17*tau	-1.00 + 0.78*tau	0.24	0.04	0.01	0.579	0.352	0.444
13	nocorr_fmatchedstrong_noclo	Aqua	All	558	523	214	31	0.87	0.56	32/ 65/ 02	18/ 72/ 08	13/ 66/ 20	12/ 70/ 16	23/ 68/ 08	0.07	0.02 + 0.25*tau	-0.36 + 0.42*tau	0.05 + 0.17*tau	-0.82 + 0.68*tau	0.26	0.04	0.01	0.605	0.358	0.468
13	nocorr_fclimweak	Aqua	All	726	914	446	100	0.98	0.57	23/ 69/ 06	13/ 65/ 21	08/ 52/ 39	07/ 52/ 41	15/ 63/ 21	0.11	0.03 + 0.25*tau	-0.33 + 0.37*tau	0.04 + 0.21*tau	-0.08 + 0.29*tau	0.21	0.02	0	0.595	0.413	0.441
13	nocorr_fclimweak_nocloud	Aqua	All	659	830	425	85	0.98	0.58	26/ 67/ 06	13/ 65/ 20	08/ 53/ 38	08/ 55/ 36	16/ 63/ 20	0.11	0.03 + 0.25*tau	-0.45 + 0.42*tau	0.04 + 0.20*tau	-0.21 + 0.35*tau	0.21	0.02	0	0.613	0.406	0.452
13	nocorr_fclimstrong	Aqua	All	494	362	116	19	0.86	0.5	33/ 62/ 04	25/ 65/ 08	10/ 69/ 19	15/ 68/ 15	27/ 64/ 07	0.08	0.00 + 0.31*tau	****** + *******tau	0.08 + 0.12*tau	****** + *******tau	0.23	0.06	0.02	0.668	0.301	0.301
13	nocorr_fclimstrong_nocloud	Aqua	All	424	326	98	19	0.85	0.51	35/ 60/ 04	27/ 65/ 07	14/ 66/ 19	15/ 68/ 15	29/ 63/ 07	0.08	0.01 + 0.31*tau	****** + *******tau	0.06 + 0.17*tau	****** + *******tau	0.23	0.06	0.02	0.673	0.373	0.373
13	albcorr_fmatchedweak	Aqua	All	708	1008	536	109	0.98	0.54	09/ 84/ 05	13/ 65/ 21	07/ 50/ 41	07/ 52/ 40	10/ 67/ 22	0.12	0.03 + 0.25*tau	-0.33 + 0.38*tau	0.03 + 0.23*tau	-0.23 + 0.38*tau	0.21	0.01	0	0.616	0.444	0.477
13	albcorr_fmatchedweak_noclou	Aqua	All	651	955	499	95	0.97	0.54	10/ 84/ 04	14/ 65/ 20	08/ 50/ 41	08/ 50/ 41	11/ 67/ 21	0.12	0.02 + 0.25*tau	-0.49 + 0.46*tau	0.03 + 0.22*tau	-0.29 + 0.41*tau	0.21	0.01	0	0.625	0.439	0.478
13	albcorr_fmatchedstrong	Aqua	All	526	669	236	37	0.89	0.57	13/ 81/ 04	15/ 71/ 12	11/ 64/ 23	10/ 70/ 18	14/ 74/ 11	0.07	-0.00 + 0.26*tau	-0.42 + 0.45*tau	0.04 + 0.19*tau	-0.68 + 0.60*tau	0.22	0.02	0	0.579	0.369	0.427
13	albcorr_fmatchedstrong_nocl	Aqua	All	478	607	216	31	0.88	0.57	13/ 82/ 03	15/ 72/ 11	12/ 66/ 20	12/ 70/ 16	14/ 75/ 10	0.07	-0.00 + 0.26*tau	-0.58 + 0.53*tau	0.04 + 0.18*tau	-2.10 + 1.40*tau	0.23	0.02	0	0.605	0.377	0.59
13	albcorr_fclimweak	Aqua	All	669	974	462	96	0.98	0.6	10/ 83/ 06	11/ 68/ 20	08/ 53/ 38	08/ 55/ 36	10/ 69/ 20	0.1	0.02 + 0.24*tau	-0.25 + 0.32*tau	0.02 + 0.22*tau	-0.43 + 0.48*tau	0.2	0.01	0	0.594	0.422	0.478
13	albcorr_fclimweak_nocloud	Aqua	All	598	908	435	81	0.98	0.61	10/ 83/ 06	11/ 68/ 19	08/ 54/ 37	08/ 58/ 33	10/ 69/ 19	0.11	0.02 + 0.24*tau	-0.73 + 0.57*tau	0.03 + 0.20*tau	0.00 + 0.23*tau	0.2	0.01	0	0.617	0.41	0.43
13	albcorr_fclimstrong	Aqua	All	407	446	120	19	0.89	0.53	14/ 79/ 05	19/ 67/ 13	10/ 66/ 22	15/ 68/ 15	16/ 72/ 11	0.08	0.01 + 0.27*tau	****** + *******tau	0.06 + 0.14*tau	****** + *******tau	0.21	0.02	0	0.664	0.324	0.324
13	albcorr_fclimstrong_nocloud	Aqua	All	353	390	108	19	0.89	0.53	15/ 79/ 05	20/ 68/ 11	12/ 62/ 25	15/ 68/ 15	17/ 72/ 10	0.08	-0.01 + 0.30*tau	****** + *******tau	0.05 + 0.16*tau	****** + *******tau	0.21	0.01	0	0.668	0.355	0.355
13	corr1_fclimweak	Aqua	All	757	1027	373	60	0.87	0.62	11/ 82/ 06	18/ 69/ 12	14/ 65/ 19	13/ 63/ 23	14/ 73/ 11	0.09	0.00 + 0.26*tau	-0.37 + 0.42*tau	0.05 + 0.18*tau	0.02 + 0.25*tau	0.19	0.01	0	0.64	0.363	0.46
13	corr1_fclimweak_nocloud	Aqua	All	695	942	344	53	0.86	0.62	11/ 82/ 05	17/ 70/ 11	13/ 67/ 18	16/ 62/ 20	15/ 73/ 10	0.09	0.00 + 0.26*tau	-0.60 + 0.54*tau	0.05 + 0.18*tau	0.29 + 0.09*tau	0.2	0.01	0	0.671	0.37	0.458
13	corr1_fclimstrong	Aqua	All	449	447	90	13	0.8	0.54	16/ 77/ 06	27/ 63/ 08	15/ 71/ 13	23/ 69/ 07	21/ 70/ 07	0.07	-0.03 + 0.36*tau	****** + *******tau	0.09 + 0.12*tau	****** + *******tau	0.2	0.01	0	0.887	0.295	0.295
13	corr1_fclimstrong_nocloud	Aqua	All	391	395	78	13	0.8	0.55	16/ 77/ 05	30/ 62/ 07	14/ 71/ 14	23/ 69/ 07	23/ 69/ 07	0.07	-0.03 + 0.36*tau	****** + *******tau	0.08 + 0.15*tau	****** + *******tau	0.2	0	0	0.885	0.347	0.347
13	corr2_fmatchedweak	Aqua	All	817	1041	453	69	0.87	0.56	11/ 82/ 05	19/ 66/ 14	13/ 60/ 26	18/ 57/ 23	15/ 70/ 13	0.1	0.01 + 0.26*tau	-0.48 + 0.49*tau	0.06 + 0.17*tau	0.10 + 0.21*tau	0.2	0.01	0	0.689	0.367	0.475
13	corr2_fmatchedweak_nocloud	Aqua	All	756	975	427	56	0.85	0.57	12/ 82/ 04	20/ 66/ 13	14/ 60/ 25	19/ 58/ 21	16/ 70/ 12	0.1	0.00 + 0.27*tau	-0.63 + 0.57*tau	0.06 + 0.19*tau	0.45 + 0.00*tau	0.21	0.01	0	0.658	0.39	0.47
13	corr2_fmatchedstrong	Aqua	All	590	700	177	19	0.79	0.61	15/ 79/ 05	25/ 66/ 08	16/ 70/ 12	26/ 68/ 05	20/ 72/ 07	0.07	-0.01 + 0.31*tau	-0.57 + 0.57*tau	0.07 + 0.15*tau	****** + *******tau	0.21	0.01	0	0.866	0.332	0.332
13	corr2_fmatchedstrong_noclou	Aqua	All	539	638	148	22	0.78	0.58	15/ 79/ 04	26/ 66/ 07	16/ 71/ 12	22/ 77/ 00	21/ 72/ 06	0.07	-0.02 + 0.33*tau	-0.64 + 0.61*tau	0.08 + 0.15*tau	****** + *******tau	0.21	0.01	0	0.796	0.334	0.334
14	raw_nobuddy	Terra	All	444	944	375	11	0.91	0.49	45/ 49/ 04	17/ 54/ 27	12/ 57/ 30	09/ 63/ 27	23/ 54/ 22	0.17	0.07 + 0.15*tau	****** + *******tau	0.07 + 0.18*tau	****** + *******tau	0.23	0.03	0.01	0.438	0.358	0.358
14	raw_nosdcheck	Terra	All	448	932	369	11	0.9	0.5	45/ 50/ 04	18/ 54/ 26	12/ 57/ 30	09/ 63/ 27	23/ 54/ 21	0.17	0.07 + 0.16*tau	****** + *******tau	0.07 + 0.18*tau	****** + *******tau	0.23	0.03	0.01	0.44	0.349	0.349
14	raw	Terra	All	444	898	354	11	0.9	0.51	45/ 50/ 04	18/ 55/ 25	12/ 57/ 29	09/ 63/ 27	24/ 54/ 20	0.17	0.07 + 0.15*tau	****** + *******tau	0.07 + 0.17*tau	****** + *******tau	0.23	0.03	0	0.438	0.341	0.341
14	raw_fqa	Terra	All	361	569	235	3	0.87	0.6	54/ 44/ 01	19/ 65/ 14	13/ 66/ 19	00/100/ 00	29/ 59/ 11	0.11	0.05 + 0.16*tau	****** + *******tau	0.06 + 0.15*tau	****** + *******tau	0.2	0.04	0.01	-999	-999	-999
14	raw_fqa_nocloud	Terra	All	348	521	214	3	0.87	0.62	57/ 41/ 01	19/ 66/ 13	14/ 69/ 15	00/100/ 00	30/ 59/ 09	0.11	0.06 + 0.15*tau	****** + *******tau	0.06 + 0.15*tau	****** + *******tau	0.2	0.04	0.01	-999	-999	-999
14	nocorr_fmatchedweak	Terra	All	348	534	206	2	0.86	0.57	56/ 41/ 01	22/ 66/ 11	14/ 67/ 18	00/100/ 00	31/ 58/ 09	0.1	0.05 + 0.17*tau	****** + *******tau	0.07 + 0.13*tau	****** + *******tau	0.2	0.04	0.01	-999	-999	-999
14	nocorr_fmatchedweak_nocloud	Terra	All	339	488	188	2	0.85	0.6	58/ 39/ 01	21/ 67/ 10	15/ 69/ 14	00/100/ 00	33/ 58/ 08	0.1	0.05 + 0.17*tau	****** + *******tau	0.07 + 0.13*tau	****** + *******tau	0.2	0.04	0.01	-999	-999	-999
14	nocorr_fmatchedstrong	Terra	All	311	358	112	1	0.79	0.54	64/ 35/ 00	31/ 61/ 06	23/ 60/ 16	00/100/ 00	43/ 51/ 05	0.09	0.04 + 0.23*tau	****** + *******tau	0.07 + 0.17*tau	****** + *******tau	0.21	0.06	0.01	-999	-999	-999
14	nocorr_fmatchedstrong_noclo	Terra	All	301	324	99	1	0.79	0.56	68/ 31/ 00	33/ 59/ 06	24/ 62/ 13	00/100/ 00	46/ 48/ 04	0.09	0.05 + 0.21*tau	****** + *******tau	0.08 + 0.14*tau	****** + *******tau	0.21	0.07	0.02	-999	-999	-999
14	nocorr_fclimweak	Terra	All	357	510	208	2	0.85	0.59	56/ 42/ 01	23/ 67/ 09	16/ 66/ 16	00/100/ 00	32/ 58/ 08	0.09	0.04 + 0.18*tau	****** + *******tau	0.06 + 0.14*tau	****** + *******tau	0.2	0.04	0.01	-999	-999	-999
14	nocorr_fclimweak_nocloud	Terra	All	343	469	195	2	0.85	0.61	58/ 40/ 01	23/ 67/ 08	17/ 68/ 13	00/100/ 00	34/ 58/ 06	0.09	0.05 + 0.17*tau	****** + *******tau	0.06 + 0.14*tau	****** + *******tau	0.2	0.05	0.01	-999	-999	-999
14	nocorr_fclimstrong	Terra	All	274	285	86	2	0.77	0.51	70/ 29/ 00	34/ 57/ 08	26/ 56/ 16	00/100/ 00	48/ 45/ 05	0.1	0.05 + 0.22*tau	****** + *******tau	0.08 + 0.16*tau	****** + *******tau	0.21	0.06	0.02	-999	-999	-999
14	nocorr_fclimstrong_nocloud	Terra	All	259	265	73	1	0.77	0.57	74/ 25/ 00	35/ 56/ 07	27/ 58/ 13	00/100/ 00	51/ 43/ 05	0.1	0.06 + 0.20*tau	****** + *******tau	0.08 + 0.16*tau	****** + *******tau	0.21	0.07	0.02	-999	-999	-999
14	albcorr_fmatchedweak	Terra	All	337	543	209	2	0.86	0.58	46/ 52/ 00	21/ 68/ 10	14/ 66/ 18	00/100/ 00	27/ 63/ 08	0.09	0.04 + 0.18*tau	****** + *******tau	0.06 + 0.15*tau	****** + *******tau	0.2	0.02	0.01	-999	-999	-999
14	albcorr_fmatchedweak_noclou	Terra	All	334	493	190	2	0.85	0.61	49/ 49/ 00	21/ 69/ 09	16/ 68/ 14	00/100/ 00	29/ 63/ 07	0.09	0.04 + 0.18*tau	****** + *******tau	0.06 + 0.14*tau	****** + *******tau	0.2	0.02	0.01	-999	-999	-999
14	albcorr_fmatchedstrong	Terra	All	282	388	112	1	0.8	0.56	48/ 51/ 00	26/ 65/ 07	22/ 61/ 16	00/100/ 00	33/ 60/ 06	0.07	0.02 + 0.24*tau	****** + *******tau	0.06 + 0.17*tau	****** + *******tau	0.18	0.01	0	-999	-999	-999
14	albcorr_fmatchedstrong_nocl	Terra	All	276	349	100	1	0.8	0.58	50/ 48/ 00	26/ 65/ 08	23/ 64/ 13	00/100/ 00	35/ 59/ 05	0.07	0.03 + 0.22*tau	****** + *******tau	0.06 + 0.17*tau	****** + *******tau	0.18	0.01	0	-999	-999	-999
14	albcorr_fclimweak	Terra	All	323	525	225	2	0.88	0.61	44/ 53/ 01	19/ 70/ 09	14/ 65/ 20	00/100/ 00	26/ 64/ 09	0.08	0.04 + 0.16*tau	****** + *******tau	0.05 + 0.16*tau	****** + *******tau	0.18	0.01	0	-999	-999	-999
14	albcorr_fclimweak_nocloud	Terra	All	316	484	206	2	0.87	0.63	46/ 52/ 00	19/ 71/ 08	15/ 68/ 16	00/100/ 00	27/ 65/ 07	0.07	0.04 + 0.16*tau	****** + *******tau	0.06 + 0.14*tau	****** + *******tau	0.18	0.01	0	-999	-999	-999
14	albcorr_fclimstrong	Terra	All	245	309	95	2	0.81	0.55	43/ 56/ 00	26/ 65/ 08	23/ 61/ 15	00/100/ 00	32/ 61/ 06	0.07	0.04 + 0.20*tau	****** + *******tau	0.04 + 0.20*tau	****** + *******tau	0.18	0	0	-999	-999	-999
14	albcorr_fclimstrong_nocloud	Terra	All	232	282	85	1	0.81	0.61	45/ 53/ 00	26/ 65/ 07	24/ 62/ 12	00/100/ 00	33/ 60/ 05	0.07	0.04 + 0.19*tau	****** + *******tau	0.05 + 0.17*tau	****** + *******tau	0.18	0	0	-999	-999	-999
14	corr1_fclimweak	Terra	All	323	525	225	2	0.88	0.61	44/ 53/ 01	19/ 70/ 09	14/ 65/ 20	00/100/ 00	26/ 64/ 09	0.08	0.04 + 0.16*tau	****** + *******tau	0.05 + 0.16*tau	****** + *******tau	0.18	0.01	0	-999	-999	-999
14	corr1_fclimweak_nocloud	Terra	All	316	484	206	2	0.87	0.63	46/ 52/ 00	19/ 71/ 08	15/ 68/ 16	00/100/ 00	27/ 65/ 07	0.07	0.04 + 0.16*tau	****** + *******tau	0.06 + 0.14*tau	****** + *******tau	0.18	0.01	0	-999	-999	-999
14	corr1_fclimstrong	Terra	All	245	309	95	2	0.81	0.55	43/ 56/ 00	26/ 65/ 08	23/ 61/ 15	00/100/ 00	32/ 61/ 06	0.07	0.04 + 0.20*tau	****** + *******tau	0.04 + 0.20*tau	****** + *******tau	0.18	0	0	-999	-999	-999
14	corr1_fclimstrong_nocloud	Terra	All	232	282	85	1	0.81	0.61	45/ 53/ 00	26/ 65/ 07	24/ 62/ 12	00/100/ 00	33/ 60/ 05	0.07	0.04 + 0.19*tau	****** + *******tau	0.05 + 0.17*tau	****** + *******tau	0.18	0	0	-999	-999	-999
14	corr2_fmatchedweak	Terra	All	337	543	209	2	0.86	0.58	46/ 52/ 00	21/ 68/ 10	14/ 66/ 18	00/100/ 00	27/ 63/ 08	0.09	0.04 + 0.18*tau	****** + *******tau	0.06 + 0.15*tau	****** + *******tau	0.2	0.02	0.01	-999	-999	-999
14	corr2_fmatchedweak_nocloud	Terra	All	334	493	190	2	0.85	0.61	49/ 49/ 00	21/ 69/ 09	16/ 68/ 14	00/100/ 00	29/ 63/ 07	0.09	0.04 + 0.18*tau	****** + *******tau	0.06 + 0.14*tau	****** + *******tau	0.2	0.02	0.01	-999	-999	-999
14	corr2_fmatchedstrong	Terra	All	282	388	112	1	0.8	0.56	48/ 51/ 00	26/ 65/ 07	22/ 61/ 16	00/100/ 00	33/ 60/ 06	0.07	0.02 + 0.24*tau	****** + *******tau	0.06 + 0.17*tau	****** + *******tau	0.18	0.01	0	-999	-999	-999
14	corr2_fmatchedstrong_noclou	Terra	All	276	349	100	1	0.8	0.58	50/ 48/ 00	26/ 65/ 08	23/ 64/ 13	00/100/ 00	35/ 59/ 05	0.07	0.03 + 0.22*tau	****** + *******tau	0.06 + 0.17*tau	****** + *******tau	0.18	0.01	0	-999	-999	-999
14	raw_nobuddy	Aqua	All	388	948	376	7	0.93	0.48	46/ 46/ 06	15/ 51/ 33	09/ 57/ 33	00/ 57/ 42	21/ 51/ 27	0.2	0.08 + 0.13*tau	****** + *******tau	0.07 + 0.18*tau	****** + *******tau	0.23	0.03	0.02	-999	-999	-999
14	raw_nosdcheck	Aqua	All	392	923	362	8	0.92	0.48	47/ 46/ 05	15/ 51/ 33	09/ 56/ 33	00/ 62/ 37	21/ 51/ 26	0.19	0.08 + 0.13*tau	****** + *******tau	0.07 + 0.18*tau	****** + *******tau	0.23	0.03	0.02	-999	-999	-999
14	raw	Aqua	All	375	864	347	5	0.92	0.47	48/ 46/ 05	16/ 51/ 31	10/ 57/ 32	00/ 80/ 20	22/ 51/ 25	0.19	0.09 + 0.12*tau	****** + *******tau	0.07 + 0.17*tau	****** + *******tau	0.24	0.03	0.01	-999	-999	-999
14	raw_fqa	Aqua	All	278	479	171	1	0.9	0.59	56/ 41/ 02	18/ 62/ 18	09/ 65/ 24	00/100/ 00	28/ 56/ 14	0.13	0.07 + 0.13*tau	****** + *******tau	0.07 + 0.13*tau	****** + *******tau	0.21	0.04	0.02	-999	-999	-999
14	raw_fqa_nocloud	Aqua	All	271	445	143	1	0.88	0.6	55/ 42/ 02	20/ 62/ 16	09/ 69/ 20	00/100/ 00	30/ 57/ 12	0.11	0.06 + 0.14*tau	****** + *******tau	0.08 + 0.09*tau	****** + *******tau	0.21	0.05	0.01	-999	-999	-999
14	nocorr_fmatchedweak	Aqua	All	268	453	142	1	0.88	0.58	57/ 40/ 01	20/ 64/ 15	10/ 68/ 21	00/100/ 00	30/ 57/ 12	0.11	0.05 + 0.16*tau	****** + *******tau	0.06 + 0.13*tau	****** + *******tau	0.21	0.05	0.02	-999	-999	-999
14	nocorr_fmatchedweak_nocloud	Aqua	All	261	424	122	1	0.87	0.59	57/ 40/ 01	21/ 64/ 13	10/ 70/ 18	00/100/ 00	31/ 57/ 10	0.1	0.06 + 0.15*tau	****** + *******tau	0.07 + 0.11*tau	****** + *******tau	0.21	0.05	0.02	-999	-999	-999
14	nocorr_fmatchedstrong	Aqua	All	212	287	68	1	0.8	0.55	69/ 29/ 00	31/ 60/ 08	19/ 64/ 16	00/100/ 00	44/ 49/ 06	0.1	0.04 + 0.22*tau	****** + *******tau	0.10 + 0.08*tau	****** + *******tau	0.22	0.06	0.02	-999	-999	-999
14	nocorr_fmatchedstrong_noclo	Aqua	All	204	260	60	1	0.8	0.56	71/ 27/ 00	32/ 60/ 06	16/ 65/ 18	00/100/ 00	45/ 48/ 05	0.1	0.06 + 0.19*tau	****** + *******tau	0.10 + 0.09*tau	****** + *******tau	0.21	0.07	0.03	-999	-999	-999
14	nocorr_fclimweak	Aqua	All	271	429	133	1	0.87	0.59	59/ 39/ 01	22/ 66/ 10	10/ 66/ 22	00/100/ 00	32/ 57/ 09	0.09	0.06 + 0.15*tau	****** + *******tau	0.07 + 0.11*tau	****** + *******tau	0.2	0.04	0.02	-999	-999	-999
14	nocorr_fclimweak_nocloud	Aqua	All	268	397	113	1	0.86	0.61	58/ 40/ 00	23/ 66/ 09	09/ 68/ 22	00/100/ 00	33/ 58/ 08	0.09	0.05 + 0.17*tau	****** + *******tau	0.08 + 0.10*tau	****** + *******tau	0.21	0.05	0.02	-999	-999	-999
14	nocorr_fclimstrong	Aqua	All	202	204	54	1	0.79	0.55	72/ 27/ 00	38/ 56/ 04	16/ 59/ 24	00/100/ 00	50/ 44/ 05	0.1	0.06 + 0.21*tau	****** + *******tau	0.11 + 0.09*tau	****** + *******tau	0.23	0.07	0.02	-999	-999	-999
14	nocorr_fclimstrong_nocloud	Aqua	All	195	180	42	1	0.8	0.62	72/ 27/ 00	41/ 55/ 03	14/ 64/ 21	00/100/ 00	53/ 43/ 03	0.1	0.07 + 0.18*tau	****** + *******tau	0.12 + 0.07*tau	****** + *******tau	0.22	0.08	0.03	-999	-999	-999
14	albcorr_fmatchedweak	Aqua	All	256	469	143	1	0.88	0.59	53/ 46/ 00	19/ 66/ 14	10/ 67/ 21	00/100/ 00	27/ 60/ 11	0.1	0.05 + 0.15*tau	****** + *******tau	0.06 + 0.13*tau	****** + *******tau	0.2	0.03	0.01	-999	-999	-999
14	albcorr_fmatchedweak_noclou	Aqua	All	247	440	123	1	0.87	0.61	54/ 44/ 01	21/ 66/ 12	10/ 69/ 19	00/100/ 00	29/ 60/ 09	0.09	0.04 + 0.19*tau	****** + *******tau	0.06 + 0.12*tau	****** + *******tau	0.2	0.03	0.01	-999	-999	-999
14	albcorr_fmatchedstrong	Aqua	All	185	314	72	1	0.82	0.57	54/ 45/ 00	25/ 66/ 08	19/ 62/ 18	00/100/ 00	33/ 59/ 06	0.08	0.02 + 0.23*tau	****** + *******tau	0.06 + 0.15*tau	****** + *******tau	0.19	0.02	0	-999	-999	-999
14	albcorr_fmatchedstrong_nocl	Aqua	All	178	289	61	1	0.82	0.59	56/ 43/ 00	26/ 66/ 06	16/ 63/ 19	00/100/ 00	35/ 58/ 06	0.07	0.03 + 0.21*tau	****** + *******tau	0.08 + 0.12*tau	****** + *******tau	0.18	0.01	0	-999	-999	-999
14	albcorr_fclimweak	Aqua	All	250	444	144	1	0.89	0.62	49/ 50/ 00	18/ 68/ 13	09/ 67/ 23	00/100/ 00	25/ 62/ 11	0.08	0.06 + 0.13*tau	****** + *******tau	0.06 + 0.12*tau	****** + *******tau	0.19	0.02	0.01	-999	-999	-999
14	albcorr_fclimweak_nocloud	Aqua	All	244	413	124	1	0.88	0.62	51/ 47/ 00	19/ 69/ 11	08/ 68/ 23	00/100/ 00	27/ 62/ 09	0.08	0.04 + 0.16*tau	****** + *******tau	0.07 + 0.10*tau	****** + *******tau	0.19	0.02	0.01	-999	-999	-999
14	albcorr_fclimstrong	Aqua	All	172	229	61	1	0.83	0.59	53/ 45/ 00	26/ 65/ 08	14/ 62/ 22	00/100/ 00	34/ 57/ 07	0.07	0.04 + 0.20*tau	****** + *******tau	0.09 + 0.09*tau	****** + *******tau	0.19	0.01	0	-999	-999	-999
14	albcorr_fclimstrong_nocloud	Aqua	All	165	204	50	1	0.82	0.63	56/ 43/ 00	26/ 67/ 05	16/ 60/ 24	00/100/ 00	37/ 57/ 05	0.07	0.05 + 0.18*tau	****** + *******tau	0.08 + 0.11*tau	****** + *******tau	0.18	0.01	0	-999	-999	-999
14	corr1_fclimweak	Aqua	All	256	462	123	1	0.85	0.61	51/ 48/ 00	21/ 68/ 09	13/ 69/ 17	00/100/ 00	29/ 62/ 08	0.08	0.03 + 0.20*tau	****** + *******tau	0.07 + 0.12*tau	****** + *******tau	0.18	0.02	0.01	-999	-999	-999
14	corr1_fclimweak_nocloud	Aqua	All	247	428	106	1	0.84	0.62	52/ 46/ 00	22/ 67/ 09	14/ 72/ 13	00/100/ 00	30/ 62/ 07	0.08	0.03 + 0.21*tau	****** + *******tau	0.07 + 0.11*tau	****** + *******tau	0.18	0.02	0.01	-999	-999	-999
14	corr1_fclimstrong	Aqua	All	174	234	54	1	0.79	0.59	54/ 44/ 00	31/ 64/ 04	16/ 62/ 20	00/100/ 00	38/ 57/ 04	0.07	0.03 + 0.24*tau	****** + *******tau	0.09 + 0.10*tau	****** + *******tau	0.18	0.01	0	-999	-999	-999
14	corr1_fclimstrong_nocloud	Aqua	All	170	207	42	1	0.79	0.63	57/ 42/ 00	32/ 64/ 02	16/ 66/ 16	00/100/ 00	40/ 55/ 03	0.07	0.04 + 0.21*tau	****** + *******tau	0.08 + 0.12*tau	****** + *******tau	0.18	0.01	0	-999	-999	-999
14	corr2_fmatchedweak	Aqua	All	258	494	119	1	0.84	0.59	53/ 46/ 00	21/ 66/ 11	13/ 73/ 13	00/100/ 00	29/ 61/ 08	0.09	0.02 + 0.22*tau	****** + *******tau	0.06 + 0.15*tau	****** + *******tau	0.2	0.03	0.01	-999	-999	-999
14	corr2_fmatchedweak_nocloud	Aqua	All	253	455	103	1	0.83	0.61	53/ 45/ 01	22/ 66/ 10	12/ 75/ 11	00/100/ 00	30/ 61/ 07	0.08	0.02 + 0.22*tau	****** + *******tau	0.07 + 0.13*tau	****** + *******tau	0.2	0.03	0.01	-999	-999	-999
14	corr2_fmatchedstrong	Aqua	All	189	326	59	1	0.78	0.57	55/ 44/ 00	30/ 62/ 07	20/ 66/ 13	00/100/ 00	37/ 57/ 05	0.08	0.02 + 0.25*tau	****** + *******tau	0.08 + 0.13*tau	****** + *******tau	0.19	0.02	0	-999	-999	-999
14	corr2_fmatchedstrong_noclou	Aqua	All	182	299	48	1	0.78	0.59	56/ 43/ 00	30/ 62/ 06	16/ 68/ 14	00/100/ 00	38/ 56/ 04	0.07	0.02 + 0.24*tau	****** + *******tau	0.07 + 0.15*tau	****** + *******tau	0.18	0.01	0	-999	-999	-999
15	raw_nobuddy	Terra	All	119	642	520	29	1.07	0.51	05/ 54/ 40	07/ 60/ 31	03/ 54/ 41	00/ 41/ 58	05/ 57/ 37	0.25	0.10 + 0.10*tau	****** + *******tau	0.03 + 0.22*tau	0.08 + 0.23*tau	0.16	0.01	0	0.549	0.38	0.453
15	raw_nosdcheck	Terra	All	117	643	512	29	1.06	0.51	05/ 55/ 39	07/ 60/ 31	03/ 55/ 40	00/ 41/ 58	05/ 57/ 36	0.25	0.10 + 0.10*tau	****** + *******tau	0.03 + 0.22*tau	0.38 + 0.01*tau	0.16	0.01	0	0.551	0.379	0.412
15	raw	Terra	All	115	633	493	29	1.06	0.52	05/ 58/ 36	07/ 60/ 31	03/ 56/ 39	00/ 41/ 58	05/ 58/ 35	0.24	0.09 + 0.11*tau	****** + *******tau	0.03 + 0.21*tau	0.31 + 0.08*tau	0.16	0.01	0	0.551	0.372	0.432
15	raw_fqa	Terra	All	90	415	314	11	1.02	0.55	04/ 64/ 31	08/ 70/ 20	03/ 65/ 31	09/ 45/ 45	06/ 67/ 26	0.23	0.07 + 0.10*tau	****** + *******tau	0.02 + 0.19*tau	****** + *******tau	0.13	0.02	0	0.437	0.304	0.304
15	raw_fqa_nocloud	Terra	All	83	415	301	11	1.02	0.56	04/ 68/ 26	08/ 71/ 20	02/ 66/ 30	09/ 45/ 45	05/ 68/ 25	0.22	0.07 + 0.09*tau	****** + *******tau	0.03 + 0.18*tau	****** + *******tau	0.13	0.02	0	0.425	0.297	0.297
15	nocorr_fmatchedweak	Terra	All	90	402	269	8	1.01	0.53	04/ 65/ 30	08/ 71/ 20	03/ 67/ 28	12/ 62/ 25	06/ 69/ 24	0.24	0.07 + 0.09*tau	****** + *******tau	0.03 + 0.18*tau	****** + *******tau	0.13	0.02	0.01	-999	-999	-999
15	nocorr_fmatchedweak_nocloud	Terra	All	83	396	263	7	1.01	0.56	04/ 69/ 25	08/ 71/ 19	03/ 66/ 30	14/ 57/ 28	06/ 69/ 23	0.22	0.07 + 0.09*tau	****** + *******tau	0.03 + 0.17*tau	****** + *******tau	0.13	0.02	0.01	-999	-999	-999
15	nocorr_fmatchedstrong	Terra	All	82	174	52	1	0.94	0.52	04/ 63/ 31	10/ 72/ 17	05/ 76/ 17	00/ 00/100	08/ 70/ 21	0.18	0.03 + 0.14*tau	****** + *******tau	0.07 + 0.11*tau	****** + *******tau	0.18	0.04	0.01	-999	-999	-999
15	nocorr_fmatchedstrong_noclo	Terra	All	76	166	49	1	0.94	0.5	06/ 64/ 28	10/ 73/ 15	06/ 73/ 20	00/ 00/100	08/ 70/ 20	0.18	0.00 + 0.20*tau	****** + *******tau	0.04 + 0.17*tau	****** + *******tau	0.17	0.04	0.01	-999	-999	-999
15	nocorr_fclimweak	Terra	All	89	388	260	5	0.99	0.56	04/ 66/ 29	09/ 71/ 19	04/ 68/ 27	00/ 40/ 60	06/ 69/ 23	0.23	0.05 + 0.12*tau	****** + *******tau	0.03 + 0.16*tau	****** + *******tau	0.14	0.02	0.01	-999	-999	-999
15	nocorr_fclimweak_nocloud	Terra	All	84	386	246	5	0.98	0.58	04/ 69/ 26	08/ 72/ 19	04/ 69/ 26	00/ 40/ 60	06/ 70/ 22	0.21	0.05 + 0.12*tau	****** + *******tau	0.04 + 0.16*tau	****** + *******tau	0.13	0.02	0.01	-999	-999	-999
15	nocorr_fclimstrong	Terra	All	74	113	40	0	0.93	0.39	06/ 55/ 37	14/ 62/ 23	10/ 52/ 37	00/ 00/ 00	11/ 58/ 30	0.22	0.05 + 0.12*tau	****** + *******tau	0.04 + 0.22*tau	****** + *******tau	0.2	0.06	0.01	-999	-999	-999
15	nocorr_fclimstrong_nocloud	Terra	All	69	107	35	0	0.92	0.36	07/ 56/ 36	15/ 63/ 20	08/ 57/ 34	00/ 00/ 00	11/ 60/ 27	0.22	0.06 + 0.12*tau	****** + *******tau	0.03 + 0.25*tau	****** + *******tau	0.19	0.06	0.01	-999	-999	-999
15	albcorr_fmatchedweak	Terra	All	89	400	269	8	1	0.54	11/ 59/ 29	09/ 72/ 18	03/ 67/ 28	12/ 62/ 25	07/ 68/ 23	0.24	0.06 + 0.10*tau	****** + *******tau	0.04 + 0.16*tau	****** + *******tau	0.15	0	0	-999	-999	-999
15	albcorr_fmatchedweak_noclou	Terra	All	87	394	263	7	1	0.56	11/ 59/ 28	09/ 72/ 17	03/ 67/ 29	14/ 57/ 28	07/ 69/ 23	0.22	0.06 + 0.11*tau	****** + *******tau	0.04 + 0.16*tau	****** + *******tau	0.15	0	0	-999	-999	-999
15	albcorr_fmatchedstrong	Terra	All	70	184	53	1	0.95	0.55	02/ 61/ 35	07/ 72/ 20	05/ 75/ 18	00/ 00/100	06/ 70/ 23	0.19	0.04 + 0.12*tau	****** + *******tau	0.07 + 0.10*tau	****** + *******tau	0.16	0	0	-999	-999	-999
15	albcorr_fmatchedstrong_nocl	Terra	All	68	174	49	1	0.94	0.53	02/ 60/ 36	08/ 73/ 18	06/ 73/ 20	00/ 00/100	06/ 70/ 23	0.19	-0.00 + 0.20*tau	****** + *******tau	0.04 + 0.17*tau	****** + *******tau	0.16	0.01	0	-999	-999	-999
15	albcorr_fclimweak	Terra	All	88	419	234	4	0.96	0.58	07/ 59/ 32	10/ 73/ 16	03/ 73/ 22	00/ 50/ 50	07/ 71/ 20	0.24	0.03 + 0.14*tau	****** + *******tau	0.04 + 0.16*tau	****** + *******tau	0.14	0	0	-999	-999	-999
15	albcorr_fclimweak_nocloud	Terra	All	84	413	223	4	0.96	0.59	08/ 61/ 29	10/ 72/ 17	03/ 74/ 21	00/ 50/ 50	07/ 71/ 20	0.22	0.04 + 0.13*tau	****** + *******tau	0.05 + 0.13*tau	****** + *******tau	0.14	0	0	-999	-999	-999
15	albcorr_fclimstrong	Terra	All	66	123	40	0	0.96	0.42	01/ 51/ 46	08/ 63/ 27	05/ 57/ 37	00/ 00/ 00	06/ 58/ 34	0.23	0.06 + 0.10*tau	****** + *******tau	0.03 + 0.25*tau	****** + *******tau	0.18	0	0	-999	-999	-999
15	albcorr_fclimstrong_nocloud	Terra	All	60	116	36	0	0.95	0.4	01/ 55/ 43	09/ 64/ 25	05/ 61/ 33	00/ 00/ 00	06/ 61/ 32	0.24	0.06 + 0.10*tau	****** + *******tau	0.08 + 0.12*tau	****** + *******tau	0.18	0	0	-999	-999	-999
15	corr1_fclimweak	Terra	All	83	348	299	10	1.07	0.55	08/ 59/ 32	05/ 70/ 24	03/ 62/ 34	10/ 40/ 50	05/ 65/ 29	0.27	0.08 + 0.09*tau	****** + *******tau	0.02 + 0.20*tau	****** + *******tau	0.14	0.01	0	-999	-999	-999
15	corr1_fclimweak_nocloud	Terra	All	77	353	283	9	1.06	0.57	09/ 61/ 29	05/ 69/ 24	03/ 63/ 32	11/ 44/ 44	04/ 66/ 28	0.25	0.08 + 0.09*tau	****** + *******tau	0.03 + 0.18*tau	****** + *******tau	0.14	0	0	-999	-999	-999
15	corr1_fclimstrong	Terra	All	63	121	44	0	1.07	0.43	01/ 52/ 46	05/ 62/ 31	00/ 59/ 40	00/ 00/ 00	03/ 59/ 37	0.26	0.10 + 0.04*tau	****** + *******tau	0.03 + 0.26*tau	****** + *******tau	0.18	0.01	0	-999	-999	-999
15	corr1_fclimstrong_nocloud	Terra	All	56	114	41	0	1.06	0.41	01/ 55/ 42	06/ 64/ 29	00/ 58/ 41	00/ 00/ 00	03/ 60/ 35	0.27	0.08 + 0.06*tau	****** + *******tau	0.00 + 0.31*tau	****** + *******tau	0.18	0	0	-999	-999	-999
15	corr2_fmatchedweak	Terra	All	83	342	327	10	1.11	0.53	12/ 60/ 27	05/ 70/ 23	02/ 56/ 41	00/ 60/ 40	04/ 63/ 32	0.27	0.09 + 0.09*tau	****** + *******tau	0.01 + 0.23*tau	****** + *******tau	0.15	0	0	-999	-999	-999
15	corr2_fmatchedweak_nocloud	Terra	All	82	338	320	10	1.11	0.55	12/ 59/ 28	04/ 72/ 23	02/ 57/ 40	00/ 60/ 40	04/ 64/ 31	0.24	0.10 + 0.07*tau	****** + *******tau	0.01 + 0.23*tau	****** + *******tau	0.15	0	0	-999	-999	-999
15	corr2_fmatchedstrong	Terra	All	65	161	77	1	1.05	0.55	03/ 64/ 32	04/ 70/ 24	02/ 59/ 37	00/ 00/100	03/ 66/ 29	0.22	0.06 + 0.10*tau	****** + *******tau	0.05 + 0.16*tau	****** + *******tau	0.18	0	0	-999	-999	-999
15	corr2_fmatchedstrong_noclou	Terra	All	64	157	69	1	1.05	0.54	03/ 62/ 34	03/ 72/ 23	02/ 60/ 36	00/ 00/100	03/ 67/ 29	0.22	0.06 + 0.10*tau	****** + *******tau	0.07 + 0.11*tau	****** + *******tau	0.17	0.01	0	-999	-999	-999
15	raw_nobuddy	Aqua	All	93	630	528	26	1.07	0.44	05/ 51/ 43	10/ 54/ 35	04/ 51/ 44	00/ 23/ 76	07/ 52/ 40	0.27	0.12 + 0.10*tau	****** + *******tau	0.03 + 0.24*tau	****** + *******tau	0.16	0	0	0.742	0.453	0.453
15	raw_nosdcheck	Aqua	All	93	629	514	26	1.06	0.44	05/ 50/ 44	10/ 54/ 34	04/ 52/ 42	00/ 26/ 73	07/ 52/ 39	0.27	0.11 + 0.11*tau	****** + *******tau	0.04 + 0.23*tau	****** + *******tau	0.16	0	0	0.719	0.436	0.436
15	raw	Aqua	All	89	612	495	25	1.05	0.45	05/ 51/ 42	10/ 54/ 34	05/ 53/ 41	00/ 28/ 72	07/ 53/ 38	0.26	0.10 + 0.11*tau	****** + *******tau	0.04 + 0.22*tau	****** + *******tau	0.16	0	0	0.73	0.428	0.428
15	raw_fqa	Aqua	All	73	361	271	10	1.03	0.5	08/ 56/ 35	11/ 63/ 24	04/ 59/ 36	00/ 30/ 70	08/ 60/ 30	0.23	0.07 + 0.13*tau	****** + *******tau	0.03 + 0.20*tau	****** + *******tau	0.13	0.01	0	-999	-999	-999
15	raw_fqa_nocloud	Aqua	All	66	354	256	10	1.02	0.51	09/ 62/ 28	11/ 63/ 24	04/ 60/ 35	00/ 30/ 70	08/ 61/ 29	0.22	0.07 + 0.13*tau	****** + *******tau	0.03 + 0.19*tau	****** + *******tau	0.12	0.01	0	-999	-999	-999
15	nocorr_fmatchedweak	Aqua	All	73	357	229	7	1.01	0.48	08/ 54/ 36	11/ 64/ 24	05/ 61/ 33	00/ 42/ 57	09/ 61/ 29	0.23	0.06 + 0.13*tau	****** + *******tau	0.03 + 0.19*tau	****** + *******tau	0.13	0.01	0	-999	-999	-999
15	nocorr_fmatchedweak_nocloud	Aqua	All	66	350	214	7	1.01	0.48	09/ 62/ 28	11/ 64/ 23	05/ 61/ 33	00/ 42/ 57	09/ 63/ 27	0.22	0.06 + 0.13*tau	****** + *******tau	0.04 + 0.18*tau	****** + *******tau	0.13	0.01	0.01	-999	-999	-999
15	nocorr_fmatchedstrong	Aqua	All	64	151	48	0	0.94	0.38	07/ 53/ 39	17/ 66/ 15	06/ 50/ 43	00/ 00/ 00	13/ 60/ 26	0.2	0.03 + 0.19*tau	****** + *******tau	0.05 + 0.18*tau	****** + *******tau	0.17	0.02	0.01	-999	-999	-999
15	nocorr_fmatchedstrong_noclo	Aqua	All	56	141	44	0	0.94	0.4	08/ 62/ 28	18/ 68/ 13	06/ 50/ 43	00/ 00/ 00	14/ 63/ 22	0.18	0.02 + 0.22*tau	****** + *******tau	0.01 + 0.27*tau	****** + *******tau	0.17	0.03	0.01	-999	-999	-999
15	nocorr_fclimweak	Aqua	All	74	331	227	7	1	0.52	08/ 56/ 35	11/ 66/ 21	05/ 62/ 31	00/ 42/ 57	08/ 64/ 27	0.23	0.06 + 0.12*tau	****** + *******tau	0.04 + 0.18*tau	****** + *******tau	0.14	0.01	0	-999	-999	-999
15	nocorr_fclimweak_nocloud	Aqua	All	67	325	213	7	1	0.53	08/ 62/ 28	11/ 67/ 20	05/ 63/ 31	00/ 42/ 57	08/ 65/ 25	0.21	0.06 + 0.13*tau	****** + *******tau	0.04 + 0.17*tau	****** + *******tau	0.14	0.01	0.01	-999	-999	-999
15	nocorr_fclimstrong	Aqua	All	60	93	25	0	0.89	0.29	08/ 58/ 33	20/ 59/ 20	12/ 56/ 32	00/ 00/ 00	15/ 58/ 26	0.21	-0.00 + 0.27*tau	****** + *******tau	0.04 + 0.27*tau	****** + *******tau	0.19	0.02	0.01	-999	-999	-999
15	nocorr_fclimstrong_nocloud	Aqua	All	53	87	22	0	0.88	0.34	09/ 60/ 30	21/ 63/ 14	13/ 54/ 31	00/ 00/ 00	16/ 61/ 22	0.17	0.02 + 0.23*tau	****** + *******tau	0.04 + 0.22*tau	****** + *******tau	0.18	0.03	0.02	-999	-999	-999
15	albcorr_fmatchedweak	Aqua	All	79	352	226	7	1	0.48	03/ 58/ 37	13/ 66/ 19	05/ 61/ 33	00/ 42/ 57	09/ 63/ 26	0.23	0.05 + 0.16*tau	****** + *******tau	0.05 + 0.17*tau	****** + *******tau	0.14	0	0	-999	-999	-999
15	albcorr_fmatchedweak_noclou	Aqua	All	71	344	214	7	1	0.48	05/ 59/ 35	14/ 67/ 18	05/ 61/ 33	00/ 42/ 57	10/ 64/ 25	0.22	0.06 + 0.14*tau	****** + *******tau	0.04 + 0.18*tau	****** + *******tau	0.14	0	0	-999	-999	-999
15	albcorr_fmatchedstrong	Aqua	All	61	155	48	0	0.94	0.39	01/ 50/ 47	18/ 65/ 16	06/ 50/ 43	00/ 00/ 00	12/ 59/ 28	0.21	0.01 + 0.22*tau	****** + *******tau	0.05 + 0.20*tau	****** + *******tau	0.17	0	0	-999	-999	-999
15	albcorr_fmatchedstrong_nocl	Aqua	All	53	145	44	0	0.94	0.41	03/ 50/ 45	20/ 66/ 13	06/ 50/ 43	00/ 00/ 00	14/ 60/ 25	0.19	0.04 + 0.16*tau	****** + *******tau	0.04 + 0.18*tau	****** + *******tau	0.16	0	0	-999	-999	-999
15	albcorr_fclimweak	Aqua	All	77	343	216	5	0.98	0.52	05/ 54/ 40	13/ 67/ 18	06/ 63/ 30	20/ 40/ 40	10/ 64/ 25	0.24	0.03 + 0.17*tau	****** + *******tau	0.04 + 0.17*tau	****** + *******tau	0.14	0	0	-999	-999	-999
15	albcorr_fclimweak_nocloud	Aqua	All	70	337	201	5	0.98	0.53	07/ 54/ 38	14/ 68/ 16	04/ 65/ 29	20/ 40/ 40	10/ 65/ 23	0.22	0.04 + 0.15*tau	****** + *******tau	0.04 + 0.16*tau	****** + *******tau	0.14	0	0	-999	-999	-999
15	albcorr_fclimstrong	Aqua	All	53	98	27	0	0.92	0.33	00/ 45/ 54	18/ 60/ 21	03/ 59/ 37	00/ 00/ 00	10/ 55/ 33	0.23	0.01 + 0.24*tau	****** + *******tau	0.02 + 0.28*tau	****** + *******tau	0.18	0.01	0	-999	-999	-999
15	albcorr_fclimstrong_nocloud	Aqua	All	47	93	22	0	0.91	0.38	00/ 51/ 48	20/ 62/ 17	04/ 59/ 36	00/ 00/ 00	12/ 58/ 29	0.19	0.03 + 0.20*tau	****** + *******tau	0.03 + 0.23*tau	****** + *******tau	0.16	0.01	0	-999	-999	-999
15	corr1_fclimweak	Aqua	All	69	304	260	7	1.08	0.54	04/ 55/ 40	08/ 65/ 26	02/ 57/ 40	00/ 42/ 57	05/ 60/ 33	0.26	0.07 + 0.13*tau	****** + *******tau	0.02 + 0.22*tau	****** + *******tau	0.14	0	0	-999	-999	-999
15	corr1_fclimweak_nocloud	Aqua	All	65	293	248	7	1.08	0.54	06/ 55/ 38	08/ 66/ 24	02/ 58/ 39	00/ 42/ 57	05/ 61/ 32	0.25	0.08 + 0.11*tau	****** + *******tau	0.02 + 0.21*tau	****** + *******tau	0.14	0	0	-999	-999	-999
15	corr1_fclimstrong	Aqua	All	47	94	36	1	1	0.35	00/ 46/ 53	12/ 61/ 25	02/ 47/ 50	00/ 00/100	07/ 54/ 38	0.25	0.06 + 0.13*tau	****** + *******tau	0.00 + 0.31*tau	****** + *******tau	0.19	0.01	0	-999	-999	-999
15	corr1_fclimstrong_nocloud	Aqua	All	42	89	31	0	1.01	0.42	00/ 52/ 47	13/ 65/ 21	00/ 51/ 48	00/ 00/ 00	07/ 59/ 33	0.21	0.08 + 0.08*tau	****** + *******tau	0.03 + 0.24*tau	****** + *******tau	0.17	0.01	0	-999	-999	-999
15	corr2_fmatchedweak	Aqua	All	70	313	270	9	1.11	0.48	04/ 57/ 38	09/ 62/ 27	02/ 48/ 48	00/ 33/ 66	06/ 56/ 37	0.26	0.08 + 0.14*tau	****** + *******tau	0.01 + 0.26*tau	****** + *******tau	0.15	0	0	-999	-999	-999
15	corr2_fmatchedweak_nocloud	Aqua	All	66	299	262	9	1.11	0.48	06/ 57/ 36	10/ 64/ 25	02/ 48/ 48	00/ 33/ 66	06/ 57/ 36	0.24	0.09 + 0.12*tau	****** + *******tau	0.01 + 0.26*tau	****** + *******tau	0.14	0	0	-999	-999	-999
15	corr2_fmatchedstrong	Aqua	All	52	144	66	0	1.05	0.42	01/ 48/ 50	08/ 67/ 24	03/ 50/ 46	00/ 00/ 00	05/ 59/ 35	0.23	0.07 + 0.12*tau	****** + *******tau	0.03 + 0.23*tau	****** + *******tau	0.17	0	0	-999	-999	-999
15	corr2_fmatchedstrong_noclou	Aqua	All	48	134	59	0	1.05	0.43	04/ 47/ 47	08/ 71/ 20	03/ 52/ 44	00/ 00/ 00	06/ 62/ 31	0.21	0.06 + 0.14*tau	****** + *******tau	-0.03 + 0.35*tau	****** + *******tau	0.17	0	0	-999	-999	-999
16	raw_nobuddy	Terra	All	22	68	9	0	0.83	0.23	45/ 50/ 04	16/ 52/ 30	33/ 00/ 66	00/ 00/ 00	24/ 47/ 28	0.14	-0.03 + 0.48*tau	****** + *******tau	-0.06 + 0.58*tau	****** + *******tau	0.3	0	0	-999	-999	-999
16	raw_nosdcheck	Terra	All	24	63	6	0	0.82	0.24	50/ 45/ 04	15/ 55/ 28	33/ 00/ 66	00/ 00/ 00	25/ 49/ 24	0.15	-0.04 + 0.49*tau	****** + *******tau	-0.05 + 0.55*tau	****** + *******tau	0.29	0	0	-999	-999	-999
16	raw	Terra	All	22	49	4	0	0.72	0.42	45/ 50/ 04	18/ 55/ 26	75/ 00/ 25	00/ 00/ 00	29/ 50/ 20	0.12	****** + *******tau	****** + *******tau	****** + *******tau	****** + *******tau	0.33	0	0	-999	-999	-999
16	raw_fqa	Terra	All	6	10	0	0	0.52	0.4	50/ 50/ 00	60/ 40/ 00	00/ 00/ 00	00/ 00/ 00	56/ 43/ 00	0.06	****** + *******tau	****** + *******tau	****** + *******tau	****** + *******tau	0.35	0	0	-999	-999	-999
16	raw_fqa_nocloud	Terra	All	4	6	0	0	0.46	0.36	75/ 25/ 00	50/ 50/ 00	00/ 00/ 00	00/ 00/ 00	60/ 40/ 00	0.07	****** + *******tau	****** + *******tau	****** + *******tau	****** + *******tau	0.33	0	0	-999	-999	-999
16	nocorr_fmatchedweak	Terra	All	6	9	0	0	0.51	0.36	66/ 33/ 00	55/ 44/ 00	00/ 00/ 00	00/ 00/ 00	60/ 40/ 00	0.07	****** + *******tau	****** + *******tau	****** + *******tau	****** + *******tau	0.29	0	0	-999	-999	-999
16	nocorr_fmatchedweak_nocloud	Terra	All	4	6	0	0	0.45	0.35	75/ 25/ 00	50/ 50/ 00	00/ 00/ 00	00/ 00/ 00	60/ 40/ 00	0.07	****** + *******tau	****** + *******tau	****** + *******tau	****** + *******tau	0.32	0	0	-999	-999	-999
16	nocorr_fmatchedstrong	Terra	All	6	9	0	0	0.43	0.34	50/ 50/ 00	66/ 33/ 00	00/ 00/ 00	00/ 00/ 00	60/ 40/ 00	0.07	****** + *******tau	****** + *******tau	****** + *******tau	****** + *******tau	0.29	0	0	-999	-999	-999
16	nocorr_fmatchedstrong_noclo	Terra	All	4	7	0	0	0.41	0.18	75/ 25/ 00	57/ 42/ 00	00/ 00/ 00	00/ 00/ 00	63/ 36/ 00	0.07	****** + *******tau	****** + *******tau	****** + *******tau	****** + *******tau	0.28	0	0	-999	-999	-999
16	nocorr_fclimweak	Terra	All	5	9	0	0	0.48	0.55	60/ 40/ 00	55/ 44/ 00	00/ 00/ 00	00/ 00/ 00	57/ 42/ 00	0.07	****** + *******tau	****** + *******tau	****** + *******tau	****** + *******tau	0.32	0	0	-999	-999	-999
16	nocorr_fclimweak_nocloud	Terra	All	4	6	0	0	0.44	0.49	75/ 25/ 00	50/ 50/ 00	00/ 00/ 00	00/ 00/ 00	60/ 40/ 00	0.07	****** + *******tau	****** + *******tau	****** + *******tau	****** + *******tau	0.26	0	0	-999	-999	-999
16	nocorr_fclimstrong	Terra	All	3	6	0	0	0.38	0.31	66/ 33/ 00	83/ 16/ 00	00/ 00/ 00	00/ 00/ 00	77/ 22/ 00	0	****** + *******tau	****** + *******tau	****** + *******tau	****** + *******tau	0.21	0	0	-999	-999	-999
16	nocorr_fclimstrong_nocloud	Terra	All	3	5	0	0	0.36	0.1	66/ 33/ 00	80/ 20/ 00	00/ 00/ 00	00/ 00/ 00	75/ 25/ 00	0	****** + *******tau	****** + *******tau	****** + *******tau	****** + *******tau	0.22	0	0	-999	-999	-999
16	albcorr_fmatchedweak	Terra	All	5	11	0	0	0.52	0.41	20/ 80/ 00	63/ 36/ 00	00/ 00/ 00	00/ 00/ 00	50/ 50/ 00	0.05	****** + *******tau	****** + *******tau	****** + *******tau	****** + *******tau	0.31	0	0	-999	-999	-999
16	albcorr_fmatchedweak_noclou	Terra	All	3	8	0	0	0.47	0.47	33/ 66/ 00	62/ 37/ 00	00/ 00/ 00	00/ 00/ 00	54/ 45/ 00	0.06	****** + *******tau	****** + *******tau	****** + *******tau	****** + *******tau	0.3	0	0	-999	-999	-999
16	albcorr_fmatchedstrong	Terra	All	5	10	0	0	0.46	0.42	20/ 60/ 20	70/ 30/ 00	00/ 00/ 00	00/ 00/ 00	53/ 40/ 06	0.06	****** + *******tau	****** + *******tau	****** + *******tau	****** + *******tau	0.23	0	0	-999	-999	-999
16	albcorr_fmatchedstrong_nocl	Terra	All	3	8	0	0	0.44	0.3	33/ 33/ 33	62/ 37/ 00	00/ 00/ 00	00/ 00/ 00	54/ 36/ 09	0.07	****** + *******tau	****** + *******tau	****** + *******tau	****** + *******tau	0.27	0	0	-999	-999	-999
16	albcorr_fclimweak	Terra	All	4	11	0	0	0.51	0.6	25/ 75/ 00	63/ 36/ 00	00/ 00/ 00	00/ 00/ 00	53/ 46/ 00	0.06	****** + *******tau	****** + *******tau	****** + *******tau	****** + *******tau	0.27	0	0	-999	-999	-999
16	albcorr_fclimweak_nocloud	Terra	All	3	8	0	0	0.48	0.57	33/ 66/ 00	62/ 37/ 00	00/ 00/ 00	00/ 00/ 00	54/ 45/ 00	0.06	****** + *******tau	****** + *******tau	****** + *******tau	****** + *******tau	0.21	0	0	-999	-999	-999
16	albcorr_fclimstrong	Terra	All	2	8	0	0	0.43	0.43	50/ 50/ 00	75/ 25/ 00	00/ 00/ 00	00/ 00/ 00	70/ 30/ 00	0.05	****** + *******tau	****** + *******tau	****** + *******tau	****** + *******tau	0.2	0	0	-999	-999	-999
16	albcorr_fclimstrong_nocloud	Terra	All	2	7	0	0	0.4	0.34	50/ 50/ 00	71/ 28/ 00	00/ 00/ 00	00/ 00/ 00	66/ 33/ 00	0.05	****** + *******tau	****** + *******tau	****** + *******tau	****** + *******tau	0.16	0	0	-999	-999	-999
16	corr1_fclimweak	Terra	All	4	11	0	0	0.51	0.6	25/ 75/ 00	63/ 36/ 00	00/ 00/ 00	00/ 00/ 00	53/ 46/ 00	0.06	****** + *******tau	****** + *******tau	****** + *******tau	****** + *******tau	0.27	0	0	-999	-999	-999
16	corr1_fclimweak_nocloud	Terra	All	3	8	0	0	0.48	0.57	33/ 66/ 00	62/ 37/ 00	00/ 00/ 00	00/ 00/ 00	54/ 45/ 00	0.06	****** + *******tau	****** + *******tau	****** + *******tau	****** + *******tau	0.21	0	0	-999	-999	-999
16	corr1_fclimstrong	Terra	All	2	8	0	0	0.43	0.43	50/ 50/ 00	75/ 25/ 00	00/ 00/ 00	00/ 00/ 00	70/ 30/ 00	0.05	****** + *******tau	****** + *******tau	****** + *******tau	****** + *******tau	0.2	0	0	-999	-999	-999
16	corr1_fclimstrong_nocloud	Terra	All	2	7	0	0	0.4	0.34	50/ 50/ 00	71/ 28/ 00	00/ 00/ 00	00/ 00/ 00	66/ 33/ 00	0.05	****** + *******tau	****** + *******tau	****** + *******tau	****** + *******tau	0.16	0	0	-999	-999	-999
16	corr2_fmatchedweak	Terra	All	5	11	0	0	0.52	0.41	20/ 80/ 00	63/ 36/ 00	00/ 00/ 00	00/ 00/ 00	50/ 50/ 00	0.05	****** + *******tau	****** + *******tau	****** + *******tau	****** + *******tau	0.31	0	0	-999	-999	-999
16	corr2_fmatchedweak_nocloud	Terra	All	3	8	0	0	0.47	0.47	33/ 66/ 00	62/ 37/ 00	00/ 00/ 00	00/ 00/ 00	54/ 45/ 00	0.06	****** + *******tau	****** + *******tau	****** + *******tau	****** + *******tau	0.3	0	0	-999	-999	-999
16	corr2_fmatchedstrong	Terra	All	5	10	0	0	0.46	0.42	20/ 60/ 20	70/ 30/ 00	00/ 00/ 00	00/ 00/ 00	53/ 40/ 06	0.06	****** + *******tau	****** + *******tau	****** + *******tau	****** + *******tau	0.23	0	0	-999	-999	-999
16	corr2_fmatchedstrong_noclou	Terra	All	3	8	0	0	0.44	0.3	33/ 33/ 33	62/ 37/ 00	00/ 00/ 00	00/ 00/ 00	54/ 36/ 09	0.07	****** + *******tau	****** + *******tau	****** + *******tau	****** + *******tau	0.27	0	0	-999	-999	-999
16	raw_nobuddy	Aqua	All	21	96	16	0	0.86	0.47	14/ 76/ 09	09/ 56/ 34	31/ 25/ 43	00/ 00/ 00	12/ 55/ 31	0.14	0.01 + 0.31*tau	****** + *******tau	-0.04 + 0.42*tau	****** + *******tau	0.32	0	0	-999	-999	-999
16	raw_nosdcheck	Aqua	All	21	89	15	0	0.84	0.49	09/ 80/ 09	10/ 58/ 31	33/ 26/ 40	00/ 00/ 00	12/ 58/ 28	0.11	-0.02 + 0.39*tau	****** + *******tau	-0.02 + 0.39*tau	****** + *******tau	0.31	0	0	-999	-999	-999
16	raw	Aqua	All	21	80	11	0	0.83	0.49	09/ 85/ 04	08/ 56/ 35	36/ 18/ 45	00/ 00/ 00	11/ 58/ 30	0.12	0.01 + 0.27*tau	****** + *******tau	-0.04 + 0.43*tau	****** + *******tau	0.31	0	0	-999	-999	-999
16	raw_fqa	Aqua	All	11	14	3	0	0.91	0.71	18/ 81/ 00	00/ 78/ 21	66/ 00/ 33	00/ 00/ 00	14/ 71/ 14	0.08	****** + *******tau	****** + *******tau	****** + *******tau	****** + *******tau	0.27	0	0	-999	-999	-999
16	raw_fqa_nocloud	Aqua	All	8	6	3	0	0.89	0.7	37/ 62/ 00	00/100/ 00	33/ 33/ 33	00/ 00/ 00	23/ 70/ 05	0.07	****** + *******tau	****** + *******tau	****** + *******tau	****** + *******tau	0.3	0	0	-999	-999	-999
16	nocorr_fmatchedweak	Aqua	All	8	12	3	0	0.9	0.71	37/ 62/ 00	00/ 83/ 16	66/ 00/ 33	00/ 00/ 00	21/ 65/ 13	0.1	****** + *******tau	****** + *******tau	****** + *******tau	****** + *******tau	0.29	0	0	-999	-999	-999
16	nocorr_fmatchedweak_nocloud	Aqua	All	8	6	3	0	0.89	0.73	50/ 50/ 00	00/100/ 00	33/ 33/ 33	00/ 00/ 00	29/ 64/ 05	0.08	****** + *******tau	****** + *******tau	****** + *******tau	****** + *******tau	0.23	0	0	-999	-999	-999
16	nocorr_fmatchedstrong	Aqua	All	8	10	1	0	0.72	0.65	37/ 62/ 00	10/ 80/ 10	100/ 00/ 00	00/ 00/ 00	26/ 68/ 05	0.1	****** + *******tau	****** + *******tau	****** + *******tau	****** + *******tau	0.21	0	0	-999	-999	-999
16	nocorr_fmatchedstrong_noclo	Aqua	All	8	5	1	0	0.82	0.93	50/ 50/ 00	00/100/ 00	00/100/ 00	00/ 00/ 00	28/ 71/ 00	0.08	****** + *******tau	****** + *******tau	****** + *******tau	****** + *******tau	0.27	0	0	-999	-999	-999
16	nocorr_fclimweak	Aqua	All	5	7	2	0	0.88	0.37	40/ 60/ 00	00/ 85/ 14	50/ 00/ 50	00/ 00/ 00	21/ 64/ 14	0.08	****** + *******tau	****** + *******tau	****** + *******tau	****** + *******tau	0.27	0	0	-999	-999	-999
16	nocorr_fclimweak_nocloud	Aqua	All	4	5	2	0	0.87	0.38	50/ 50/ 00	00/100/ 00	50/ 00/ 50	00/ 00/ 00	27/ 63/ 09	0.09	****** + *******tau	****** + *******tau	****** + *******tau	****** + *******tau	0.27	0	0	-999	-999	-999
16	nocorr_fclimstrong	Aqua	All	4	3	0	0	0.53	0.45	50/ 50/ 00	33/ 66/ 00	00/ 00/ 00	00/ 00/ 00	42/ 57/ 00	0.08	****** + *******tau	****** + *******tau	****** + *******tau	****** + *******tau	0.28	0	0	-999	-999	-999
16	nocorr_fclimstrong_nocloud	Aqua	All	2	1	0	0	-999	-999	50/ 50/ 00	00/100/ 00	00/ 00/ 00	00/ 00/ 00	33/ 66/ 00	0.09	****** + *******tau	****** + *******tau	****** + *******tau	****** + *******tau	0.3	0	0	-999	-999	-999
16	albcorr_fmatchedweak	Aqua	All	6	15	3	0	0.93	0.72	00/100/ 00	00/ 66/ 33	66/ 00/ 33	00/ 00/ 00	08/ 66/ 25	0.1	****** + *******tau	****** + *******tau	****** + *******tau	****** + *******tau	0.24	0	0	-999	-999	-999
16	albcorr_fmatchedweak_noclou	Aqua	All	6	8	3	0	0.91	0.78	00/100/ 00	00/ 87/ 12	33/ 33/ 33	00/ 00/ 00	05/ 82/ 11	0.05	****** + *******tau	****** + *******tau	****** + *******tau	****** + *******tau	0.2	0	0	-999	-999	-999
16	albcorr_fmatchedstrong	Aqua	All	6	11	2	0	0.76	0.66	00/100/ 00	09/ 72/ 18	50/ 50/ 00	00/ 00/ 00	10/ 78/ 10	0.1	****** + *******tau	****** + *******tau	****** + *******tau	****** + *******tau	0.17	0	0	-999	-999	-999
16	albcorr_fmatchedstrong_nocl	Aqua	All	6	6	2	0	0.87	0.94	00/100/ 00	00/100/ 00	00/100/ 00	00/ 00/ 00	00/100/ 00	0.05	****** + *******tau	****** + *******tau	****** + *******tau	****** + *******tau	0.22	0	0	-999	-999	-999
16	albcorr_fclimweak	Aqua	All	5	7	2	0	0.92	0.33	00/100/ 00	00/ 71/ 28	50/ 00/ 50	00/ 00/ 00	07/ 71/ 21	0.04	****** + *******tau	****** + *******tau	****** + *******tau	****** + *******tau	0.17	0	0	-999	-999	-999
16	albcorr_fclimweak_nocloud	Aqua	All	4	5	2	0	0.9	0.34	25/ 75/ 00	00/100/ 00	50/ 00/ 50	00/ 00/ 00	18/ 72/ 09	0.04	****** + *******tau	****** + *******tau	****** + *******tau	****** + *******tau	0.18	0	0	-999	-999	-999
16	albcorr_fclimstrong	Aqua	All	4	3	0	0	0.57	0.31	25/ 75/ 00	33/ 66/ 00	00/ 00/ 00	00/ 00/ 00	28/ 71/ 00	0.04	****** + *******tau	****** + *******tau	****** + *******tau	****** + *******tau	0.19	0	0	-999	-999	-999
16	albcorr_fclimstrong_nocloud	Aqua	All	2	1	0	0	-999	-999	00/100/ 00	00/100/ 00	00/ 00/ 00	00/ 00/ 00	00/100/ 00	0.04	****** + *******tau	****** + *******tau	****** + *******tau	****** + *******tau	0.2	0	0	-999	-999	-999
16	corr1_fclimweak	Aqua	All	5	7	2	0	0.92	0.33	00/100/ 00	00/ 71/ 28	50/ 00/ 50	00/ 00/ 00	07/ 71/ 21	0.04	****** + *******tau	****** + *******tau	****** + *******tau	****** + *******tau	0.17	0	0	-999	-999	-999
16	corr1_fclimweak_nocloud	Aqua	All	4	5	2	0	0.9	0.34	25/ 75/ 00	00/100/ 00	50/ 00/ 50	00/ 00/ 00	18/ 72/ 09	0.04	****** + *******tau	****** + *******tau	****** + *******tau	****** + *******tau	0.18	0	0	-999	-999	-999
16	corr1_fclimstrong	Aqua	All	4	3	0	0	0.57	0.31	25/ 75/ 00	33/ 66/ 00	00/ 00/ 00	00/ 00/ 00	28/ 71/ 00	0.04	****** + *******tau	****** + *******tau	****** + *******tau	****** + *******tau	0.19	0	0	-999	-999	-999
16	corr1_fclimstrong_nocloud	Aqua	All	2	1	0	0	-999	-999	00/100/ 00	00/100/ 00	00/ 00/ 00	00/ 00/ 00	00/100/ 00	0.04	****** + *******tau	****** + *******tau	****** + *******tau	****** + *******tau	0.2	0	0	-999	-999	-999
16	corr2_fmatchedweak	Aqua	All	6	15	3	0	0.93	0.72	00/100/ 00	00/ 66/ 33	66/ 00/ 33	00/ 00/ 00	08/ 66/ 25	0.1	****** + *******tau	****** + *******tau	****** + *******tau	****** + *******tau	0.24	0	0	-999	-999	-999
16	corr2_fmatchedweak_nocloud	Aqua	All	6	8	3	0	0.91	0.78	00/100/ 00	00/ 87/ 12	33/ 33/ 33	00/ 00/ 00	05/ 82/ 11	0.05	****** + *******tau	****** + *******tau	****** + *******tau	****** + *******tau	0.2	0	0	-999	-999	-999
16	corr2_fmatchedstrong	Aqua	All	6	11	2	0	0.76	0.66	00/100/ 00	09/ 72/ 18	50/ 50/ 00	00/ 00/ 00	10/ 78/ 10	0.1	****** + *******tau	****** + *******tau	****** + *******tau	****** + *******tau	0.17	0	0	-999	-999	-999
16	corr2_fmatchedstrong_noclou	Aqua	All	6	6	2	0	0.87	0.94	00/100/ 00	00/100/ 00	00/100/ 00	00/ 00/ 00	00/100/ 00	0.05	****** + *******tau	****** + *******tau	****** + *******tau	****** + *******tau	0.22	0	0	-999	-999	-999
17	raw_nobuddy	Terra	All	2632	454	5	0	1.15	0.09	06/ 81/ 11	04/ 45/ 50	00/ 00/100	00/ 00/ 00	06/ 76/ 17	0.07	-0.00 + 0.34*tau	****** + *******tau	-0.02 + 0.50*tau	****** + *******tau	0.46	0.2	0.08	-999	-999	-999
17	raw_nosdcheck	Terra	All	2631	432	5	0	1.14	0.09	06/ 81/ 11	04/ 46/ 49	00/ 00/100	00/ 00/ 00	06/ 76/ 16	0.07	-0.02 + 0.41*tau	****** + *******tau	-0.04 + 0.54*tau	****** + *******tau	0.45	0.2	0.08	-999	-999	-999
17	raw	Terra	All	2497	374	5	0	1.11	0.11	05/ 83/ 10	05/ 50/ 43	00/ 00/100	00/ 00/ 00	05/ 78/ 15	0.06	-0.03 + 0.42*tau	****** + *******tau	-0.04 + 0.53*tau	****** + *******tau	0.47	0.18	0.03	-999	-999	-999
17	raw_fqa	Terra	All	1852	185	1	0	1.01	0.27	07/ 87/ 04	06/ 63/ 29	00/ 00/100	00/ 00/ 00	07/ 85/ 07	0.05	-0.04 + 0.46*tau	****** + *******tau	0.03 + 0.19*tau	****** + *******tau	0.46	0.21	0.06	-999	-999	-999
17	raw_fqa_nocloud	Terra	All	1770	162	0	0	0.99	0.29	07/ 88/ 04	06/ 67/ 25	00/ 00/ 00	00/ 00/ 00	07/ 86/ 05	0.04	-0.08 + 0.60*tau	****** + *******tau	0.03 + 0.17*tau	****** + *******tau	0.46	0.22	0.07	-999	-999	-999
17	nocorr_fmatchedweak	Terra	All	1817	179	1	0	1.01	0.26	07/ 87/ 04	06/ 67/ 26	00/ 00/100	00/ 00/ 00	07/ 86/ 06	0.05	-0.04 + 0.47*tau	****** + *******tau	0.01 + 0.25*tau	****** + *******tau	0.46	0.22	0.06	-999	-999	-999
17	nocorr_fmatchedweak_nocloud	Terra	All	1736	156	0	0	0.98	0.28	08/ 88/ 03	07/ 71/ 21	00/ 00/ 00	00/ 00/ 00	08/ 86/ 05	0.04	-0.08 + 0.60*tau	****** + *******tau	0.02 + 0.20*tau	****** + *******tau	0.46	0.22	0.07	-999	-999	-999
17	nocorr_fmatchedstrong	Terra	All	1076	45	1	0	0.96	0.19	10/ 88/ 01	06/ 73/ 20	00/ 00/100	00/ 00/ 00	10/ 87/ 02	0.05	0.02 + 0.27*tau	****** + *******tau	-0.13 + 0.73*tau	****** + *******tau	0.54	0.3	0.11	-999	-999	-999
17	nocorr_fmatchedstrong_noclo	Terra	All	993	31	0	0	0.85	0.53	11/ 87/ 01	09/ 87/ 03	00/ 00/ 00	00/ 00/ 00	11/ 87/ 01	0.04	-0.05 + 0.52*tau	****** + *******tau	-0.01 + 0.27*tau	****** + *******tau	0.54	0.32	0.13	-999	-999	-999
17	nocorr_fclimweak	Terra	All	1793	154	1	0	0.99	0.28	07/ 89/ 02	06/ 67/ 25	00/ 00/100	00/ 00/ 00	07/ 87/ 04	0.04	-0.04 + 0.47*tau	****** + *******tau	0.02 + 0.22*tau	****** + *******tau	0.46	0.24	0.07	-999	-999	-999
17	nocorr_fclimweak_nocloud	Terra	All	1705	131	0	0	0.96	0.3	08/ 89/ 01	06/ 73/ 19	00/ 00/ 00	00/ 00/ 00	08/ 88/ 02	0.04	-0.05 + 0.51*tau	****** + *******tau	0.02 + 0.21*tau	****** + *******tau	0.47	0.25	0.08	-999	-999	-999
17	nocorr_fclimstrong	Terra	All	930	39	1	0	0.94	0.43	12/ 86/ 01	02/ 84/ 12	00/ 00/100	00/ 00/ 00	11/ 86/ 01	0.04	-0.06 + 0.58*tau	****** + *******tau	-0.01 + 0.28*tau	****** + *******tau	0.59	0.31	0.11	-999	-999	-999
17	nocorr_fclimstrong_nocloud	Terra	All	858	29	0	0	0.88	0.66	13/ 85/ 00	03/ 93/ 03	00/ 00/ 00	00/ 00/ 00	13/ 85/ 01	0.05	-0.05 + 0.54*tau	****** + *******tau	****** + *******tau	****** + *******tau	0.57	0.32	0.13	-999	-999	-999
17	albcorr_fmatchedweak	Terra	All	1870	129	1	0	0.91	0.21	06/ 90/ 02	10/ 68/ 20	00/ 00/100	00/ 00/ 00	07/ 89/ 03	0.04	-0.07 + 0.60*tau	****** + *******tau	0.03 + 0.19*tau	****** + *******tau	0.49	0.28	0.18	-999	-999	-999
17	albcorr_fmatchedweak_noclou	Terra	All	1790	108	0	0	0.88	0.29	07/ 91/ 01	10/ 74/ 15	00/ 00/ 00	00/ 00/ 00	07/ 90/ 02	0.04	-0.08 + 0.63*tau	****** + *******tau	0.03 + 0.17*tau	****** + *******tau	0.5	0.29	0.19	-999	-999	-999
17	albcorr_fmatchedstrong	Terra	All	1063	66	1	0	0.98	0.24	03/ 93/ 02	06/ 72/ 21	00/ 00/100	00/ 00/ 00	03/ 92/ 03	0.04	-0.04 + 0.44*tau	****** + *******tau	0.00 + 0.29*tau	****** + *******tau	0.34	0.08	0.02	-999	-999	-999
17	albcorr_fmatchedstrong_nocl	Terra	All	983	48	0	0	0.9	0.47	04/ 93/ 02	06/ 81/ 12	00/ 00/ 00	00/ 00/ 00	04/ 93/ 02	0.03	-0.09 + 0.61*tau	****** + *******tau	0.07 + -0.02*tau	****** + *******tau	0.33	0.08	0.02	-999	-999	-999
17	albcorr_fclimweak	Terra	All	1802	156	1	0	0.93	0.23	04/ 93/ 02	09/ 68/ 21	00/ 00/100	00/ 00/ 00	04/ 91/ 04	0.04	-0.07 + 0.56*tau	****** + *******tau	0.04 + 0.14*tau	****** + *******tau	0.38	0.2	0.12	-999	-999	-999
17	albcorr_fclimweak_nocloud	Terra	All	1724	125	0	0	0.89	0.24	04/ 93/ 02	11/ 72/ 16	00/ 00/ 00	00/ 00/ 00	04/ 91/ 03	0.04	-0.09 + 0.61*tau	****** + *******tau	0.05 + 0.11*tau	****** + *******tau	0.38	0.21	0.14	-999	-999	-999
17	albcorr_fclimstrong	Terra	All	910	61	1	0	0.97	0.31	02/ 93/ 03	06/ 72/ 21	00/ 00/100	00/ 00/ 00	02/ 92/ 04	0.04	0.02 + 0.19*tau	****** + *******tau	0.01 + 0.25*tau	****** + *******tau	0.28	0.03	0	-999	-999	-999
17	albcorr_fclimstrong_nocloud	Terra	All	838	50	0	0	0.9	0.41	02/ 94/ 02	08/ 78/ 14	00/ 00/ 00	00/ 00/ 00	03/ 93/ 03	0.03	-0.08 + 0.54*tau	****** + *******tau	0.06 + 0.01*tau	****** + *******tau	0.27	0.03	0.01	-999	-999	-999
17	corr1_fclimweak	Terra	All	1802	156	1	0	0.93	0.23	04/ 93/ 02	09/ 68/ 21	00/ 00/100	00/ 00/ 00	04/ 91/ 04	0.04	-0.07 + 0.56*tau	****** + *******tau	0.04 + 0.14*tau	****** + *******tau	0.38	0.2	0.12	-999	-999	-999
17	corr1_fclimweak_nocloud	Terra	All	1724	125	0	0	0.89	0.24	04/ 93/ 02	11/ 72/ 16	00/ 00/ 00	00/ 00/ 00	04/ 91/ 03	0.04	-0.09 + 0.61*tau	****** + *******tau	0.05 + 0.11*tau	****** + *******tau	0.38	0.21	0.14	-999	-999	-999
17	corr1_fclimstrong	Terra	All	910	61	1	0	0.97	0.31	02/ 93/ 03	06/ 72/ 21	00/ 00/100	00/ 00/ 00	02/ 92/ 04	0.04	0.02 + 0.19*tau	****** + *******tau	0.01 + 0.25*tau	****** + *******tau	0.28	0.03	0	-999	-999	-999
17	corr1_fclimstrong_nocloud	Terra	All	838	50	0	0	0.9	0.41	02/ 94/ 02	08/ 78/ 14	00/ 00/ 00	00/ 00/ 00	03/ 93/ 03	0.03	-0.08 + 0.54*tau	****** + *******tau	0.06 + 0.01*tau	****** + *******tau	0.27	0.03	0.01	-999	-999	-999
17	corr2_fmatchedweak	Terra	All	1870	129	1	0	0.91	0.21	06/ 90/ 02	10/ 68/ 20	00/ 00/100	00/ 00/ 00	07/ 89/ 03	0.04	-0.07 + 0.60*tau	****** + *******tau	0.03 + 0.19*tau	****** + *******tau	0.49	0.28	0.18	-999	-999	-999
17	corr2_fmatchedweak_nocloud	Terra	All	1790	108	0	0	0.88	0.29	07/ 91/ 01	10/ 74/ 15	00/ 00/ 00	00/ 00/ 00	07/ 90/ 02	0.04	-0.08 + 0.63*tau	****** + *******tau	0.03 + 0.17*tau	****** + *******tau	0.5	0.29	0.19	-999	-999	-999
17	corr2_fmatchedstrong	Terra	All	1063	66	1	0	0.98	0.24	03/ 93/ 02	06/ 72/ 21	00/ 00/100	00/ 00/ 00	03/ 92/ 03	0.04	-0.04 + 0.44*tau	****** + *******tau	0.00 + 0.29*tau	****** + *******tau	0.34	0.08	0.02	-999	-999	-999
17	corr2_fmatchedstrong_noclou	Terra	All	983	48	0	0	0.9	0.47	04/ 93/ 02	06/ 81/ 12	00/ 00/ 00	00/ 00/ 00	04/ 93/ 02	0.03	-0.09 + 0.61*tau	****** + *******tau	0.07 + -0.02*tau	****** + *******tau	0.33	0.08	0.02	-999	-999	-999
17	raw_nobuddy	Aqua	All	2459	540	12	0	1.34	0.11	04/ 82/ 12	02/ 32/ 64	00/ 08/ 91	00/ 00/ 00	04/ 73/ 22	0.08	0.02 + 0.36*tau	****** + *******tau	-0.03 + 0.56*tau	****** + *******tau	0.72	0.34	0.21	-999	-999	-999
17	raw_nosdcheck	Aqua	All	2446	522	11	0	1.33	0.11	04/ 82/ 12	02/ 33/ 63	00/ 09/ 90	00/ 00/ 00	04/ 73/ 21	0.08	0.03 + 0.30*tau	****** + *******tau	-0.03 + 0.56*tau	****** + *******tau	0.71	0.35	0.21	-999	-999	-999
17	raw	Aqua	All	2340	475	10	0	1.32	0.11	04/ 83/ 11	03/ 34/ 62	00/ 10/ 90	00/ 00/ 00	04/ 75/ 20	0.07	0.02 + 0.35*tau	****** + *******tau	-0.05 + 0.60*tau	****** + *******tau	0.69	0.32	0.15	-999	-999	-999
17	raw_fqa	Aqua	All	1624	196	4	0	1.23	0.16	06/ 88/ 05	04/ 40/ 55	00/ 25/ 75	00/ 00/ 00	05/ 83/ 10	0.05	-0.00 + 0.42*tau	****** + *******tau	-0.02 + 0.48*tau	****** + *******tau	0.73	0.35	0.23	-999	-999	-999
17	raw_fqa_nocloud	Aqua	All	1522	143	2	0	1.13	0.13	07/ 88/ 04	04/ 46/ 48	00/ 50/ 50	00/ 00/ 00	06/ 84/ 08	0.05	-0.01 + 0.42*tau	****** + *******tau	-0.00 + 0.40*tau	****** + *******tau	0.83	0.44	0.3	-999	-999	-999
17	nocorr_fmatchedweak	Aqua	All	1604	189	4	0	1.22	0.16	06/ 88/ 05	04/ 40/ 55	00/ 25/ 75	00/ 00/ 00	06/ 82/ 11	0.05	0.02 + 0.35*tau	****** + *******tau	-0.01 + 0.43*tau	****** + *******tau	0.85	0.38	0.23	-999	-999	-999
17	nocorr_fmatchedweak_nocloud	Aqua	All	1499	140	2	0	1.12	0.13	07/ 88/ 04	05/ 47/ 47	00/ 50/ 50	00/ 00/ 00	06/ 84/ 08	0.05	-0.01 + 0.42*tau	****** + *******tau	-0.01 + 0.43*tau	****** + *******tau	0.96	0.48	0.31	-999	-999	-999
17	nocorr_fmatchedstrong	Aqua	All	958	54	0	0	1.02	0.05	08/ 89/ 02	07/ 61/ 31	00/ 00/ 00	00/ 00/ 00	08/ 87/ 03	0.05	-0.02 + 0.47*tau	****** + *******tau	-0.00 + 0.39*tau	****** + *******tau	1.07	0.54	0.36	-999	-999	-999
17	nocorr_fmatchedstrong_noclo	Aqua	All	857	34	0	0	0.91	0.01	10/ 89/ 00	11/ 67/ 20	00/ 00/ 00	00/ 00/ 00	10/ 88/ 01	0.04	-0.01 + 0.39*tau	****** + *******tau	0.03 + 0.22*tau	****** + *******tau	1.41	0.59	0.39	-999	-999	-999
17	nocorr_fclimweak	Aqua	All	1587	145	3	0	1.18	0.14	06/ 89/ 03	04/ 49/ 46	00/ 33/ 66	00/ 00/ 00	06/ 86/ 07	0.05	-0.01 + 0.44*tau	****** + *******tau	-0.03 + 0.48*tau	****** + *******tau	0.73	0.35	0.26	-999	-999	-999
17	nocorr_fclimweak_nocloud	Aqua	All	1477	105	1	0	1.06	0.14	07/ 89/ 02	05/ 55/ 39	00/100/ 00	00/ 00/ 00	07/ 87/ 04	0.05	-0.08 + 0.66*tau	****** + *******tau	0.01 + 0.31*tau	****** + *******tau	0.87	0.44	0.31	-999	-999	-999
17	nocorr_fclimstrong	Aqua	All	811	38	0	0	0.98	0	09/ 88/ 01	10/ 65/ 23	00/ 00/ 00	00/ 00/ 00	09/ 87/ 02	0.04	0.03 + 0.32*tau	****** + *******tau	-0.00 + 0.35*tau	****** + *******tau	1.06	0.5	0.34	-999	-999	-999
17	nocorr_fclimstrong_nocloud	Aqua	All	714	28	0	0	0.88	0.03	10/ 87/ 01	14/ 75/ 10	00/ 00/ 00	00/ 00/ 00	11/ 87/ 01	0.04	-0.11 + 0.77*tau	****** + *******tau	0.10 + -0.11*tau	****** + *******tau	1.08	0.57	0.37	-999	-999	-999
17	albcorr_fmatchedweak	Aqua	All	1628	165	4	0	1.16	0.15	05/ 90/ 03	05/ 49/ 45	00/ 25/ 75	00/ 00/ 00	05/ 86/ 07	0.05	-0.02 + 0.46*tau	****** + *******tau	-0.02 + 0.45*tau	****** + *******tau	0.65	0.36	0.22	-999	-999	-999
17	albcorr_fmatchedweak_noclou	Aqua	All	1521	116	2	0	1.04	0.13	06/ 90/ 02	07/ 56/ 35	00/ 50/ 50	00/ 00/ 00	06/ 88/ 05	0.04	-0.04 + 0.53*tau	****** + *******tau	-0.01 + 0.38*tau	****** + *******tau	0.81	0.4	0.26	-999	-999	-999
17	albcorr_fmatchedstrong	Aqua	All	939	73	0	0	1.08	0.11	03/ 91/ 04	05/ 58/ 35	00/ 00/ 00	00/ 00/ 00	03/ 89/ 06	0.04	-0.03 + 0.46*tau	****** + *******tau	-0.03 + 0.45*tau	****** + *******tau	0.62	0.26	0.13	-999	-999	-999
17	albcorr_fmatchedstrong_nocl	Aqua	All	840	51	0	0	0.99	0.09	03/ 92/ 03	05/ 68/ 25	00/ 00/ 00	00/ 00/ 00	04/ 91/ 04	0.04	-0.02 + 0.36*tau	****** + *******tau	-0.01 + 0.34*tau	****** + *******tau	0.72	0.3	0.12	-999	-999	-999
17	albcorr_fclimweak	Aqua	All	1580	154	4	0	1.16	0.17	03/ 90/ 05	04/ 52/ 42	00/ 50/ 50	00/ 00/ 00	03/ 86/ 09	0.05	-0.02 + 0.47*tau	****** + *******tau	-0.03 + 0.47*tau	****** + *******tau	0.5	0.22	0.12	-999	-999	-999
17	albcorr_fclimweak_nocloud	Aqua	All	1475	111	1	0	1.03	0.15	04/ 90/ 04	07/ 63/ 29	00/100/ 00	00/ 00/ 00	04/ 88/ 06	0.04	-0.07 + 0.62*tau	****** + *******tau	-0.03 + 0.43*tau	****** + *******tau	0.61	0.28	0.14	-999	-999	-999
17	albcorr_fclimstrong	Aqua	All	786	64	1	0	1.06	0.05	02/ 91/ 05	07/ 57/ 34	00/ 00/100	00/ 00/ 00	02/ 89/ 07	0.04	0.09 + 0.04*tau	****** + *******tau	0.01 + 0.31*tau	****** + *******tau	0.46	0.18	0.01	-999	-999	-999
17	albcorr_fclimstrong_nocloud	Aqua	All	697	48	0	0	0.97	0.15	02/ 93/ 04	08/ 62/ 29	00/ 00/ 00	00/ 00/ 00	02/ 91/ 05	0.04	-0.06 + 0.52*tau	****** + *******tau	0.02 + 0.21*tau	****** + *******tau	0.49	0.2	0.02	-999	-999	-999
17	corr1_fclimweak	Aqua	All	1580	154	4	0	1.16	0.17	03/ 90/ 05	04/ 52/ 42	00/ 50/ 50	00/ 00/ 00	03/ 86/ 09	0.05	-0.02 + 0.47*tau	****** + *******tau	-0.03 + 0.47*tau	****** + *******tau	0.5	0.22	0.12	-999	-999	-999
17	corr1_fclimweak_nocloud	Aqua	All	1475	111	1	0	1.03	0.15	04/ 90/ 04	07/ 63/ 29	00/100/ 00	00/ 00/ 00	04/ 88/ 06	0.04	-0.07 + 0.62*tau	****** + *******tau	-0.03 + 0.43*tau	****** + *******tau	0.61	0.28	0.14	-999	-999	-999
17	corr1_fclimstrong	Aqua	All	786	64	1	0	1.06	0.05	02/ 91/ 05	07/ 57/ 34	00/ 00/100	00/ 00/ 00	02/ 89/ 07	0.04	0.09 + 0.04*tau	****** + *******tau	0.01 + 0.31*tau	****** + *******tau	0.46	0.18	0.01	-999	-999	-999
17	corr1_fclimstrong_nocloud	Aqua	All	697	48	0	0	0.97	0.15	02/ 93/ 04	08/ 62/ 29	00/ 00/ 00	00/ 00/ 00	02/ 91/ 05	0.04	-0.06 + 0.52*tau	****** + *******tau	0.02 + 0.21*tau	****** + *******tau	0.49	0.2	0.02	-999	-999	-999
17	corr2_fmatchedweak	Aqua	All	1628	165	4	0	1.16	0.15	05/ 90/ 03	05/ 49/ 45	00/ 25/ 75	00/ 00/ 00	05/ 86/ 07	0.05	-0.02 + 0.46*tau	****** + *******tau	-0.02 + 0.45*tau	****** + *******tau	0.65	0.36	0.22	-999	-999	-999
17	corr2_fmatchedweak_nocloud	Aqua	All	1521	116	2	0	1.04	0.13	06/ 90/ 02	07/ 56/ 35	00/ 50/ 50	00/ 00/ 00	06/ 88/ 05	0.04	-0.04 + 0.53*tau	****** + *******tau	-0.01 + 0.38*tau	****** + *******tau	0.81	0.4	0.26	-999	-999	-999
17	corr2_fmatchedstrong	Aqua	All	939	73	0	0	1.08	0.11	03/ 91/ 04	05/ 58/ 35	00/ 00/ 00	00/ 00/ 00	03/ 89/ 06	0.04	-0.03 + 0.46*tau	****** + *******tau	-0.03 + 0.45*tau	****** + *******tau	0.62	0.26	0.13	-999	-999	-999
17	corr2_fmatchedstrong_noclou	Aqua	All	840	51	0	0	0.99	0.09	03/ 92/ 03	05/ 68/ 25	00/ 00/ 00	00/ 00/ 00	04/ 91/ 04	0.04	-0.02 + 0.36*tau	****** + *******tau	-0.01 + 0.34*tau	****** + *******tau	0.72	0.3	0.12	-999	-999	-999

## Sheet: 0c_20100520
															RMSE Error Model
				Count						Compliance						Diagnostic		Prognostic		MCV
Region	Scenario	Satellite	QA	<0.2	0.2-0.6	0.6-1.4	>1.4	Slope	R2	<0.2	0.2-0.6	0.6-1.4	>1.4	All	Floor	0.2-1.4	>1.4	0.2-1.4	>1.4	Median	%>1.0	%>2.0	RMSE_HIGH	RMSE_HIGH	RMSE_HIGH
-1	raw_nobuddy	Terra	All	44724	24012	4164	534	0.96	0.51	12/ 75/ 12	08/ 52/ 39	09/ 51/ 39	06/ 46/ 47	10/ 66/ 23	0.105	0.03 + 0.23*tau	-0.06 + 0.32*tau	0.04 + 0.24*tau	-0.33 + 0.43*tau	-1	-1	-1	0.697	0.521	0.567
-1	raw_nosdcheck	Terra	All	44497	23436	4056	529	0.96	0.52	12/ 75/ 12	08/ 53/ 38	09/ 52/ 38	06/ 46/ 47	10/ 66/ 22	0.103	0.03 + 0.23*tau	-0.03 + 0.30*tau	0.04 + 0.24*tau	-0.27 + 0.40*tau	-1	-1	-1	0.696	0.512	0.554
-1	raw	Terra	All	42272	21989	3764	500	0.95	0.53	11/ 76/ 12	08/ 54/ 36	09/ 53/ 36	06/ 47/ 46	10/ 68/ 21	0.1	0.03 + 0.24*tau	-0.05 + 0.30*tau	0.04 + 0.23*tau	-0.16 + 0.34*tau	-1	-1	-1	0.667	0.497	0.525
-1	raw_fqa	Terra	All	31408	11508	2160	301	0.93	0.58	13/ 79/ 07	10/ 64/ 25	09/ 59/ 31	09/ 46/ 43	12/ 74/ 13	0.076	0.02 + 0.24*tau	-0.11 + 0.32*tau	0.03 + 0.21*tau	-0.23 + 0.37*tau	-1	-1	-1	0.656	0.446	0.505
-1	raw_fqa_nocloud	Terra	All	29623	10093	1952	275	0.92	0.59	15/ 78/ 06	10/ 66/ 22	10/ 59/ 29	09/ 46/ 44	13/ 74/ 11	0.074	0.02 + 0.24*tau	-0.12 + 0.32*tau	0.03 + 0.21*tau	-0.22 + 0.37*tau	-1	-1	-1	0.673	0.441	0.509
-1	nocorr_fmatchedweak	Terra	All	29693	10738	1948	270	0.92	0.59	14/ 79/ 06	11/ 65/ 23	10/ 60/ 29	08/ 48/ 42	13/ 74/ 12	0.072	0.02 + 0.24*tau	-0.15 + 0.34*tau	0.03 + 0.21*tau	-0.23 + 0.38*tau	-1	-1	-1	0.667	0.442	0.508
-1	nocorr_fmatchedweak_nocloud	Terra	All	28033	9400	1745	249	0.91	0.6	15/ 78/ 05	11/ 67/ 20	10/ 60/ 28	08/ 47/ 43	14/ 75/ 10	0.069	0.02 + 0.24*tau	-0.23 + 0.39*tau	0.03 + 0.20*tau	-0.38 + 0.45*tau	-1	-1	-1	0.696	0.434	0.524
-1	nocorr_fmatchedstrong	Terra	All	23149	6619	994	134	0.86	0.6	17/ 79/ 03	13/ 71/ 15	13/ 64/ 21	14/ 47/ 37	16/ 77/ 06	0.059	0.01 + 0.26*tau	-0.11 + 0.33*tau	0.03 + 0.20*tau	-0.36 + 0.42*tau	-1	-1	-1	0.647	0.433	0.5
-1	nocorr_fmatchedstrong_noclo	Terra	All	21475	5600	860	117	0.85	0.61	19/ 78/ 02	14/ 73/ 11	14/ 66/ 19	15/ 48/ 35	17/ 77/ 05	0.057	0.01 + 0.26*tau	-0.10 + 0.34*tau	0.02 + 0.21*tau	-0.27 + 0.38*tau	-1	-1	-1	0.669	0.448	0.503
-1	nocorr_fclimweak	Terra	All	29418	10346	1813	256	0.91	0.59	14/ 79/ 05	11/ 66/ 22	10/ 62/ 27	09/ 47/ 42	13/ 75/ 11	0.07	0.02 + 0.24*tau	-0.22 + 0.37*tau	0.03 + 0.20*tau	-0.30 + 0.40*tau	-1	-1	-1	0.634	0.428	0.491
-1	nocorr_fclimweak_nocloud	Terra	All	27608	8987	1613	227	0.9	0.6	15/ 79/ 05	11/ 68/ 19	11/ 63/ 25	07/ 47/ 44	14/ 75/ 09	0.067	0.02 + 0.24*tau	-0.16 + 0.34*tau	0.03 + 0.19*tau	-0.34 + 0.42*tau	-1	-1	-1	0.655	0.416	0.498
-1	nocorr_fclimstrong	Terra	All	20216	5340	705	91	0.87	0.58	19/ 78/ 02	12/ 73/ 14	14/ 63/ 21	10/ 53/ 35	17/ 76/ 05	0.06	0.01 + 0.27*tau	-0.04 + 0.27*tau	0.02 + 0.21*tau	-0.33 + 0.40*tau	-1	-1	-1	0.698	0.434	0.486
-1	nocorr_fclimstrong_nocloud	Terra	All	18558	4478	603	79	0.85	0.6	20/ 77/ 01	14/ 75/ 10	15/ 66/ 18	10/ 51/ 37	19/ 76/ 04	0.059	0.01 + 0.28*tau	****** + *******tau	0.03 + 0.20*tau	****** + *******tau	-1	-1	-1	0.73	0.428	0.428
-1	albcorr_fmatchedweak	Terra	All	29439	11070	1948	270	0.92	0.6	09/ 83/ 07	10/ 67/ 22	10/ 60/ 29	08/ 48/ 42	09/ 77/ 12	0.067	0.01 + 0.25*tau	-0.15 + 0.34*tau	0.03 + 0.22*tau	-0.23 + 0.38*tau	-1	-1	-1	0.667	0.448	0.509
-1	albcorr_fmatchedweak_noclou	Terra	All	27887	9637	1748	249	0.91	0.61	10/ 83/ 06	10/ 70/ 19	10/ 60/ 28	08/ 47/ 43	10/ 79/ 10	0.062	0.01 + 0.25*tau	-0.23 + 0.39*tau	0.03 + 0.21*tau	-0.38 + 0.45*tau	-1	-1	-1	0.696	0.442	0.526
-1	albcorr_fmatchedstrong	Terra	All	21955	7886	1000	134	0.89	0.62	08/ 85/ 06	09/ 71/ 19	13/ 65/ 21	14/ 47/ 37	08/ 81/ 09	0.056	0.00 + 0.26*tau	-0.11 + 0.33*tau	0.02 + 0.21*tau	-0.36 + 0.42*tau	-1	-1	-1	0.647	0.449	0.505
-1	albcorr_fmatchedstrong_nocl	Terra	All	20482	6656	867	117	0.87	0.63	08/ 86/ 04	10/ 74/ 15	14/ 66/ 19	15/ 48/ 35	09/ 82/ 07	0.051	-0.00 + 0.27*tau	-0.11 + 0.34*tau	0.02 + 0.22*tau	-0.27 + 0.38*tau	-1	-1	-1	0.669	0.462	0.507
-1	albcorr_fclimweak	Terra	All	28358	11452	1873	252	0.93	0.61	07/ 83/ 08	09/ 67/ 23	09/ 62/ 28	09/ 48/ 42	08/ 78/ 13	0.067	0.01 + 0.24*tau	-0.23 + 0.38*tau	0.03 + 0.21*tau	-0.59 + 0.56*tau	-1	-1	-1	0.644	0.433	0.535
-1	albcorr_fclimweak_nocloud	Terra	All	26789	9877	1645	225	0.92	0.63	08/ 84/ 06	09/ 70/ 19	10/ 63/ 26	08/ 46/ 44	08/ 79/ 11	0.062	0.01 + 0.24*tau	-0.11 + 0.32*tau	0.03 + 0.20*tau	-0.37 + 0.44*tau	-1	-1	-1	0.663	0.421	0.505
-1	albcorr_fclimstrong	Terra	All	18801	6722	795	94	0.92	0.6	07/ 86/ 06	08/ 71/ 20	11/ 61/ 26	10/ 54/ 35	07/ 81/ 10	0.057	-0.00 + 0.27*tau	-0.03 + 0.27*tau	0.02 + 0.21*tau	-0.46 + 0.47*tau	-1	-1	-1	0.7	0.443	0.515
-1	albcorr_fclimstrong_nocloud	Terra	All	17346	5655	681	84	0.9	0.62	07/ 87/ 05	09/ 74/ 15	12/ 64/ 23	10/ 51/ 38	08/ 83/ 08	0.051	-0.01 + 0.28*tau	****** + *******tau	0.02 + 0.21*tau	****** + *******tau	-1	-1	-1	0.723	0.444	0.444
-1	corr1_fclimweak	Terra	All	28789	11064	1910	205	0.92	0.63	07/ 83/ 08	09/ 69/ 21	10/ 62/ 27	15/ 50/ 33	08/ 78/ 12	0.063	0.01 + 0.23*tau	-0.41 + 0.47*tau	0.03 + 0.20*tau	-0.20 + 0.35*tau	-1	-1	-1	0.602	0.411	0.466
-1	corr1_fclimweak_nocloud	Terra	All	27124	9569	1690	181	0.91	0.64	08/ 84/ 07	10/ 71/ 17	11/ 63/ 25	15/ 49/ 34	09/ 80/ 10	0.058	0.01 + 0.23*tau	-0.27 + 0.40*tau	0.03 + 0.19*tau	-0.28 + 0.40*tau	-1	-1	-1	0.629	0.396	0.484
-1	corr1_fclimstrong	Terra	All	19035	6542	767	81	0.91	0.61	07/ 86/ 06	08/ 73/ 17	12/ 63/ 23	16/ 61/ 22	07/ 82/ 09	0.055	0.00 + 0.26*tau	-0.38 + 0.46*tau	0.02 + 0.22*tau	****** + *******tau	-1	-1	-1	0.601	0.416	0.416
-1	corr1_fclimstrong_nocloud	Terra	All	17537	5506	665	72	0.89	0.63	07/ 87/ 05	09/ 76/ 14	13/ 66/ 20	16/ 58/ 25	08/ 83/ 07	0.05	-0.00 + 0.27*tau	****** + *******tau	0.01 + 0.21*tau	****** + *******tau	-1	-1	-1	0.624	0.413	0.413
-1	corr2_fmatchedweak	Terra	All	29805	10762	1974	222	0.91	0.61	09/ 83/ 07	10/ 69/ 19	10/ 59/ 29	14/ 54/ 31	10/ 78/ 11	0.063	0.01 + 0.24*tau	-0.35 + 0.44*tau	0.02 + 0.22*tau	-0.28 + 0.41*tau	-1	-1	-1	0.626	0.427	0.485
-1	corr2_fmatchedweak_nocloud	Terra	All	28181	9382	1787	201	0.9	0.62	10/ 83/ 06	11/ 71/ 17	11/ 60/ 27	14/ 51/ 33	10/ 79/ 09	0.059	0.01 + 0.24*tau	-0.40 + 0.48*tau	0.02 + 0.21*tau	-0.25 + 0.39*tau	-1	-1	-1	0.655	0.428	0.495
-1	corr2_fmatchedstrong	Terra	All	22201	7674	1012	106	0.87	0.63	08/ 85/ 06	10/ 72/ 16	13/ 65/ 20	20/ 51/ 27	09/ 81/ 09	0.054	0.00 + 0.26*tau	-0.34 + 0.45*tau	0.02 + 0.21*tau	-0.17 + 0.34*tau	-1	-1	-1	0.622	0.419	0.475
-1	corr2_fmatchedstrong_noclou	Terra	All	20687	6484	883	92	0.85	0.64	08/ 86/ 04	11/ 75/ 13	14/ 68/ 17	20/ 52/ 27	09/ 82/ 07	0.05	0.00 + 0.26*tau	-0.33 + 0.45*tau	0.02 + 0.22*tau	-0.55 + 0.56*tau	-1	-1	-1	0.632	0.428	0.524
-1	raw_nobuddy	Aqua	All	39788	24723	4323	480	0.99	0.51	10/ 76/ 13	06/ 48/ 44	08/ 47/ 44	05/ 41/ 53	08/ 64/ 26	0.111	0.03 + 0.24*tau	0.09 + 0.23*tau	0.04 + 0.25*tau	-0.09 + 0.31*tau	-1	-1	-1	0.664	0.542	0.55
-1	raw_nosdcheck	Aqua	All	39480	23994	4196	477	0.99	0.51	10/ 76/ 13	07/ 48/ 43	08/ 48/ 43	05/ 41/ 53	09/ 64/ 26	0.109	0.03 + 0.24*tau	0.08 + 0.23*tau	0.04 + 0.25*tau	-0.13 + 0.34*tau	-1	-1	-1	0.664	0.538	0.552
-1	raw	Aqua	All	37454	22340	3853	444	0.98	0.52	09/ 77/ 12	07/ 50/ 42	08/ 49/ 42	04/ 43/ 51	08/ 66/ 25	0.105	0.03 + 0.24*tau	0.12 + 0.20*tau	0.04 + 0.24*tau	-0.17 + 0.35*tau	-1	-1	-1	0.645	0.521	0.54
-1	raw_fqa	Aqua	All	26388	10588	1901	244	0.95	0.57	12/ 80/ 07	08/ 62/ 29	09/ 55/ 35	05/ 49/ 45	11/ 74/ 14	0.077	0.02 + 0.25*tau	-0.23 + 0.37*tau	0.03 + 0.23*tau	-0.24 + 0.37*tau	-1	-1	-1	0.635	0.466	0.503
-1	raw_fqa_nocloud	Aqua	All	24537	9112	1678	212	0.94	0.58	13/ 80/ 06	09/ 64/ 26	09/ 56/ 34	05/ 50/ 44	12/ 74/ 12	0.074	0.02 + 0.25*tau	-0.23 + 0.36*tau	0.03 + 0.22*tau	-0.02 + 0.25*tau	-1	-1	-1	0.633	0.457	0.468
-1	nocorr_fmatchedweak	Aqua	All	25040	9974	1679	216	0.94	0.58	12/ 80/ 06	09/ 63/ 27	10/ 56/ 32	04/ 50/ 44	11/ 74/ 13	0.073	0.01 + 0.26*tau	-0.32 + 0.42*tau	0.03 + 0.22*tau	-0.20 + 0.35*tau	-1	-1	-1	0.628	0.451	0.486
-1	nocorr_fmatchedweak_nocloud	Aqua	All	23266	8587	1468	187	0.93	0.59	13/ 80/ 05	10/ 65/ 24	10/ 57/ 32	05/ 51/ 43	12/ 75/ 11	0.07	0.01 + 0.26*tau	-0.21 + 0.35*tau	0.03 + 0.22*tau	-0.16 + 0.32*tau	-1	-1	-1	0.623	0.446	0.475
-1	nocorr_fmatchedstrong	Aqua	All	19553	6065	820	97	0.89	0.59	15/ 81/ 03	11/ 71/ 17	13/ 61/ 24	06/ 55/ 38	14/ 78/ 07	0.058	0.01 + 0.27*tau	-0.30 + 0.46*tau	0.02 + 0.21*tau	-0.63 + 0.56*tau	-1	-1	-1	0.679	0.441	0.54
-1	nocorr_fmatchedstrong_noclo	Aqua	All	17902	5025	682	80	0.87	0.61	16/ 81/ 02	12/ 74/ 13	13/ 64/ 22	07/ 58/ 33	15/ 79/ 05	0.057	0.01 + 0.26*tau	-0.21 + 0.40*tau	0.02 + 0.20*tau	****** + *******tau	-1	-1	-1	0.661	0.434	0.434
-1	nocorr_fclimweak	Aqua	All	24912	9511	1522	200	0.93	0.58	12/ 81/ 06	09/ 64/ 25	10/ 58/ 30	04/ 50/ 46	11/ 75/ 12	0.071	0.01 + 0.26*tau	-0.07 + 0.28*tau	0.03 + 0.22*tau	-0.19 + 0.35*tau	-1	-1	-1	0.622	0.439	0.479
-1	nocorr_fclimweak_nocloud	Aqua	All	23035	8119	1332	170	0.92	0.6	14/ 80/ 05	10/ 66/ 22	10/ 58/ 30	04/ 54/ 41	13/ 76/ 10	0.068	0.01 + 0.26*tau	0.00 + 0.22*tau	0.03 + 0.21*tau	-0.15 + 0.32*tau	-1	-1	-1	0.61	0.425	0.458
-1	nocorr_fclimstrong	Aqua	All	17129	4730	570	54	0.89	0.58	16/ 80/ 02	11/ 73/ 15	12/ 61/ 25	07/ 50/ 42	15/ 78/ 06	0.057	0.00 + 0.28*tau	****** + *******tau	0.02 + 0.22*tau	****** + *******tau	-1	-1	-1	0.643	0.442	0.442
-1	nocorr_fclimstrong_nocloud	Aqua	All	15473	3866	447	48	0.87	0.62	18/ 80/ 01	12/ 76/ 11	13/ 63/ 22	08/ 50/ 41	16/ 78/ 04	0.056	0.01 + 0.27*tau	****** + *******tau	0.02 + 0.20*tau	****** + *******tau	-1	-1	-1	0.662	0.424	0.424
-1	albcorr_fmatchedweak	Aqua	All	24609	10434	1691	216	0.94	0.59	08/ 84/ 07	08/ 64/ 26	10/ 56/ 32	04/ 50/ 44	08/ 77/ 14	0.068	0.01 + 0.26*tau	-0.32 + 0.42*tau	0.03 + 0.22*tau	-0.20 + 0.35*tau	-1	-1	-1	0.628	0.454	0.487
-1	albcorr_fmatchedweak_noclou	Aqua	All	23013	8894	1473	187	0.93	0.6	09/ 84/ 06	09/ 67/ 22	10/ 57/ 32	05/ 51/ 43	09/ 78/ 11	0.064	0.01 + 0.26*tau	-0.21 + 0.35*tau	0.02 + 0.22*tau	-0.16 + 0.32*tau	-1	-1	-1	0.623	0.451	0.477
-1	albcorr_fmatchedstrong	Aqua	All	18349	7314	836	97	0.91	0.61	06/ 86/ 06	08/ 69/ 22	13/ 61/ 25	06/ 55/ 38	07/ 81/ 11	0.057	-0.00 + 0.27*tau	-0.25 + 0.43*tau	0.02 + 0.21*tau	-0.63 + 0.56*tau	-1	-1	-1	0.679	0.445	0.542
-1	albcorr_fmatchedstrong_nocl	Aqua	All	16933	6042	689	80	0.9	0.63	07/ 87/ 04	09/ 72/ 17	13/ 64/ 22	07/ 58/ 33	08/ 83/ 08	0.052	-0.00 + 0.26*tau	-0.21 + 0.40*tau	0.02 + 0.21*tau	****** + *******tau	-1	-1	-1	0.661	0.441	0.441
-1	albcorr_fclimweak	Aqua	All	23857	10555	1619	195	0.95	0.61	06/ 84/ 08	07/ 64/ 27	10/ 56/ 32	04/ 51/ 43	07/ 77/ 15	0.069	0.01 + 0.26*tau	-0.11 + 0.31*tau	0.03 + 0.22*tau	-0.36 + 0.44*tau	-1	-1	-1	0.631	0.439	0.495
-1	albcorr_fclimweak_nocloud	Aqua	All	22232	8944	1407	164	0.94	0.62	07/ 85/ 07	08/ 68/ 23	10/ 59/ 30	04/ 54/ 40	08/ 79/ 12	0.063	0.00 + 0.26*tau	-0.03 + 0.24*tau	0.02 + 0.21*tau	-0.31 + 0.40*tau	-1	-1	-1	0.622	0.426	0.474
-1	albcorr_fclimstrong	Aqua	All	15798	6026	650	58	0.94	0.6	06/ 87/ 06	07/ 69/ 23	10/ 58/ 31	06/ 48/ 44	06/ 81/ 11	0.056	-0.00 + 0.27*tau	****** + *******tau	0.02 + 0.22*tau	****** + *******tau	-1	-1	-1	0.641	0.451	0.451
-1	albcorr_fclimstrong_nocloud	Aqua	All	14413	4922	513	53	0.93	0.63	06/ 88/ 05	08/ 73/ 18	12/ 61/ 26	07/ 50/ 41	07/ 83/ 09	0.05	-0.00 + 0.27*tau	****** + *******tau	0.01 + 0.21*tau	****** + *******tau	-1	-1	-1	0.649	0.433	0.433
-1	corr1_fclimweak	Aqua	All	24463	10224	1476	125	0.9	0.61	07/ 84/ 08	10/ 66/ 23	13/ 59/ 27	08/ 58/ 32	08/ 77/ 13	0.064	0.00 + 0.27*tau	-0.16 + 0.35*tau	0.03 + 0.21*tau	0.02 + 0.23*tau	-1	-1	-1	0.59	0.424	0.446
-1	corr1_fclimweak_nocloud	Aqua	All	22754	8662	1277	107	0.89	0.62	07/ 84/ 07	11/ 69/ 19	13/ 62/ 24	13/ 57/ 29	08/ 79/ 11	0.059	-0.00 + 0.27*tau	-0.02 + 0.25*tau	0.03 + 0.21*tau	0.17 + 0.15*tau	-1	-1	-1	0.602	0.408	0.448
-1	corr1_fclimstrong	Aqua	All	16119	5828	574	36	0.9	0.59	06/ 87/ 06	09/ 70/ 19	11/ 61/ 27	16/ 61/ 22	07/ 82/ 10	0.053	-0.01 + 0.29*tau	****** + *******tau	0.02 + 0.22*tau	****** + *******tau	-1	-1	-1	0.694	0.43	0.43
-1	corr1_fclimstrong_nocloud	Aqua	All	14672	4767	446	35	0.89	0.62	06/ 88/ 05	10/ 73/ 15	13/ 65/ 21	17/ 62/ 20	07/ 84/ 07	0.048	-0.01 + 0.29*tau	****** + *******tau	0.02 + 0.21*tau	****** + *******tau	-1	-1	-1	0.691	0.404	0.404
-1	corr2_fmatchedweak	Aqua	All	25199	10110	1572	141	0.9	0.59	08/ 83/ 07	11/ 65/ 22	12/ 57/ 29	14/ 56/ 29	09/ 77/ 12	0.064	0.00 + 0.27*tau	-0.49 + 0.52*tau	0.03 + 0.22*tau	0.21 + 0.14*tau	-1	-1	-1	0.616	0.434	0.47
-1	corr2_fmatchedweak_nocloud	Aqua	All	23508	8610	1383	120	0.88	0.6	09/ 84/ 06	12/ 68/ 19	13/ 58/ 27	15/ 55/ 28	10/ 79/ 10	0.059	0.00 + 0.28*tau	-0.27 + 0.39*tau	0.03 + 0.22*tau	0.09 + 0.19*tau	-1	-1	-1	0.594	0.437	0.444
-1	corr2_fmatchedstrong	Aqua	All	18719	7116	750	56	0.87	0.61	07/ 86/ 06	10/ 69/ 19	15/ 62/ 21	19/ 57/ 23	08/ 81/ 10	0.055	-0.01 + 0.29*tau	-0.54 + 0.59*tau	0.03 + 0.21*tau	****** + *******tau	-1	-1	-1	0.72	0.433	0.433
-1	corr2_fmatchedstrong_noclou	Aqua	All	17242	5880	603	56	0.85	0.62	07/ 87/ 04	11/ 73/ 15	16/ 65/ 18	19/ 64/ 16	08/ 83/ 07	0.05	-0.01 + 0.30*tau	-0.54 + 0.57*tau	0.02 + 0.22*tau	****** + *******tau	-1	-1	-1	0.667	0.421	0.421
0	raw_nobuddy	Terra	All	770	178	0	0	7.45	0.03	00/ 22/ 76	00/ 00/100	00/ 00/ 00	00/ 00/ 00	00/ 18/ 81	0.15	****** + *******tau	****** + *******tau	-0.01 + 0.96*tau	****** + *******tau	-1	-1	-1.00-	-999	-999	999
0	raw_nosdcheck	Terra	All	757	164	0	0	7.6	0	00/ 22/ 76	00/ 00/100	00/ 00/ 00	00/ 00/ 00	00/ 18/ 80	0.145	****** + *******tau	****** + *******tau	-0.02 + 0.99*tau	****** + *******tau	-1	-1	-1.00-	-999	-999	999
0	raw	Terra	All	683	142	0	0	7.54	0	00/ 20/ 79	00/ 00/100	00/ 00/ 00	00/ 00/ 00	00/ 17/ 82	0.141	****** + *******tau	****** + *******tau	-0.02 + 1.00*tau	****** + *******tau	-1	-1	-1.00-	-999	-999	999
0	raw_fqa	Terra	All	362	8	0	0	6.84	0.3	00/ 40/ 59	00/ 00/100	00/ 00/ 00	00/ 00/ 00	00/ 39/ 60	0.083	****** + *******tau	****** + *******tau	****** + *******tau	****** + *******tau	-1	-1	-1.00-	-999	-999	999
0	raw_fqa_nocloud	Terra	All	327	3	0	0	6.13	0.8	00/ 44/ 55	00/ 00/100	00/ 00/ 00	00/ 00/ 00	00/ 44/ 55	0.075	****** + *******tau	****** + *******tau	****** + *******tau	****** + *******tau	-1	-1	-1.00-	-999	-999	999
0	nocorr_fmatchedweak	Terra	All	362	8	0	0	6.84	0.3	00/ 40/ 59	00/ 00/100	00/ 00/ 00	00/ 00/ 00	00/ 39/ 60	0.083	****** + *******tau	****** + *******tau	****** + *******tau	****** + *******tau	-1	-1	-1.00-	-999	-999	999
0	nocorr_fmatchedweak_nocloud	Terra	All	327	3	0	0	6.13	0.8	00/ 44/ 55	00/ 00/100	00/ 00/ 00	00/ 00/ 00	00/ 44/ 55	0.075	****** + *******tau	****** + *******tau	****** + *******tau	****** + *******tau	-1	-1	-1.00-	-999	-999	999
0	nocorr_fmatchedstrong	Terra	All	296	3	0	0	16.36	0	00/ 40/ 59	00/ 00/100	00/ 00/ 00	00/ 00/ 00	00/ 40/ 59	0.077	****** + *******tau	****** + *******tau	****** + *******tau	****** + *******tau	-1	-1	-1.00-	-999	-999	999
0	nocorr_fmatchedstrong_noclo	Terra	All	259	2	0	0	-999	-999	00/ 44/ 54	00/ 00/100	00/ 00/ 00	00/ 00/ 00	00/ 44/ 55	0.069	****** + *******tau	****** + *******tau	****** + *******tau	****** + *******tau	-1	-1	-1.00-	-999	-999	999
0	nocorr_fclimweak	Terra	All	323	6	0	0	10.65	0.13	00/ 41/ 58	00/ 00/100	00/ 00/ 00	00/ 00/ 00	00/ 40/ 59	0.083	****** + *******tau	****** + *******tau	****** + *******tau	****** + *******tau	-1	-1	-1.00-	-999	-999	999
0	nocorr_fclimweak_nocloud	Terra	All	292	3	0	0	13.11	0.93	00/ 45/ 54	00/ 00/100	00/ 00/ 00	00/ 00/ 00	00/ 44/ 55	0.072	****** + *******tau	****** + *******tau	****** + *******tau	****** + *******tau	-1	-1	-1.00-	-999	-999	999
0	nocorr_fclimstrong	Terra	All	229	2	0	0	-999	-999	00/ 44/ 55	00/ 00/100	00/ 00/ 00	00/ 00/ 00	00/ 44/ 55	0.077	****** + *******tau	****** + *******tau	****** + *******tau	****** + *******tau	-1	-1	-1.00-	-999	-999	999
0	nocorr_fclimstrong_nocloud	Terra	All	200	1	0	0	-999	-999	00/ 49/ 50	00/ 00/100	00/ 00/ 00	00/ 00/ 00	00/ 49/ 50	0.068	****** + *******tau	****** + *******tau	****** + *******tau	****** + *******tau	-1	-1	-1.00-	-999	-999	999
0	albcorr_fmatchedweak	Terra	All	356	15	0	0	7.54	0.05	00/ 19/ 80	00/ 00/100	00/ 00/ 00	00/ 00/ 00	00/ 18/ 81	0.1	****** + *******tau	****** + *******tau	****** + *******tau	****** + *******tau	-1	-1	-1.00-	-999	-999	999
0	albcorr_fmatchedweak_noclou	Terra	All	322	9	0	0	7.8	0.04	00/ 22/ 77	00/ 00/100	00/ 00/ 00	00/ 00/ 00	00/ 21/ 78	0.094	****** + *******tau	****** + *******tau	****** + *******tau	****** + *******tau	-1	-1	-1.00-	-999	-999	999
0	albcorr_fmatchedstrong	Terra	All	292	6	0	0	12.61	0	00/ 13/ 86	00/ 00/100	00/ 00/ 00	00/ 00/ 00	00/ 12/ 87	0.102	****** + *******tau	****** + *******tau	****** + *******tau	****** + *******tau	-1	-1	-1.00-	-999	-999	999
0	albcorr_fmatchedstrong_nocl	Terra	All	257	3	0	0	14.48	0.99	00/ 14/ 85	00/ 00/100	00/ 00/ 00	00/ 00/ 00	00/ 14/ 85	0.096	****** + *******tau	****** + *******tau	****** + *******tau	****** + *******tau	-1	-1	-1.00-	-999	-999	999
0	albcorr_fclimweak	Terra	All	316	14	0	0	7.7	0.04	00/ 12/ 87	00/ 00/100	00/ 00/ 00	00/ 00/ 00	00/ 11/ 88	0.109	****** + *******tau	****** + *******tau	****** + *******tau	****** + *******tau	-1	-1	-1.00-	-999	-999	999
0	albcorr_fclimweak_nocloud	Terra	All	290	6	0	0	12.91	0.18	00/ 15/ 84	00/ 00/100	00/ 00/ 00	00/ 00/ 00	00/ 15/ 84	0.1	****** + *******tau	****** + *******tau	****** + *******tau	****** + *******tau	-1	-1	-1.00-	-999	-999	999
0	albcorr_fclimstrong	Terra	All	224	6	0	0	8.51	0.08	00/ 04/ 95	00/ 00/100	00/ 00/ 00	00/ 00/ 00	00/ 04/ 95	0.11	****** + *******tau	****** + *******tau	****** + *******tau	****** + *******tau	-1	-1	-1.00-	-999	-999	999
0	albcorr_fclimstrong_nocloud	Terra	All	197	3	0	0	7.9	0.01	00/ 05/ 94	00/ 00/100	00/ 00/ 00	00/ 00/ 00	00/ 05/ 94	0.103	****** + *******tau	****** + *******tau	****** + *******tau	****** + *******tau	-1	-1	-1.00-	-999	-999	999
0	corr1_fclimweak	Terra	All	316	14	0	0	7.7	0.04	00/ 12/ 87	00/ 00/100	00/ 00/ 00	00/ 00/ 00	00/ 11/ 88	0.109	****** + *******tau	****** + *******tau	****** + *******tau	****** + *******tau	-1	-1	-1.00-	-999	-999	999
0	corr1_fclimweak_nocloud	Terra	All	290	6	0	0	12.91	0.18	00/ 15/ 84	00/ 00/100	00/ 00/ 00	00/ 00/ 00	00/ 15/ 84	0.1	****** + *******tau	****** + *******tau	****** + *******tau	****** + *******tau	-1	-1	-1.00-	-999	-999	999
0	corr1_fclimstrong	Terra	All	224	6	0	0	8.51	0.08	00/ 04/ 95	00/ 00/100	00/ 00/ 00	00/ 00/ 00	00/ 04/ 95	0.11	****** + *******tau	****** + *******tau	****** + *******tau	****** + *******tau	-1	-1	-1.00-	-999	-999	999
0	corr1_fclimstrong_nocloud	Terra	All	197	3	0	0	7.9	0.01	00/ 05/ 94	00/ 00/100	00/ 00/ 00	00/ 00/ 00	00/ 05/ 94	0.103	****** + *******tau	****** + *******tau	****** + *******tau	****** + *******tau	-1	-1	-1.00-	-999	-999	999
0	corr2_fmatchedweak	Terra	All	356	15	0	0	7.54	0.05	00/ 19/ 80	00/ 00/100	00/ 00/ 00	00/ 00/ 00	00/ 18/ 81	0.1	****** + *******tau	****** + *******tau	****** + *******tau	****** + *******tau	-1	-1	-1.00-	-999	-999	999
0	corr2_fmatchedweak_nocloud	Terra	All	322	9	0	0	7.8	0.04	00/ 22/ 77	00/ 00/100	00/ 00/ 00	00/ 00/ 00	00/ 21/ 78	0.094	****** + *******tau	****** + *******tau	****** + *******tau	****** + *******tau	-1	-1	-1.00-	-999	-999	999
0	corr2_fmatchedstrong	Terra	All	292	6	0	0	12.61	0	00/ 13/ 86	00/ 00/100	00/ 00/ 00	00/ 00/ 00	00/ 12/ 87	0.102	****** + *******tau	****** + *******tau	****** + *******tau	****** + *******tau	-1	-1	-1.00-	-999	-999	999
0	corr2_fmatchedstrong_noclou	Terra	All	257	3	0	0	14.48	0.99	00/ 14/ 85	00/ 00/100	00/ 00/ 00	00/ 00/ 00	00/ 14/ 85	0.096	****** + *******tau	****** + *******tau	****** + *******tau	****** + *******tau	-1	-1	-1.00-	-999	-999	999
0	raw_nobuddy	Aqua	All	455	247	3	0	9.6	0.1	01/ 21/ 76	00/ 00/100	00/ 00/100	00/ 00/ 00	01/ 13/ 85	0.188	****** + *******tau	****** + *******tau	-0.00 + 0.94*tau	****** + *******tau	-1	-1	-1.00-	-999	-999	999
0	raw_nosdcheck	Aqua	All	454	222	3	0	9.3	0.1	01/ 20/ 77	00/ 00/100	00/ 00/100	00/ 00/ 00	01/ 13/ 85	0.182	****** + *******tau	****** + *******tau	-0.00 + 0.95*tau	****** + *******tau	-1	-1	-1.00-	-999	-999	999
0	raw	Aqua	All	397	189	3	0	10.83	0.21	01/ 17/ 81	00/ 00/100	00/ 00/100	00/ 00/ 00	00/ 11/ 87	0.18	****** + *******tau	****** + *******tau	0.00 + 0.92*tau	****** + *******tau	-1	-1	-1.00-	-999	-999	999
0	raw_fqa	Aqua	All	185	16	0	0	7.69	0.11	00/ 29/ 70	00/ 00/100	00/ 00/ 00	00/ 00/ 00	00/ 26/ 72	0.106	****** + *******tau	****** + *******tau	****** + *******tau	****** + *******tau	-1	-1	-1.00-	-999	-999	999
0	raw_fqa_nocloud	Aqua	All	157	7	0	0	8.46	0.2	00/ 34/ 64	00/ 00/100	00/ 00/ 00	00/ 00/ 00	00/ 32/ 66	0.092	****** + *******tau	****** + *******tau	****** + *******tau	****** + *******tau	-1	-1	-1.00-	-999	-999	999
0	nocorr_fmatchedweak	Aqua	All	185	16	0	0	7.68	0.11	00/ 29/ 70	00/ 00/100	00/ 00/ 00	00/ 00/ 00	00/ 26/ 72	0.106	****** + *******tau	****** + *******tau	****** + *******tau	****** + *******tau	-1	-1	-1.00-	-999	-999	999
0	nocorr_fmatchedweak_nocloud	Aqua	All	157	7	0	0	8.46	0.2	00/ 34/ 64	00/ 00/100	00/ 00/ 00	00/ 00/ 00	00/ 32/ 66	0.092	****** + *******tau	****** + *******tau	****** + *******tau	****** + *******tau	-1	-1	-1.00-	-999	-999	999
0	nocorr_fmatchedstrong	Aqua	All	134	8	0	0	7.81	0.14	00/ 32/ 67	00/ 00/100	00/ 00/ 00	00/ 00/ 00	00/ 30/ 69	0.098	****** + *******tau	****** + *******tau	****** + *******tau	****** + *******tau	-1	-1	-1.00-	-999	-999	999
0	nocorr_fmatchedstrong_noclo	Aqua	All	110	3	0	0	6.55	0.35	00/ 40/ 60	00/ 00/100	00/ 00/ 00	00/ 00/ 00	00/ 38/ 61	0.083	****** + *******tau	****** + *******tau	****** + *******tau	****** + *******tau	-1	-1	-1.00-	-999	-999	999
0	nocorr_fclimweak	Aqua	All	151	8	0	0	6.53	0.77	00/ 30/ 69	00/ 00/100	00/ 00/ 00	00/ 00/ 00	00/ 28/ 71	0.098	****** + *******tau	****** + *******tau	****** + *******tau	****** + *******tau	-1	-1	-1.00-	-999	-999	999
0	nocorr_fclimweak_nocloud	Aqua	All	126	3	0	0	6.67	0.36	00/ 34/ 65	00/ 00/100	00/ 00/ 00	00/ 00/ 00	00/ 34/ 65	0.087	****** + *******tau	****** + *******tau	****** + *******tau	****** + *******tau	-1	-1	-1.00-	-999	-999	999
0	nocorr_fclimstrong	Aqua	All	93	0	0	0	-999	-999	00/ 35/ 64	00/ 00/ 00	00/ 00/ 00	00/ 00/ 00	00/ 35/ 64	0.08	****** + *******tau	****** + *******tau	****** + *******tau	****** + *******tau	-1	-1	-1.00-	-999	-999	999
0	nocorr_fclimstrong_nocloud	Aqua	All	75	1	0	0	-999	-999	00/ 41/ 58	00/ 00/100	00/ 00/ 00	00/ 00/ 00	00/ 40/ 59	0.074	****** + *******tau	****** + *******tau	****** + *******tau	****** + *******tau	-1	-1	-1.00-	-999	-999	999
0	albcorr_fmatchedweak	Aqua	All	184	17	0	0	7.98	0.07	00/ 13/ 86	00/ 00/100	00/ 00/ 00	00/ 00/ 00	00/ 11/ 87	0.121	****** + *******tau	****** + *******tau	****** + *******tau	****** + *******tau	-1	-1	-1.00-	-999	-999	999
0	albcorr_fmatchedweak_noclou	Aqua	All	156	8	0	0	8.73	0.11	00/ 19/ 79	00/ 00/100	00/ 00/ 00	00/ 00/ 00	00/ 18/ 80	0.108	****** + *******tau	****** + *******tau	****** + *******tau	****** + *******tau	-1	-1	-1.00-	-999	-999	999
0	albcorr_fmatchedstrong	Aqua	All	129	14	0	0	9.02	0.02	00/ 08/ 91	00/ 00/100	00/ 00/ 00	00/ 00/ 00	00/ 07/ 92	0.126	****** + *******tau	****** + *******tau	****** + *******tau	****** + *******tau	-1	-1	-1.00-	-999	-999	999
0	albcorr_fmatchedstrong_nocl	Aqua	All	108	5	0	0	7.74	0.07	00/ 11/ 88	00/ 00/100	00/ 00/ 00	00/ 00/ 00	00/ 10/ 89	0.11	****** + *******tau	****** + *******tau	****** + *******tau	****** + *******tau	-1	-1	-1.00-	-999	-999	999
0	albcorr_fclimweak	Aqua	All	147	13	0	0	7.6	0.06	00/ 09/ 90	00/ 00/100	00/ 00/ 00	00/ 00/ 00	00/ 08/ 91	0.125	****** + *******tau	****** + *******tau	****** + *******tau	****** + *******tau	-1	-1	-1.00-	-999	-999	999
0	albcorr_fclimweak_nocloud	Aqua	All	124	5	0	0	7.63	0.34	00/ 12/ 87	00/ 00/100	00/ 00/ 00	00/ 00/ 00	00/ 12/ 87	0.113	****** + *******tau	****** + *******tau	****** + *******tau	****** + *******tau	-1	-1	-1.00-	-999	-999	999
0	albcorr_fclimstrong	Aqua	All	89	4	0	0	6.59	0.94	00/ 06/ 93	00/ 00/100	00/ 00/ 00	00/ 00/ 00	00/ 06/ 93	0.115	****** + *******tau	****** + *******tau	****** + *******tau	****** + *******tau	-1	-1	-1.00-	-999	-999	999
0	albcorr_fclimstrong_nocloud	Aqua	All	75	1	0	0	-999	-999	00/ 06/ 93	00/ 00/100	00/ 00/ 00	00/ 00/ 00	00/ 06/ 93	0.111	****** + *******tau	****** + *******tau	****** + *******tau	****** + *******tau	-1	-1	-1.00-	-999	-999	999
0	corr1_fclimweak	Aqua	All	147	13	0	0	7.6	0.06	00/ 09/ 90	00/ 00/100	00/ 00/ 00	00/ 00/ 00	00/ 08/ 91	0.125	****** + *******tau	****** + *******tau	****** + *******tau	****** + *******tau	-1	-1	-1.00-	-999	-999	999
0	corr1_fclimweak_nocloud	Aqua	All	124	5	0	0	7.63	0.34	00/ 12/ 87	00/ 00/100	00/ 00/ 00	00/ 00/ 00	00/ 12/ 87	0.113	****** + *******tau	****** + *******tau	****** + *******tau	****** + *******tau	-1	-1	-1.00-	-999	-999	999
0	corr1_fclimstrong	Aqua	All	89	4	0	0	6.59	0.94	00/ 06/ 93	00/ 00/100	00/ 00/ 00	00/ 00/ 00	00/ 06/ 93	0.115	****** + *******tau	****** + *******tau	****** + *******tau	****** + *******tau	-1	-1	-1.00-	-999	-999	999
0	corr1_fclimstrong_nocloud	Aqua	All	75	1	0	0	-999	-999	00/ 06/ 93	00/ 00/100	00/ 00/ 00	00/ 00/ 00	00/ 06/ 93	0.111	****** + *******tau	****** + *******tau	****** + *******tau	****** + *******tau	-1	-1	-1.00-	-999	-999	999
0	corr2_fmatchedweak	Aqua	All	184	17	0	0	7.98	0.07	00/ 13/ 86	00/ 00/100	00/ 00/ 00	00/ 00/ 00	00/ 11/ 87	0.121	****** + *******tau	****** + *******tau	****** + *******tau	****** + *******tau	-1	-1	-1.00-	-999	-999	999
0	corr2_fmatchedweak_nocloud	Aqua	All	156	8	0	0	8.73	0.11	00/ 19/ 79	00/ 00/100	00/ 00/ 00	00/ 00/ 00	00/ 18/ 80	0.108	****** + *******tau	****** + *******tau	****** + *******tau	****** + *******tau	-1	-1	-1.00-	-999	-999	999
0	corr2_fmatchedstrong	Aqua	All	129	14	0	0	9.02	0.02	00/ 08/ 91	00/ 00/100	00/ 00/ 00	00/ 00/ 00	00/ 07/ 92	0.126	****** + *******tau	****** + *******tau	****** + *******tau	****** + *******tau	-1	-1	-1.00-	-999	-999	999
0	corr2_fmatchedstrong_noclou	Aqua	All	108	5	0	0	7.74	0.07	00/ 11/ 88	00/ 00/100	00/ 00/ 00	00/ 00/ 00	00/ 10/ 89	0.11	****** + *******tau	****** + *******tau	****** + *******tau	****** + *******tau	-1	-1	-1.00-	-999	-999	999
1	raw_nobuddy	Terra	All	2224	568	51	7	1.26	0.49	02/ 72/ 25	01/ 23/ 75	01/ 39/ 58	00/ 00/100	01/ 62/ 35	0.108	-0.09 + 0.68*tau	****** + *******tau	0.06 + 0.33*tau	****** + *******tau	-1	-1	-1.00-	-999	-999	999
1	raw_nosdcheck	Terra	All	2213	528	51	7	1.24	0.49	02/ 73/ 24	01/ 24/ 74	01/ 39/ 58	00/ 00/100	01/ 63/ 34	0.105	0.03 + 0.32*tau	****** + *******tau	0.05 + 0.32*tau	****** + *******tau	-1	-1	-1.00-	-999	-999	999
1	raw	Terra	All	2096	466	46	7	1.21	0.51	01/ 75/ 23	01/ 27/ 71	02/ 41/ 56	00/ 00/100	01/ 65/ 32	0.101	-0.04 + 0.51*tau	****** + *******tau	0.07 + 0.24*tau	****** + *******tau	-1	-1	-1.00-	-999	-999	999
1	raw_fqa	Terra	All	1522	218	30	4	1.23	0.67	02/ 89/ 07	01/ 39/ 59	00/ 50/ 50	00/ 00/100	02/ 82/ 15	0.089	0.03 + 0.25*tau	****** + *******tau	0.07 + 0.18*tau	****** + *******tau	-1	-1	-1.00-	-999	-999	999
1	raw_fqa_nocloud	Terra	All	1378	167	25	4	1.18	0.7	03/ 89/ 06	01/ 43/ 54	00/ 56/ 44	00/ 00/100	03/ 84/ 12	0.089	-0.04 + 0.42*tau	****** + *******tau	0.09 + 0.09*tau	****** + *******tau	-1	-1	-1.00-	-999	-999	999
1	nocorr_fmatchedweak	Terra	All	1272	166	29	4	1.2	0.72	02/ 91/ 05	01/ 43/ 54	00/ 58/ 41	00/ 00/100	02/ 85/ 11	0.087	0.01 + 0.29*tau	****** + *******tau	0.07 + 0.14*tau	****** + *******tau	-1	-1	-1.00-	-999	-999	999
1	nocorr_fmatchedweak_nocloud	Terra	All	1148	120	24	4	1.15	0.77	04/ 90/ 04	02/ 49/ 48	00/ 62/ 37	00/ 00/100	04/ 86/ 09	0.087	-0.00 + 0.30*tau	****** + *******tau	0.07 + 0.09*tau	****** + *******tau	-1	-1	-1.00-	-999	-999	999
1	nocorr_fmatchedstrong	Terra	All	1011	109	18	3	0.99	0.66	04/ 93/ 01	03/ 61/ 34	05/ 66/ 27	00/ 00/100	04/ 89/ 05	0.045	-0.08 + 0.51*tau	****** + *******tau	0.03 + 0.18*tau	****** + *******tau	-1	-1	-1.00-	-999	-999	999
1	nocorr_fmatchedstrong_noclo	Terra	All	890	80	14	3	0.95	0.68	06/ 92/ 01	05/ 70/ 25	07/ 71/ 21	00/ 00/100	06/ 89/ 03	0.044	****** + *******tau	****** + *******tau	0.04 + 0.14*tau	****** + *******tau	-1	-1	-1.00-	-999	-999	999
1	nocorr_fclimweak	Terra	All	1331	179	26	3	1.05	0.54	03/ 91/ 04	02/ 44/ 52	00/ 61/ 38	00/ 33/ 66	03/ 85/ 11	0.062	0.01 + 0.26*tau	****** + *******tau	0.05 + 0.22*tau	****** + *******tau	-1	-1	-1.00-	-999	-999	999
1	nocorr_fclimweak_nocloud	Terra	All	1187	130	21	3	0.99	0.59	05/ 91/ 03	03/ 51/ 44	00/ 66/ 33	00/ 33/ 66	05/ 87/ 07	0.054	-0.01 + 0.29*tau	****** + *******tau	0.05 + 0.18*tau	****** + *******tau	-1	-1	-1.00-	-999	-999	999
1	nocorr_fclimstrong	Terra	All	971	96	13	2	1.08	0.77	05/ 91/ 02	02/ 68/ 29	00/ 76/ 23	00/ 00/100	05/ 89/ 05	0.046	-0.02 + 0.33*tau	****** + *******tau	0.05 + 0.09*tau	****** + *******tau	-1	-1	-1.00-	-999	-999	999
1	nocorr_fclimstrong_nocloud	Terra	All	820	67	13	2	1.06	0.78	07/ 90/ 01	02/ 73/ 23	00/ 76/ 23	00/ 00/100	07/ 89/ 03	0.045	****** + *******tau	****** + *******tau	****** + *******tau	****** + *******tau	-1	-1	-1.00-	-999	-999	999
1	albcorr_fmatchedweak	Terra	All	1244	196	30	4	1.22	0.74	01/ 86/ 11	02/ 42/ 55	00/ 60/ 40	00/ 00/100	01/ 80/ 17	0.089	0.01 + 0.30*tau	****** + *******tau	0.07 + 0.15*tau	****** + *******tau	-1	-1	-1.00-	-999	-999	999
1	albcorr_fmatchedweak_noclou	Terra	All	1137	134	23	4	1.17	0.79	02/ 88/ 08	02/ 45/ 52	00/ 60/ 39	00/ 00/100	02/ 83/ 14	0.087	-0.01 + 0.32*tau	****** + *******tau	0.07 + 0.12*tau	****** + *******tau	-1	-1	-1.00-	-999	-999	999
1	albcorr_fmatchedstrong	Terra	All	977	148	18	3	1.03	0.69	01/ 90/ 08	02/ 54/ 43	05/ 66/ 27	00/ 00/100	01/ 85/ 13	0.051	-0.13 + 0.67*tau	****** + *******tau	0.05 + 0.16*tau	****** + *******tau	-1	-1	-1.00-	-999	-999	999
1	albcorr_fmatchedstrong_nocl	Terra	All	869	106	14	3	1	0.7	01/ 93/ 05	03/ 57/ 38	07/ 71/ 21	00/ 00/100	01/ 88/ 09	0.043	****** + *******tau	****** + *******tau	0.01 + 0.24*tau	****** + *******tau	-1	-1	-1.00-	-999	-999	999
1	albcorr_fclimweak	Terra	All	1281	229	30	3	1.12	0.59	01/ 84/ 14	02/ 34/ 63	00/ 50/ 50	00/ 33/ 66	01/ 76/ 22	0.069	0.01 + 0.28*tau	****** + *******tau	0.05 + 0.23*tau	****** + *******tau	-1	-1	-1.00-	-999	-999	999
1	albcorr_fclimweak_nocloud	Terra	All	1155	164	23	3	1.05	0.62	01/ 86/ 11	03/ 44/ 52	00/ 56/ 43	00/ 33/ 66	01/ 80/ 17	0.058	-0.02 + 0.33*tau	****** + *******tau	0.06 + 0.17*tau	****** + *******tau	-1	-1	-1.00-	-999	-999	999
1	albcorr_fclimstrong	Terra	All	926	140	15	2	1.18	0.79	00/ 88/ 11	01/ 52/ 45	00/ 73/ 26	00/ 00/100	00/ 83/ 15	0.052	-0.04 + 0.41*tau	****** + *******tau	0.06 + 0.14*tau	****** + *******tau	-1	-1	-1.00-	-999	-999	999
1	albcorr_fclimstrong_nocloud	Terra	All	796	94	14	2	1.15	0.81	01/ 90/ 07	02/ 67/ 30	00/ 64/ 35	00/ 00/100	01/ 87/ 10	0.043	****** + *******tau	****** + *******tau	0.04 + 0.14*tau	****** + *******tau	-1	-1	-1.00-	-999	-999	999
1	corr1_fclimweak	Terra	All	1328	199	20	2	0.98	0.6	01/ 84/ 14	02/ 48/ 48	00/ 85/ 15	00/ 00/100	01/ 79/ 18	0.06	0.01 + 0.18*tau	****** + *******tau	0.06 + 0.13*tau	****** + *******tau	-1	-1	-1.00-	-999	-999	999
1	corr1_fclimweak_nocloud	Terra	All	1185	146	15	2	0.92	0.64	01/ 86/ 11	02/ 54/ 42	00/ 86/ 13	00/ 00/100	01/ 83/ 15	0.051	-0.00 + 0.21*tau	****** + *******tau	0.06 + 0.10*tau	****** + *******tau	-1	-1	-1.00-	-999	-999	999
1	corr1_fclimstrong	Terra	All	954	122	8	2	1.02	0.78	00/ 88/ 10	01/ 65/ 32	00/100/ 00	00/ 00/100	01/ 85/ 13	0.046	-0.01 + 0.26*tau	****** + *******tau	0.05 + 0.09*tau	****** + *******tau	-1	-1	-1.00-	-999	-999	999
1	corr1_fclimstrong_nocloud	Terra	All	815	80	10	2	0.99	0.79	01/ 91/ 07	02/ 73/ 23	00/ 90/ 10	00/ 00/100	01/ 89/ 09	0.039	****** + *******tau	****** + *******tau	0.03 + 0.09*tau	****** + *******tau	-1	-1	-1.00-	-999	-999	999
1	corr2_fmatchedweak	Terra	All	1281	176	19	4	1.06	0.74	01/ 87/ 11	02/ 50/ 46	00/ 89/ 10	00/ 25/ 75	01/ 82/ 15	0.078	0.02 + 0.20*tau	****** + *******tau	0.08 + 0.06*tau	****** + *******tau	-1	-1	-1.00-	-999	-999	999
1	corr2_fmatchedweak_nocloud	Terra	All	1160	126	15	4	1.02	0.78	02/ 88/ 09	03/ 57/ 39	00/ 93/ 06	00/ 25/ 75	02/ 85/ 12	0.077	-0.11 + 0.54*tau	****** + *******tau	0.06 + 0.09*tau	****** + *******tau	-1	-1	-1.00-	-999	-999	999
1	corr2_fmatchedstrong	Terra	All	1006	130	13	3	0.9	0.67	01/ 91/ 07	03/ 62/ 33	07/ 84/ 07	00/ 33/ 66	01/ 87/ 10	0.045	-0.06 + 0.38*tau	****** + *******tau	0.05 + 0.10*tau	****** + *******tau	-1	-1	-1.00-	-999	-999	999
1	corr2_fmatchedstrong_noclou	Terra	All	892	89	11	3	0.86	0.68	01/ 92/ 05	04/ 70/ 24	09/ 90/ 00	00/ 33/ 66	01/ 90/ 07	0.039	****** + *******tau	****** + *******tau	0.00 + 0.22*tau	****** + *******tau	-1	-1	-1.00-	-999	-999	999
1	raw_nobuddy	Aqua	All	2089	567	47	3	1.11	0.47	01/ 71/ 26	00/ 21/ 78	04/ 36/ 59	00/ 00/100	01/ 60/ 38	0.102	0.03 + 0.35*tau	****** + *******tau	0.07 + 0.29*tau	****** + *******tau	-1	-1	-1.00-	-999	-999	999
1	raw_nosdcheck	Aqua	All	2062	516	46	3	1.09	0.47	01/ 72/ 26	00/ 23/ 76	04/ 34/ 60	00/ 00/100	01/ 61/ 36	0.097	-0.05 + 0.57*tau	****** + *******tau	0.08 + 0.25*tau	****** + *******tau	-1	-1	-1.00-	-999	-999	999
1	raw	Aqua	All	1963	455	42	2	1.06	0.47	01/ 73/ 24	00/ 25/ 74	07/ 30/ 61	00/ 00/100	01/ 63/ 34	0.094	0.01 + 0.35*tau	****** + *******tau	0.06 + 0.31*tau	****** + *******tau	-1	-1	-1.00-	-999	-999	999
1	raw_fqa	Aqua	All	1341	193	26	1	1.13	0.56	01/ 88/ 09	01/ 44/ 54	00/ 42/ 57	00/ 00/100	01/ 82/ 16	0.06	0.02 + 0.31*tau	****** + *******tau	0.04 + 0.26*tau	****** + *******tau	-1	-1	-1.00-	-999	-999	999
1	raw_fqa_nocloud	Aqua	All	1206	139	24	1	1.09	0.52	02/ 89/ 08	01/ 51/ 47	00/ 37/ 62	00/ 00/100	02/ 84/ 13	0.056	0.01 + 0.34*tau	****** + *******tau	0.03 + 0.28*tau	****** + *******tau	-1	-1	-1.00-	-999	-999	999
1	nocorr_fmatchedweak	Aqua	All	1140	150	25	1	1.1	0.57	01/ 91/ 06	01/ 49/ 49	00/ 44/ 56	00/ 00/100	01/ 85/ 12	0.054	0.01 + 0.30*tau	****** + *******tau	0.04 + 0.23*tau	****** + *******tau	-1	-1	-1.00-	-999	-999	999
1	nocorr_fmatchedweak_nocloud	Aqua	All	1024	108	23	1	1.06	0.52	02/ 92/ 05	01/ 55/ 42	00/ 39/ 60	00/ 00/100	02/ 87/ 09	0.05	-0.04 + 0.45*tau	****** + *******tau	0.02 + 0.30*tau	****** + *******tau	-1	-1	-1.00-	-999	-999	999
1	nocorr_fmatchedstrong	Aqua	All	924	91	12	0	1.17	0.79	03/ 92/ 04	01/ 67/ 31	00/ 50/ 50	00/ 00/ 00	02/ 90/ 07	0.045	****** + *******tau	****** + *******tau	0.04 + 0.15*tau	****** + *******tau	-1	-1	-1.00-	-999	-999	999
1	nocorr_fmatchedstrong_noclo	Aqua	All	815	58	10	0	1.14	0.73	03/ 93/ 02	01/ 68/ 29	00/ 50/ 50	00/ 00/ 00	03/ 91/ 04	0.044	****** + *******tau	****** + *******tau	****** + *******tau	****** + *******tau	-1	-1	-1.00-	-999	-999	999
1	nocorr_fclimweak	Aqua	All	1204	158	19	2	1.07	0.53	02/ 90/ 07	01/ 51/ 46	00/ 47/ 52	00/ 00/100	02/ 85/ 12	0.055	-0.04 + 0.45*tau	****** + *******tau	0.03 + 0.25*tau	****** + *******tau	-1	-1	-1.00-	-999	-999	999
1	nocorr_fclimweak_nocloud	Aqua	All	1054	109	17	2	1.02	0.48	03/ 91/ 04	01/ 57/ 40	00/ 47/ 52	00/ 00/100	03/ 87/ 09	0.051	****** + *******tau	****** + *******tau	0.01 + 0.31*tau	****** + *******tau	-1	-1	-1.00-	-999	-999	999
1	nocorr_fclimstrong	Aqua	All	879	81	13	1	1	0.53	03/ 92/ 03	01/ 64/ 34	07/ 38/ 53	00/ 00/100	03/ 89/ 06	0.045	****** + *******tau	****** + *******tau	-0.01 + 0.32*tau	****** + *******tau	-1	-1	-1.00-	-999	-999	999
1	nocorr_fclimstrong_nocloud	Aqua	All	759	50	10	1	0.92	0.44	05/ 92/ 02	02/ 72/ 26	10/ 30/ 60	00/ 00/100	05/ 90/ 04	0.045	****** + *******tau	****** + *******tau	****** + *******tau	****** + *******tau	-1	-1	-1.00-	-999	-999	999
1	albcorr_fmatchedweak	Aqua	All	1111	184	25	1	1.13	0.58	01/ 84/ 13	01/ 43/ 55	00/ 44/ 56	00/ 00/100	01/ 78/ 20	0.062	0.02 + 0.30*tau	****** + *******tau	0.05 + 0.24*tau	****** + *******tau	-1	-1	-1.00-	-999	-999	999
1	albcorr_fmatchedweak_noclou	Aqua	All	1005	133	23	1	1.07	0.54	01/ 86/ 11	01/ 52/ 45	00/ 39/ 60	00/ 00/100	01/ 82/ 16	0.054	-0.02 + 0.40*tau	****** + *******tau	0.04 + 0.25*tau	****** + *******tau	-1	-1	-1.00-	-999	-999	999
1	albcorr_fmatchedstrong	Aqua	All	897	126	12	0	1.21	0.78	00/ 86/ 12	01/ 53/ 44	00/ 50/ 50	00/ 00/ 00	00/ 82/ 16	0.053	****** + *******tau	****** + *******tau	0.05 + 0.18*tau	****** + *******tau	-1	-1	-1.00-	-999	-999	999
1	albcorr_fmatchedstrong_nocl	Aqua	All	789	92	10	0	1.18	0.76	00/ 88/ 10	01/ 65/ 33	00/ 50/ 50	00/ 00/ 00	00/ 86/ 13	0.047	****** + *******tau	****** + *******tau	0.04 + 0.18*tau	****** + *******tau	-1	-1	-1.00-	-999	-999	999
1	albcorr_fclimweak	Aqua	All	1159	202	26	2	1.14	0.56	00/ 83/ 16	00/ 40/ 59	03/ 38/ 57	00/ 00/100	00/ 75/ 23	0.066	-0.02 + 0.43*tau	****** + *******tau	0.04 + 0.26*tau	****** + *******tau	-1	-1	-1.00-	-999	-999	999
1	albcorr_fclimweak_nocloud	Aqua	All	1023	141	24	2	1.08	0.52	00/ 85/ 13	00/ 49/ 49	04/ 41/ 54	00/ 00/100	00/ 80/ 18	0.058	****** + *******tau	****** + *******tau	0.02 + 0.29*tau	****** + *******tau	-1	-1	-1.00-	-999	-999	999
1	albcorr_fclimstrong	Aqua	All	838	122	15	1	1.08	0.56	00/ 85/ 13	01/ 47/ 50	06/ 20/ 73	00/ 00/100	00/ 79/ 19	0.056	****** + *******tau	****** + *******tau	0.01 + 0.32*tau	****** + *******tau	-1	-1	-1.00-	-999	-999	999
1	albcorr_fclimstrong_nocloud	Aqua	All	729	82	12	1	0.99	0.49	00/ 88/ 10	02/ 65/ 31	08/ 25/ 66	00/ 00/100	00/ 85/ 13	0.049	****** + *******tau	****** + *******tau	-0.01 + 0.36*tau	****** + *******tau	-1	-1	-1.00-	-999	-999	999
1	corr1_fclimweak	Aqua	All	1231	150	13	1	0.91	0.55	00/ 83/ 16	02/ 61/ 36	00/ 76/ 23	00/ 00/100	00/ 80/ 18	0.054	0.03 + 0.11*tau	****** + *******tau	0.07 + 0.06*tau	****** + *******tau	-1	-1	-1.00-	-999	-999	999
1	corr1_fclimweak_nocloud	Aqua	All	1077	105	11	1	0.86	0.51	00/ 85/ 13	03/ 69/ 26	00/ 81/ 18	00/ 00/100	00/ 84/ 14	0.049	****** + *******tau	****** + *******tau	0.06 + 0.11*tau	****** + *******tau	-1	-1	-1.00-	-999	-999	999
1	corr1_fclimstrong	Aqua	All	883	87	8	1	0.85	0.52	00/ 86/ 12	03/ 70/ 26	00/ 75/ 25	00/ 00/100	01/ 84/ 14	0.047	****** + *******tau	****** + *******tau	0.04 + 0.13*tau	****** + *******tau	-1	-1	-1.00-	-999	-999	999
1	corr1_fclimstrong_nocloud	Aqua	All	761	57	6	1	0.78	0.44	00/ 89/ 09	05/ 73/ 21	00/ 66/ 33	00/ 00/100	01/ 88/ 10	0.043	****** + *******tau	****** + *******tau	****** + *******tau	****** + *******tau	-1	-1	-1.00-	-999	-999	999
1	corr2_fmatchedweak	Aqua	All	1177	130	16	1	0.89	0.52	01/ 84/ 14	02/ 64/ 33	00/ 62/ 37	00/ 00/100	01/ 82/ 16	0.051	0.02 + 0.13*tau	****** + *******tau	0.06 + 0.10*tau	****** + *******tau	-1	-1	-1.00-	-999	-999	999
1	corr2_fmatchedweak_nocloud	Aqua	All	1057	92	14	1	0.85	0.46	01/ 86/ 11	04/ 68/ 27	00/ 71/ 28	00/ 00/100	01/ 85/ 13	0.046	-0.01 + 0.22*tau	****** + *******tau	0.07 + 0.07*tau	****** + *******tau	-1	-1	-1.00-	-999	-999	999
1	corr2_fmatchedstrong	Aqua	All	937	92	9	0	0.97	0.76	01/ 87/ 11	02/ 73/ 23	00/ 88/ 11	00/ 00/ 00	01/ 86/ 12	0.045	****** + *******tau	****** + *******tau	0.04 + 0.10*tau	****** + *******tau	-1	-1	-1.00-	-999	-999	999
1	corr2_fmatchedstrong_noclou	Aqua	All	824	63	7	0	0.93	0.7	00/ 90/ 08	04/ 77/ 17	00/ 85/ 14	00/ 00/ 00	01/ 89/ 09	0.04	****** + *******tau	****** + *******tau	****** + *******tau	****** + *******tau	-1	-1	-1.00-	-999	-999	999
2	raw_nobuddy	Terra	All	6431	2615	342	0	1.1	0.54	11/ 82/ 06	03/ 58/ 38	04/ 52/ 42	00/ 00/ 00	08/ 74/ 16	0.077	0.06 + 0.12*tau	****** + *******tau	0.01 + 0.27*tau	****** + *******tau	-1	-1	-1.00-	-999	-999	999
2	raw_nosdcheck	Terra	All	6395	2565	335	1	1.09	0.55	11/ 82/ 06	03/ 59/ 37	04/ 53/ 42	00/ 00/100	09/ 75/ 15	0.075	0.06 + 0.11*tau	****** + *******tau	0.01 + 0.25*tau	****** + *******tau	-1	-1	-1.00-	-999	-999	999
2	raw	Terra	All	6053	2399	302	0	1.08	0.56	09/ 84/ 05	03/ 61/ 35	04/ 54/ 40	00/ 00/ 00	07/ 77/ 15	0.071	0.05 + 0.13*tau	****** + *******tau	0.02 + 0.24*tau	****** + *******tau	-1	-1	-1.00-	-999	-999	999
2	raw_fqa	Terra	All	4489	1274	143	0	0.99	0.59	12/ 84/ 02	05/ 74/ 19	07/ 65/ 27	00/ 00/ 00	11/ 81/ 07	0.057	0.01 + 0.21*tau	****** + *******tau	0.00 + 0.22*tau	****** + *******tau	-1	-1	-1.00-	-999	-999	999
2	raw_fqa_nocloud	Terra	All	4270	1092	125	0	0.97	0.62	14/ 83/ 02	06/ 76/ 17	08/ 69/ 22	00/ 00/ 00	12/ 81/ 05	0.054	0.01 + 0.21*tau	****** + *******tau	0.01 + 0.20*tau	****** + *******tau	-1	-1	-1.00-	-999	-999	999
2	nocorr_fmatchedweak	Terra	All	4147	1210	138	0	0.98	0.6	13/ 84/ 02	06/ 77/ 16	07/ 68/ 23	00/ 00/ 00	11/ 82/ 06	0.055	0.02 + 0.19*tau	****** + *******tau	0.01 + 0.21*tau	****** + *******tau	-1	-1	-1.00-	-999	-999	999
2	nocorr_fmatchedweak_nocloud	Terra	All	3944	1045	121	0	0.97	0.63	14/ 83/ 01	06/ 78/ 15	08/ 72/ 19	00/ 00/ 00	12/ 82/ 05	0.053	0.01 + 0.20*tau	****** + *******tau	0.01 + 0.20*tau	****** + *******tau	-1	-1	-1.00-	-999	-999	999
2	nocorr_fmatchedstrong	Terra	All	3408	1065	126	0	0.96	0.6	14/ 83/ 01	06/ 79/ 13	09/ 68/ 22	00/ 00/ 00	12/ 82/ 04	0.054	0.01 + 0.20*tau	****** + *******tau	0.01 + 0.19*tau	****** + *******tau	-1	-1	-1.00-	-999	-999	999
2	nocorr_fmatchedstrong_noclo	Terra	All	3217	912	109	0	0.94	0.63	16/ 82/ 01	08/ 80/ 11	09/ 74/ 16	00/ 00/ 00	14/ 81/ 03	0.052	0.00 + 0.23*tau	****** + *******tau	0.01 + 0.18*tau	****** + *******tau	-1	-1	-1.00-	-999	-999	999
2	nocorr_fclimweak	Terra	All	3867	1182	136	0	0.98	0.59	14/ 83/ 01	06/ 77/ 16	08/ 65/ 25	00/ 00/ 00	12/ 81/ 05	0.056	0.02 + 0.19*tau	****** + *******tau	0.00 + 0.22*tau	****** + *******tau	-1	-1	-1.00-	-999	-999	999
2	nocorr_fclimweak_nocloud	Terra	All	3669	1015	118	0	0.96	0.63	15/ 83/ 01	06/ 79/ 13	08/ 72/ 19	00/ 00/ 00	13/ 81/ 04	0.053	0.02 + 0.17*tau	****** + *******tau	-0.01 + 0.26*tau	****** + *******tau	-1	-1	-1.00-	-999	-999	999
2	nocorr_fclimstrong	Terra	All	3132	1009	121	0	0.96	0.59	16/ 82/ 01	07/ 79/ 13	10/ 66/ 22	00/ 00/ 00	14/ 81/ 04	0.056	0.01 + 0.21*tau	****** + *******tau	0.00 + 0.21*tau	****** + *******tau	-1	-1	-1.00-	-999	-999	999
2	nocorr_fclimstrong_nocloud	Terra	All	2935	863	107	0	0.94	0.63	17/ 81/ 00	07/ 81/ 10	10/ 73/ 15	00/ 00/ 00	15/ 81/ 03	0.053	0.01 + 0.19*tau	****** + *******tau	0.01 + 0.18*tau	****** + *******tau	-1	-1	-1.00-	-999	-999	999
2	albcorr_fmatchedweak	Terra	All	3932	1435	142	0	1.03	0.64	04/ 91/ 04	03/ 73/ 22	07/ 69/ 23	00/ 00/ 00	04/ 86/ 09	0.051	0.01 + 0.20*tau	****** + *******tau	0.01 + 0.21*tau	****** + *******tau	-1	-1	-1.00-	-999	-999	999
2	albcorr_fmatchedweak_noclou	Terra	All	3741	1252	122	0	1.01	0.66	05/ 91/ 03	03/ 76/ 19	07/ 73/ 18	00/ 00/ 00	05/ 87/ 07	0.046	0.01 + 0.19*tau	****** + *******tau	-0.00 + 0.22*tau	****** + *******tau	-1	-1	-1.00-	-999	-999	999
2	albcorr_fmatchedstrong	Terra	All	3188	1288	127	0	1.01	0.65	04/ 91/ 03	03/ 76/ 20	07/ 70/ 22	00/ 00/ 00	04/ 86/ 08	0.049	0.02 + 0.18*tau	****** + *******tau	0.00 + 0.22*tau	****** + *******tau	-1	-1	-1.00-	-999	-999	999
2	albcorr_fmatchedstrong_nocl	Terra	All	3016	1120	109	0	0.99	0.67	05/ 91/ 03	04/ 78/ 16	08/ 75/ 16	00/ 00/ 00	04/ 88/ 07	0.044	-0.00 + 0.22*tau	****** + *******tau	0.01 + 0.19*tau	****** + *******tau	-1	-1	-1.00-	-999	-999	999
2	albcorr_fclimweak	Terra	All	3597	1435	164	0	1.06	0.64	03/ 91/ 04	02/ 71/ 25	04/ 62/ 33	00/ 00/ 00	03/ 85/ 11	0.053	0.03 + 0.16*tau	****** + *******tau	0.01 + 0.22*tau	****** + *******tau	-1	-1	-1.00-	-999	-999	999
2	albcorr_fclimweak_nocloud	Terra	All	3435	1241	139	0	1.04	0.67	04/ 92/ 03	03/ 76/ 20	04/ 69/ 26	00/ 00/ 00	04/ 87/ 08	0.046	0.03 + 0.14*tau	****** + *******tau	0.01 + 0.19*tau	****** + *******tau	-1	-1	-1.00-	-999	-999	999
2	albcorr_fclimstrong	Terra	All	2883	1243	147	0	1.04	0.64	03/ 92/ 03	03/ 73/ 23	06/ 63/ 30	00/ 00/ 00	03/ 86/ 10	0.05	0.02 + 0.19*tau	****** + *******tau	0.00 + 0.22*tau	****** + *******tau	-1	-1	-1.00-	-999	-999	999
2	albcorr_fclimstrong_nocloud	Terra	All	2714	1073	128	0	1.02	0.67	04/ 92/ 02	03/ 78/ 17	06/ 68/ 25	00/ 00/ 00	04/ 88/ 07	0.043	0.01 + 0.18*tau	****** + *******tau	0.01 + 0.19*tau	****** + *******tau	-1	-1	-1.00-	-999	-999	999
2	corr1_fclimweak	Terra	All	3649	1411	141	0	1.01	0.64	04/ 91/ 04	03/ 75/ 20	07/ 68/ 24	00/ 00/ 00	04/ 86/ 09	0.05	0.02 + 0.16*tau	****** + *******tau	-0.01 + 0.26*tau	****** + *******tau	-1	-1	-1.00-	-999	-999	999
2	corr1_fclimweak_nocloud	Terra	All	3485	1212	122	0	0.99	0.67	04/ 91/ 03	04/ 78/ 16	08/ 72/ 18	00/ 00/ 00	04/ 88/ 07	0.044	-0.00 + 0.23*tau	****** + *******tau	-0.00 + 0.22*tau	****** + *******tau	-1	-1	-1.00-	-999	-999	999
2	corr1_fclimstrong	Terra	All	2925	1223	127	0	0.99	0.63	03/ 92/ 03	04/ 78/ 17	08/ 67/ 23	00/ 00/ 00	04/ 87/ 08	0.048	0.00 + 0.21*tau	****** + *******tau	0.01 + 0.20*tau	****** + *******tau	-1	-1	-1.00-	-999	-999	999
2	corr1_fclimstrong_nocloud	Terra	All	2759	1047	112	0	0.97	0.66	04/ 93/ 02	04/ 80/ 14	09/ 71/ 18	00/ 00/ 00	04/ 89/ 06	0.042	0.01 + 0.19*tau	****** + *******tau	0.01 + 0.19*tau	****** + *******tau	-1	-1	-1.00-	-999	-999	999
2	corr2_fmatchedweak	Terra	All	3982	1408	124	0	0.98	0.63	04/ 91/ 04	04/ 77/ 18	08/ 68/ 22	00/ 00/ 00	04/ 87/ 08	0.049	0.00 + 0.21*tau	****** + *******tau	-0.01 + 0.27*tau	****** + *******tau	-1	-1	-1.00-	-999	-999	999
2	corr2_fmatchedweak_nocloud	Terra	All	3793	1216	110	0	0.96	0.66	05/ 91/ 03	04/ 80/ 15	09/ 74/ 16	00/ 00/ 00	05/ 88/ 06	0.044	0.00 + 0.21*tau	****** + *******tau	0.01 + 0.19*tau	****** + *******tau	-1	-1	-1.00-	-999	-999	999
2	corr2_fmatchedstrong	Terra	All	3234	1260	112	0	0.96	0.64	04/ 91/ 03	04/ 79/ 15	09/ 66/ 23	00/ 00/ 00	04/ 87/ 07	0.047	0.00 + 0.20*tau	****** + *******tau	-0.02 + 0.27*tau	****** + *******tau	-1	-1	-1.00-	-999	-999	999
2	corr2_fmatchedstrong_noclou	Terra	All	3062	1088	97	0	0.95	0.66	05/ 91/ 03	05/ 82/ 12	10/ 73/ 16	00/ 00/ 00	05/ 88/ 05	0.042	-0.01 + 0.24*tau	****** + *******tau	0.00 + 0.20*tau	****** + *******tau	-1	-1	-1.00-	-999	-999	999
2	raw_nobuddy	Aqua	All	5621	2758	402	2	1.17	0.59	09/ 83/ 07	01/ 50/ 47	02/ 45/ 51	00/ 50/ 50	06/ 71/ 22	0.082	0.06 + 0.12*tau	****** + *******tau	0.02 + 0.25*tau	****** + *******tau	-1	-1	-1.00-	-999	-999	999
2	raw_nosdcheck	Aqua	All	5574	2690	395	2	1.16	0.59	09/ 83/ 07	01/ 51/ 46	02/ 45/ 51	00/ 50/ 50	06/ 71/ 21	0.081	0.06 + 0.13*tau	****** + *******tau	0.02 + 0.25*tau	****** + *******tau	-1	-1	-1.00-	-999	-999	999
2	raw	Aqua	All	5273	2516	364	2	1.15	0.61	07/ 84/ 07	01/ 53/ 44	02/ 48/ 48	00/ 50/ 50	05/ 73/ 20	0.077	0.06 + 0.13*tau	****** + *******tau	0.02 + 0.24*tau	****** + *******tau	-1	-1	-1.00-	-999	-999	999
2	raw_fqa	Aqua	All	3720	1160	124	0	1.04	0.64	11/ 85/ 02	03/ 71/ 24	04/ 62/ 32	00/ 00/ 00	09/ 81/ 08	0.058	0.04 + 0.15*tau	****** + *******tau	0.02 + 0.19*tau	****** + *******tau	-1	-1	-1.00-	-999	-999	999
2	raw_fqa_nocloud	Aqua	All	3506	982	106	0	1.01	0.65	12/ 84/ 02	04/ 75/ 20	03/ 67/ 28	00/ 00/ 00	10/ 82/ 06	0.056	0.04 + 0.14*tau	****** + *******tau	0.02 + 0.17*tau	****** + *******tau	-1	-1	-1.00-	-999	-999	999
2	nocorr_fmatchedweak	Aqua	All	3438	1099	122	0	1.04	0.64	11/ 85/ 02	03/ 73/ 23	04/ 63/ 31	00/ 00/ 00	09/ 82/ 07	0.057	0.04 + 0.15*tau	****** + *******tau	0.02 + 0.19*tau	****** + *******tau	-1	-1	-1.00-	-999	-999	999
2	nocorr_fmatchedweak_nocloud	Aqua	All	3238	936	104	0	1.01	0.65	13/ 84/ 01	04/ 76/ 19	03/ 69/ 26	00/ 00/ 00	11/ 82/ 06	0.055	0.03 + 0.14*tau	****** + *******tau	0.02 + 0.17*tau	****** + *******tau	-1	-1	-1.00-	-999	-999	999
2	nocorr_fmatchedstrong	Aqua	All	2755	922	101	0	1.01	0.66	13/ 85/ 01	03/ 77/ 18	04/ 69/ 25	00/ 00/ 00	10/ 82/ 06	0.056	0.03 + 0.15*tau	****** + *******tau	0.00 + 0.21*tau	****** + *******tau	-1	-1	-1.00-	-999	-999	999
2	nocorr_fmatchedstrong_noclo	Aqua	All	2572	783	85	0	0.98	0.67	14/ 84/ 00	04/ 81/ 14	03/ 75/ 21	00/ 00/ 00	12/ 83/ 04	0.055	0.03 + 0.13*tau	****** + *******tau	0.02 + 0.14*tau	****** + *******tau	-1	-1	-1.00-	-999	-999	999
2	nocorr_fclimweak	Aqua	All	3250	1051	112	0	1.03	0.63	12/ 85/ 02	03/ 74/ 22	05/ 64/ 30	00/ 00/ 00	09/ 82/ 07	0.056	0.02 + 0.17*tau	****** + *******tau	-0.00 + 0.24*tau	****** + *******tau	-1	-1	-1.00-	-999	-999	999
2	nocorr_fclimweak_nocloud	Aqua	All	3043	893	93	0	1	0.65	13/ 84/ 01	04/ 77/ 18	04/ 69/ 25	00/ 00/ 00	11/ 82/ 05	0.054	0.03 + 0.16*tau	****** + *******tau	0.01 + 0.19*tau	****** + *******tau	-1	-1	-1.00-	-999	-999	999
2	nocorr_fclimstrong	Aqua	All	2581	870	90	1	1.01	0.66	13/ 85/ 01	03/ 78/ 17	04/ 65/ 30	00/ 00/100	10/ 83/ 06	0.055	0.02 + 0.17*tau	****** + *******tau	0.01 + 0.19*tau	****** + *******tau	-1	-1	-1.00-	-999	-999	999
2	nocorr_fclimstrong_nocloud	Aqua	All	2396	736	72	0	0.98	0.66	15/ 84/ 00	03/ 84/ 11	05/ 69/ 25	00/ 00/ 00	12/ 83/ 03	0.054	0.02 + 0.16*tau	****** + *******tau	0.01 + 0.18*tau	****** + *******tau	-1	-1	-1.00-	-999	-999	999
2	albcorr_fmatchedweak	Aqua	All	3214	1330	124	0	1.08	0.67	04/ 91/ 04	02/ 67/ 29	04/ 62/ 32	00/ 00/ 00	03/ 83/ 12	0.056	0.04 + 0.13*tau	****** + *******tau	0.02 + 0.19*tau	****** + *******tau	-1	-1	-1.00-	-999	-999	999
2	albcorr_fmatchedweak_noclou	Aqua	All	3063	1123	105	0	1.05	0.69	04/ 91/ 03	03/ 72/ 24	03/ 69/ 26	00/ 00/ 00	04/ 86/ 09	0.051	0.04 + 0.13*tau	****** + *******tau	0.02 + 0.17*tau	****** + *******tau	-1	-1	-1.00-	-999	-999	999
2	albcorr_fmatchedstrong	Aqua	All	2563	1122	103	0	1.06	0.69	03/ 92/ 03	02/ 70/ 27	04/ 66/ 28	00/ 00/ 00	03/ 85/ 11	0.053	0.03 + 0.14*tau	****** + *******tau	0.02 + 0.19*tau	****** + *******tau	-1	-1	-1.00-	-999	-999	999
2	albcorr_fmatchedstrong_nocl	Aqua	All	2415	950	85	0	1.03	0.7	03/ 93/ 02	03/ 74/ 22	03/ 75/ 21	00/ 00/ 00	03/ 87/ 08	0.049	0.03 + 0.13*tau	****** + *******tau	0.03 + 0.14*tau	****** + *******tau	-1	-1	-1.00-	-999	-999	999
2	albcorr_fclimweak	Aqua	All	2992	1276	152	1	1.11	0.68	03/ 91/ 05	02/ 66/ 31	02/ 56/ 40	00/ 00/100	02/ 83/ 14	0.056	0.04 + 0.14*tau	****** + *******tau	0.01 + 0.22*tau	****** + *******tau	-1	-1	-1.00-	-999	-999	999
2	albcorr_fclimweak_nocloud	Aqua	All	2838	1080	123	0	1.08	0.69	03/ 91/ 04	02/ 70/ 27	03/ 67/ 29	00/ 00/ 00	03/ 85/ 11	0.05	0.04 + 0.13*tau	****** + *******tau	0.01 + 0.21*tau	****** + *******tau	-1	-1	-1.00-	-999	-999	999
2	albcorr_fclimstrong	Aqua	All	2355	1075	123	1	1.09	0.69	02/ 93/ 03	02/ 68/ 28	03/ 56/ 39	00/ 00/100	02/ 84/ 12	0.053	0.04 + 0.14*tau	****** + *******tau	0.02 + 0.20*tau	****** + *******tau	-1	-1	-1.00-	-999	-999	999
2	albcorr_fclimstrong_nocloud	Aqua	All	2213	910	93	0	1.06	0.7	03/ 93/ 03	02/ 72/ 24	04/ 68/ 26	00/ 00/ 00	03/ 87/ 09	0.047	0.03 + 0.13*tau	****** + *******tau	0.01 + 0.20*tau	****** + *******tau	-1	-1	-1.00-	-999	-999	999
2	corr1_fclimweak	Aqua	All	3042	1264	120	0	1.06	0.67	03/ 91/ 05	02/ 70/ 27	05/ 61/ 33	00/ 00/ 00	03/ 84/ 12	0.053	0.03 + 0.16*tau	****** + *******tau	0.00 + 0.23*tau	****** + *******tau	-1	-1	-1.00-	-999	-999	999
2	corr1_fclimweak_nocloud	Aqua	All	2876	1072	97	0	1.03	0.69	03/ 91/ 04	03/ 74/ 22	05/ 69/ 25	00/ 00/ 00	03/ 86/ 09	0.048	0.03 + 0.15*tau	****** + *******tau	0.02 + 0.17*tau	****** + *******tau	-1	-1	-1.00-	-999	-999	999
2	corr1_fclimstrong	Aqua	All	2392	1065	99	0	1.05	0.68	02/ 93/ 03	02/ 73/ 24	04/ 65/ 30	00/ 00/ 00	02/ 86/ 10	0.051	0.02 + 0.16*tau	****** + *******tau	0.00 + 0.21*tau	****** + *******tau	-1	-1	-1.00-	-999	-999	999
2	corr1_fclimstrong_nocloud	Aqua	All	2246	896	75	0	1.01	0.69	03/ 93/ 03	03/ 78/ 18	05/ 72/ 22	00/ 00/ 00	03/ 89/ 07	0.045	0.02 + 0.16*tau	****** + *******tau	0.02 + 0.16*tau	****** + *******tau	-1	-1	-1.00-	-999	-999	999
2	corr2_fmatchedweak	Aqua	All	3268	1291	112	0	1.03	0.67	04/ 91/ 04	03/ 71/ 25	05/ 70/ 24	00/ 00/ 00	03/ 85/ 10	0.053	0.02 + 0.15*tau	****** + *******tau	0.02 + 0.17*tau	****** + *******tau	-1	-1	-1.00-	-999	-999	999
2	corr2_fmatchedweak_nocloud	Aqua	All	3103	1096	93	0	1	0.68	04/ 92/ 03	03/ 76/ 19	05/ 77/ 17	00/ 00/ 00	04/ 87/ 07	0.048	0.02 + 0.15*tau	****** + *******tau	0.02 + 0.16*tau	****** + *******tau	-1	-1	-1.00-	-999	-999	999
2	corr2_fmatchedstrong	Aqua	All	2597	1103	90	0	1.01	0.68	03/ 92/ 03	03/ 74/ 22	06/ 73/ 20	00/ 00/ 00	03/ 87/ 09	0.05	0.02 + 0.17*tau	****** + *******tau	0.01 + 0.19*tau	****** + *******tau	-1	-1	-1.00-	-999	-999	999
2	corr2_fmatchedstrong_noclou	Aqua	All	2444	933	75	0	0.98	0.69	03/ 93/ 02	03/ 78/ 17	05/ 80/ 14	00/ 00/ 00	03/ 89/ 06	0.046	0.01 + 0.16*tau	****** + *******tau	0.03 + 0.13*tau	****** + *******tau	-1	-1	-1.00-	-999	-999	999
3	raw_nobuddy	Terra	All	5684	2579	109	1	1.47	0.13	06/ 66/ 27	00/ 14/ 84	04/ 12/ 82	100/ 00/ 00	04/ 50/ 45	0.154	0.03 + 0.30*tau	****** + *******tau	-0.03 + 0.73*tau	****** + *******tau	-1	-1	-1.00-	-999	-999	999
3	raw_nosdcheck	Terra	All	5670	2524	105	1	1.48	0.13	06/ 66/ 26	00/ 15/ 83	04/ 13/ 81	100/ 00/ 00	04/ 50/ 45	0.152	0.01 + 0.38*tau	****** + *******tau	-0.02 + 0.72*tau	****** + *******tau	-1	-1	-1.00-	-999	-999	999
3	raw	Terra	All	5525	2368	92	1	1.44	0.14	05/ 67/ 26	00/ 15/ 83	05/ 16/ 78	100/ 00/ 00	04/ 51/ 44	0.149	-0.00 + 0.41*tau	****** + *******tau	-0.02 + 0.70*tau	****** + *******tau	-1	-1	-1.00-	-999	-999	999
3	raw_fqa	Terra	All	4363	1026	28	0	1.42	0.21	08/ 75/ 16	00/ 24/ 75	03/ 42/ 53	00/ 00/ 00	06/ 65/ 27	0.105	0.04 + 0.23*tau	****** + *******tau	0.03 + 0.45*tau	****** + *******tau	-1	-1	-1.00-	-999	-999	999
3	raw_fqa_nocloud	Terra	All	4083	865	31	0	1.39	0.23	08/ 76/ 14	00/ 24/ 74	03/ 32/ 64	00/ 00/ 00	07/ 67/ 25	0.102	0.03 + 0.25*tau	****** + *******tau	0.03 + 0.46*tau	****** + *******tau	-1	-1	-1.00-	-999	-999	999
3	nocorr_fmatchedweak	Terra	All	4007	864	27	0	1.37	0.25	08/ 77/ 13	00/ 26/ 72	03/ 44/ 51	00/ 00/ 00	07/ 68/ 24	0.097	-0.03 + 0.49*tau	****** + *******tau	0.01 + 0.50*tau	****** + *******tau	-1	-1	-1.00-	-999	-999	999
3	nocorr_fmatchedweak_nocloud	Terra	All	3748	710	27	0	1.32	0.26	08/ 78/ 12	01/ 28/ 70	03/ 44/ 51	00/ 00/ 00	07/ 70/ 22	0.094	-0.01 + 0.40*tau	****** + *******tau	0.03 + 0.42*tau	****** + *******tau	-1	-1	-1.00-	-999	-999	999
3	nocorr_fmatchedstrong	Terra	All	3153	343	16	0	1.11	0.42	10/ 82/ 06	02/ 44/ 53	06/ 50/ 43	00/ 00/ 00	09/ 78/ 11	0.064	0.03 + 0.27*tau	****** + *******tau	0.05 + 0.25*tau	****** + *******tau	-1	-1	-1.00-	-999	-999	999
3	nocorr_fmatchedstrong_noclo	Terra	All	2852	249	14	0	1.03	0.46	11/ 83/ 05	02/ 51/ 46	07/ 57/ 35	00/ 00/ 00	10/ 80/ 08	0.06	-0.01 + 0.41*tau	****** + *******tau	0.07 + 0.15*tau	****** + *******tau	-1	-1	-1.00-	-999	-999	999
3	nocorr_fclimweak	Terra	All	4058	873	23	0	1.35	0.24	08/ 78/ 12	00/ 28/ 70	04/ 47/ 47	00/ 00/ 00	07/ 69/ 23	0.096	0.05 + 0.19*tau	****** + *******tau	0.03 + 0.42*tau	****** + *******tau	-1	-1	-1.00-	-999	-999	999
3	nocorr_fclimweak_nocloud	Terra	All	3778	707	24	0	1.3	0.25	09/ 79/ 11	00/ 30/ 68	04/ 45/ 50	00/ 00/ 00	08/ 71/ 20	0.092	0.04 + 0.22*tau	****** + *******tau	0.02 + 0.47*tau	****** + *******tau	-1	-1	-1.00-	-999	-999	999
3	nocorr_fclimstrong	Terra	All	2795	274	18	0	1.06	0.46	10/ 84/ 05	03/ 50/ 46	05/ 55/ 38	00/ 00/ 00	09/ 81/ 09	0.061	0.03 + 0.24*tau	****** + *******tau	0.06 + 0.19*tau	****** + *******tau	-1	-1	-1.00-	-999	-999	999
3	nocorr_fclimstrong_nocloud	Terra	All	2471	196	16	0	0.98	0.45	11/ 84/ 03	05/ 55/ 39	06/ 62/ 31	00/ 00/ 00	11/ 82/ 06	0.057	-0.02 + 0.43*tau	****** + *******tau	0.05 + 0.19*tau	****** + *******tau	-1	-1	-1.00-	-999	-999	999
3	albcorr_fmatchedweak	Terra	All	4086	790	26	0	1.33	0.29	05/ 79/ 14	00/ 33/ 65	03/ 46/ 50	00/ 00/ 00	04/ 72/ 22	0.087	0.01 + 0.32*tau	****** + *******tau	0.03 + 0.39*tau	****** + *******tau	-1	-1	-1.00-	-999	-999	999
3	albcorr_fmatchedweak_noclou	Terra	All	3848	620	27	0	1.29	0.31	05/ 81/ 12	01/ 35/ 63	03/ 44/ 51	00/ 00/ 00	05/ 74/ 19	0.082	-0.00 + 0.37*tau	****** + *******tau	0.03 + 0.38*tau	****** + *******tau	-1	-1	-1.00-	-999	-999	999
3	albcorr_fmatchedstrong	Terra	All	3060	447	17	0	1.14	0.43	05/ 83/ 11	02/ 42/ 55	05/ 47/ 47	00/ 00/ 00	04/ 77/ 17	0.065	0.01 + 0.29*tau	****** + *******tau	0.05 + 0.23*tau	****** + *******tau	-1	-1	-1.00-	-999	-999	999
3	albcorr_fmatchedstrong_nocl	Terra	All	2794	325	14	0	1.05	0.45	05/ 84/ 09	02/ 50/ 46	07/ 57/ 35	00/ 00/ 00	05/ 81/ 13	0.058	-0.00 + 0.33*tau	****** + *******tau	0.04 + 0.24*tau	****** + *******tau	-1	-1	-1.00-	-999	-999	999
3	albcorr_fclimweak	Terra	All	4024	912	26	0	1.35	0.3	04/ 79/ 16	00/ 30/ 68	00/ 53/ 46	00/ 00/ 00	03/ 70/ 26	0.09	0.04 + 0.20*tau	****** + *******tau	0.03 + 0.40*tau	****** + *******tau	-1	-1	-1.00-	-999	-999	999
3	albcorr_fclimweak_nocloud	Terra	All	3781	717	23	0	1.29	0.31	04/ 81/ 14	01/ 35/ 63	00/ 52/ 47	00/ 00/ 00	04/ 73/ 22	0.085	0.04 + 0.20*tau	****** + *******tau	0.02 + 0.40*tau	****** + *******tau	-1	-1	-1.00-	-999	-999	999
3	albcorr_fclimstrong	Terra	All	2657	420	18	0	1.15	0.47	03/ 83/ 13	02/ 46/ 51	05/ 50/ 44	00/ 00/ 00	03/ 77/ 18	0.065	0.01 + 0.29*tau	****** + *******tau	0.04 + 0.24*tau	****** + *******tau	-1	-1	-1.00-	-999	-999	999
3	albcorr_fclimstrong_nocloud	Terra	All	2369	302	17	0	1.07	0.49	03/ 85/ 10	02/ 54/ 42	05/ 52/ 41	00/ 00/ 00	03/ 81/ 14	0.057	0.01 + 0.28*tau	****** + *******tau	0.04 + 0.24*tau	****** + *******tau	-1	-1	-1.00-	-999	-999	999
3	corr1_fclimweak	Terra	All	4357	621	9	0	1.08	0.32	04/ 78/ 17	03/ 39/ 57	00/ 88/ 11	00/ 00/ 00	04/ 73/ 22	0.073	0.01 + 0.27*tau	****** + *******tau	0.04 + 0.31*tau	****** + *******tau	-1	-1	-1.00-	-999	-999	999
3	corr1_fclimweak_nocloud	Terra	All	4034	498	8	0	1.04	0.34	04/ 80/ 14	04/ 39/ 55	00/100/ 00	00/ 00/ 00	04/ 76/ 19	0.069	0.01 + 0.26*tau	****** + *******tau	0.07 + 0.20*tau	****** + *******tau	-1	-1	-1.00-	-999	-999	999
3	corr1_fclimstrong	Terra	All	2827	271	5	0	0.92	0.46	03/ 83/ 13	07/ 58/ 34	20/ 60/ 20	00/ 00/ 00	03/ 80/ 15	0.054	-0.02 + 0.37*tau	****** + *******tau	0.05 + 0.16*tau	****** + *******tau	-1	-1	-1.00-	-999	-999	999
3	corr1_fclimstrong_nocloud	Terra	All	2495	194	7	0	0.86	0.47	03/ 85/ 10	09/ 60/ 30	14/ 85/ 00	00/ 00/ 00	04/ 83/ 11	0.049	-0.03 + 0.40*tau	****** + *******tau	0.04 + 0.21*tau	****** + *******tau	-1	-1	-1.00-	-999	-999	999
3	corr2_fmatchedweak	Terra	All	4373	548	7	0	1.07	0.3	05/ 79/ 15	03/ 41/ 55	00/100/ 00	00/ 00/ 00	05/ 75/ 19	0.07	-0.04 + 0.45*tau	****** + *******tau	0.05 + 0.25*tau	****** + *******tau	-1	-1	-1.00-	-999	-999	999
3	corr2_fmatchedweak_nocloud	Terra	All	4062	445	8	0	1.04	0.32	05/ 80/ 13	03/ 42/ 54	00/ 87/ 12	00/ 00/ 00	05/ 77/ 17	0.067	-0.07 + 0.56*tau	****** + *******tau	0.07 + 0.20*tau	****** + *******tau	-1	-1	-1.00-	-999	-999	999
3	corr2_fmatchedstrong	Terra	All	3232	300	3	0	0.89	0.4	05/ 83/ 11	06/ 54/ 38	33/ 66/ 00	00/ 00/ 00	05/ 80/ 14	0.055	-0.04 + 0.45*tau	****** + *******tau	0.06 + 0.16*tau	****** + *******tau	-1	-1	-1.00-	-999	-999	999
3	corr2_fmatchedstrong_noclou	Terra	All	2920	218	5	0	0.83	0.44	05/ 84/ 09	07/ 60/ 31	20/ 80/ 00	00/ 00/ 00	05/ 83/ 11	0.05	-0.05 + 0.51*tau	****** + *******tau	0.07 + 0.11*tau	****** + *******tau	-1	-1	-1.00-	-999	-999	999
3	raw_nobuddy	Aqua	All	5801	2628	127	2	1.47	0.11	05/ 69/ 24	00/ 14/ 84	03/ 11/ 85	00/ 50/ 50	04/ 51/ 44	0.155	0.03 + 0.34*tau	****** + *******tau	-0.03 + 0.74*tau	****** + *******tau	-1	-1	-1.00-	-999	-999	999
3	raw_nosdcheck	Aqua	All	5771	2548	115	2	1.45	0.12	05/ 69/ 24	00/ 15/ 84	04/ 11/ 84	00/ 50/ 50	04/ 52/ 43	0.151	0.02 + 0.37*tau	****** + *******tau	-0.02 + 0.71*tau	****** + *******tau	-1	-1	-1.00-	-999	-999	999
3	raw	Aqua	All	5551	2376	91	1	1.51	0.12	05/ 70/ 24	00/ 15/ 83	04/ 12/ 83	00/100/ 00	03/ 53/ 42	0.145	0.03 + 0.32*tau	****** + *******tau	-0.01 + 0.68*tau	****** + *******tau	-1	-1	-1.00-	-999	-999	999
3	raw_fqa	Aqua	All	4260	928	26	0	1.27	0.22	07/ 77/ 15	01/ 24/ 74	03/ 23/ 73	00/ 00/ 00	06/ 67/ 25	0.098	-0.00 + 0.41*tau	****** + *******tau	0.03 + 0.46*tau	****** + *******tau	-1	-1	-1.00-	-999	-999	999
3	raw_fqa_nocloud	Aqua	All	3923	748	24	0	1.24	0.2	07/ 78/ 13	02/ 25/ 72	04/ 20/ 75	00/ 00/ 00	06/ 69/ 23	0.095	0.00 + 0.40*tau	****** + *******tau	0.03 + 0.47*tau	****** + *******tau	-1	-1	-1.00-	-999	-999	999
3	nocorr_fmatchedweak	Aqua	All	3921	802	22	0	1.24	0.24	07/ 79/ 12	01/ 26/ 71	04/ 27/ 68	00/ 00/ 00	06/ 70/ 23	0.091	-0.00 + 0.41*tau	****** + *******tau	0.02 + 0.45*tau	****** + *******tau	-1	-1	-1.00-	-999	-999	999
3	nocorr_fmatchedweak_nocloud	Aqua	All	3611	632	18	0	1.2	0.23	08/ 80/ 11	02/ 27/ 70	05/ 27/ 66	00/ 00/ 00	07/ 72/ 20	0.087	-0.01 + 0.46*tau	****** + *******tau	0.00 + 0.52*tau	****** + *******tau	-1	-1	-1.00-	-999	-999	999
3	nocorr_fmatchedstrong	Aqua	All	3150	331	12	0	0.95	0.29	10/ 83/ 06	02/ 44/ 53	08/ 41/ 50	00/ 00/ 00	09/ 79/ 11	0.061	-0.03 + 0.48*tau	****** + *******tau	0.03 + 0.30*tau	****** + *******tau	-1	-1	-1.00-	-999	-999	999
3	nocorr_fmatchedstrong_noclo	Aqua	All	2846	229	8	0	0.87	0.25	10/ 84/ 05	03/ 49/ 47	12/ 37/ 50	00/ 00/ 00	10/ 81/ 08	0.057	-0.05 + 0.58*tau	****** + *******tau	-0.00 + 0.43*tau	****** + *******tau	-1	-1	-1.00-	-999	-999	999
3	nocorr_fclimweak	Aqua	All	4025	809	21	0	1.15	0.24	07/ 80/ 12	02/ 27/ 70	04/ 33/ 61	00/ 00/ 00	06/ 71/ 22	0.089	-0.00 + 0.40*tau	****** + *******tau	0.01 + 0.50*tau	****** + *******tau	-1	-1	-1.00-	-999	-999	999
3	nocorr_fclimweak_nocloud	Aqua	All	3710	643	18	0	1.11	0.21	08/ 80/ 11	02/ 28/ 68	05/ 33/ 61	00/ 00/ 00	07/ 72/ 19	0.086	-0.02 + 0.46*tau	****** + *******tau	-0.00 + 0.54*tau	****** + *******tau	-1	-1	-1.00-	-999	-999	999
3	nocorr_fclimstrong	Aqua	All	2826	256	11	0	0.9	0.28	10/ 84/ 05	03/ 50/ 45	09/ 27/ 63	00/ 00/ 00	09/ 81/ 08	0.055	-0.05 + 0.58*tau	****** + *******tau	0.01 + 0.37*tau	****** + *******tau	-1	-1	-1.00-	-999	-999	999
3	nocorr_fclimstrong_nocloud	Aqua	All	2494	179	8	0	0.8	0.26	11/ 84/ 04	06/ 54/ 39	12/ 25/ 62	00/ 00/ 00	10/ 82/ 06	0.053	-0.02 + 0.48*tau	****** + *******tau	0.02 + 0.32*tau	****** + *******tau	-1	-1	-1.00-	-999	-999	999
3	albcorr_fmatchedweak	Aqua	All	3966	761	21	0	1.19	0.27	04/ 81/ 13	01/ 32/ 65	04/ 28/ 66	00/ 00/ 00	04/ 73/ 22	0.083	-0.01 + 0.42*tau	****** + *******tau	0.01 + 0.45*tau	****** + *******tau	-1	-1	-1.00-	-999	-999	999
3	albcorr_fmatchedweak_noclou	Aqua	All	3671	580	17	0	1.13	0.25	04/ 83/ 11	02/ 36/ 61	05/ 29/ 64	00/ 00/ 00	04/ 76/ 18	0.077	-0.03 + 0.49*tau	****** + *******tau	-0.01 + 0.52*tau	****** + *******tau	-1	-1	-1.00-	-999	-999	999
3	albcorr_fmatchedstrong	Aqua	All	3037	449	14	0	1	0.31	03/ 84/ 11	02/ 41/ 55	07/ 42/ 50	00/ 00/ 00	03/ 78/ 17	0.062	-0.00 + 0.36*tau	****** + *******tau	0.03 + 0.33*tau	****** + *******tau	-1	-1	-1.00-	-999	-999	999
3	albcorr_fmatchedstrong_nocl	Aqua	All	2763	316	9	0	0.91	0.28	04/ 86/ 09	03/ 48/ 48	11/ 44/ 44	00/ 00/ 00	04/ 82/ 13	0.055	-0.10 + 0.73*tau	****** + *******tau	0.01 + 0.39*tau	****** + *******tau	-1	-1	-1.00-	-999	-999	999
3	albcorr_fclimweak	Aqua	All	3974	865	24	0	1.23	0.29	03/ 80/ 16	01/ 32/ 66	04/ 41/ 54	00/ 00/ 00	02/ 71/ 25	0.084	0.01 + 0.34*tau	****** + *******tau	0.01 + 0.44*tau	****** + *******tau	-1	-1	-1.00-	-999	-999	999
3	albcorr_fclimweak_nocloud	Aqua	All	3689	667	21	0	1.18	0.27	03/ 82/ 13	01/ 35/ 62	04/ 42/ 52	00/ 00/ 00	03/ 75/ 21	0.079	-0.02 + 0.44*tau	****** + *******tau	0.01 + 0.46*tau	****** + *******tau	-1	-1	-1.00-	-999	-999	999
3	albcorr_fclimstrong	Aqua	All	2695	392	13	0	0.99	0.31	03/ 84/ 12	02/ 46/ 50	07/ 30/ 61	00/ 00/ 00	03/ 79/ 17	0.059	-0.05 + 0.52*tau	****** + *******tau	-0.01 + 0.44*tau	****** + *******tau	-1	-1	-1.00-	-999	-999	999
3	albcorr_fclimstrong_nocloud	Aqua	All	2393	287	8	0	0.89	0.3	03/ 86/ 09	04/ 52/ 43	12/ 25/ 62	00/ 00/ 00	03/ 82/ 13	0.052	-0.05 + 0.55*tau	****** + *******tau	-0.01 + 0.40*tau	****** + *******tau	-1	-1	-1.00-	-999	-999	999
3	corr1_fclimweak	Aqua	All	4277	602	11	0	0.92	0.28	03/ 79/ 16	03/ 41/ 55	18/ 27/ 54	00/ 00/ 00	03/ 75/ 21	0.068	-0.05 + 0.50*tau	****** + *******tau	0.04 + 0.31*tau	****** + *******tau	-1	-1	-1.00-	-999	-999	999
3	corr1_fclimweak_nocloud	Aqua	All	3941	450	9	0	0.87	0.25	03/ 82/ 14	04/ 42/ 53	11/ 33/ 55	00/ 00/ 00	03/ 78/ 18	0.065	-0.10 + 0.69*tau	****** + *******tau	0.01 + 0.44*tau	****** + *******tau	-1	-1	-1.00-	-999	-999	999
3	corr1_fclimstrong	Aqua	All	2857	249	7	0	0.76	0.27	03/ 83/ 12	06/ 60/ 33	00/ 42/ 57	00/ 00/ 00	03/ 81/ 14	0.05	-0.07 + 0.56*tau	****** + *******tau	0.01 + 0.34*tau	****** + *******tau	-1	-1	-1.00-	-999	-999	999
3	corr1_fclimstrong_nocloud	Aqua	All	2520	172	4	0	0.67	0.26	03/ 86/ 09	10/ 61/ 28	00/ 75/ 25	00/ 00/ 00	04/ 84/ 11	0.045	-0.09 + 0.65*tau	****** + *******tau	0.03 + 0.30*tau	****** + *******tau	-1	-1	-1.00-	-999	-999	999
3	corr2_fmatchedweak	Aqua	All	4247	528	9	0	0.94	0.26	04/ 80/ 14	04/ 42/ 53	11/ 33/ 55	00/ 00/ 00	04/ 76/ 18	0.067	-0.06 + 0.54*tau	****** + *******tau	0.02 + 0.41*tau	****** + *******tau	-1	-1	-1.00-	-999	-999	999
3	corr2_fmatchedweak_nocloud	Aqua	All	3891	395	9	0	0.9	0.24	04/ 82/ 12	04/ 43/ 52	11/ 44/ 44	00/ 00/ 00	04/ 79/ 16	0.063	-0.06 + 0.57*tau	****** + *******tau	0.04 + 0.33*tau	****** + *******tau	-1	-1	-1.00-	-999	-999	999
3	corr2_fmatchedstrong	Aqua	All	3227	286	5	0	0.77	0.28	04/ 83/ 12	05/ 58/ 35	00/ 40/ 60	00/ 00/ 00	04/ 81/ 14	0.052	-0.06 + 0.55*tau	****** + *******tau	-0.02 + 0.46*tau	****** + *******tau	-1	-1	-1.00-	-999	-999	999
3	corr2_fmatchedstrong_noclou	Aqua	All	2911	190	3	0	0.69	0.24	04/ 85/ 09	06/ 61/ 31	00/ 66/ 33	00/ 00/ 00	04/ 84/ 10	0.048	-0.11 + 0.75*tau	****** + *******tau	0.02 + 0.33*tau	****** + *******tau	-1	-1	-1.00-	-999	-999	999
4	raw_nobuddy	Terra	All	596	412	59	12	0.85	0.55	35/ 61/ 03	20/ 65/ 14	13/ 67/ 18	08/ 58/ 33	28/ 63/ 08	0.079	0.04 + 0.23*tau	****** + *******tau	0.09 + 0.07*tau	****** + *******tau	-1	-1	-1	0.651	0.247	0.247
4	raw_nosdcheck	Terra	All	584	405	57	11	0.85	0.54	36/ 60/ 03	20/ 65/ 13	12/ 70/ 17	09/ 63/ 27	29/ 62/ 08	0.079	0.03 + 0.24*tau	****** + *******tau	0.09 + 0.07*tau	****** + *******tau	-1	-1	-1	0.42	0.227	0.227
4	raw	Terra	All	490	375	48	11	0.83	0.55	41/ 55/ 02	22/ 65/ 12	12/ 70/ 16	09/ 63/ 27	31/ 60/ 07	0.077	0.03 + 0.25*tau	****** + *******tau	0.09 + 0.07*tau	****** + *******tau	-1	-1	-1	0.409	0.227	0.227
4	raw_fqa	Terra	All	347	133	28	6	0.82	0.61	60/ 38/ 01	31/ 62/ 06	14/ 67/ 17	00/ 66/ 33	49/ 46/ 03	0.074	0.07 + 0.22*tau	****** + *******tau	0.11 + 0.04*tau	****** + *******tau	-1	-1	-1.00-	-999	-999	999
4	raw_fqa_nocloud	Terra	All	321	103	23	7	0.82	0.65	62/ 35/ 01	27/ 65/ 07	17/ 65/ 17	00/ 57/ 42	51/ 44/ 04	0.077	0.06 + 0.24*tau	****** + *******tau	0.07 + 0.16*tau	****** + *******tau	-1	-1	-1.00-	-999	-999	999
4	nocorr_fmatchedweak	Terra	All	347	135	25	6	0.81	0.62	60/ 38/ 01	31/ 62/ 05	12/ 68/ 20	00/ 50/ 50	49/ 46/ 03	0.074	0.06 + 0.24*tau	****** + *******tau	0.07 + 0.15*tau	****** + *******tau	-1	-1	-1.00-	-999	-999	999
4	nocorr_fmatchedweak_nocloud	Terra	All	321	107	18	7	0.81	0.64	62/ 35/ 01	27/ 65/ 07	11/ 66/ 22	00/ 57/ 42	51/ 44/ 04	0.077	0.06 + 0.25*tau	****** + *******tau	0.05 + 0.20*tau	****** + *******tau	-1	-1	-1.00-	-999	-999	999
4	nocorr_fmatchedstrong	Terra	All	330	86	12	4	0.79	0.67	72/ 26/ 00	38/ 54/ 06	08/ 83/ 08	00/ 25/ 75	63/ 34/ 02	0.083	0.09 + 0.23*tau	****** + *******tau	0.10 + 0.11*tau	****** + *******tau	-1	-1	-1.00-	-999	-999	999
4	nocorr_fmatchedstrong_noclo	Terra	All	286	63	10	3	0.78	0.66	74/ 25/ 00	41/ 57/ 01	10/ 80/ 10	00/ 33/ 66	66/ 32/ 01	0.087	0.11 + 0.19*tau	****** + *******tau	****** + *******tau	****** + *******tau	-1	-1	-1.00-	-999	-999	999
4	nocorr_fclimweak	Terra	All	342	134	24	8	0.79	0.63	61/ 36/ 01	35/ 58/ 05	16/ 75/ 08	00/ 50/ 50	51/ 44/ 03	0.075	0.07 + 0.22*tau	****** + *******tau	0.11 + 0.06*tau	****** + *******tau	-1	-1	-1.00-	-999	-999	999
4	nocorr_fclimweak_nocloud	Terra	All	325	101	20	8	0.79	0.68	62/ 36/ 01	31/ 62/ 05	20/ 70/ 10	00/ 37/ 62	52/ 43/ 03	0.078	0.05 + 0.29*tau	****** + *******tau	0.09 + 0.12*tau	****** + *******tau	-1	-1	-1.00-	-999	-999	999
4	nocorr_fclimstrong	Terra	All	319	72	15	6	0.82	0.71	73/ 26/ 00	36/ 56/ 06	26/ 73/ 00	00/ 66/ 33	64/ 33/ 01	0.084	0.11 + 0.16*tau	****** + *******tau	****** + *******tau	****** + *******tau	-1	-1	-1.00-	-999	-999	999
4	nocorr_fclimstrong_nocloud	Terra	All	265	53	11	5	0.78	0.7	74/ 24/ 00	43/ 56/ 00	36/ 63/ 00	00/ 40/ 60	67/ 31/ 01	0.089	0.11 + 0.18*tau	****** + *******tau	****** + *******tau	****** + *******tau	-1	-1	-1.00-	-999	-999	999
4	albcorr_fmatchedweak	Terra	All	325	156	25	6	0.82	0.64	49/ 49/ 01	25/ 69/ 05	12/ 68/ 20	00/ 50/ 50	39/ 56/ 04	0.06	0.04 + 0.28*tau	****** + *******tau	0.06 + 0.16*tau	****** + *******tau	-1	-1	-1.00-	-999	-999	999
4	albcorr_fmatchedweak_noclou	Terra	All	307	124	19	7	0.82	0.65	51/ 47/ 00	25/ 66/ 08	10/ 68/ 21	00/ 57/ 42	42/ 53/ 04	0.062	0.03 + 0.31*tau	****** + *******tau	0.05 + 0.19*tau	****** + *******tau	-1	-1	-1.00-	-999	-999	999
4	albcorr_fmatchedstrong	Terra	All	299	121	12	4	0.8	0.65	50/ 49/ 00	28/ 61/ 09	08/ 83/ 08	00/ 25/ 75	42/ 53/ 03	0.062	0.05 + 0.27*tau	****** + *******tau	0.07 + 0.14*tau	****** + *******tau	-1	-1	-1.00-	-999	-999	999
4	albcorr_fmatchedstrong_nocl	Terra	All	271	77	10	3	0.8	0.65	54/ 45/ 00	28/ 66/ 05	10/ 80/ 10	00/ 33/ 66	47/ 50/ 02	0.064	0.08 + 0.22*tau	****** + *******tau	****** + *******tau	****** + *******tau	-1	-1	-1.00-	-999	-999	999
4	albcorr_fclimweak	Terra	All	316	161	25	8	0.83	0.65	44/ 54/ 00	24/ 68/ 06	16/ 64/ 20	00/ 50/ 50	36/ 59/ 04	0.057	0.04 + 0.26*tau	****** + *******tau	0.07 + 0.13*tau	****** + *******tau	-1	-1	-1.00-	-999	-999	999
4	albcorr_fclimweak_nocloud	Terra	All	304	125	20	8	0.83	0.69	47/ 51/ 00	25/ 68/ 06	20/ 60/ 20	00/ 25/ 75	39/ 56/ 04	0.058	0.05 + 0.25*tau	****** + *******tau	0.05 + 0.16*tau	****** + *******tau	-1	-1	-1.00-	-999	-999	999
4	albcorr_fclimstrong	Terra	All	289	101	17	6	0.85	0.71	48/ 51/ 00	29/ 62/ 07	17/ 76/ 05	00/ 66/ 33	41/ 55/ 02	0.059	0.04 + 0.29*tau	****** + *******tau	0.08 + 0.08*tau	****** + *******tau	-1	-1	-1.00-	-999	-999	999
4	albcorr_fclimstrong_nocloud	Terra	All	247	68	12	6	0.82	0.7	51/ 48/ 00	27/ 69/ 02	25/ 66/ 08	00/ 50/ 50	44/ 53/ 02	0.061	0.07 + 0.21*tau	****** + *******tau	****** + *******tau	****** + *******tau	-1	-1	-1.00-	-999	-999	999
4	corr1_fclimweak	Terra	All	304	159	30	11	0.91	0.59	44/ 53/ 01	17/ 70/ 11	10/ 70/ 20	09/ 09/ 81	33/ 59/ 07	0.059	0.03 + 0.27*tau	****** + *******tau	0.06 + 0.12*tau	****** + *******tau	-1	-1	-1	0.629	0.31	0.31
4	corr1_fclimweak_nocloud	Terra	All	293	124	24	11	0.9	0.63	45/ 53/ 01	19/ 69/ 11	12/ 66/ 20	09/ 18/ 72	35/ 57/ 06	0.06	0.03 + 0.28*tau	****** + *******tau	0.07 + 0.11*tau	****** + *******tau	-1	-1	-1	0.755	0.303	0.303
4	corr1_fclimstrong	Terra	All	280	106	18	8	0.91	0.64	47/ 52/ 00	16/ 69/ 13	11/ 72/ 16	00/ 50/ 50	37/ 57/ 05	0.061	0.06 + 0.24*tau	****** + *******tau	0.06 + 0.12*tau	****** + *******tau	-1	-1	-1.00-	-999	-999	999
4	corr1_fclimstrong_nocloud	Terra	All	243	69	13	7	0.88	0.65	51/ 48/ 00	18/ 73/ 07	15/ 69/ 15	00/ 42/ 57	41/ 54/ 03	0.062	0.05 + 0.26*tau	****** + *******tau	****** + *******tau	****** + *******tau	-1	-1	-1.00-	-999	-999	999
4	corr2_fmatchedweak	Terra	All	315	154	25	11	0.88	0.56	47/ 51/ 01	20/ 66/ 12	08/ 72/ 20	09/ 36/ 54	36/ 56/ 06	0.062	0.04 + 0.27*tau	****** + *******tau	0.06 + 0.12*tau	****** + *******tau	-1	-1	-1	0.637	0.296	0.296
4	corr2_fmatchedweak_nocloud	Terra	All	299	115	24	11	0.89	0.61	50/ 48/ 01	17/ 70/ 12	12/ 62/ 25	09/ 36/ 54	38/ 54/ 06	0.063	0.05 + 0.25*tau	****** + *******tau	0.06 + 0.12*tau	****** + *******tau	-1	-1	-1	0.737	0.308	0.308
4	corr2_fmatchedstrong	Terra	All	293	116	16	6	0.87	0.64	50/ 49/ 00	19/ 64/ 15	18/ 81/ 00	00/ 33/ 66	40/ 54/ 05	0.063	0.07 + 0.21*tau	****** + *******tau	0.10 + 0.02*tau	****** + *******tau	-1	-1	-1.00-	-999	-999	999
4	corr2_fmatchedstrong_noclou	Terra	All	266	77	14	4	0.86	0.69	54/ 44/ 00	20/ 66/ 12	21/ 78/ 00	00/ 25/ 75	45/ 50/ 03	0.064	0.08 + 0.21*tau	****** + *******tau	0.07 + 0.10*tau	****** + *******tau	-1	-1	-1.00-	-999	-999	999
4	raw_nobuddy	Aqua	All	467	453	68	9	0.91	0.58	24/ 72/ 03	15/ 62/ 21	05/ 66/ 27	00/ 44/ 55	18/ 67/ 13	0.079	0.03 + 0.22*tau	****** + *******tau	0.08 + 0.10*tau	****** + *******tau	-1	-1	-1.00-	-999	-999	999
4	raw_nosdcheck	Aqua	All	462	433	66	9	0.91	0.58	25/ 71/ 03	16/ 64/ 19	04/ 63/ 31	00/ 44/ 55	19/ 67/ 12	0.076	0.03 + 0.22*tau	****** + *******tau	0.08 + 0.10*tau	****** + *******tau	-1	-1	-1.00-	-999	-999	999
4	raw	Aqua	All	379	380	56	8	0.91	0.61	29/ 67/ 02	16/ 64/ 19	05/ 66/ 28	00/ 62/ 37	21/ 66/ 12	0.076	0.04 + 0.20*tau	****** + *******tau	0.06 + 0.13*tau	****** + *******tau	-1	-1	-1.00-	-999	-999	999
4	raw_fqa	Aqua	All	278	121	26	3	0.86	0.65	40/ 57/ 02	20/ 70/ 09	11/ 76/ 11	00/ 66/ 33	32/ 62/ 04	0.072	0.04 + 0.23*tau	****** + *******tau	0.05 + 0.16*tau	****** + *******tau	-1	-1	-1.00-	-999	-999	999
4	raw_fqa_nocloud	Aqua	All	239	84	23	3	0.86	0.7	41/ 56/ 01	17/ 77/ 04	13/ 69/ 17	00/ 66/ 33	33/ 62/ 03	0.072	0.06 + 0.17*tau	****** + *******tau	0.03 + 0.18*tau	****** + *******tau	-1	-1	-1.00-	-999	-999	999
4	nocorr_fmatchedweak	Aqua	All	277	123	24	2	0.83	0.7	40/ 57/ 02	21/ 69/ 08	12/ 75/ 12	00/ 50/ 50	33/ 61/ 04	0.072	0.04 + 0.22*tau	****** + *******tau	0.06 + 0.15*tau	****** + *******tau	-1	-1	-1.00-	-999	-999	999
4	nocorr_fmatchedweak_nocloud	Aqua	All	238	86	21	2	0.83	0.76	41/ 56/ 01	17/ 76/ 05	14/ 76/ 09	00/ 50/ 50	33/ 62/ 03	0.072	0.04 + 0.24*tau	****** + *******tau	0.04 + 0.17*tau	****** + *******tau	-1	-1	-1.00-	-999	-999	999
4	nocorr_fmatchedstrong	Aqua	All	259	95	19	1	0.81	0.73	52/ 46/ 01	20/ 73/ 06	15/ 73/ 10	00/ 00/100	41/ 54/ 03	0.073	0.05 + 0.24*tau	****** + *******tau	0.06 + 0.15*tau	****** + *******tau	-1	-1	-1.00-	-999	-999	999
4	nocorr_fmatchedstrong_noclo	Aqua	All	214	56	17	1	0.78	0.76	53/ 46/ 00	25/ 71/ 03	17/ 70/ 11	00/ 00/100	45/ 52/ 02	0.075	0.04 + 0.28*tau	****** + *******tau	****** + *******tau	****** + *******tau	-1	-1	-1.00-	-999	-999	999
4	nocorr_fclimweak	Aqua	All	274	119	26	3	0.84	0.67	39/ 58/ 02	23/ 68/ 08	11/ 80/ 07	00/ 66/ 33	33/ 62/ 04	0.072	0.05 + 0.19*tau	****** + *******tau	0.08 + 0.08*tau	****** + *******tau	-1	-1	-1.00-	-999	-999	999
4	nocorr_fclimweak_nocloud	Aqua	All	234	83	21	3	0.84	0.73	41/ 56/ 01	20/ 74/ 04	14/ 71/ 14	00/ 66/ 33	34/ 61/ 03	0.072	0.07 + 0.16*tau	****** + *******tau	0.07 + 0.07*tau	****** + *******tau	-1	-1	-1.00-	-999	-999	999
4	nocorr_fclimstrong	Aqua	All	250	81	20	3	0.86	0.7	53/ 45/ 01	20/ 70/ 08	15/ 60/ 25	00/ 66/ 33	43/ 52/ 04	0.075	0.06 + 0.22*tau	****** + *******tau	0.04 + 0.20*tau	****** + *******tau	-1	-1	-1.00-	-999	-999	999
4	nocorr_fclimstrong_nocloud	Aqua	All	201	48	16	3	0.85	0.72	55/ 44/ 00	22/ 70/ 06	12/ 68/ 18	00/ 66/ 33	46/ 50/ 02	0.077	0.10 + 0.12*tau	****** + *******tau	****** + *******tau	****** + *******tau	-1	-1	-1.00-	-999	-999	999
4	albcorr_fmatchedweak	Aqua	All	253	145	26	2	0.84	0.7	31/ 66/ 01	17/ 71/ 11	11/ 73/ 15	00/ 50/ 50	25/ 68/ 06	0.062	0.03 + 0.23*tau	****** + *******tau	0.05 + 0.15*tau	****** + *******tau	-1	-1	-1.00-	-999	-999	999
4	albcorr_fmatchedweak_noclou	Aqua	All	225	99	22	2	0.84	0.75	30/ 68/ 00	16/ 76/ 07	13/ 77/ 09	00/ 50/ 50	25/ 71/ 03	0.058	0.05 + 0.18*tau	****** + *******tau	0.04 + 0.17*tau	****** + *******tau	-1	-1	-1.00-	-999	-999	999
4	albcorr_fmatchedstrong	Aqua	All	230	129	19	1	0.82	0.69	31/ 66/ 01	20/ 69/ 10	15/ 73/ 10	00/ 00/100	26/ 68/ 05	0.058	0.02 + 0.29*tau	****** + *******tau	0.04 + 0.20*tau	****** + *******tau	-1	-1	-1.00-	-999	-999	999
4	albcorr_fmatchedstrong_nocl	Aqua	All	196	75	17	1	0.8	0.76	32/ 67/ 00	16/ 77/ 06	17/ 70/ 11	00/ 00/100	26/ 69/ 03	0.056	0.02 + 0.30*tau	****** + *******tau	0.03 + 0.20*tau	****** + *******tau	-1	-1	-1.00-	-999	-999	999
4	albcorr_fclimweak	Aqua	All	245	147	27	3	0.88	0.69	25/ 71/ 02	16/ 70/ 12	11/ 66/ 22	00/ 66/ 33	21/ 70/ 07	0.062	0.04 + 0.20*tau	****** + *******tau	0.06 + 0.10*tau	****** + *******tau	-1	-1	-1.00-	-999	-999	999
4	albcorr_fclimweak_nocloud	Aqua	All	219	96	25	3	0.87	0.72	26/ 69/ 03	16/ 77/ 06	12/ 68/ 20	00/ 66/ 33	22/ 71/ 05	0.056	0.06 + 0.13*tau	****** + *******tau	0.03 + 0.17*tau	****** + *******tau	-1	-1	-1.00-	-999	-999	999
4	albcorr_fclimstrong	Aqua	All	210	116	22	3	0.9	0.71	26/ 70/ 02	14/ 75/ 10	13/ 45/ 40	00/ 66/ 33	21/ 70/ 07	0.057	0.05 + 0.19*tau	****** + *******tau	0.03 + 0.18*tau	****** + *******tau	-1	-1	-1.00-	-999	-999	999
4	albcorr_fclimstrong_nocloud	Aqua	All	179	74	17	3	0.9	0.74	29/ 69/ 01	13/ 78/ 08	11/ 64/ 23	00/ 66/ 33	23/ 71/ 05	0.056	0.05 + 0.18*tau	****** + *******tau	0.01 + 0.22*tau	****** + *******tau	-1	-1	-1.00-	-999	-999	999
4	corr1_fclimweak	Aqua	All	245	147	27	3	0.88	0.69	25/ 71/ 02	16/ 70/ 12	11/ 66/ 22	00/ 66/ 33	21/ 70/ 07	0.062	0.04 + 0.20*tau	****** + *******tau	0.06 + 0.10*tau	****** + *******tau	-1	-1	-1.00-	-999	-999	999
4	corr1_fclimweak_nocloud	Aqua	All	219	96	25	3	0.87	0.72	26/ 69/ 03	16/ 77/ 06	12/ 68/ 20	00/ 66/ 33	22/ 71/ 05	0.056	0.06 + 0.13*tau	****** + *******tau	0.03 + 0.17*tau	****** + *******tau	-1	-1	-1.00-	-999	-999	999
4	corr1_fclimstrong	Aqua	All	210	116	22	3	0.9	0.71	26/ 70/ 02	14/ 75/ 10	13/ 45/ 40	00/ 66/ 33	21/ 70/ 07	0.057	0.05 + 0.19*tau	****** + *******tau	0.03 + 0.18*tau	****** + *******tau	-1	-1	-1.00-	-999	-999	999
4	corr1_fclimstrong_nocloud	Aqua	All	179	74	17	3	0.9	0.74	29/ 69/ 01	13/ 78/ 08	11/ 64/ 23	00/ 66/ 33	23/ 71/ 05	0.056	0.05 + 0.18*tau	****** + *******tau	0.01 + 0.22*tau	****** + *******tau	-1	-1	-1.00-	-999	-999	999
4	corr2_fmatchedweak	Aqua	All	253	145	26	2	0.84	0.7	31/ 66/ 01	17/ 71/ 11	11/ 73/ 15	00/ 50/ 50	25/ 68/ 06	0.062	0.03 + 0.23*tau	****** + *******tau	0.05 + 0.15*tau	****** + *******tau	-1	-1	-1.00-	-999	-999	999
4	corr2_fmatchedweak_nocloud	Aqua	All	225	99	22	2	0.84	0.75	30/ 68/ 00	16/ 76/ 07	13/ 77/ 09	00/ 50/ 50	25/ 71/ 03	0.058	0.05 + 0.18*tau	****** + *******tau	0.04 + 0.17*tau	****** + *******tau	-1	-1	-1.00-	-999	-999	999
4	corr2_fmatchedstrong	Aqua	All	230	129	19	1	0.82	0.69	31/ 66/ 01	20/ 69/ 10	15/ 73/ 10	00/ 00/100	26/ 68/ 05	0.058	0.02 + 0.29*tau	****** + *******tau	0.04 + 0.20*tau	****** + *******tau	-1	-1	-1.00-	-999	-999	999
4	corr2_fmatchedstrong_noclou	Aqua	All	196	75	17	1	0.8	0.76	32/ 67/ 00	16/ 77/ 06	17/ 70/ 11	00/ 00/100	26/ 69/ 03	0.056	0.02 + 0.30*tau	****** + *******tau	0.03 + 0.20*tau	****** + *******tau	-1	-1	-1.00-	-999	-999	999
5	raw_nobuddy	Terra	All	1515	366	180	106	1.01	0.75	29/ 66/ 04	04/ 72/ 22	03/ 66/ 30	00/ 50/ 50	21/ 66/ 11	0.072	0.00 + 0.27*tau	****** + *******tau	0.03 + 0.17*tau	-0.53 + 0.49*tau	-1	-1	-1	0.783	0.406	0.605
5	raw_nosdcheck	Terra	All	1517	352	181	106	1.01	0.74	29/ 67/ 03	05/ 73/ 21	03/ 65/ 30	00/ 50/ 50	21/ 67/ 11	0.072	0.01 + 0.25*tau	****** + *******tau	0.03 + 0.16*tau	-0.57 + 0.51*tau	-1	-1	-1	0.805	0.392	0.613
5	raw	Terra	All	1360	337	176	102	1.01	0.74	25/ 71/ 03	05/ 74/ 19	03/ 65/ 30	00/ 50/ 49	18/ 70/ 11	0.068	0.01 + 0.25*tau	****** + *******tau	0.02 + 0.18*tau	-0.61 + 0.53*tau	-1	-1	-1	0.756	0.422	0.606
5	raw_fqa	Terra	All	1060	226	141	86	1.01	0.78	30/ 68/ 01	08/ 80/ 11	03/ 67/ 29	04/ 43/ 52	23/ 68/ 08	0.066	0.01 + 0.25*tau	****** + *******tau	0.02 + 0.16*tau	****** + *******tau	-1	-1	-1	0.758	0.381	0.381
5	raw_fqa_nocloud	Terra	All	977	208	138	77	0.99	0.78	34/ 64/ 01	12/ 79/ 08	03/ 68/ 28	03/ 42/ 53	26/ 65/ 07	0.068	0.00 + 0.27*tau	****** + *******tau	0.03 + 0.14*tau	****** + *******tau	-1	-1	-1	0.793	0.352	0.352
5	nocorr_fmatchedweak	Terra	All	1037	222	138	74	1	0.79	30/ 68/ 01	09/ 80/ 10	04/ 67/ 28	02/ 44/ 52	23/ 69/ 07	0.066	-0.01 + 0.31*tau	****** + *******tau	0.03 + 0.15*tau	****** + *******tau	-1	-1	-1	0.804	0.354	0.354
5	nocorr_fmatchedweak_nocloud	Terra	All	953	202	134	69	0.98	0.77	34/ 64/ 00	11/ 79/ 08	05/ 66/ 28	01/ 44/ 53	26/ 65/ 07	0.068	-0.01 + 0.31*tau	****** + *******tau	0.03 + 0.15*tau	****** + *******tau	-1	-1	-1	0.843	0.367	0.367
5	nocorr_fmatchedstrong	Terra	All	854	204	111	54	1.01	0.78	35/ 63/ 01	09/ 80/ 09	03/ 69/ 27	07/ 50/ 42	26/ 66/ 06	0.069	-0.02 + 0.31*tau	****** + *******tau	0.02 + 0.15*tau	****** + *******tau	-1	-1	-1	0.729	0.351	0.351
5	nocorr_fmatchedstrong_noclo	Terra	All	796	186	104	47	0.99	0.75	39/ 59/ 00	13/ 80/ 05	04/ 67/ 27	08/ 53/ 38	30/ 63/ 05	0.071	0.02 + 0.22*tau	****** + *******tau	0.02 + 0.15*tau	****** + *******tau	-1	-1	-1	0.771	0.359	0.359
5	nocorr_fclimweak	Terra	All	1041	210	120	68	1.02	0.79	30/ 68/ 01	10/ 79/ 10	01/ 67/ 30	01/ 44/ 54	23/ 68/ 07	0.066	0.02 + 0.23*tau	****** + *******tau	0.03 + 0.14*tau	****** + *******tau	-1	-1	-1	0.767	0.342	0.342
5	nocorr_fclimweak_nocloud	Terra	All	947	189	114	62	0.99	0.79	35/ 63/ 01	11/ 81/ 07	02/ 67/ 29	00/ 43/ 56	27/ 65/ 07	0.068	0.01 + 0.25*tau	****** + *******tau	0.03 + 0.14*tau	****** + *******tau	-1	-1	-1	0.796	0.346	0.346
5	nocorr_fclimstrong	Terra	All	815	166	73	36	1.01	0.8	36/ 63/ 00	09/ 83/ 07	05/ 69/ 24	00/ 50/ 50	28/ 66/ 04	0.07	-0.01 + 0.33*tau	****** + *******tau	0.03 + 0.12*tau	****** + *******tau	-1	-1	-1	0.854	0.304	0.304
5	nocorr_fclimstrong_nocloud	Terra	All	762	148	69	33	1	0.8	40/ 59/ 00	09/ 85/ 04	04/ 71/ 24	00/ 51/ 48	32/ 63/ 04	0.072	-0.10 + 0.55*tau	****** + *******tau	0.04 + 0.11*tau	****** + *******tau	-1	-1	-1	0.869	0.295	0.295
5	albcorr_fmatchedweak	Terra	All	1001	263	138	74	1.01	0.81	15/ 83/ 01	05/ 82/ 12	04/ 67/ 28	02/ 44/ 52	11/ 79/ 08	0.052	-0.03 + 0.32*tau	****** + *******tau	0.02 + 0.16*tau	****** + *******tau	-1	-1	-1	0.804	0.37	0.37
5	albcorr_fmatchedweak_noclou	Terra	All	923	237	133	69	0.99	0.79	15/ 83/ 01	05/ 84/ 09	05/ 66/ 28	01/ 44/ 53	11/ 79/ 08	0.05	-0.03 + 0.32*tau	****** + *******tau	0.01 + 0.17*tau	****** + *******tau	-1	-1	-1	0.843	0.382	0.382
5	albcorr_fmatchedstrong	Terra	All	815	249	113	54	1.03	0.81	14/ 82/ 02	04/ 82/ 12	03/ 69/ 27	07/ 50/ 42	11/ 79/ 08	0.05	-0.00 + 0.26*tau	****** + *******tau	0.03 + 0.13*tau	****** + *******tau	-1	-1	-1	0.729	0.302	0.302
5	albcorr_fmatchedstrong_nocl	Terra	All	762	224	106	47	1.01	0.78	15/ 82/ 01	05/ 85/ 08	04/ 66/ 28	08/ 53/ 38	12/ 80/ 07	0.049	-0.04 + 0.35*tau	****** + *******tau	0.01 + 0.17*tau	****** + *******tau	-1	-1	-1	0.771	0.384	0.384
5	albcorr_fclimweak	Terra	All	994	260	123	69	1.07	0.81	12/ 85/ 02	04/ 81/ 13	00/ 65/ 34	01/ 40/ 57	09/ 80/ 09	0.049	-0.04 + 0.36*tau	****** + *******tau	0.01 + 0.18*tau	****** + *******tau	-1	-1	-1	0.78	0.411	0.411
5	albcorr_fclimweak_nocloud	Terra	All	904	231	118	64	1.04	0.81	12/ 85/ 02	05/ 83/ 10	01/ 66/ 31	00/ 42/ 57	09/ 81/ 09	0.047	-0.05 + 0.38*tau	****** + *******tau	0.01 + 0.17*tau	****** + *******tau	-1	-1	-1	0.802	0.387	0.387
5	albcorr_fclimstrong	Terra	All	767	215	80	37	1.05	0.8	12/ 85/ 02	05/ 80/ 13	01/ 70/ 28	00/ 51/ 48	09/ 82/ 08	0.047	-0.02 + 0.33*tau	****** + *******tau	0.02 + 0.15*tau	****** + *******tau	-1	-1	-1	0.864	0.356	0.356
5	albcorr_fclimstrong_nocloud	Terra	All	716	195	75	34	1.05	0.8	13/ 84/ 01	06/ 81/ 12	01/ 69/ 29	00/ 50/ 50	10/ 81/ 07	0.046	-0.04 + 0.37*tau	****** + *******tau	0.02 + 0.15*tau	****** + *******tau	-1	-1	-1	0.88	0.365	0.365
5	corr1_fclimweak	Terra	All	994	260	151	41	1	0.83	12/ 85/ 02	04/ 81/ 13	03/ 67/ 28	17/ 56/ 26	10/ 81/ 07	0.049	0.03 + 0.19*tau	****** + *******tau	0.02 + 0.17*tau	****** + *******tau	-1	-1	-1	0.559	0.344	0.344
5	corr1_fclimweak_nocloud	Terra	All	904	231	144	38	0.99	0.82	12/ 85/ 02	05/ 83/ 10	04/ 69/ 26	18/ 52/ 28	10/ 82/ 07	0.047	0.02 + 0.20*tau	****** + *******tau	0.02 + 0.16*tau	****** + *******tau	-1	-1	-1	0.59	0.337	0.337
5	corr1_fclimstrong	Terra	All	767	215	95	22	0.99	0.82	12/ 85/ 02	05/ 80/ 13	04/ 70/ 25	13/ 63/ 22	10/ 82/ 07	0.047	0.02 + 0.18*tau	****** + *******tau	0.01 + 0.17*tau	****** + *******tau	-1	-1	-1	0.682	0.353	0.353
5	corr1_fclimstrong_nocloud	Terra	All	716	195	88	21	1	0.82	13/ 84/ 01	06/ 81/ 12	03/ 71/ 25	14/ 61/ 23	10/ 82/ 06	0.046	0.02 + 0.20*tau	****** + *******tau	0.02 + 0.15*tau	****** + *******tau	-1	-1	-1	0.677	0.329	0.329
5	corr2_fmatchedweak	Terra	All	1001	263	167	45	0.95	0.82	15/ 83/ 01	05/ 82/ 12	07/ 68/ 24	22/ 55/ 22	12/ 80/ 06	0.052	0.04 + 0.15*tau	****** + *******tau	0.01 + 0.17*tau	****** + *******tau	-1	-1	-1	0.651	0.343	0.343
5	corr2_fmatchedweak_nocloud	Terra	All	923	237	160	42	0.95	0.81	15/ 83/ 01	05/ 84/ 09	06/ 68/ 24	23/ 52/ 23	12/ 80/ 06	0.05	0.03 + 0.16*tau	****** + *******tau	0.01 + 0.16*tau	****** + *******tau	-1	-1	-1	0.688	0.335	0.335
5	corr2_fmatchedstrong	Terra	All	815	249	140	28	0.94	0.82	14/ 82/ 02	04/ 82/ 12	08/ 70/ 21	21/ 60/ 17	12/ 80/ 07	0.05	0.04 + 0.13*tau	****** + *******tau	0.01 + 0.18*tau	****** + *******tau	-1	-1	-1	0.667	0.361	0.361
5	corr2_fmatchedstrong_noclou	Terra	All	762	224	129	25	0.93	0.8	15/ 82/ 01	05/ 85/ 08	08/ 68/ 22	20/ 60/ 20	12/ 81/ 05	0.049	0.02 + 0.18*tau	****** + *******tau	0.01 + 0.17*tau	****** + *******tau	-1	-1	-1	0.696	0.349	0.349
5	raw_nobuddy	Aqua	All	1585	453	174	103	1.08	0.76	22/ 69/ 08	03/ 60/ 36	04/ 63/ 32	03/ 30/ 66	16/ 65/ 18	0.076	-0.01 + 0.33*tau	****** + *******tau	0.04 + 0.16*tau	0.04 + 0.27*tau	-1	-1	-1	0.749	0.382	0.617
5	raw_nosdcheck	Aqua	All	1577	438	167	103	1.08	0.76	23/ 68/ 07	03/ 62/ 34	03/ 63/ 32	03/ 30/ 66	17/ 65/ 17	0.074	-0.00 + 0.30*tau	****** + *******tau	0.04 + 0.16*tau	0.05 + 0.26*tau	-1	-1	-1	0.746	0.387	0.616
5	raw	Aqua	All	1447	398	158	97	1.08	0.76	20/ 72/ 07	04/ 63/ 32	02/ 63/ 33	04/ 31/ 63	15/ 68/ 16	0.07	-0.01 + 0.31*tau	****** + *******tau	0.03 + 0.17*tau	-0.16 + 0.36*tau	-1	-1	-1	0.735	0.397	0.613
5	raw_fqa	Aqua	All	861	189	98	60	1.04	0.81	31/ 65/ 02	04/ 80/ 15	02/ 77/ 20	06/ 38/ 55	23/ 67/ 08	0.07	0.02 + 0.22*tau	****** + *******tau	0.03 + 0.13*tau	****** + *******tau	-1	-1	-1	0.73	0.295	0.295
5	raw_fqa_nocloud	Aqua	All	741	158	88	54	1.04	0.83	37/ 61/ 00	05/ 84/ 10	02/ 76/ 21	03/ 42/ 53	27/ 65/ 06	0.072	0.03 + 0.20*tau	****** + *******tau	0.03 + 0.13*tau	****** + *******tau	-1	-1	-1	0.704	0.295	0.295
5	nocorr_fmatchedweak	Aqua	All	851	183	89	51	1.04	0.8	32/ 65/ 02	04/ 81/ 14	04/ 74/ 21	03/ 39/ 56	24/ 67/ 08	0.07	0.01 + 0.25*tau	****** + *******tau	0.04 + 0.11*tau	****** + *******tau	-1	-1	-1	0.774	0.268	0.268
5	nocorr_fmatchedweak_nocloud	Aqua	All	727	154	81	46	1.04	0.81	38/ 60/ 00	05/ 85/ 09	02/ 74/ 23	04/ 41/ 54	28/ 64/ 06	0.072	0.05 + 0.15*tau	****** + *******tau	0.02 + 0.13*tau	****** + *******tau	-1	-1	-1	0.737	0.314	0.314
5	nocorr_fmatchedstrong	Aqua	All	675	158	75	39	1.03	0.78	37/ 61/ 01	06/ 82/ 10	04/ 69/ 26	02/ 41/ 56	28/ 64/ 06	0.074	0.01 + 0.22*tau	****** + *******tau	0.01 + 0.18*tau	****** + *******tau	-1	-1	-1	0.797	0.401	0.401
5	nocorr_fmatchedstrong_noclo	Aqua	All	600	137	63	32	1.02	0.81	43/ 55/ 00	08/ 81/ 10	03/ 73/ 23	03/ 43/ 53	33/ 60/ 06	0.077	0.06 + 0.11*tau	****** + *******tau	0.03 + 0.13*tau	****** + *******tau	-1	-1	-1	0.801	0.322	0.322
5	nocorr_fclimweak	Aqua	All	840	169	68	44	1.05	0.79	32/ 65/ 02	04/ 77/ 18	04/ 67/ 27	02/ 34/ 63	25/ 65/ 08	0.071	-0.00 + 0.29*tau	****** + *******tau	0.02 + 0.15*tau	****** + *******tau	-1	-1	-1	0.752	0.342	0.342
5	nocorr_fclimweak_nocloud	Aqua	All	721	132	62	37	1.06	0.81	38/ 60/ 00	04/ 83/ 12	01/ 69/ 29	00/ 37/ 62	29/ 63/ 06	0.072	0.03 + 0.22*tau	****** + *******tau	0.01 + 0.18*tau	****** + *******tau	-1	-1	-1	0.725	0.372	0.372
5	nocorr_fclimstrong	Aqua	All	625	116	47	17	1.05	0.81	40/ 59/ 00	04/ 83/ 12	04/ 70/ 25	00/ 35/ 64	32/ 62/ 05	0.075	0.04 + 0.16*tau	****** + *******tau	0.00 + 0.19*tau	****** + *******tau	-1	-1	-1	0.559	0.415	0.415
5	nocorr_fclimstrong_nocloud	Aqua	All	560	93	40	16	1.04	0.86	45/ 54/ 00	05/ 84/ 09	00/ 82/ 17	00/ 31/ 68	36/ 59/ 04	0.078	0.04 + 0.15*tau	****** + *******tau	0.02 + 0.13*tau	****** + *******tau	-1	-1	-1	0.578	0.31	0.31
5	albcorr_fmatchedweak	Aqua	All	814	224	89	51	1.04	0.81	14/ 82/ 02	04/ 76/ 18	03/ 75/ 21	03/ 39/ 56	11/ 79/ 09	0.056	-0.01 + 0.27*tau	****** + *******tau	0.04 + 0.11*tau	****** + *******tau	-1	-1	-1	0.774	0.27	0.27
5	albcorr_fmatchedweak_noclou	Aqua	All	697	189	81	46	1.05	0.82	16/ 82/ 01	05/ 80/ 13	01/ 75/ 23	04/ 41/ 54	12/ 79/ 07	0.055	0.03 + 0.18*tau	****** + *******tau	0.02 + 0.15*tau	****** + *******tau	-1	-1	-1	0.737	0.339	0.339
5	albcorr_fmatchedstrong	Aqua	All	636	204	75	39	1.05	0.8	14/ 82/ 02	04/ 76/ 18	02/ 70/ 26	02/ 41/ 56	11/ 78/ 10	0.058	-0.00 + 0.24*tau	****** + *******tau	0.03 + 0.14*tau	****** + *******tau	-1	-1	-1	0.797	0.34	0.34
5	albcorr_fmatchedstrong_nocl	Aqua	All	569	172	63	32	1.04	0.82	17/ 81/ 01	04/ 79/ 16	01/ 74/ 23	03/ 43/ 53	12/ 79/ 08	0.057	0.03 + 0.14*tau	****** + *******tau	0.03 + 0.13*tau	****** + *******tau	-1	-1	-1	0.801	0.327	0.327
5	albcorr_fclimweak	Aqua	All	803	203	78	44	1.1	0.8	11/ 85/ 03	03/ 75/ 20	03/ 62/ 33	00/ 36/ 63	09/ 80/ 10	0.054	-0.00 + 0.28*tau	****** + *******tau	0.01 + 0.18*tau	****** + *******tau	-1	-1	-1	0.775	0.386	0.386
5	albcorr_fclimweak_nocloud	Aqua	All	689	162	73	37	1.1	0.82	13/ 85/ 01	04/ 79/ 16	01/ 67/ 31	00/ 35/ 64	10/ 80/ 08	0.052	-0.00 + 0.26*tau	****** + *******tau	0.00 + 0.19*tau	****** + *******tau	-1	-1	-1	0.748	0.405	0.405
5	albcorr_fclimstrong	Aqua	All	592	149	48	20	1.09	0.81	10/ 86/ 02	04/ 73/ 22	04/ 64/ 31	00/ 30/ 70	09/ 81/ 09	0.055	0.02 + 0.21*tau	****** + *******tau	0.02 + 0.16*tau	****** + *******tau	-1	-1	-1	0.563	0.35	0.35
5	albcorr_fclimstrong_nocloud	Aqua	All	535	116	42	19	1.08	0.86	13/ 84/ 01	03/ 78/ 18	02/ 73/ 23	00/ 31/ 68	11/ 81/ 07	0.054	0.01 + 0.21*tau	****** + *******tau	0.03 + 0.12*tau	****** + *******tau	-1	-1	-1	0.576	0.27	0.27
5	corr1_fclimweak	Aqua	All	803	203	106	18	1.02	0.83	11/ 85/ 03	03/ 75/ 20	05/ 67/ 26	05/ 50/ 44	09/ 81/ 09	0.054	0.05 + 0.12*tau	****** + *******tau	0.02 + 0.16*tau	****** + *******tau	-1	-1	-1	0.531	0.348	0.348
5	corr1_fclimweak_nocloud	Aqua	All	689	162	97	15	1.03	0.85	13/ 85/ 01	04/ 79/ 16	03/ 72/ 24	06/ 53/ 40	10/ 82/ 06	0.052	0.05 + 0.12*tau	****** + *******tau	0.02 + 0.14*tau	****** + *******tau	-1	-1	-1	0.525	0.311	0.311
5	corr1_fclimstrong	Aqua	All	592	149	59	9	1.05	0.86	10/ 86/ 02	04/ 73/ 22	03/ 72/ 23	11/ 77/ 11	09/ 83/ 07	0.055	0.05 + 0.09*tau	****** + *******tau	0.04 + 0.11*tau	****** + *******tau	-1	-1	-1.00-	-999	-999	999
5	corr1_fclimstrong_nocloud	Aqua	All	535	116	51	10	1.04	0.88	13/ 84/ 01	03/ 78/ 18	01/ 78/ 19	10/ 80/ 10	11/ 83/ 05	0.054	0.06 + 0.07*tau	****** + *******tau	0.03 + 0.10*tau	****** + *******tau	-1	-1	-1.00-	-999	-999	999
5	corr2_fmatchedweak	Aqua	All	814	224	119	24	0.99	0.81	14/ 82/ 02	04/ 76/ 18	05/ 73/ 21	20/ 50/ 29	12/ 80/ 07	0.056	0.05 + 0.11*tau	****** + *******tau	0.01 + 0.17*tau	****** + *******tau	-1	-1	-1	0.618	0.362	0.362
5	corr2_fmatchedweak_nocloud	Aqua	All	697	190	106	22	0.99	0.82	16/ 82/ 01	05/ 80/ 13	03/ 76/ 19	22/ 54/ 22	13/ 80/ 05	0.055	0.06 + 0.09*tau	****** + *******tau	0.00 + 0.18*tau	****** + *******tau	-1	-1	-1	0.597	0.381	0.381
5	corr2_fmatchedstrong	Aqua	All	636	204	94	21	0.98	0.83	14/ 82/ 02	04/ 76/ 18	04/ 75/ 20	19/ 57/ 23	11/ 80/ 08	0.058	0.05 + 0.09*tau	****** + *******tau	0.03 + 0.13*tau	****** + *******tau	-1	-1	-1	0.654	0.296	0.296
5	corr2_fmatchedstrong_noclou	Aqua	All	569	172	75	21	1	0.85	17/ 81/ 01	04/ 79/ 16	02/ 80/ 17	19/ 61/ 19	13/ 80/ 06	0.057	0.06 + 0.07*tau	****** + *******tau	0.03 + 0.11*tau	****** + *******tau	-1	-1	-1	0.617	0.253	0.253
6	raw_nobuddy	Terra	All	2415	317	28	6	1.03	0.58	11/ 73/ 15	05/ 33/ 61	03/ 78/ 17	00/ 16/ 83	10/ 68/ 20	0.087	0.02 + 0.27*tau	****** + *******tau	0.15 + 0.05*tau	****** + *******tau	-1	-1	-1.00-	-999	-999	999
6	raw_nosdcheck	Terra	All	2408	312	28	6	1.03	0.59	11/ 73/ 14	05/ 33/ 60	03/ 78/ 17	00/ 16/ 83	10/ 68/ 20	0.085	0.01 + 0.29*tau	****** + *******tau	0.12 + 0.10*tau	****** + *******tau	-1	-1	-1.00-	-999	-999	999
6	raw	Terra	All	2259	300	28	6	1.02	0.59	10/ 74/ 15	06/ 33/ 60	03/ 78/ 17	00/ 16/ 83	09/ 69/ 20	0.085	-0.01 + 0.36*tau	****** + *******tau	0.14 + 0.06*tau	****** + *******tau	-1	-1	-1.00-	-999	-999	999
6	raw_fqa	Terra	All	1918	170	23	5	0.95	0.69	13/ 71/ 14	10/ 33/ 55	04/ 86/ 08	00/ 20/ 80	13/ 68/ 18	0.074	0.04 + 0.24*tau	****** + *******tau	0.15 + -0.02*tau	****** + *******tau	-1	-1	-1.00-	-999	-999	999
6	raw_fqa_nocloud	Terra	All	1817	139	20	5	0.94	0.72	15/ 71/ 13	12/ 33/ 53	05/ 85/ 10	00/ 20/ 80	14/ 68/ 16	0.071	0.03 + 0.28*tau	****** + *******tau	0.16 + -0.03*tau	****** + *******tau	-1	-1	-1.00-	-999	-999	999
6	nocorr_fmatchedweak	Terra	All	1915	168	23	5	0.95	0.68	13/ 71/ 14	11/ 33/ 54	04/ 86/ 08	00/ 20/ 80	13/ 68/ 17	0.074	0.04 + 0.24*tau	****** + *******tau	0.16 + -0.02*tau	****** + *******tau	-1	-1	-1.00-	-999	-999	999
6	nocorr_fmatchedweak_nocloud	Terra	All	1811	138	20	5	0.94	0.71	15/ 71/ 13	13/ 33/ 53	05/ 85/ 10	00/ 20/ 80	14/ 68/ 16	0.071	-0.01 + 0.40*tau	****** + *******tau	0.16 + -0.03*tau	****** + *******tau	-1	-1	-1.00-	-999	-999	999
6	nocorr_fmatchedstrong	Terra	All	1283	78	9	0	0.85	0.65	22/ 75/ 01	23/ 64/ 12	22/ 55/ 22	00/ 00/ 00	22/ 75/ 02	0.056	0.05 + 0.22*tau	****** + *******tau	****** + *******tau	****** + *******tau	-1	-1	-1.00-	-999	-999	999
6	nocorr_fmatchedstrong_noclo	Terra	All	1207	65	7	0	0.84	0.67	24/ 74/ 00	26/ 64/ 09	28/ 57/ 14	00/ 00/ 00	24/ 73/ 01	0.057	0.08 + 0.16*tau	****** + *******tau	****** + *******tau	****** + *******tau	-1	-1	-1.00-	-999	-999	999
6	nocorr_fclimweak	Terra	All	1894	170	23	5	0.95	0.69	14/ 70/ 14	11/ 32/ 55	04/ 86/ 08	00/ 20/ 80	14/ 67/ 18	0.074	0.06 + 0.17*tau	****** + *******tau	0.16 + -0.02*tau	****** + *******tau	-1	-1	-1.00-	-999	-999	999
6	nocorr_fclimweak_nocloud	Terra	All	1785	140	20	5	0.94	0.72	16/ 70/ 13	12/ 32/ 55	05/ 85/ 10	00/ 20/ 80	15/ 67/ 16	0.072	0.03 + 0.27*tau	****** + *******tau	0.13 + 0.02*tau	****** + *******tau	-1	-1	-1.00-	-999	-999	999
6	nocorr_fclimstrong	Terra	All	1175	69	8	1	0.81	0.61	25/ 73/ 00	21/ 65/ 13	25/ 62/ 12	00/100/ 00	25/ 73/ 01	0.058	0.06 + 0.20*tau	****** + *******tau	****** + *******tau	****** + *******tau	-1	-1	-1.00-	-999	-999	999
6	nocorr_fclimstrong_nocloud	Terra	All	1112	57	6	1	0.8	0.59	26/ 72/ 00	28/ 63/ 08	16/ 66/ 16	00/100/ 00	26/ 72/ 00	0.059	0.06 + 0.22*tau	****** + *******tau	****** + *******tau	****** + *******tau	-1	-1	-1.00-	-999	-999	999
6	albcorr_fmatchedweak	Terra	All	1933	160	23	5	0.96	0.72	06/ 80/ 12	09/ 52/ 38	04/ 86/ 08	00/ 20/ 80	06/ 78/ 14	0.06	0.02 + 0.26*tau	****** + *******tau	0.11 + 0.03*tau	****** + *******tau	-1	-1	-1.00-	-999	-999	999
6	albcorr_fmatchedweak_noclou	Terra	All	1831	129	20	5	0.94	0.74	06/ 81/ 11	10/ 58/ 31	05/ 85/ 10	00/ 20/ 80	07/ 80/ 12	0.056	-0.04 + 0.42*tau	****** + *******tau	0.10 + 0.03*tau	****** + *******tau	-1	-1	-1.00-	-999	-999	999
6	albcorr_fmatchedstrong	Terra	All	1266	104	9	0	0.89	0.67	09/ 87/ 02	13/ 71/ 15	22/ 55/ 22	00/ 00/ 00	09/ 86/ 03	0.042	0.03 + 0.24*tau	****** + *******tau	0.02 + 0.20*tau	****** + *******tau	-1	-1	-1.00-	-999	-999	999
6	albcorr_fmatchedstrong_nocl	Terra	All	1193	90	7	0	0.87	0.69	10/ 87/ 01	13/ 74/ 12	28/ 57/ 14	00/ 00/ 00	10/ 86/ 02	0.041	0.04 + 0.21*tau	****** + *******tau	0.02 + 0.20*tau	****** + *******tau	-1	-1	-1.00-	-999	-999	999
6	albcorr_fclimweak	Terra	All	1889	186	24	5	0.99	0.72	05/ 79/ 15	06/ 52/ 41	04/ 87/ 08	00/ 20/ 80	05/ 76/ 17	0.063	-0.09 + 0.56*tau	****** + *******tau	0.09 + 0.07*tau	****** + *******tau	-1	-1	-1.00-	-999	-999	999
6	albcorr_fclimweak_nocloud	Terra	All	1778	153	22	5	0.97	0.75	05/ 79/ 14	07/ 53/ 39	04/ 86/ 09	00/ 20/ 80	05/ 77/ 16	0.059	-0.00 + 0.30*tau	****** + *******tau	0.10 + 0.03*tau	****** + *******tau	-1	-1	-1.00-	-999	-999	999
6	albcorr_fclimstrong	Terra	All	1144	105	8	1	0.88	0.65	07/ 90/ 02	08/ 74/ 17	12/ 75/ 12	00/100/ 00	07/ 88/ 03	0.041	0.04 + 0.20*tau	****** + *******tau	0.00 + 0.26*tau	****** + *******tau	-1	-1	-1.00-	-999	-999	999
6	albcorr_fclimstrong_nocloud	Terra	All	1083	88	7	1	0.86	0.65	08/ 90/ 01	11/ 75/ 13	14/ 71/ 14	00/100/ 00	08/ 89/ 02	0.039	0.03 + 0.22*tau	****** + *******tau	0.03 + 0.19*tau	****** + *******tau	-1	-1	-1.00-	-999	-999	999
6	corr1_fclimweak	Terra	All	1879	192	26	5	1.04	0.72	05/ 79/ 15	03/ 52/ 44	00/ 73/ 26	00/ 20/ 80	04/ 76/ 18	0.065	0.02 + 0.22*tau	****** + *******tau	0.10 + 0.08*tau	****** + *******tau	-1	-1	-1.00-	-999	-999	999
6	corr1_fclimweak_nocloud	Terra	All	1768	160	25	5	1.02	0.74	05/ 80/ 14	05/ 53/ 41	00/ 76/ 24	00/ 20/ 80	05/ 77/ 16	0.061	-0.02 + 0.35*tau	****** + *******tau	0.09 + 0.07*tau	****** + *******tau	-1	-1	-1.00-	-999	-999	999
6	corr1_fclimstrong	Terra	All	1139	109	9	1	0.93	0.66	07/ 90/ 02	05/ 75/ 19	11/ 77/ 11	00/100/ 00	07/ 88/ 03	0.042	0.05 + 0.16*tau	****** + *******tau	0.01 + 0.22*tau	****** + *******tau	-1	-1	-1.00-	-999	-999	999
6	corr1_fclimstrong_nocloud	Terra	All	1078	91	9	1	0.91	0.66	08/ 90/ 01	07/ 76/ 15	11/ 77/ 11	00/100/ 00	08/ 89/ 02	0.039	0.04 + 0.18*tau	****** + *******tau	0.01 + 0.23*tau	****** + *******tau	-1	-1	-1.00-	-999	-999	999
6	corr2_fmatchedweak	Terra	All	1919	173	24	5	1.01	0.72	06/ 81/ 12	05/ 54/ 40	04/ 75/ 20	00/ 20/ 80	06/ 78/ 14	0.061	0.00 + 0.29*tau	****** + *******tau	0.10 + 0.07*tau	****** + *******tau	-1	-1	-1.00-	-999	-999	999
6	corr2_fmatchedweak_nocloud	Terra	All	1816	142	22	5	0.99	0.74	07/ 81/ 11	06/ 56/ 37	04/ 72/ 22	00/ 20/ 80	06/ 79/ 13	0.057	-0.06 + 0.48*tau	****** + *******tau	0.10 + 0.06*tau	****** + *******tau	-1	-1	-1.00-	-999	-999	999
6	corr2_fmatchedstrong	Terra	All	1259	109	10	1	0.91	0.65	09/ 88/ 02	07/ 76/ 16	10/ 70/ 20	00/ 00/100	09/ 86/ 03	0.042	0.03 + 0.22*tau	****** + *******tau	0.01 + 0.24*tau	****** + *******tau	-1	-1	-1.00-	-999	-999	999
6	corr2_fmatchedstrong_noclou	Terra	All	1187	94	8	1	0.88	0.67	10/ 88/ 01	09/ 75/ 14	12/ 75/ 12	00/ 00/100	10/ 86/ 02	0.041	0.04 + 0.19*tau	****** + *******tau	0.03 + 0.17*tau	****** + *******tau	-1	-1	-1.00-	-999	-999	999
6	raw_nobuddy	Aqua	All	2155	409	38	10	1.01	0.5	11/ 72/ 16	04/ 31/ 64	05/ 68/ 26	00/ 20/ 80	10/ 65/ 24	0.097	0.04 + 0.22*tau	****** + *******tau	0.09 + 0.23*tau	****** + *******tau	-1	-1	-1.00-	-999	-999	999
6	raw_nosdcheck	Aqua	All	2150	393	38	10	1.01	0.5	11/ 72/ 16	05/ 31/ 63	05/ 68/ 26	00/ 20/ 80	10/ 65/ 23	0.095	0.02 + 0.29*tau	****** + *******tau	0.09 + 0.21*tau	****** + *******tau	-1	-1	-1.00-	-999	-999	999
6	raw	Aqua	All	2066	366	35	10	1	0.52	10/ 73/ 16	04/ 31/ 63	05/ 71/ 22	00/ 20/ 80	09/ 66/ 23	0.093	0.03 + 0.28*tau	****** + *******tau	0.10 + 0.20*tau	****** + *******tau	-1	-1	-1.00-	-999	-999	999
6	raw_fqa	Aqua	All	1625	187	23	7	0.88	0.56	17/ 68/ 13	08/ 31/ 60	17/ 56/ 26	00/ 28/ 71	16/ 64/ 18	0.082	0.05 + 0.23*tau	****** + *******tau	0.10 + 0.20*tau	****** + *******tau	-1	-1	-1.00-	-999	-999	999
6	raw_fqa_nocloud	Aqua	All	1466	141	17	5	0.87	0.6	17/ 69/ 12	11/ 36/ 52	17/ 58/ 23	00/ 20/ 80	17/ 66/ 16	0.075	0.05 + 0.25*tau	****** + *******tau	0.10 + 0.16*tau	****** + *******tau	-1	-1	-1.00-	-999	-999	999
6	nocorr_fmatchedweak	Aqua	All	1624	186	23	7	0.88	0.56	17/ 68/ 13	08/ 31/ 60	17/ 56/ 26	00/ 28/ 71	16/ 64/ 18	0.082	0.05 + 0.24*tau	****** + *******tau	0.12 + 0.16*tau	****** + *******tau	-1	-1	-1.00-	-999	-999	999
6	nocorr_fmatchedweak_nocloud	Aqua	All	1463	138	17	5	0.87	0.6	17/ 69/ 12	11/ 35/ 52	17/ 58/ 23	00/ 20/ 80	17/ 66/ 16	0.075	0.05 + 0.25*tau	****** + *******tau	0.09 + 0.21*tau	****** + *******tau	-1	-1	-1.00-	-999	-999	999
6	nocorr_fmatchedstrong	Aqua	All	1097	73	12	2	0.76	0.56	25/ 72/ 01	21/ 61/ 16	33/ 50/ 16	00/ 00/100	25/ 71/ 02	0.059	0.05 + 0.28*tau	****** + *******tau	****** + *******tau	****** + *******tau	-1	-1	-1.00-	-999	-999	999
6	nocorr_fmatchedstrong_noclo	Aqua	All	992	50	10	1	0.76	0.65	27/ 71/ 01	32/ 62/ 06	30/ 60/ 10	00/ 00/100	27/ 71/ 01	0.06	0.02 + 0.41*tau	****** + *******tau	****** + *******tau	****** + *******tau	-1	-1	-1.00-	-999	-999	999
6	nocorr_fclimweak	Aqua	All	1594	184	22	7	0.87	0.56	18/ 68/ 13	08/ 30/ 61	18/ 68/ 13	00/ 28/ 71	17/ 64/ 18	0.083	0.06 + 0.23*tau	****** + *******tau	0.11 + 0.20*tau	****** + *******tau	-1	-1	-1.00-	-999	-999	999
6	nocorr_fclimweak_nocloud	Aqua	All	1440	136	16	5	0.86	0.59	18/ 68/ 12	12/ 34/ 52	18/ 62/ 18	00/ 20/ 80	18/ 65/ 16	0.076	0.06 + 0.24*tau	****** + *******tau	0.09 + 0.22*tau	****** + *******tau	-1	-1	-1.00-	-999	-999	999
6	nocorr_fclimstrong	Aqua	All	1011	58	9	0	0.72	0.49	27/ 71/ 01	27/ 60/ 12	44/ 33/ 22	00/ 00/ 00	27/ 70/ 01	0.058	0.07 + 0.26*tau	****** + *******tau	****** + *******tau	****** + *******tau	-1	-1	-1.00-	-999	-999	999
6	nocorr_fclimstrong_nocloud	Aqua	All	924	43	8	0	0.73	0.48	29/ 69/ 00	34/ 55/ 09	37/ 37/ 25	00/ 00/ 00	29/ 69/ 01	0.06	0.08 + 0.26*tau	****** + *******tau	****** + *******tau	****** + *******tau	-1	-1	-1.00-	-999	-999	999
6	albcorr_fmatchedweak	Aqua	All	1634	175	23	7	0.89	0.57	09/ 77/ 12	10/ 43/ 45	17/ 56/ 26	00/ 28/ 71	10/ 73/ 16	0.07	0.03 + 0.26*tau	****** + *******tau	0.07 + 0.22*tau	****** + *******tau	-1	-1	-1.00-	-999	-999	999
6	albcorr_fmatchedweak_noclou	Aqua	All	1478	128	17	5	0.87	0.61	10/ 78/ 11	14/ 49/ 36	17/ 58/ 23	00/ 20/ 80	10/ 75/ 13	0.061	0.03 + 0.27*tau	****** + *******tau	0.04 + 0.26*tau	****** + *******tau	-1	-1	-1.00-	-999	-999	999
6	albcorr_fmatchedstrong	Aqua	All	1074	98	12	2	0.8	0.62	12/ 85/ 02	17/ 62/ 20	33/ 50/ 16	00/ 00/100	13/ 82/ 04	0.047	0.03 + 0.26*tau	****** + *******tau	-0.01 + 0.35*tau	****** + *******tau	-1	-1	-1.00-	-999	-999	999
6	albcorr_fmatchedstrong_nocl	Aqua	All	977	68	10	1	0.79	0.69	13/ 84/ 02	26/ 64/ 08	30/ 60/ 10	00/ 00/100	14/ 83/ 02	0.045	0.01 + 0.36*tau	****** + *******tau	****** + *******tau	****** + *******tau	-1	-1	-1.00-	-999	-999	999
6	albcorr_fclimweak	Aqua	All	1579	201	22	7	0.92	0.6	07/ 76/ 16	08/ 41/ 49	18/ 59/ 22	00/ 28/ 71	07/ 71/ 20	0.074	0.02 + 0.26*tau	****** + *******tau	0.07 + 0.24*tau	****** + *******tau	-1	-1	-1.00-	-999	-999	999
6	albcorr_fclimweak_nocloud	Aqua	All	1430	146	19	5	0.9	0.63	08/ 77/ 13	10/ 47/ 42	15/ 68/ 15	00/ 20/ 80	08/ 74/ 16	0.064	0.03 + 0.26*tau	****** + *******tau	0.04 + 0.27*tau	****** + *******tau	-1	-1	-1.00-	-999	-999	999
6	albcorr_fclimstrong	Aqua	All	983	92	9	0	0.79	0.59	10/ 85/ 03	19/ 63/ 17	44/ 33/ 22	00/ 00/ 00	11/ 83/ 04	0.044	0.03 + 0.28*tau	****** + *******tau	-0.01 + 0.36*tau	****** + *******tau	-1	-1	-1.00-	-999	-999	999
6	albcorr_fclimstrong_nocloud	Aqua	All	905	65	9	0	0.78	0.57	11/ 85/ 02	26/ 60/ 13	33/ 44/ 22	00/ 00/ 00	12/ 83/ 03	0.044	0.04 + 0.27*tau	****** + *******tau	****** + *******tau	****** + *******tau	-1	-1	-1.00-	-999	-999	999
6	corr1_fclimweak	Aqua	All	1591	190	22	7	0.87	0.59	07/ 75/ 16	08/ 42/ 48	18/ 68/ 13	00/ 28/ 71	08/ 71/ 19	0.072	0.03 + 0.24*tau	****** + *******tau	0.06 + 0.25*tau	****** + *******tau	-1	-1	-1.00-	-999	-999	999
6	corr1_fclimweak_nocloud	Aqua	All	1446	135	16	5	0.86	0.62	08/ 76/ 14	13/ 49/ 37	18/ 62/ 18	00/ 20/ 80	09/ 74/ 16	0.063	0.03 + 0.25*tau	****** + *******tau	0.05 + 0.23*tau	****** + *******tau	-1	-1	-1.00-	-999	-999	999
6	corr1_fclimstrong	Aqua	All	989	86	9	0	0.75	0.57	10/ 85/ 03	20/ 62/ 16	44/ 33/ 22	00/ 00/ 00	11/ 83/ 04	0.044	0.02 + 0.32*tau	****** + *******tau	-0.04 + 0.47*tau	****** + *******tau	-1	-1	-1.00-	-999	-999	999
6	corr1_fclimstrong_nocloud	Aqua	All	912	59	8	0	0.75	0.56	11/ 85/ 03	27/ 61/ 11	37/ 37/ 25	00/ 00/ 00	12/ 83/ 03	0.043	0.03 + 0.31*tau	****** + *******tau	****** + *******tau	****** + *******tau	-1	-1	-1.00-	-999	-999	999
6	corr2_fmatchedweak	Aqua	All	1650	167	19	6	0.86	0.57	10/ 76/ 13	12/ 44/ 43	15/ 63/ 21	00/ 33/ 66	10/ 73/ 16	0.068	0.04 + 0.24*tau	****** + *******tau	0.07 + 0.21*tau	****** + *******tau	-1	-1	-1.00-	-999	-999	999
6	corr2_fmatchedweak_nocloud	Aqua	All	1490	120	16	5	0.83	0.6	10/ 77/ 11	17/ 50/ 32	25/ 56/ 18	00/ 20/ 80	11/ 75/ 13	0.06	0.04 + 0.24*tau	****** + *******tau	0.05 + 0.25*tau	****** + *******tau	-1	-1	-1.00-	-999	-999	999
6	corr2_fmatchedstrong	Aqua	All	1082	93	9	2	0.76	0.61	12/ 84/ 02	20/ 63/ 16	33/ 55/ 11	00/ 00/100	13/ 82/ 03	0.046	0.03 + 0.28*tau	****** + *******tau	-0.02 + 0.41*tau	****** + *******tau	-1	-1	-1.00-	-999	-999	999
6	corr2_fmatchedstrong_noclou	Aqua	All	982	64	9	1	0.75	0.68	13/ 84/ 02	31/ 60/ 07	44/ 55/ 00	00/ 00/100	14/ 82/ 02	0.045	0.01 + 0.36*tau	****** + *******tau	****** + *******tau	****** + *******tau	-1	-1	-1.00-	-999	-999	999
7	raw_nobuddy	Terra	All	1086	302	9	0	0.88	0.41	10/ 83/ 05	09/ 70/ 19	22/ 55/ 22	00/ 00/ 00	10/ 80/ 08	0.058	0.01 + 0.23*tau	****** + *******tau	0.00 + 0.30*tau	****** + *******tau	-1	-1	-1.00-	-999	-999	999
7	raw_nosdcheck	Terra	All	1087	297	9	0	0.88	0.43	10/ 84/ 05	09/ 71/ 19	22/ 55/ 22	00/ 00/ 00	10/ 81/ 08	0.057	0.01 + 0.25*tau	****** + *******tau	0.01 + 0.25*tau	****** + *******tau	-1	-1	-1.00-	-999	-999	999
7	raw	Terra	All	1030	282	9	0	0.87	0.45	10/ 86/ 03	10/ 73/ 16	22/ 55/ 22	00/ 00/ 00	10/ 83/ 06	0.052	0.01 + 0.26*tau	****** + *******tau	0.00 + 0.28*tau	****** + *******tau	-1	-1	-1.00-	-999	-999	999
7	raw_fqa	Terra	All	872	211	7	0	0.83	0.57	11/ 87/ 01	12/ 77/ 09	28/ 71/ 00	00/ 00/ 00	11/ 85/ 02	0.047	0.01 + 0.23*tau	****** + *******tau	0.01 + 0.23*tau	****** + *******tau	-1	-1	-1.00-	-999	-999	999
7	raw_fqa_nocloud	Terra	All	856	198	7	0	0.82	0.61	11/ 87/ 01	12/ 79/ 08	28/ 71/ 00	00/ 00/ 00	11/ 85/ 02	0.046	0.01 + 0.23*tau	****** + *******tau	0.02 + 0.20*tau	****** + *******tau	-1	-1	-1.00-	-999	-999	999
7	nocorr_fmatchedweak	Terra	All	873	209	7	0	0.84	0.56	10/ 87/ 01	11/ 77/ 10	28/ 71/ 00	00/ 00/ 00	11/ 85/ 02	0.047	0.01 + 0.24*tau	****** + *******tau	0.02 + 0.21*tau	****** + *******tau	-1	-1	-1.00-	-999	-999	999
7	nocorr_fmatchedweak_nocloud	Terra	All	857	196	7	0	0.83	0.61	11/ 87/ 01	12/ 79/ 08	28/ 71/ 00	00/ 00/ 00	11/ 86/ 02	0.046	0.01 + 0.24*tau	****** + *******tau	0.04 + 0.13*tau	****** + *******tau	-1	-1	-1.00-	-999	-999	999
7	nocorr_fmatchedstrong	Terra	All	530	93	1	0	0.87	0.39	10/ 89/ 00	07/ 79/ 12	100/ 00/ 00	00/ 00/ 00	09/ 87/ 02	0.047	-0.02 + 0.34*tau	****** + *******tau	-0.05 + 0.43*tau	****** + *******tau	-1	-1	-1.00-	-999	-999	999
7	nocorr_fmatchedstrong_noclo	Terra	All	519	80	1	0	0.85	0.45	10/ 88/ 00	07/ 82/ 10	100/ 00/ 00	00/ 00/ 00	10/ 87/ 01	0.045	-0.01 + 0.32*tau	****** + *******tau	****** + *******tau	****** + *******tau	-1	-1	-1.00-	-999	-999	999
7	nocorr_fclimweak	Terra	All	867	204	7	0	0.84	0.58	11/ 87/ 01	12/ 77/ 09	28/ 71/ 00	00/ 00/ 00	11/ 85/ 02	0.047	0.01 + 0.24*tau	****** + *******tau	0.01 + 0.23*tau	****** + *******tau	-1	-1	-1.00-	-999	-999	999
7	nocorr_fclimweak_nocloud	Terra	All	848	190	7	0	0.82	0.61	11/ 87/ 00	13/ 78/ 07	28/ 71/ 00	00/ 00/ 00	12/ 85/ 02	0.047	0.01 + 0.24*tau	****** + *******tau	0.02 + 0.21*tau	****** + *******tau	-1	-1	-1.00-	-999	-999	999
7	nocorr_fclimstrong	Terra	All	423	63	0	0	0.92	0.18	10/ 88/ 00	06/ 84/ 09	00/ 00/ 00	00/ 00/ 00	10/ 87/ 02	0.048	-0.00 + 0.28*tau	****** + *******tau	****** + *******tau	****** + *******tau	-1	-1	-1.00-	-999	-999	999
7	nocorr_fclimstrong_nocloud	Terra	All	414	51	0	0	0.89	0.26	10/ 88/ 00	07/ 88/ 03	00/ 00/ 00	00/ 00/ 00	10/ 88/ 01	0.046	0.01 + 0.25*tau	****** + *******tau	****** + *******tau	****** + *******tau	-1	-1	-1.00-	-999	-999	999
7	albcorr_fmatchedweak	Terra	All	828	253	7	0	0.88	0.61	06/ 90/ 02	09/ 79/ 11	28/ 71/ 00	00/ 00/ 00	07/ 87/ 04	0.046	-0.00 + 0.23*tau	****** + *******tau	0.00 + 0.23*tau	****** + *******tau	-1	-1	-1.00-	-999	-999	999
7	albcorr_fmatchedweak_noclou	Terra	All	817	237	7	0	0.87	0.64	06/ 91/ 02	09/ 81/ 09	28/ 71/ 00	00/ 00/ 00	07/ 88/ 03	0.045	0.00 + 0.22*tau	****** + *******tau	0.03 + 0.14*tau	****** + *******tau	-1	-1	-1.00-	-999	-999	999
7	albcorr_fmatchedstrong	Terra	All	491	134	1	0	0.94	0.44	03/ 93/ 02	04/ 79/ 16	100/ 00/ 00	00/ 00/ 00	04/ 90/ 05	0.043	-0.03 + 0.33*tau	****** + *******tau	-0.06 + 0.43*tau	****** + *******tau	-1	-1	-1.00-	-999	-999	999
7	albcorr_fmatchedstrong_nocl	Terra	All	481	119	1	0	0.92	0.49	03/ 94/ 01	04/ 82/ 13	100/ 00/ 00	00/ 00/ 00	04/ 91/ 04	0.04	-0.02 + 0.30*tau	****** + *******tau	-0.02 + 0.28*tau	****** + *******tau	-1	-1	-1.00-	-999	-999	999
7	albcorr_fclimweak	Terra	All	798	271	9	0	0.92	0.64	04/ 92/ 03	05/ 81/ 13	11/ 88/ 00	00/ 00/ 00	04/ 89/ 05	0.045	-0.00 + 0.22*tau	****** + *******tau	0.00 + 0.21*tau	****** + *******tau	-1	-1	-1.00-	-999	-999	999
7	albcorr_fclimweak_nocloud	Terra	All	783	252	9	0	0.9	0.67	04/ 92/ 02	06/ 83/ 10	11/ 88/ 00	00/ 00/ 00	04/ 90/ 04	0.043	-0.01 + 0.23*tau	****** + *******tau	0.00 + 0.21*tau	****** + *******tau	-1	-1	-1.00-	-999	-999	999
7	albcorr_fclimstrong	Terra	All	377	109	0	0	1.03	0.34	03/ 92/ 03	03/ 80/ 15	00/ 00/ 00	00/ 00/ 00	03/ 89/ 06	0.044	-0.03 + 0.32*tau	****** + *******tau	-0.02 + 0.30*tau	****** + *******tau	-1	-1	-1.00-	-999	-999	999
7	albcorr_fclimstrong_nocloud	Terra	All	369	96	0	0	1	0.41	04/ 93/ 02	03/ 86/ 10	00/ 00/ 00	00/ 00/ 00	03/ 91/ 04	0.041	-0.02 + 0.27*tau	****** + *******tau	0.01 + 0.14*tau	****** + *******tau	-1	-1	-1.00-	-999	-999	999
7	corr1_fclimweak	Terra	All	809	262	7	0	0.88	0.63	04/ 92/ 03	08/ 79/ 12	28/ 71/ 00	00/ 00/ 00	05/ 88/ 05	0.043	-0.02 + 0.27*tau	****** + *******tau	-0.00 + 0.24*tau	****** + *******tau	-1	-1	-1.00-	-999	-999	999
7	corr1_fclimweak_nocloud	Terra	All	796	242	6	0	0.86	0.66	04/ 92/ 02	08/ 82/ 08	33/ 66/ 00	00/ 00/ 00	05/ 90/ 04	0.042	-0.02 + 0.28*tau	****** + *******tau	-0.00 + 0.23*tau	****** + *******tau	-1	-1	-1.00-	-999	-999	999
7	corr1_fclimstrong	Terra	All	382	104	0	0	0.98	0.33	03/ 92/ 03	03/ 84/ 11	00/ 00/ 00	00/ 00/ 00	03/ 90/ 05	0.043	-0.04 + 0.34*tau	****** + *******tau	0.02 + 0.11*tau	****** + *******tau	-1	-1	-1.00-	-999	-999	999
7	corr1_fclimstrong_nocloud	Terra	All	375	91	0	0	0.96	0.4	04/ 93/ 02	03/ 86/ 09	00/ 00/ 00	00/ 00/ 00	03/ 91/ 04	0.04	-0.02 + 0.29*tau	****** + *******tau	0.02 + 0.11*tau	****** + *******tau	-1	-1	-1.00-	-999	-999	999
7	corr2_fmatchedweak	Terra	All	833	250	6	0	0.84	0.61	06/ 90/ 02	10/ 79/ 10	33/ 66/ 00	00/ 00/ 00	07/ 87/ 04	0.045	-0.01 + 0.29*tau	****** + *******tau	-0.00 + 0.27*tau	****** + *******tau	-1	-1	-1.00-	-999	-999	999
7	corr2_fmatchedweak_nocloud	Terra	All	824	231	6	0	0.82	0.63	07/ 90/ 02	11/ 80/ 08	33/ 66/ 00	00/ 00/ 00	08/ 88/ 03	0.044	-0.01 + 0.28*tau	****** + *******tau	-0.01 + 0.28*tau	****** + *******tau	-1	-1	-1.00-	-999	-999	999
7	corr2_fmatchedstrong	Terra	All	499	126	1	0	0.9	0.42	03/ 93/ 02	04/ 82/ 12	100/ 00/ 00	00/ 00/ 00	04/ 91/ 04	0.042	-0.04 + 0.37*tau	****** + *******tau	-0.03 + 0.36*tau	****** + *******tau	-1	-1	-1.00-	-999	-999	999
7	corr2_fmatchedstrong_noclou	Terra	All	491	110	1	0	0.88	0.47	03/ 94/ 01	04/ 83/ 11	100/ 00/ 00	00/ 00/ 00	04/ 92/ 03	0.039	-0.03 + 0.35*tau	****** + *******tau	-0.00 + 0.23*tau	****** + *******tau	-1	-1	-1.00-	-999	-999	999
7	raw_nobuddy	Aqua	All	1011	349	15	0	0.96	0.33	15/ 78/ 06	09/ 58/ 32	00/ 53/ 46	00/ 00/ 00	13/ 73/ 13	0.072	0.02 + 0.24*tau	****** + *******tau	-0.00 + 0.34*tau	****** + *******tau	-1	-1	-1.00-	-999	-999	999
7	raw_nosdcheck	Aqua	All	1009	336	16	0	0.95	0.33	15/ 78/ 05	09/ 58/ 31	00/ 56/ 43	00/ 00/ 00	13/ 73/ 12	0.07	0.03 + 0.24*tau	****** + *******tau	-0.02 + 0.40*tau	****** + *******tau	-1	-1	-1.00-	-999	-999	999
7	raw	Aqua	All	988	312	16	0	0.94	0.32	13/ 80/ 05	10/ 60/ 28	00/ 56/ 43	00/ 00/ 00	13/ 75/ 11	0.067	0.03 + 0.23*tau	****** + *******tau	0.00 + 0.32*tau	****** + *******tau	-1	-1	-1.00-	-999	-999	999
7	raw_fqa	Aqua	All	758	190	9	0	0.88	0.49	16/ 80/ 02	14/ 67/ 17	11/ 66/ 22	00/ 00/ 00	16/ 78/ 05	0.057	0.02 + 0.25*tau	****** + *******tau	0.03 + 0.19*tau	****** + *******tau	-1	-1	-1.00-	-999	-999	999
7	raw_fqa_nocloud	Aqua	All	718	163	6	0	0.86	0.46	17/ 80/ 01	17/ 69/ 13	00/ 83/ 16	00/ 00/ 00	17/ 78/ 03	0.056	0.01 + 0.28*tau	****** + *******tau	0.04 + 0.16*tau	****** + *******tau	-1	-1	-1.00-	-999	-999	999
7	nocorr_fmatchedweak	Aqua	All	758	187	9	0	0.88	0.49	16/ 80/ 02	14/ 67/ 17	11/ 66/ 22	00/ 00/ 00	16/ 77/ 05	0.057	0.01 + 0.25*tau	****** + *******tau	0.03 + 0.19*tau	****** + *******tau	-1	-1	-1.00-	-999	-999	999
7	nocorr_fmatchedweak_nocloud	Aqua	All	718	159	6	0	0.85	0.45	17/ 80/ 01	17/ 68/ 13	00/ 83/ 16	00/ 00/ 00	17/ 78/ 03	0.056	0.01 + 0.27*tau	****** + *******tau	0.04 + 0.15*tau	****** + *******tau	-1	-1	-1.00-	-999	-999	999
7	nocorr_fmatchedstrong	Aqua	All	451	76	1	0	0.93	0.39	13/ 86/ 00	11/ 72/ 15	00/100/ 00	00/ 00/ 00	12/ 84/ 03	0.052	0.01 + 0.26*tau	****** + *******tau	****** + *******tau	****** + *******tau	-1	-1	-1.00-	-999	-999	999
7	nocorr_fmatchedstrong_noclo	Aqua	All	416	60	1	0	0.91	0.34	12/ 86/ 00	11/ 75/ 13	00/100/ 00	00/ 00/ 00	12/ 84/ 02	0.053	-0.01 + 0.35*tau	****** + *******tau	****** + *******tau	****** + *******tau	-1	-1	-1.00-	-999	-999	999
7	nocorr_fclimweak	Aqua	All	749	169	7	0	0.86	0.52	17/ 82/ 00	16/ 73/ 09	14/ 71/ 14	00/ 00/ 00	17/ 80/ 02	0.053	0.01 + 0.27*tau	****** + *******tau	0.02 + 0.20*tau	****** + *******tau	-1	-1	-1.00-	-999	-999	999
7	nocorr_fclimweak_nocloud	Aqua	All	704	147	4	0	0.83	0.5	18/ 80/ 00	19/ 74/ 06	00/100/ 00	00/ 00/ 00	18/ 79/ 01	0.053	0.01 + 0.27*tau	****** + *******tau	0.03 + 0.17*tau	****** + *******tau	-1	-1	-1.00-	-999	-999	999
7	nocorr_fclimstrong	Aqua	All	333	43	1	0	0.89	0.49	13/ 86/ 00	09/ 79/ 11	00/100/ 00	00/ 00/ 00	12/ 85/ 01	0.052	****** + *******tau	****** + *******tau	****** + *******tau	****** + *******tau	-1	-1	-1.00-	-999	-999	999
7	nocorr_fclimstrong_nocloud	Aqua	All	307	29	1	0	0.89	0.58	13/ 86/ 00	06/ 86/ 06	00/100/ 00	00/ 00/ 00	12/ 86/ 00	0.051	****** + *******tau	****** + *******tau	****** + *******tau	****** + *******tau	-1	-1	-1.00-	-999	-999	999
7	albcorr_fmatchedweak	Aqua	All	722	223	9	0	0.92	0.51	15/ 79/ 05	08/ 74/ 17	11/ 66/ 22	00/ 00/ 00	13/ 78/ 08	0.059	0.01 + 0.24*tau	****** + *******tau	-0.00 + 0.28*tau	****** + *******tau	-1	-1	-1.00-	-999	-999	999
7	albcorr_fmatchedweak_noclou	Aqua	All	688	189	6	0	0.9	0.5	16/ 80/ 03	08/ 75/ 15	00/ 83/ 16	00/ 00/ 00	14/ 79/ 06	0.056	0.01 + 0.26*tau	****** + *******tau	0.02 + 0.19*tau	****** + *******tau	-1	-1	-1.00-	-999	-999	999
7	albcorr_fmatchedstrong	Aqua	All	412	114	1	0	0.99	0.44	08/ 87/ 04	04/ 78/ 17	00/100/ 00	00/ 00/ 00	07/ 85/ 07	0.049	-0.01 + 0.29*tau	****** + *******tau	-0.01 + 0.26*tau	****** + *******tau	-1	-1	-1.00-	-999	-999	999
7	albcorr_fmatchedstrong_nocl	Aqua	All	385	91	1	0	0.97	0.4	07/ 88/ 03	04/ 82/ 13	00/100/ 00	00/ 00/ 00	07/ 87/ 05	0.047	-0.05 + 0.44*tau	****** + *******tau	-0.01 + 0.26*tau	****** + *******tau	-1	-1	-1.00-	-999	-999	999
7	albcorr_fclimweak	Aqua	All	681	237	7	0	0.94	0.56	10/ 85/ 03	05/ 79/ 15	00/ 85/ 14	00/ 00/ 00	09/ 84/ 06	0.051	0.01 + 0.23*tau	****** + *******tau	-0.01 + 0.25*tau	****** + *******tau	-1	-1	-1.00-	-999	-999	999
7	albcorr_fclimweak_nocloud	Aqua	All	650	200	5	0	0.91	0.55	11/ 85/ 03	06/ 84/ 09	00/100/ 00	00/ 00/ 00	10/ 85/ 04	0.048	0.01 + 0.24*tau	****** + *******tau	0.02 + 0.15*tau	****** + *******tau	-1	-1	-1.00-	-999	-999	999
7	albcorr_fclimstrong	Aqua	All	290	88	1	0	1	0.53	04/ 90/ 05	01/ 85/ 13	00/100/ 00	00/ 00/ 00	03/ 89/ 07	0.047	****** + *******tau	****** + *******tau	****** + *******tau	****** + *******tau	-1	-1	-1.00-	-999	-999	999
7	albcorr_fclimstrong_nocloud	Aqua	All	272	65	1	0	1	0.6	04/ 91/ 04	00/ 90/ 09	00/100/ 00	00/ 00/ 00	03/ 91/ 05	0.041	****** + *******tau	****** + *******tau	****** + *******tau	****** + *******tau	-1	-1	-1.00-	-999	-999	999
7	corr1_fclimweak	Aqua	All	721	201	4	0	0.85	0.54	11/ 84/ 03	14/ 75/ 10	25/ 50/ 25	00/ 00/ 00	12/ 82/ 05	0.048	-0.02 + 0.32*tau	****** + *******tau	-0.00 + 0.27*tau	****** + *******tau	-1	-1	-1.00-	-999	-999	999
7	corr1_fclimweak_nocloud	Aqua	All	679	174	3	0	0.83	0.52	11/ 85/ 02	17/ 77/ 05	00/100/ 00	00/ 00/ 00	12/ 83/ 03	0.046	-0.02 + 0.32*tau	****** + *******tau	0.01 + 0.21*tau	****** + *******tau	-1	-1	-1.00-	-999	-999	999
7	corr1_fclimstrong	Aqua	All	312	66	1	0	0.91	0.48	04/ 91/ 04	06/ 83/ 10	00/100/ 00	00/ 00/ 00	04/ 89/ 05	0.043	****** + *******tau	****** + *******tau	****** + *******tau	****** + *******tau	-1	-1	-1.00-	-999	-999	999
7	corr1_fclimstrong_nocloud	Aqua	All	287	51	1	0	0.91	0.57	03/ 91/ 04	03/ 92/ 03	100/ 00/ 00	00/ 00/ 00	04/ 91/ 04	0.039	****** + *******tau	****** + *******tau	****** + *******tau	****** + *******tau	-1	-1	-1.00-	-999	-999	999
7	corr2_fmatchedweak	Aqua	All	750	201	3	0	0.84	0.5	15/ 79/ 04	15/ 67/ 16	33/ 66/ 00	00/ 00/ 00	15/ 76/ 07	0.056	-0.02 + 0.34*tau	****** + *******tau	-0.02 + 0.34*tau	****** + *******tau	-1	-1	-1.00-	-999	-999	999
7	corr2_fmatchedweak_nocloud	Aqua	All	715	166	2	0	0.82	0.46	16/ 79/ 04	18/ 69/ 12	50/ 50/ 00	00/ 00/ 00	16/ 77/ 05	0.053	-0.02 + 0.35*tau	****** + *******tau	0.00 + 0.27*tau	****** + *******tau	-1	-1	-1.00-	-999	-999	999
7	corr2_fmatchedstrong	Aqua	All	436	92	0	0	0.91	0.4	07/ 87/ 04	10/ 73/ 15	00/ 00/ 00	00/ 00/ 00	08/ 85/ 06	0.046	-0.03 + 0.37*tau	****** + *******tau	-0.01 + 0.30*tau	****** + *******tau	-1	-1	-1.00-	-999	-999	999
7	corr2_fmatchedstrong_noclou	Aqua	All	403	73	1	0	0.89	0.37	07/ 88/ 03	08/ 82/ 09	100/ 00/ 00	00/ 00/ 00	08/ 87/ 04	0.044	-0.07 + 0.49*tau	****** + *******tau	****** + *******tau	****** + *******tau	-1	-1	-1.00-	-999	-999	999
8	raw_nobuddy	Terra	All	470	206	13	0	1	0.46	29/ 68/ 01	06/ 75/ 18	00/ 30/ 69	00/ 00/ 00	21/ 69/ 08	0.068	0.03 + 0.17*tau	****** + *******tau	-0.00 + 0.26*tau	****** + *******tau	-1	-1	-1.00-	-999	-999	999
8	raw_nosdcheck	Terra	All	473	197	12	0	0.98	0.44	29/ 68/ 01	07/ 76/ 16	00/ 33/ 66	00/ 00/ 00	22/ 70/ 07	0.068	0.02 + 0.21*tau	****** + *******tau	-0.00 + 0.25*tau	****** + *******tau	-1	-1	-1.00-	-999	-999	999
8	raw	Terra	All	463	177	10	0	0.96	0.45	24/ 74/ 01	07/ 76/ 15	00/ 40/ 60	00/ 00/ 00	19/ 74/ 06	0.063	0.02 + 0.19*tau	****** + *******tau	0.00 + 0.24*tau	****** + *******tau	-1	-1	-1.00-	-999	-999	999
8	raw_fqa	Terra	All	339	82	4	0	0.91	0.51	30/ 68/ 00	08/ 84/ 07	00/ 75/ 25	00/ 00/ 00	26/ 71/ 02	0.066	0.05 + 0.10*tau	****** + *******tau	****** + *******tau	****** + *******tau	-1	-1	-1.00-	-999	-999	999
8	raw_fqa_nocloud	Terra	All	330	66	2	0	0.9	0.59	33/ 65/ 00	09/ 90/ 00	00/ 50/ 50	00/ 00/ 00	29/ 69/ 01	0.067	0.03 + 0.18*tau	****** + *******tau	****** + *******tau	****** + *******tau	-1	-1	-1.00-	-999	-999	999
8	nocorr_fmatchedweak	Terra	All	339	82	4	0	0.9	0.52	31/ 67/ 00	08/ 85/ 06	00/ 75/ 25	00/ 00/ 00	26/ 71/ 02	0.066	0.05 + 0.10*tau	****** + *******tau	****** + *******tau	****** + *******tau	-1	-1	-1.00-	-999	-999	999
8	nocorr_fmatchedweak_nocloud	Terra	All	329	67	2	0	0.9	0.59	34/ 64/ 00	08/ 91/ 00	00/ 50/ 50	00/ 00/ 00	29/ 69/ 01	0.067	0.03 + 0.18*tau	****** + *******tau	****** + *******tau	****** + *******tau	-1	-1	-1.00-	-999	-999	999
8	nocorr_fmatchedstrong	Terra	All	294	71	3	0	0.87	0.55	34/ 64/ 00	09/ 81/ 08	00/ 66/ 33	00/ 00/ 00	29/ 68/ 02	0.068	0.05 + 0.12*tau	****** + *******tau	****** + *******tau	****** + *******tau	-1	-1	-1.00-	-999	-999	999
8	nocorr_fmatchedstrong_noclo	Terra	All	281	58	2	0	0.86	0.6	37/ 61/ 00	10/ 87/ 01	00/ 50/ 50	00/ 00/ 00	32/ 66/ 01	0.069	0.08 + 0.03*tau	****** + *******tau	****** + *******tau	****** + *******tau	-1	-1	-1.00-	-999	-999	999
8	nocorr_fclimweak	Terra	All	337	78	4	0	0.89	0.51	34/ 65/ 00	10/ 83/ 06	00/ 75/ 25	00/ 00/ 00	29/ 68/ 01	0.067	0.05 + 0.12*tau	****** + *******tau	****** + *******tau	****** + *******tau	-1	-1	-1.00-	-999	-999	999
8	nocorr_fclimweak_nocloud	Terra	All	327	60	2	0	0.87	0.6	36/ 62/ 00	11/ 88/ 00	00/ 50/ 50	00/ 00/ 00	32/ 66/ 00	0.068	0.07 + 0.08*tau	****** + *******tau	****** + *******tau	****** + *******tau	-1	-1	-1.00-	-999	-999	999
8	nocorr_fclimstrong	Terra	All	273	61	4	0	0.88	0.49	38/ 60/ 00	13/ 81/ 04	00/ 50/ 50	00/ 00/ 00	33/ 64/ 02	0.071	0.05 + 0.17*tau	****** + *******tau	****** + *******tau	****** + *******tau	-1	-1	-1.00-	-999	-999	999
8	nocorr_fclimstrong_nocloud	Terra	All	260	49	2	0	0.85	0.63	41/ 57/ 00	16/ 83/ 00	00/ 50/ 50	00/ 00/ 00	37/ 61/ 00	0.072	0.08 + 0.06*tau	****** + *******tau	****** + *******tau	****** + *******tau	-1	-1	-1.00-	-999	-999	999
8	albcorr_fmatchedweak	Terra	All	333	89	4	0	0.94	0.54	22/ 76/ 00	04/ 86/ 08	00/ 75/ 25	00/ 00/ 00	18/ 78/ 02	0.056	0.04 + 0.10*tau	****** + *******tau	0.05 + 0.05*tau	****** + *******tau	-1	-1	-1.00-	-999	-999	999
8	albcorr_fmatchedweak_noclou	Terra	All	322	77	2	0	0.93	0.59	23/ 75/ 00	05/ 89/ 05	00/ 50/ 50	00/ 00/ 00	20/ 78/ 01	0.056	0.03 + 0.15*tau	****** + *******tau	****** + *******tau	****** + *******tau	-1	-1	-1.00-	-999	-999	999
8	albcorr_fmatchedstrong	Terra	All	281	83	3	0	0.94	0.57	16/ 82/ 01	06/ 84/ 09	00/ 66/ 33	00/ 00/ 00	13/ 82/ 03	0.052	0.03 + 0.13*tau	****** + *******tau	****** + *******tau	****** + *******tau	-1	-1	-1.00-	-999	-999	999
8	albcorr_fmatchedstrong_nocl	Terra	All	267	71	2	0	0.92	0.59	16/ 82/ 01	07/ 85/ 07	00/ 50/ 50	00/ 00/ 00	14/ 82/ 02	0.051	0.05 + 0.07*tau	****** + *******tau	****** + *******tau	****** + *******tau	-1	-1	-1.00-	-999	-999	999
8	albcorr_fclimweak	Terra	All	316	100	4	0	0.96	0.57	13/ 85/ 01	04/ 88/ 08	00/ 50/ 50	00/ 00/ 00	10/ 85/ 03	0.051	0.01 + 0.19*tau	****** + *******tau	0.01 + 0.14*tau	****** + *******tau	-1	-1	-1.00-	-999	-999	999
8	albcorr_fclimweak_nocloud	Terra	All	309	80	2	0	0.94	0.61	15/ 84/ 00	03/ 90/ 06	00/ 50/ 50	00/ 00/ 00	12/ 85/ 02	0.05	0.03 + 0.13*tau	****** + *******tau	****** + *******tau	****** + *******tau	-1	-1	-1.00-	-999	-999	999
8	albcorr_fclimstrong	Terra	All	254	79	4	0	0.96	0.52	16/ 82/ 01	06/ 87/ 06	00/ 50/ 50	00/ 00/ 00	13/ 83/ 02	0.05	0.00 + 0.23*tau	****** + *******tau	****** + *******tau	****** + *******tau	-1	-1	-1.00-	-999	-999	999
8	albcorr_fclimstrong_nocloud	Terra	All	241	68	2	0	0.92	0.6	16/ 82/ 00	07/ 89/ 02	00/ 50/ 50	00/ 00/ 00	14/ 84/ 01	0.049	0.03 + 0.14*tau	****** + *******tau	****** + *******tau	****** + *******tau	-1	-1	-1.00-	-999	-999	999
8	corr1_fclimweak	Terra	All	309	107	4	0	1.06	0.59	13/ 85/ 01	01/ 85/ 12	00/ 50/ 50	00/ 00/ 00	10/ 85/ 04	0.053	0.01 + 0.20*tau	****** + *******tau	-0.00 + 0.18*tau	****** + *******tau	-1	-1	-1.00-	-999	-999	999
8	corr1_fclimweak_nocloud	Terra	All	303	85	2	0	1.03	0.62	15/ 83/ 00	01/ 90/ 08	00/ 50/ 50	00/ 00/ 00	12/ 84/ 02	0.052	0.02 + 0.17*tau	****** + *******tau	****** + *******tau	****** + *******tau	-1	-1	-1.00-	-999	-999	999
8	corr1_fclimstrong	Terra	All	246	87	4	0	1.06	0.56	15/ 83/ 01	03/ 88/ 08	00/ 50/ 50	00/ 00/ 00	12/ 84/ 03	0.053	-0.01 + 0.26*tau	****** + *******tau	-0.00 + 0.18*tau	****** + *******tau	-1	-1	-1.00-	-999	-999	999
8	corr1_fclimstrong_nocloud	Terra	All	236	73	2	0	1.01	0.62	16/ 82/ 01	02/ 90/ 06	00/ 50/ 50	00/ 00/ 00	12/ 84/ 02	0.05	0.02 + 0.18*tau	****** + *******tau	****** + *******tau	****** + *******tau	-1	-1	-1.00-	-999	-999	999
8	corr2_fmatchedweak	Terra	All	324	98	4	0	1.04	0.58	22/ 76/ 00	01/ 89/ 09	00/ 50/ 50	00/ 00/ 00	17/ 79/ 03	0.058	0.03 + 0.15*tau	****** + *******tau	-0.00 + 0.20*tau	****** + *******tau	-1	-1	-1.00-	-999	-999	999
8	corr2_fmatchedweak_nocloud	Terra	All	317	80	3	0	1.02	0.61	23/ 76/ 00	01/ 92/ 06	00/ 66/ 33	00/ 00/ 00	18/ 79/ 02	0.057	0.05 + 0.08*tau	****** + *******tau	****** + *******tau	****** + *******tau	-1	-1	-1.00-	-999	-999	999
8	corr2_fmatchedstrong	Terra	All	270	93	4	0	1.03	0.61	15/ 82/ 01	02/ 88/ 09	00/ 50/ 50	00/ 00/ 00	12/ 83/ 04	0.054	0.02 + 0.16*tau	****** + *******tau	0.00 + 0.17*tau	****** + *******tau	-1	-1	-1.00-	-999	-999	999
8	corr2_fmatchedstrong_noclou	Terra	All	261	77	2	0	1.01	0.61	16/ 81/ 01	02/ 88/ 09	00/ 50/ 50	00/ 00/ 00	13/ 83/ 03	0.053	0.04 + 0.11*tau	****** + *******tau	****** + *******tau	****** + *******tau	-1	-1	-1.00-	-999	-999	999
8	raw_nobuddy	Aqua	All	584	301	14	0	1.1	0.44	12/ 83/ 04	01/ 75/ 22	00/ 50/ 50	00/ 00/ 00	08/ 80/ 11	0.062	0.03 + 0.14*tau	****** + *******tau	-0.02 + 0.29*tau	****** + *******tau	-1	-1	-1.00-	-999	-999	999
8	raw_nosdcheck	Aqua	All	583	296	15	0	1.1	0.45	12/ 83/ 03	01/ 76/ 21	00/ 53/ 46	00/ 00/ 00	08/ 80/ 10	0.061	0.04 + 0.12*tau	****** + *******tau	-0.03 + 0.31*tau	****** + *******tau	-1	-1	-1.00-	-999	-999	999
8	raw	Aqua	All	573	286	12	0	1.1	0.42	09/ 86/ 03	02/ 76/ 21	00/ 50/ 50	00/ 00/ 00	07/ 82/ 10	0.059	0.01 + 0.23*tau	****** + *******tau	-0.02 + 0.31*tau	****** + *******tau	-1	-1	-1.00-	-999	-999	999
8	raw_fqa	Aqua	All	408	127	5	0	1.05	0.43	16/ 81/ 01	00/ 84/ 14	00/ 40/ 60	00/ 00/ 00	12/ 81/ 05	0.059	0.01 + 0.22*tau	****** + *******tau	-0.04 + 0.31*tau	****** + *******tau	-1	-1	-1.00-	-999	-999	999
8	raw_fqa_nocloud	Aqua	All	377	100	3	0	1.02	0.58	20/ 77/ 01	03/ 90/ 07	00/ 33/ 66	00/ 00/ 00	16/ 80/ 03	0.054	-0.00 + 0.30*tau	****** + *******tau	-0.03 + 0.27*tau	****** + *******tau	-1	-1	-1.00-	-999	-999	999
8	nocorr_fmatchedweak	Aqua	All	410	125	5	0	1.05	0.43	16/ 81/ 01	00/ 84/ 15	00/ 40/ 60	00/ 00/ 00	12/ 81/ 05	0.06	0.02 + 0.22*tau	****** + *******tau	-0.02 + 0.28*tau	****** + *******tau	-1	-1	-1.00-	-999	-999	999
8	nocorr_fmatchedweak_nocloud	Aqua	All	380	97	3	0	1.03	0.58	20/ 77/ 01	03/ 89/ 07	00/ 33/ 66	00/ 00/ 00	17/ 79/ 03	0.054	-0.00 + 0.30*tau	****** + *******tau	-0.00 + 0.19*tau	****** + *******tau	-1	-1	-1.00-	-999	-999	999
8	nocorr_fmatchedstrong	Aqua	All	348	99	4	0	1	0.38	21/ 77/ 01	02/ 82/ 15	00/ 75/ 25	00/ 00/ 00	17/ 78/ 04	0.06	0.02 + 0.22*tau	****** + *******tau	-0.01 + 0.25*tau	****** + *******tau	-1	-1	-1.00-	-999	-999	999
8	nocorr_fmatchedstrong_noclo	Aqua	All	306	79	1	0	0.97	0.54	26/ 71/ 01	01/ 91/ 07	00/100/ 00	00/ 00/ 00	21/ 75/ 02	0.059	0.01 + 0.26*tau	****** + *******tau	****** + *******tau	****** + *******tau	-1	-1	-1.00-	-999	-999	999
8	nocorr_fclimweak	Aqua	All	404	112	6	0	1.04	0.43	20/ 78/ 01	00/ 85/ 13	00/ 33/ 66	00/ 00/ 00	16/ 79/ 04	0.061	0.01 + 0.25*tau	****** + *******tau	-0.04 + 0.33*tau	****** + *******tau	-1	-1	-1.00-	-999	-999	999
8	nocorr_fclimweak_nocloud	Aqua	All	369	86	3	0	1.02	0.63	24/ 74/ 01	00/ 94/ 05	00/ 33/ 66	00/ 00/ 00	19/ 77/ 02	0.057	0.00 + 0.29*tau	****** + *******tau	****** + *******tau	****** + *******tau	-1	-1	-1.00-	-999	-999	999
8	nocorr_fclimstrong	Aqua	All	278	79	3	0	1	0.45	23/ 75/ 01	01/ 91/ 07	00/ 33/ 66	00/ 00/ 00	18/ 78/ 03	0.063	0.03 + 0.16*tau	****** + *******tau	****** + *******tau	****** + *******tau	-1	-1	-1.00-	-999	-999	999
8	nocorr_fclimstrong_nocloud	Aqua	All	234	58	1	0	0.98	0.65	28/ 70/ 01	00/ 96/ 03	00/ 00/100	00/ 00/ 00	22/ 75/ 02	0.062	0.02 + 0.19*tau	****** + *******tau	****** + *******tau	****** + *******tau	-1	-1	-1.00-	-999	-999	999
8	albcorr_fmatchedweak	Aqua	All	391	146	5	0	1.07	0.46	14/ 80/ 05	01/ 80/ 18	00/ 40/ 60	00/ 00/ 00	11/ 79/ 09	0.062	0.01 + 0.22*tau	****** + *******tau	-0.03 + 0.32*tau	****** + *******tau	-1	-1	-1.00-	-999	-999	999
8	albcorr_fmatchedweak_noclou	Aqua	All	365	113	3	0	1.05	0.59	17/ 80/ 02	02/ 85/ 11	00/ 33/ 66	00/ 00/ 00	13/ 81/ 04	0.053	-0.01 + 0.29*tau	****** + *******tau	-0.01 + 0.22*tau	****** + *******tau	-1	-1	-1.00-	-999	-999	999
8	albcorr_fmatchedstrong	Aqua	All	320	128	4	0	1.06	0.43	09/ 83/ 06	01/ 77/ 21	00/ 75/ 25	00/ 00/ 00	07/ 81/ 10	0.057	0.01 + 0.21*tau	****** + *******tau	-0.00 + 0.21*tau	****** + *******tau	-1	-1	-1.00-	-999	-999	999
8	albcorr_fmatchedstrong_nocl	Aqua	All	286	99	1	0	1.02	0.51	12/ 84/ 03	01/ 84/ 14	00/100/ 00	00/ 00/ 00	09/ 84/ 06	0.049	-0.00 + 0.27*tau	****** + *******tau	0.01 + 0.16*tau	****** + *******tau	-1	-1	-1.00-	-999	-999	999
8	albcorr_fclimweak	Aqua	All	375	142	6	0	1.1	0.44	12/ 81/ 05	01/ 77/ 21	00/ 33/ 66	00/ 00/ 00	09/ 80/ 10	0.061	0.00 + 0.27*tau	****** + *******tau	-0.05 + 0.37*tau	****** + *******tau	-1	-1	-1.00-	-999	-999	999
8	albcorr_fclimweak_nocloud	Aqua	All	343	113	3	0	1.07	0.57	12/ 84/ 02	01/ 84/ 14	00/ 33/ 66	00/ 00/ 00	09/ 84/ 05	0.05	-0.03 + 0.38*tau	****** + *******tau	-0.03 + 0.28*tau	****** + *******tau	-1	-1	-1.00-	-999	-999	999
8	albcorr_fclimstrong	Aqua	All	256	103	3	0	1.09	0.48	08/ 85/ 06	00/ 80/ 18	00/ 33/ 66	00/ 00/ 00	06/ 83/ 10	0.059	0.00 + 0.22*tau	****** + *******tau	-0.06 + 0.41*tau	****** + *******tau	-1	-1	-1.00-	-999	-999	999
8	albcorr_fclimstrong_nocloud	Aqua	All	218	75	1	0	1.06	0.64	10/ 85/ 03	00/ 89/ 10	00/ 00/100	00/ 00/ 00	07/ 86/ 05	0.049	0.01 + 0.20*tau	****** + *******tau	****** + *******tau	****** + *******tau	-1	-1	-1.00-	-999	-999	999
8	corr1_fclimweak	Aqua	All	364	151	7	0	1.15	0.45	12/ 81/ 05	01/ 76/ 21	00/ 28/ 71	00/ 00/ 00	09/ 79/ 11	0.064	0.00 + 0.28*tau	****** + *******tau	-0.06 + 0.40*tau	****** + *******tau	-1	-1	-1.00-	-999	-999	999
8	corr1_fclimweak_nocloud	Aqua	All	337	117	4	0	1.12	0.58	12/ 84/ 02	00/ 82/ 17	00/ 25/ 75	00/ 00/ 00	09/ 83/ 06	0.052	-0.03 + 0.40*tau	****** + *******tau	-0.01 + 0.23*tau	****** + *******tau	-1	-1	-1.00-	-999	-999	999
8	corr1_fclimstrong	Aqua	All	249	108	3	0	1.13	0.48	08/ 85/ 06	01/ 76/ 21	00/ 33/ 66	00/ 00/ 00	06/ 82/ 11	0.062	0.02 + 0.17*tau	****** + *******tau	-0.04 + 0.34*tau	****** + *******tau	-1	-1	-1.00-	-999	-999	999
8	corr1_fclimstrong_nocloud	Aqua	All	211	82	1	0	1.09	0.59	09/ 86/ 03	02/ 82/ 14	00/ 00/100	00/ 00/ 00	07/ 85/ 06	0.051	0.01 + 0.22*tau	****** + *******tau	****** + *******tau	****** + *******tau	-1	-1	-1.00-	-999	-999	999
8	corr2_fmatchedweak	Aqua	All	381	151	7	0	1.12	0.45	14/ 79/ 05	01/ 77/ 21	00/ 28/ 71	00/ 00/ 00	10/ 78/ 10	0.064	0.02 + 0.20*tau	****** + *******tau	-0.03 + 0.33*tau	****** + *******tau	-1	-1	-1.00-	-999	-999	999
8	corr2_fmatchedweak_nocloud	Aqua	All	358	117	4	0	1.09	0.56	17/ 80/ 02	02/ 82/ 14	00/ 25/ 75	00/ 00/ 00	13/ 80/ 06	0.054	-0.02 + 0.34*tau	****** + *******tau	0.01 + 0.17*tau	****** + *******tau	-1	-1	-1.00-	-999	-999	999
8	corr2_fmatchedstrong	Aqua	All	314	133	5	0	1.11	0.46	09/ 83/ 06	01/ 76/ 21	00/ 40/ 60	00/ 00/ 00	07/ 81/ 11	0.06	0.02 + 0.20*tau	****** + *******tau	-0.04 + 0.35*tau	****** + *******tau	-1	-1	-1.00-	-999	-999	999
8	corr2_fmatchedstrong_noclou	Aqua	All	281	104	1	0	1.07	0.53	12/ 84/ 03	00/ 81/ 17	00/100/ 00	00/ 00/ 00	09/ 83/ 06	0.051	0.01 + 0.23*tau	****** + *******tau	0.00 + 0.19*tau	****** + *******tau	-1	-1	-1.00-	-999	-999	999
9	raw_nobuddy	Terra	All	2695	3255	777	89	0.77	0.52	36/ 51/ 11	27/ 56/ 16	23/ 57/ 18	04/ 53/ 41	30/ 54/ 14	0.118	0.03 + 0.25*tau	-0.28 + 0.49*tau	0.08 + 0.19*tau	****** + *******tau	-1	-1	-1	0.638	0.44	0.44
9	raw_nosdcheck	Terra	All	2685	3169	746	86	0.77	0.52	36/ 51/ 11	27/ 56/ 15	23/ 58/ 17	04/ 53/ 41	30/ 54/ 14	0.118	0.03 + 0.25*tau	-0.17 + 0.43*tau	0.08 + 0.19*tau	****** + *******tau	-1	-1	-1	0.634	0.438	0.438
9	raw	Terra	All	2512	2971	674	75	0.77	0.54	36/ 52/ 10	28/ 57/ 13	25/ 60/ 14	04/ 54/ 41	31/ 55/ 13	0.105	0.03 + 0.26*tau	-0.00 + 0.33*tau	0.08 + 0.17*tau	****** + *******tau	-1	-1	-1	0.62	0.423	0.423
9	raw_fqa	Terra	All	1271	1159	277	35	0.74	0.63	36/ 54/ 09	39/ 53/ 06	32/ 59/ 07	11/ 68/ 20	36/ 54/ 08	0.08	0.03 + 0.27*tau	****** + *******tau	0.11 + 0.14*tau	****** + *******tau	-1	-1	-1	0.418	0.366	0.366
9	raw_fqa_nocloud	Terra	All	1197	1013	222	30	0.72	0.64	39/ 52/ 07	42/ 51/ 06	36/ 57/ 06	10/ 73/ 16	40/ 52/ 07	0.077	0.03 + 0.28*tau	****** + *******tau	0.11 + 0.14*tau	****** + *******tau	-1	-1	-1	0.408	0.388	0.388
9	nocorr_fmatchedweak	Terra	All	1185	1060	256	34	0.74	0.65	36/ 53/ 09	41/ 50/ 07	31/ 62/ 06	05/ 73/ 20	37/ 53/ 08	0.079	0.03 + 0.26*tau	****** + *******tau	0.11 + 0.13*tau	****** + *******tau	-1	-1	-1	0.421	0.365	0.365
9	nocorr_fmatchedweak_nocloud	Terra	All	1123	926	204	29	0.72	0.66	39/ 52/ 08	44/ 49/ 06	37/ 57/ 04	06/ 75/ 17	41/ 51/ 07	0.077	0.03 + 0.27*tau	****** + *******tau	0.11 + 0.16*tau	****** + *******tau	-1	-1	-1	0.412	0.415	0.415
9	nocorr_fmatchedstrong	Terra	All	523	482	141	16	0.72	0.65	40/ 53/ 06	50/ 45/ 04	36/ 59/ 04	12/ 68/ 18	43/ 51/ 05	0.076	0.03 + 0.28*tau	****** + *******tau	0.15 + 0.11*tau	****** + *******tau	-1	-1	-1	0.361	0.342	0.342
9	nocorr_fmatchedstrong_noclo	Terra	All	476	409	112	13	0.7	0.67	44/ 51/ 03	55/ 41/ 02	36/ 60/ 02	15/ 69/ 15	47/ 48/ 03	0.071	0.03 + 0.29*tau	****** + *******tau	0.15 + 0.13*tau	****** + *******tau	-1	-1	-1	0.383	0.383	0.383
9	nocorr_fclimweak	Terra	All	1103	998	251	33	0.73	0.66	35/ 56/ 08	42/ 50/ 07	33/ 61/ 05	12/ 66/ 21	37/ 54/ 07	0.078	0.03 + 0.27*tau	****** + *******tau	0.12 + 0.12*tau	****** + *******tau	-1	-1	-1	0.429	0.346	0.346
9	nocorr_fclimweak_nocloud	Terra	All	1045	854	198	28	0.71	0.67	38/ 53/ 07	45/ 48/ 06	38/ 56/ 05	07/ 75/ 17	41/ 51/ 06	0.077	0.04 + 0.27*tau	****** + *******tau	0.13 + 0.11*tau	****** + *******tau	-1	-1	-1	0.419	0.342	0.342
9	nocorr_fclimstrong	Terra	All	299	318	93	17	0.72	0.67	48/ 47/ 04	49/ 48/ 01	34/ 62/ 03	17/ 64/ 17	46/ 50/ 03	0.078	0.02 + 0.28*tau	****** + *******tau	0.12 + 0.14*tau	****** + *******tau	-1	-1	-1	0.339	0.353	0.353
9	nocorr_fclimstrong_nocloud	Terra	All	278	279	76	12	0.71	0.68	52/ 44/ 03	53/ 45/ 01	35/ 60/ 03	16/ 66/ 16	50/ 47/ 02	0.076	0.03 + 0.27*tau	****** + *******tau	0.15 + 0.09*tau	****** + *******tau	-1	-1	-1	0.349	0.302	0.302
9	albcorr_fmatchedweak	Terra	All	1262	987	252	34	0.73	0.65	47/ 44/ 08	45/ 47/ 06	32/ 61/ 05	05/ 73/ 20	44/ 47/ 07	0.081	0.05 + 0.25*tau	****** + *******tau	0.13 + 0.12*tau	****** + *******tau	-1	-1	-1	0.421	0.355	0.355
9	albcorr_fmatchedweak_noclou	Terra	All	1196	851	204	29	0.71	0.67	50/ 43/ 06	47/ 45/ 06	38/ 57/ 04	06/ 75/ 17	48/ 45/ 06	0.081	0.05 + 0.26*tau	****** + *******tau	0.13 + 0.12*tau	****** + *******tau	-1	-1	-1	0.412	0.368	0.368
9	albcorr_fmatchedstrong	Terra	All	497	510	141	16	0.73	0.66	29/ 61/ 08	44/ 50/ 05	36/ 59/ 04	12/ 68/ 18	36/ 56/ 07	0.075	0.01 + 0.29*tau	****** + *******tau	0.12 + 0.14*tau	****** + *******tau	-1	-1	-1	0.361	0.382	0.382
9	albcorr_fmatchedstrong_nocl	Terra	All	452	434	112	13	0.71	0.68	32/ 61/ 06	48/ 47/ 03	36/ 60/ 02	15/ 69/ 15	39/ 55/ 04	0.067	0.02 + 0.30*tau	****** + *******tau	0.13 + 0.13*tau	****** + *******tau	-1	-1	-1	0.383	0.374	0.374
9	albcorr_fclimweak	Terra	All	1115	975	259	33	0.74	0.66	39/ 51/ 08	42/ 49/ 07	31/ 63/ 05	06/ 69/ 24	39/ 52/ 08	0.08	0.04 + 0.25*tau	****** + *******tau	0.13 + 0.10*tau	****** + *******tau	-1	-1	-1	0.422	0.319	0.319
9	albcorr_fclimweak_nocloud	Terra	All	1058	834	201	28	0.72	0.68	43/ 49/ 07	46/ 47/ 06	36/ 58/ 04	07/ 71/ 21	43/ 49/ 06	0.078	0.04 + 0.28*tau	****** + *******tau	0.13 + 0.11*tau	****** + *******tau	-1	-1	-1	0.414	0.341	0.341
9	albcorr_fclimstrong	Terra	All	263	349	100	17	0.74	0.69	31/ 63/ 04	39/ 57/ 02	33/ 64/ 03	11/ 70/ 17	35/ 60/ 03	0.071	-0.00 + 0.30*tau	****** + *******tau	0.10 + 0.14*tau	****** + *******tau	-1	-1	-1	0.333	0.34	0.34
9	albcorr_fclimstrong_nocloud	Terra	All	246	305	82	13	0.73	0.69	34/ 60/ 04	43/ 54/ 01	34/ 62/ 03	15/ 69/ 15	38/ 57/ 03	0.066	0.01 + 0.28*tau	****** + *******tau	0.12 + 0.13*tau	****** + *******tau	-1	-1	-1	0.331	0.325	0.325
9	corr1_fclimweak	Terra	All	1115	975	259	33	0.74	0.66	39/ 51/ 08	42/ 49/ 07	31/ 63/ 05	06/ 69/ 24	39/ 52/ 08	0.08	0.04 + 0.25*tau	****** + *******tau	0.13 + 0.10*tau	****** + *******tau	-1	-1	-1	0.422	0.319	0.319
9	corr1_fclimweak_nocloud	Terra	All	1058	834	201	28	0.72	0.68	43/ 49/ 07	46/ 47/ 06	36/ 58/ 04	07/ 71/ 21	43/ 49/ 06	0.078	0.04 + 0.28*tau	****** + *******tau	0.13 + 0.11*tau	****** + *******tau	-1	-1	-1	0.414	0.341	0.341
9	corr1_fclimstrong	Terra	All	263	349	100	17	0.74	0.69	31/ 63/ 04	39/ 57/ 02	33/ 64/ 03	11/ 70/ 17	35/ 60/ 03	0.071	-0.00 + 0.30*tau	****** + *******tau	0.10 + 0.14*tau	****** + *******tau	-1	-1	-1	0.333	0.34	0.34
9	corr1_fclimstrong_nocloud	Terra	All	246	305	82	13	0.73	0.69	34/ 60/ 04	43/ 54/ 01	34/ 62/ 03	15/ 69/ 15	38/ 57/ 03	0.066	0.01 + 0.28*tau	****** + *******tau	0.12 + 0.13*tau	****** + *******tau	-1	-1	-1	0.331	0.325	0.325
9	corr2_fmatchedweak	Terra	All	1262	987	252	34	0.73	0.65	47/ 44/ 08	45/ 47/ 06	32/ 61/ 05	05/ 73/ 20	44/ 47/ 07	0.081	0.05 + 0.25*tau	****** + *******tau	0.13 + 0.12*tau	****** + *******tau	-1	-1	-1	0.421	0.355	0.355
9	corr2_fmatchedweak_nocloud	Terra	All	1196	851	204	29	0.71	0.67	50/ 43/ 06	47/ 45/ 06	38/ 57/ 04	06/ 75/ 17	48/ 45/ 06	0.081	0.05 + 0.26*tau	****** + *******tau	0.13 + 0.12*tau	****** + *******tau	-1	-1	-1	0.412	0.368	0.368
9	corr2_fmatchedstrong	Terra	All	497	510	141	16	0.73	0.66	29/ 61/ 08	44/ 50/ 05	36/ 59/ 04	12/ 68/ 18	36/ 56/ 07	0.075	0.01 + 0.29*tau	****** + *******tau	0.12 + 0.14*tau	****** + *******tau	-1	-1	-1	0.361	0.382	0.382
9	corr2_fmatchedstrong_noclou	Terra	All	452	434	112	13	0.71	0.68	32/ 61/ 06	48/ 47/ 03	36/ 60/ 02	15/ 69/ 15	39/ 55/ 04	0.067	0.02 + 0.30*tau	****** + *******tau	0.13 + 0.13*tau	****** + *******tau	-1	-1	-1	0.383	0.374	0.374
9	raw_nobuddy	Aqua	All	2354	3235	675	64	0.77	0.51	33/ 54/ 11	25/ 57/ 17	24/ 58/ 17	03/ 71/ 25	28/ 56/ 15	0.128	0.02 + 0.28*tau	0.19 + 0.18*tau	0.08 + 0.20*tau	****** + *******tau	-1	-1	-1	0.539	0.487	0.487
9	raw_nosdcheck	Aqua	All	2309	3152	641	62	0.76	0.52	33/ 54/ 11	25/ 57/ 16	24/ 59/ 15	03/ 72/ 24	28/ 56/ 14	0.128	0.02 + 0.28*tau	0.20 + 0.17*tau	0.08 + 0.20*tau	****** + *******tau	-1	-1	-1	0.529	0.475	0.475
9	raw	Aqua	All	2151	2934	581	55	0.76	0.54	31/ 56/ 11	26/ 58/ 15	25/ 60/ 13	00/ 76/ 23	28/ 58/ 13	0.115	0.01 + 0.29*tau	0.25 + 0.14*tau	0.08 + 0.19*tau	****** + *******tau	-1	-1	-1	0.506	0.467	0.467
9	raw_fqa	Aqua	All	1020	1095	242	34	0.72	0.63	30/ 61/ 08	33/ 57/ 09	33/ 61/ 04	00/ 73/ 26	31/ 59/ 08	0.078	-0.00 + 0.33*tau	****** + *******tau	0.08 + 0.19*tau	****** + *******tau	-1	-1	-1	0.463	0.459	0.459
9	raw_fqa_nocloud	Aqua	All	968	962	199	25	0.72	0.65	32/ 61/ 06	36/ 55/ 07	35/ 58/ 06	00/ 92/ 08	34/ 58/ 06	0.072	-0.01 + 0.35*tau	****** + *******tau	0.08 + 0.21*tau	****** + *******tau	-1	-1	-1	0.306	0.471	0.471
9	nocorr_fmatchedweak	Aqua	All	958	1026	240	32	0.72	0.63	30/ 60/ 08	34/ 56/ 08	34/ 60/ 05	00/ 78/ 21	32/ 58/ 08	0.079	-0.00 + 0.32*tau	****** + *******tau	0.09 + 0.20*tau	****** + *******tau	-1	-1	-1	0.354	0.454	0.454
9	nocorr_fmatchedweak_nocloud	Aqua	All	904	899	195	24	0.72	0.66	33/ 60/ 06	38/ 54/ 07	35/ 57/ 06	00/ 91/ 08	35/ 57/ 06	0.073	0.00 + 0.33*tau	****** + *******tau	0.09 + 0.20*tau	****** + *******tau	-1	-1	-1	0.297	0.465	0.465
9	nocorr_fmatchedstrong	Aqua	All	465	404	129	14	0.69	0.59	35/ 57/ 06	51/ 44/ 04	35/ 58/ 05	07/ 78/ 14	41/ 52/ 05	0.067	0.02 + 0.31*tau	****** + *******tau	0.15 + 0.13*tau	****** + *******tau	-1	-1	-1	0.546	0.407	0.407
9	nocorr_fmatchedstrong_noclo	Aqua	All	405	357	94	11	0.69	0.65	40/ 55/ 04	52/ 42/ 04	40/ 54/ 05	09/ 90/ 00	44/ 50/ 04	0.067	0.02 + 0.32*tau	****** + *******tau	0.15 + 0.15*tau	****** + *******tau	-1	-1	-1	0.293	0.419	0.419
9	nocorr_fclimweak	Aqua	All	905	962	225	30	0.72	0.63	29/ 62/ 08	36/ 55/ 07	34/ 60/ 05	00/ 80/ 20	32/ 59/ 07	0.074	-0.00 + 0.33*tau	****** + *******tau	0.09 + 0.19*tau	****** + *******tau	-1	-1	-1	0.44	0.447	0.447
9	nocorr_fclimweak_nocloud	Aqua	All	835	841	187	24	0.71	0.66	31/ 61/ 06	39/ 53/ 06	37/ 56/ 05	00/ 95/ 04	35/ 58/ 06	0.07	-0.01 + 0.34*tau	****** + *******tau	0.09 + 0.20*tau	****** + *******tau	-1	-1	-1	0.253	0.437	0.437
9	nocorr_fclimstrong	Aqua	All	288	261	94	9	0.7	0.62	42/ 52/ 05	44/ 51/ 03	35/ 62/ 02	11/ 55/ 33	41/ 53/ 04	0.073	0.03 + 0.28*tau	****** + *******tau	0.13 + 0.13*tau	****** + *******tau	-1	-1	-1.00-	-999	-999	999
9	nocorr_fclimstrong_nocloud	Aqua	All	254	231	66	5	0.71	0.72	46/ 50/ 02	48/ 48/ 03	40/ 57/ 01	20/ 60/ 20	46/ 50/ 03	0.068	0.03 + 0.29*tau	****** + *******tau	0.13 + 0.14*tau	****** + *******tau	-1	-1	-1.00-	-999	-999	999
9	albcorr_fmatchedweak	Aqua	All	1056	924	240	32	0.71	0.62	38/ 53/ 07	40/ 51/ 08	34/ 60/ 05	00/ 78/ 21	38/ 53/ 07	0.08	0.02 + 0.30*tau	****** + *******tau	0.11 + 0.17*tau	****** + *******tau	-1	-1	-1	0.354	0.431	0.431
9	albcorr_fmatchedweak_noclou	Aqua	All	1002	800	194	24	0.71	0.65	42/ 51/ 05	43/ 49/ 06	36/ 57/ 06	00/ 91/ 08	41/ 51/ 06	0.077	0.02 + 0.32*tau	****** + *******tau	0.11 + 0.18*tau	****** + *******tau	-1	-1	-1	0.297	0.445	0.445
9	albcorr_fmatchedstrong	Aqua	All	437	432	129	14	0.7	0.61	24/ 65/ 09	46/ 47/ 05	35/ 58/ 05	07/ 78/ 14	35/ 57/ 07	0.067	0.00 + 0.32*tau	****** + *******tau	0.12 + 0.17*tau	****** + *******tau	-1	-1	-1	0.546	0.457	0.457
9	albcorr_fmatchedstrong_nocl	Aqua	All	378	385	94	11	0.7	0.66	29/ 63/ 07	48/ 47/ 04	40/ 54/ 05	09/ 90/ 00	38/ 55/ 05	0.064	0.01 + 0.33*tau	****** + *******tau	0.12 + 0.18*tau	****** + *******tau	-1	-1	-1	0.293	0.443	0.443
9	albcorr_fclimweak	Aqua	All	928	932	232	30	0.72	0.63	30/ 61/ 07	37/ 55/ 07	37/ 56/ 05	00/ 80/ 20	33/ 58/ 07	0.076	0.00 + 0.31*tau	****** + *******tau	0.10 + 0.18*tau	****** + *******tau	-1	-1	-1	0.441	0.429	0.429
9	albcorr_fclimweak_nocloud	Aqua	All	863	807	190	24	0.72	0.66	35/ 58/ 05	40/ 53/ 06	40/ 54/ 05	00/ 95/ 04	37/ 56/ 05	0.072	0.01 + 0.32*tau	****** + *******tau	0.10 + 0.18*tau	****** + *******tau	-1	-1	-1	0.25	0.417	0.417
9	albcorr_fclimstrong	Aqua	All	258	281	101	10	0.72	0.64	28/ 63/ 07	39/ 54/ 05	31/ 63/ 04	10/ 60/ 30	33/ 59/ 06	0.069	0.01 + 0.28*tau	****** + *******tau	0.09 + 0.18*tau	****** + *******tau	-1	-1	-1.00-	-999	-999	999
9	albcorr_fclimstrong_nocloud	Aqua	All	229	245	75	7	0.73	0.73	30/ 64/ 05	41/ 54/ 04	37/ 58/ 04	14/ 71/ 14	35/ 59/ 04	0.061	0.01 + 0.29*tau	****** + *******tau	0.08 + 0.21*tau	****** + *******tau	-1	-1	-1.00-	-999	-999	999
9	corr1_fclimweak	Aqua	All	982	934	187	22	0.67	0.64	31/ 60/ 07	48/ 46/ 05	48/ 47/ 04	09/ 77/ 13	40/ 53/ 06	0.072	-0.02 + 0.39*tau	****** + *******tau	0.11 + 0.22*tau	****** + *******tau	-1	-1	-1	0.432	0.523	0.523
9	corr1_fclimweak_nocloud	Aqua	All	907	814	153	16	0.66	0.67	36/ 58/ 05	51/ 44/ 04	52/ 44/ 03	25/ 75/ 00	43/ 51/ 04	0.07	-0.01 + 0.39*tau	****** + *******tau	0.12 + 0.22*tau	****** + *******tau	-1	-1	-1	0.32	0.493	0.493
9	corr1_fclimstrong	Aqua	All	276	292	79	5	0.67	0.61	28/ 63/ 07	51/ 45/ 03	37/ 59/ 02	40/ 60/ 00	39/ 55/ 04	0.066	-0.00 + 0.34*tau	****** + *******tau	0.13 + 0.19*tau	****** + *******tau	-1	-1	-1.00-	-999	-999	999
9	corr1_fclimstrong_nocloud	Aqua	All	243	253	57	4	0.67	0.72	30/ 65/ 04	52/ 44/ 02	50/ 49/ 00	50/ 50/ 00	42/ 54/ 03	0.058	-0.00 + 0.36*tau	****** + *******tau	0.10 + 0.25*tau	****** + *******tau	-1	-1	-1.00-	-999	-999	999
9	corr2_fmatchedweak	Aqua	All	1109	932	195	23	0.66	0.62	40/ 52/ 07	52/ 42/ 05	47/ 46/ 06	13/ 82/ 04	45/ 48/ 06	0.077	0.00 + 0.37*tau	****** + *******tau	0.13 + 0.19*tau	****** + *******tau	-1	-1	-1	0.344	0.488	0.488
9	corr2_fmatchedweak_nocloud	Aqua	All	1047	805	156	18	0.65	0.65	43/ 50/ 05	54/ 41/ 04	54/ 41/ 04	16/ 83/ 00	48/ 46/ 04	0.074	0.01 + 0.37*tau	****** + *******tau	0.12 + 0.24*tau	****** + *******tau	-1	-1	-1	0.315	0.558	0.558
9	corr2_fmatchedstrong	Aqua	All	458	440	106	9	0.64	0.62	26/ 64/ 09	59/ 37/ 03	50/ 45/ 03	22/ 66/ 11	43/ 50/ 06	0.065	-0.01 + 0.39*tau	****** + *******tau	0.15 + 0.19*tau	****** + *******tau	-1	-1	-1.00-	-999	-999	999
9	corr2_fmatchedstrong_noclou	Aqua	All	397	382	82	7	0.64	0.67	30/ 61/ 07	60/ 36/ 03	58/ 37/ 03	28/ 71/ 00	46/ 48/ 05	0.062	-0.00 + 0.39*tau	****** + *******tau	0.15 + 0.20*tau	****** + *******tau	-1	-1	-1.00-	-999	-999	999
10	raw_nobuddy	Terra	All	10	48	21	0	1.48	0.72	00/ 30/ 70	00/ 27/ 72	00/ 14/ 85	00/ 00/ 00	00/ 24/ 75	0.173	****** + *******tau	****** + *******tau	****** + *******tau	****** + *******tau	-1	-1	-1.00-	-999	-999	999
10	raw_nosdcheck	Terra	All	9	48	20	0	1.47	0.73	00/ 33/ 66	00/ 27/ 72	00/ 15/ 85	00/ 00/ 00	00/ 24/ 75	0.175	****** + *******tau	****** + *******tau	****** + *******tau	****** + *******tau	-1	-1	-1.00-	-999	-999	999
10	raw	Terra	All	5	36	6	0	1.41	0.54	00/ 40/ 60	00/ 30/ 69	00/ 16/ 83	00/ 00/ 00	00/ 29/ 70	0.184	****** + *******tau	****** + *******tau	****** + *******tau	****** + *******tau	-1	-1	-1.00-	-999	-999	999
10	raw_fqa	Terra	All	0	3	0	0	1.69	1	00/ 00/ 00	00/ 66/ 33	00/ 00/ 00	00/ 00/ 00	00/ 66/ 33	0.121	****** + *******tau	****** + *******tau	****** + *******tau	****** + *******tau	-1	-1	-1.00-	-999	-999	999
10	raw_fqa_nocloud	Terra	All	0	3	0	0	1.69	1	00/ 00/ 00	00/ 66/ 33	00/ 00/ 00	00/ 00/ 00	00/ 66/ 33	0.121	****** + *******tau	****** + *******tau	****** + *******tau	****** + *******tau	-1	-1	-1.00-	-999	-999	999
10	nocorr_fmatchedweak	Terra	All	0	3	0	0	1.69	1	00/ 00/ 00	00/ 66/ 33	00/ 00/ 00	00/ 00/ 00	00/ 66/ 33	0.121	****** + *******tau	****** + *******tau	****** + *******tau	****** + *******tau	-1	-1	-1.00-	-999	-999	999
10	nocorr_fmatchedweak_nocloud	Terra	All	0	3	0	0	1.69	1	00/ 00/ 00	00/ 66/ 33	00/ 00/ 00	00/ 00/ 00	00/ 66/ 33	0.121	****** + *******tau	****** + *******tau	****** + *******tau	****** + *******tau	-1	-1	-1.00-	-999	-999	999
10	albcorr_fmatchedweak	Terra	All	1	1	0	0	-999	-999	00/100/ 00	00/ 00/100	00/ 00/ 00	00/ 00/ 00	00/ 50/ 50	0.086	****** + *******tau	****** + *******tau	****** + *******tau	****** + *******tau	-1	-1	-1.00-	-999	-999	999
10	albcorr_fmatchedweak_noclou	Terra	All	1	1	0	0	-999	-999	00/100/ 00	00/ 00/100	00/ 00/ 00	00/ 00/ 00	00/ 50/ 50	0.086	****** + *******tau	****** + *******tau	****** + *******tau	****** + *******tau	-1	-1	-1.00-	-999	-999	999
10	corr2_fmatchedweak	Terra	All	1	1	0	0	-999	-999	00/100/ 00	00/ 00/100	00/ 00/ 00	00/ 00/ 00	00/ 50/ 50	0.181	****** + *******tau	****** + *******tau	****** + *******tau	****** + *******tau	-1	-1	-1.00-	-999	-999	999
10	corr2_fmatchedweak_nocloud	Terra	All	1	1	0	0	-999	-999	00/100/ 00	00/ 00/100	00/ 00/ 00	00/ 00/ 00	00/ 50/ 50	0.181	****** + *******tau	****** + *******tau	****** + *******tau	****** + *******tau	-1	-1	-1.00-	-999	-999	999
10	raw_nobuddy	Aqua	All	3	25	3	0	1.42	0.42	00/ 33/ 66	00/ 36/ 64	00/ 00/100	00/ 00/ 00	00/ 32/ 67	0.199	****** + *******tau	****** + *******tau	****** + *******tau	****** + *******tau	-1	-1	-1.00-	-999	-999	999
10	raw_nosdcheck	Aqua	All	3	25	3	0	1.42	0.41	00/ 33/ 66	00/ 36/ 64	00/ 00/100	00/ 00/ 00	00/ 32/ 67	0.198	****** + *******tau	****** + *******tau	****** + *******tau	****** + *******tau	-1	-1	-1.00-	-999	-999	999
10	raw	Aqua	All	3	17	2	0	1.39	0.5	00/ 33/ 66	00/ 35/ 64	00/ 00/100	00/ 00/ 00	00/ 31/ 68	0.203	****** + *******tau	****** + *******tau	****** + *******tau	****** + *******tau	-1	-1	-1.00-	-999	-999	999
11	raw_nobuddy	Terra	All	11728	6484	364	3	1.13	0.37	09/ 82/ 08	03/ 58/ 38	01/ 28/ 69	00/ 00/100	06/ 73/ 19	0.084	0.02 + 0.23*tau	****** + *******tau	-0.02 + 0.37*tau	****** + *******tau	-1	-1	-1.00-	-999	-999	999
11	raw_nosdcheck	Terra	All	11662	6356	347	2	1.12	0.37	09/ 82/ 07	03/ 59/ 37	01/ 30/ 68	00/ 00/100	06/ 73/ 19	0.081	0.02 + 0.22*tau	****** + *******tau	-0.02 + 0.36*tau	****** + *******tau	-1	-1	-1.00-	-999	-999	999
11	raw	Terra	All	11233	6016	311	1	1.11	0.39	08/ 83/ 07	03/ 60/ 35	01/ 33/ 64	00/ 00/100	06/ 75/ 18	0.078	0.02 + 0.22*tau	****** + *******tau	-0.01 + 0.35*tau	****** + *******tau	-1	-1	-1.00-	-999	-999	999
11	raw_fqa	Terra	All	8386	3392	166	1	1.04	0.45	10/ 84/ 04	04/ 70/ 24	01/ 42/ 56	00/ 00/100	08/ 80/ 10	0.062	0.01 + 0.25*tau	****** + *******tau	-0.01 + 0.28*tau	****** + *******tau	-1	-1	-1.00-	-999	-999	999
11	raw_fqa_nocloud	Terra	All	7967	2974	139	1	1.03	0.47	11/ 84/ 04	05/ 72/ 22	00/ 45/ 53	00/ 00/100	09/ 80/ 09	0.058	0.01 + 0.24*tau	****** + *******tau	-0.00 + 0.26*tau	****** + *******tau	-1	-1	-1.00-	-999	-999	999
11	nocorr_fmatchedweak	Terra	All	8071	3245	159	1	1.04	0.46	10/ 84/ 04	04/ 71/ 23	01/ 43/ 55	00/ 00/100	09/ 80/ 10	0.061	0.01 + 0.25*tau	****** + *******tau	-0.01 + 0.28*tau	****** + *******tau	-1	-1	-1.00-	-999	-999	999
11	nocorr_fmatchedweak_nocloud	Terra	All	7688	2846	132	1	1.02	0.47	11/ 84/ 03	05/ 73/ 21	00/ 45/ 53	00/ 00/100	09/ 81/ 08	0.057	0.01 + 0.24*tau	****** + *******tau	-0.00 + 0.26*tau	****** + *******tau	-1	-1	-1.00-	-999	-999	999
11	nocorr_fmatchedstrong	Terra	All	6547	1962	75	0	0.98	0.4	14/ 84/ 01	06/ 76/ 17	00/ 52/ 48	00/ 00/ 00	12/ 82/ 05	0.056	0.00 + 0.26*tau	****** + *******tau	-0.00 + 0.25*tau	****** + *******tau	-1	-1	-1.00-	-999	-999	999
11	nocorr_fmatchedstrong_noclo	Terra	All	6125	1649	60	0	0.96	0.43	14/ 83/ 01	06/ 79/ 14	00/ 56/ 43	00/ 00/ 00	13/ 82/ 04	0.053	0.00 + 0.27*tau	****** + *******tau	0.01 + 0.22*tau	****** + *******tau	-1	-1	-1.00-	-999	-999	999
11	nocorr_fclimweak	Terra	All	8076	3087	148	1	1.02	0.45	11/ 85/ 03	04/ 73/ 21	01/ 45/ 52	00/ 00/100	09/ 81/ 09	0.059	0.01 + 0.24*tau	****** + *******tau	-0.01 + 0.28*tau	****** + *******tau	-1	-1	-1.00-	-999	-999	999
11	nocorr_fclimweak_nocloud	Terra	All	7630	2700	123	1	1.01	0.47	12/ 84/ 03	05/ 76/ 18	00/ 49/ 49	00/ 00/100	10/ 82/ 07	0.055	0.00 + 0.25*tau	****** + *******tau	-0.01 + 0.28*tau	****** + *******tau	-1	-1	-1.00-	-999	-999	999
11	nocorr_fclimstrong	Terra	All	5547	1648	66	0	0.96	0.4	15/ 83/ 01	06/ 78/ 15	01/ 54/ 43	00/ 00/ 00	13/ 82/ 04	0.056	0.00 + 0.27*tau	****** + *******tau	-0.00 + 0.25*tau	****** + *******tau	-1	-1	-1.00-	-999	-999	999
11	nocorr_fclimstrong_nocloud	Terra	All	5139	1371	51	0	0.94	0.45	16/ 83/ 00	07/ 80/ 12	01/ 60/ 37	00/ 00/ 00	14/ 82/ 03	0.053	-0.00 + 0.28*tau	****** + *******tau	0.01 + 0.20*tau	****** + *******tau	-1	-1	-1.00-	-999	-999	999
11	albcorr_fmatchedweak	Terra	All	8100	3232	160	1	1.03	0.46	07/ 88/ 04	04/ 73/ 21	01/ 42/ 56	00/ 00/100	06/ 83/ 09	0.056	0.00 + 0.26*tau	****** + *******tau	-0.01 + 0.28*tau	****** + *******tau	-1	-1	-1.00-	-999	-999	999
11	albcorr_fmatchedweak_noclou	Terra	All	7721	2832	132	1	1.02	0.48	08/ 88/ 03	04/ 76/ 18	00/ 45/ 53	00/ 00/100	07/ 84/ 07	0.052	-0.00 + 0.26*tau	****** + *******tau	-0.01 + 0.27*tau	****** + *******tau	-1	-1	-1.00-	-999	-999	999
11	albcorr_fmatchedstrong	Terra	All	6200	2321	75	0	1.01	0.42	07/ 89/ 03	04/ 74/ 21	00/ 52/ 48	00/ 00/ 00	06/ 85/ 08	0.053	0.00 + 0.25*tau	****** + *******tau	-0.00 + 0.26*tau	****** + *******tau	-1	-1	-1.00-	-999	-999	999
11	albcorr_fmatchedstrong_nocl	Terra	All	5827	1952	61	0	0.99	0.46	07/ 89/ 02	04/ 77/ 17	00/ 57/ 42	00/ 00/ 00	06/ 86/ 06	0.048	-0.00 + 0.26*tau	****** + *******tau	0.00 + 0.23*tau	****** + *******tau	-1	-1	-1.00-	-999	-999	999
11	albcorr_fclimweak	Terra	All	7821	3361	151	1	1.04	0.46	06/ 88/ 04	03/ 73/ 22	01/ 43/ 54	00/ 00/100	05/ 83/ 10	0.057	0.00 + 0.24*tau	****** + *******tau	-0.01 + 0.29*tau	****** + *******tau	-1	-1	-1.00-	-999	-999	999
11	albcorr_fclimweak_nocloud	Terra	All	7425	2921	125	1	1.02	0.48	07/ 89/ 03	04/ 76/ 18	00/ 46/ 52	00/ 00/100	06/ 85/ 08	0.052	0.00 + 0.25*tau	****** + *******tau	-0.01 + 0.26*tau	****** + *******tau	-1	-1	-1.00-	-999	-999	999
11	albcorr_fclimstrong	Terra	All	5108	2077	83	0	1.02	0.44	05/ 90/ 03	04/ 75/ 20	01/ 45/ 53	00/ 00/ 00	05/ 85/ 08	0.053	-0.00 + 0.26*tau	****** + *******tau	-0.01 + 0.27*tau	****** + *******tau	-1	-1	-1.00-	-999	-999	999
11	albcorr_fclimstrong_nocloud	Terra	All	4737	1772	63	0	1	0.49	06/ 91/ 02	04/ 78/ 16	01/ 50/ 47	00/ 00/ 00	05/ 87/ 06	0.047	-0.01 + 0.26*tau	****** + *******tau	-0.00 + 0.23*tau	****** + *******tau	-1	-1	-1.00-	-999	-999	999
11	corr1_fclimweak	Terra	All	7821	3361	151	1	1.04	0.46	06/ 88/ 04	03/ 73/ 22	01/ 43/ 54	00/ 00/100	05/ 83/ 10	0.057	0.00 + 0.24*tau	****** + *******tau	-0.01 + 0.29*tau	****** + *******tau	-1	-1	-1.00-	-999	-999	999
11	corr1_fclimweak_nocloud	Terra	All	7425	2921	125	1	1.02	0.48	07/ 89/ 03	04/ 76/ 18	00/ 46/ 52	00/ 00/100	06/ 85/ 08	0.052	0.00 + 0.25*tau	****** + *******tau	-0.01 + 0.26*tau	****** + *******tau	-1	-1	-1.00-	-999	-999	999
11	corr1_fclimstrong	Terra	All	5108	2077	83	0	1.02	0.44	05/ 90/ 03	04/ 75/ 20	01/ 45/ 53	00/ 00/ 00	05/ 85/ 08	0.053	-0.00 + 0.26*tau	****** + *******tau	-0.01 + 0.27*tau	****** + *******tau	-1	-1	-1.00-	-999	-999	999
11	corr1_fclimstrong_nocloud	Terra	All	4737	1772	63	0	1	0.49	06/ 91/ 02	04/ 78/ 16	01/ 50/ 47	00/ 00/ 00	05/ 87/ 06	0.047	-0.01 + 0.26*tau	****** + *******tau	-0.00 + 0.23*tau	****** + *******tau	-1	-1	-1.00-	-999	-999	999
11	corr2_fmatchedweak	Terra	All	8100	3232	160	1	1.03	0.46	07/ 88/ 04	04/ 73/ 21	01/ 42/ 56	00/ 00/100	06/ 83/ 09	0.056	0.00 + 0.26*tau	****** + *******tau	-0.01 + 0.28*tau	****** + *******tau	-1	-1	-1.00-	-999	-999	999
11	corr2_fmatchedweak_nocloud	Terra	All	7721	2832	132	1	1.02	0.48	08/ 88/ 03	04/ 76/ 18	00/ 45/ 53	00/ 00/100	07/ 84/ 07	0.052	-0.00 + 0.26*tau	****** + *******tau	-0.01 + 0.27*tau	****** + *******tau	-1	-1	-1.00-	-999	-999	999
11	corr2_fmatchedstrong	Terra	All	6200	2321	75	0	1.01	0.42	07/ 89/ 03	04/ 74/ 21	00/ 52/ 48	00/ 00/ 00	06/ 85/ 08	0.053	0.00 + 0.25*tau	****** + *******tau	-0.00 + 0.26*tau	****** + *******tau	-1	-1	-1.00-	-999	-999	999
11	corr2_fmatchedstrong_noclou	Terra	All	5827	1952	61	0	0.99	0.46	07/ 89/ 02	04/ 77/ 17	00/ 57/ 42	00/ 00/ 00	06/ 86/ 06	0.048	-0.00 + 0.26*tau	****** + *******tau	0.00 + 0.23*tau	****** + *******tau	-1	-1	-1.00-	-999	-999	999
11	raw_nobuddy	Aqua	All	10043	6633	402	3	1.19	0.39	07/ 83/ 09	01/ 52/ 45	01/ 31/ 66	00/ 66/ 33	05/ 70/ 24	0.09	0.04 + 0.20*tau	****** + *******tau	-0.02 + 0.39*tau	****** + *******tau	-1	-1	-1.00-	-999	-999	999
11	raw_nosdcheck	Aqua	All	9949	6486	390	3	1.19	0.4	07/ 83/ 09	01/ 53/ 44	01/ 32/ 65	00/ 33/ 66	05/ 70/ 24	0.089	0.03 + 0.22*tau	****** + *******tau	-0.02 + 0.38*tau	****** + *******tau	-1	-1	-1.00-	-999	-999	999
11	raw	Aqua	All	9463	6084	342	3	1.17	0.4	06/ 84/ 08	02/ 54/ 43	01/ 33/ 64	00/ 33/ 66	04/ 71/ 23	0.086	0.03 + 0.20*tau	****** + *******tau	-0.02 + 0.38*tau	****** + *******tau	-1	-1	-1.00-	-999	-999	999
11	raw_fqa	Aqua	All	6702	3223	156	2	1.07	0.45	08/ 86/ 04	03/ 66/ 29	02/ 42/ 54	00/ 50/ 50	07/ 79/ 13	0.065	0.01 + 0.25*tau	****** + *******tau	-0.01 + 0.31*tau	****** + *******tau	-1	-1	-1.00-	-999	-999	999
11	raw_fqa_nocloud	Aqua	All	6356	2831	119	3	1.06	0.47	09/ 86/ 04	03/ 68/ 27	02/ 46/ 51	00/ 33/ 66	07/ 80/ 11	0.062	0.00 + 0.27*tau	****** + *******tau	-0.01 + 0.29*tau	****** + *******tau	-1	-1	-1.00-	-999	-999	999
11	nocorr_fmatchedweak	Aqua	All	6504	3097	150	3	1.07	0.47	08/ 86/ 04	03/ 67/ 28	02/ 44/ 54	00/ 33/ 66	07/ 80/ 12	0.065	0.01 + 0.25*tau	****** + *******tau	-0.01 + 0.31*tau	****** + *******tau	-1	-1	-1.00-	-999	-999	999
11	nocorr_fmatchedweak_nocloud	Aqua	All	6160	2720	114	3	1.05	0.47	09/ 86/ 03	03/ 69/ 26	01/ 47/ 50	00/ 33/ 66	07/ 80/ 11	0.062	0.00 + 0.26*tau	****** + *******tau	-0.02 + 0.31*tau	****** + *******tau	-1	-1	-1.00-	-999	-999	999
11	nocorr_fmatchedstrong	Aqua	All	5336	1903	62	0	1.01	0.45	10/ 87/ 01	04/ 75/ 19	03/ 45/ 51	00/ 00/ 00	09/ 83/ 06	0.053	-0.02 + 0.31*tau	****** + *******tau	-0.00 + 0.25*tau	****** + *******tau	-1	-1	-1.00-	-999	-999	999
11	nocorr_fmatchedstrong_noclo	Aqua	All	4997	1587	39	0	0.98	0.45	11/ 86/ 01	05/ 78/ 16	05/ 46/ 48	00/ 00/ 00	10/ 84/ 05	0.05	-0.02 + 0.32*tau	****** + *******tau	-0.00 + 0.24*tau	****** + *******tau	-1	-1	-1.00-	-999	-999	999
11	nocorr_fclimweak	Aqua	All	6498	2964	139	3	1.05	0.45	09/ 86/ 04	03/ 70/ 26	02/ 45/ 51	00/ 33/ 66	07/ 80/ 11	0.062	0.01 + 0.24*tau	****** + *******tau	-0.03 + 0.34*tau	****** + *******tau	-1	-1	-1.00-	-999	-999	999
11	nocorr_fclimweak_nocloud	Aqua	All	6151	2577	107	3	1.03	0.45	10/ 86/ 03	03/ 71/ 24	02/ 46/ 50	00/ 33/ 66	08/ 81/ 10	0.059	0.00 + 0.27*tau	****** + *******tau	-0.02 + 0.32*tau	****** + *******tau	-1	-1	-1.00-	-999	-999	999
11	nocorr_fclimstrong	Aqua	All	4535	1540	42	0	0.98	0.44	12/ 86/ 01	05/ 77/ 16	02/ 40/ 57	00/ 00/ 00	10/ 83/ 05	0.051	-0.02 + 0.32*tau	****** + *******tau	0.01 + 0.22*tau	****** + *******tau	-1	-1	-1.00-	-999	-999	999
11	nocorr_fclimstrong_nocloud	Aqua	All	4189	1248	29	0	0.96	0.44	13/ 85/ 01	06/ 81/ 12	03/ 48/ 48	00/ 00/ 00	11/ 84/ 03	0.049	-0.01 + 0.28*tau	****** + *******tau	0.00 + 0.22*tau	****** + *******tau	-1	-1	-1.00-	-999	-999	999
11	albcorr_fmatchedweak	Aqua	All	6453	3152	156	3	1.07	0.48	06/ 89/ 03	03/ 71/ 25	01/ 43/ 54	00/ 33/ 66	05/ 82/ 11	0.06	0.00 + 0.26*tau	****** + *******tau	-0.01 + 0.30*tau	****** + *******tau	-1	-1	-1.00-	-999	-999	999
11	albcorr_fmatchedweak_noclou	Aqua	All	6169	2720	115	3	1.04	0.48	07/ 89/ 03	03/ 73/ 22	01/ 47/ 50	00/ 33/ 66	05/ 84/ 09	0.056	-0.00 + 0.27*tau	****** + *******tau	-0.02 + 0.30*tau	****** + *******tau	-1	-1	-1.00-	-999	-999	999
11	albcorr_fmatchedstrong	Aqua	All	4977	2271	65	0	1.04	0.46	05/ 90/ 03	03/ 73/ 23	03/ 47/ 49	00/ 00/ 00	05/ 84/ 10	0.053	-0.01 + 0.29*tau	****** + *******tau	-0.00 + 0.25*tau	****** + *******tau	-1	-1	-1.00-	-999	-999	999
11	albcorr_fmatchedstrong_nocl	Aqua	All	4719	1871	40	0	1.02	0.47	06/ 90/ 03	03/ 77/ 19	05/ 47/ 47	00/ 00/ 00	05/ 86/ 07	0.048	-0.00 + 0.25*tau	****** + *******tau	-0.01 + 0.25*tau	****** + *******tau	-1	-1	-1.00-	-999	-999	999
11	albcorr_fclimweak	Aqua	All	6234	3246	142	3	1.07	0.47	06/ 88/ 05	02/ 69/ 27	02/ 44/ 53	00/ 33/ 66	04/ 81/ 13	0.061	0.01 + 0.22*tau	****** + *******tau	-0.01 + 0.30*tau	****** + *******tau	-1	-1	-1.00-	-999	-999	999
11	albcorr_fclimweak_nocloud	Aqua	All	5959	2788	107	3	1.05	0.48	06/ 89/ 04	03/ 73/ 23	01/ 47/ 50	00/ 33/ 66	05/ 83/ 10	0.056	-0.00 + 0.26*tau	****** + *******tau	-0.01 + 0.29*tau	****** + *******tau	-1	-1	-1.00-	-999	-999	999
11	albcorr_fclimstrong	Aqua	All	4126	1947	54	0	1.05	0.47	05/ 90/ 04	03/ 72/ 23	00/ 44/ 55	00/ 00/ 00	04/ 84/ 10	0.052	0.00 + 0.23*tau	****** + *******tau	-0.01 + 0.26*tau	****** + *******tau	-1	-1	-1.00-	-999	-999	999
11	albcorr_fclimstrong_nocloud	Aqua	All	3845	1599	36	0	1.03	0.48	05/ 91/ 03	03/ 77/ 19	00/ 50/ 50	00/ 00/ 00	04/ 87/ 08	0.046	-0.01 + 0.29*tau	****** + *******tau	-0.00 + 0.23*tau	****** + *******tau	-1	-1	-1.00-	-999	-999	999
11	corr1_fclimweak	Aqua	All	6234	3246	142	3	1.07	0.47	06/ 88/ 05	02/ 69/ 27	02/ 44/ 53	00/ 33/ 66	04/ 81/ 13	0.061	0.01 + 0.22*tau	****** + *******tau	-0.01 + 0.30*tau	****** + *******tau	-1	-1	-1.00-	-999	-999	999
11	corr1_fclimweak_nocloud	Aqua	All	5959	2788	107	3	1.05	0.48	06/ 89/ 04	03/ 73/ 23	01/ 47/ 50	00/ 33/ 66	05/ 83/ 10	0.056	-0.00 + 0.26*tau	****** + *******tau	-0.01 + 0.29*tau	****** + *******tau	-1	-1	-1.00-	-999	-999	999
11	corr1_fclimstrong	Aqua	All	4126	1947	54	0	1.05	0.47	05/ 90/ 04	03/ 72/ 23	00/ 44/ 55	00/ 00/ 00	04/ 84/ 10	0.052	0.00 + 0.23*tau	****** + *******tau	-0.01 + 0.26*tau	****** + *******tau	-1	-1	-1.00-	-999	-999	999
11	corr1_fclimstrong_nocloud	Aqua	All	3845	1599	36	0	1.03	0.48	05/ 91/ 03	03/ 77/ 19	00/ 50/ 50	00/ 00/ 00	04/ 87/ 08	0.046	-0.01 + 0.29*tau	****** + *******tau	-0.00 + 0.23*tau	****** + *******tau	-1	-1	-1.00-	-999	-999	999
11	corr2_fmatchedweak	Aqua	All	6453	3152	156	3	1.07	0.48	06/ 89/ 03	03/ 71/ 25	01/ 43/ 54	00/ 33/ 66	05/ 82/ 11	0.06	0.00 + 0.26*tau	****** + *******tau	-0.01 + 0.30*tau	****** + *******tau	-1	-1	-1.00-	-999	-999	999
11	corr2_fmatchedweak_nocloud	Aqua	All	6169	2720	115	3	1.04	0.48	07/ 89/ 03	03/ 73/ 22	01/ 47/ 50	00/ 33/ 66	05/ 84/ 09	0.056	-0.00 + 0.27*tau	****** + *******tau	-0.02 + 0.30*tau	****** + *******tau	-1	-1	-1.00-	-999	-999	999
11	corr2_fmatchedstrong	Aqua	All	4977	2271	65	0	1.04	0.46	05/ 90/ 03	03/ 73/ 23	03/ 47/ 49	00/ 00/ 00	05/ 84/ 10	0.053	-0.01 + 0.29*tau	****** + *******tau	-0.00 + 0.25*tau	****** + *******tau	-1	-1	-1.00-	-999	-999	999
11	corr2_fmatchedstrong_noclou	Aqua	All	4719	1871	40	0	1.02	0.47	06/ 90/ 03	03/ 77/ 19	05/ 47/ 47	00/ 00/ 00	05/ 86/ 07	0.048	-0.00 + 0.25*tau	****** + *******tau	-0.01 + 0.25*tau	****** + *******tau	-1	-1	-1.00-	-999	-999	999
12	raw_nobuddy	Terra	All	4294	2197	154	5	1.09	0.48	08/ 85/ 05	03/ 65/ 31	00/ 49/ 50	00/ 40/ 60	06/ 78/ 15	0.075	0.02 + 0.21*tau	****** + *******tau	0.01 + 0.26*tau	****** + *******tau	-1	-1	-1.00-	-999	-999	999
12	raw_nosdcheck	Terra	All	4235	2121	147	5	1.08	0.49	08/ 86/ 04	03/ 66/ 29	00/ 51/ 48	00/ 40/ 60	07/ 78/ 14	0.072	0.01 + 0.24*tau	****** + *******tau	0.00 + 0.26*tau	****** + *******tau	-1	-1	-1.00-	-999	-999	999
12	raw	Terra	All	3986	1989	137	5	1.07	0.5	08/ 87/ 04	03/ 68/ 27	00/ 53/ 45	00/ 40/ 60	06/ 80/ 12	0.069	0.01 + 0.24*tau	****** + *******tau	0.01 + 0.25*tau	****** + *******tau	-1	-1	-1.00-	-999	-999	999
12	raw_fqa	Terra	All	3107	1253	80	3	1	0.58	13/ 85/ 01	05/ 81/ 13	01/ 60/ 38	00/ 00/100	10/ 83/ 05	0.055	0.02 + 0.18*tau	****** + *******tau	0.01 + 0.17*tau	****** + *******tau	-1	-1	-1.00-	-999	-999	999
12	raw_fqa_nocloud	Terra	All	2913	1075	63	3	0.98	0.63	14/ 84/ 00	05/ 84/ 10	00/ 66/ 33	00/ 00/100	11/ 84/ 03	0.053	0.03 + 0.14*tau	****** + *******tau	0.02 + 0.13*tau	****** + *******tau	-1	-1	-1.00-	-999	-999	999
12	nocorr_fmatchedweak	Terra	All	2820	1127	72	3	1	0.56	13/ 85/ 01	05/ 81/ 13	01/ 58/ 40	00/ 00/100	11/ 83/ 05	0.055	0.01 + 0.20*tau	****** + *******tau	0.01 + 0.19*tau	****** + *******tau	-1	-1	-1.00-	-999	-999	999
12	nocorr_fmatchedweak_nocloud	Terra	All	2639	961	57	3	0.98	0.6	15/ 83/ 00	06/ 84/ 09	00/ 61/ 38	00/ 00/100	12/ 83/ 03	0.053	0.02 + 0.17*tau	****** + *******tau	0.02 + 0.16*tau	****** + *******tau	-1	-1	-1.00-	-999	-999	999
12	nocorr_fmatchedstrong	Terra	All	2598	942	56	2	0.97	0.59	16/ 82/ 00	06/ 84/ 09	00/ 64/ 35	00/ 00/100	13/ 82/ 03	0.055	0.02 + 0.19*tau	****** + *******tau	0.02 + 0.16*tau	****** + *******tau	-1	-1	-1.00-	-999	-999	999
12	nocorr_fmatchedstrong_noclo	Terra	All	2407	791	42	2	0.95	0.65	18/ 81/ 00	07/ 85/ 06	00/ 71/ 28	00/ 00/100	15/ 82/ 02	0.054	0.01 + 0.21*tau	****** + *******tau	0.02 + 0.13*tau	****** + *******tau	-1	-1	-1.00-	-999	-999	999
12	nocorr_fclimweak	Terra	All	2897	1152	74	4	1	0.58	14/ 84/ 01	05/ 82/ 11	00/ 62/ 37	00/ 25/ 75	11/ 83/ 04	0.055	0.02 + 0.16*tau	****** + *******tau	0.01 + 0.17*tau	****** + *******tau	-1	-1	-1.00-	-999	-999	999
12	nocorr_fclimweak_nocloud	Terra	All	2701	964	59	4	0.98	0.64	15/ 83/ 00	05/ 85/ 09	00/ 71/ 28	00/ 25/ 75	12/ 83/ 03	0.053	0.03 + 0.14*tau	****** + *******tau	0.02 + 0.13*tau	****** + *******tau	-1	-1	-1.00-	-999	-999	999
12	nocorr_fclimstrong	Terra	All	2271	775	42	2	0.95	0.62	20/ 78/ 00	07/ 83/ 09	02/ 76/ 21	00/ 00/100	17/ 79/ 03	0.058	0.03 + 0.17*tau	****** + *******tau	0.02 + 0.14*tau	****** + *******tau	-1	-1	-1.00-	-999	-999	999
12	nocorr_fclimstrong_nocloud	Terra	All	2087	635	33	2	0.93	0.69	22/ 77/ 00	08/ 85/ 06	03/ 81/ 15	00/ 00/100	18/ 78/ 02	0.057	0.03 + 0.16*tau	****** + *******tau	0.03 + 0.12*tau	****** + *******tau	-1	-1	-1.00-	-999	-999	999
12	albcorr_fmatchedweak	Terra	All	2681	1277	72	3	1.02	0.56	06/ 90/ 02	04/ 80/ 15	01/ 58/ 40	00/ 00/100	06/ 86/ 07	0.051	0.01 + 0.21*tau	****** + *******tau	0.01 + 0.20*tau	****** + *******tau	-1	-1	-1.00-	-999	-999	999
12	albcorr_fmatchedweak_noclou	Terra	All	2525	1080	58	3	1.01	0.62	07/ 90/ 01	04/ 83/ 11	00/ 62/ 37	00/ 00/100	06/ 88/ 05	0.046	0.01 + 0.18*tau	****** + *******tau	0.01 + 0.17*tau	****** + *******tau	-1	-1	-1.00-	-999	-999	999
12	albcorr_fmatchedstrong	Terra	All	2406	1139	56	2	1.01	0.6	06/ 91/ 02	04/ 81/ 13	00/ 64/ 35	00/ 00/100	05/ 87/ 06	0.049	0.01 + 0.19*tau	****** + *******tau	0.01 + 0.18*tau	****** + *******tau	-1	-1	-1.00-	-999	-999	999
12	albcorr_fmatchedstrong_nocl	Terra	All	2257	943	44	2	0.99	0.66	06/ 91/ 01	05/ 84/ 10	00/ 70/ 29	00/ 00/100	06/ 88/ 04	0.044	0.01 + 0.18*tau	****** + *******tau	0.01 + 0.16*tau	****** + *******tau	-1	-1	-1.00-	-999	-999	999
12	albcorr_fclimweak	Terra	All	2687	1362	80	5	1.05	0.59	05/ 91/ 02	04/ 79/ 16	00/ 60/ 40	00/ 40/ 60	04/ 87/ 08	0.051	0.01 + 0.18*tau	****** + *******tau	0.00 + 0.21*tau	****** + *******tau	-1	-1	-1.00-	-999	-999	999
12	albcorr_fclimweak_nocloud	Terra	All	2530	1132	64	5	1.02	0.65	05/ 92/ 01	04/ 83/ 12	00/ 67/ 32	00/ 40/ 60	05/ 88/ 05	0.045	0.01 + 0.17*tau	****** + *******tau	0.01 + 0.16*tau	****** + *******tau	-1	-1	-1.00-	-999	-999	999
12	albcorr_fclimstrong	Terra	All	2075	965	49	4	1.02	0.59	06/ 91/ 02	04/ 80/ 15	00/ 63/ 36	25/ 25/ 50	05/ 87/ 06	0.05	0.01 + 0.19*tau	****** + *******tau	0.01 + 0.18*tau	****** + *******tau	-1	-1	-1.00-	-999	-999	999
12	albcorr_fclimstrong_nocloud	Terra	All	1935	778	40	4	1.01	0.66	07/ 91/ 01	05/ 83/ 11	00/ 70/ 30	25/ 25/ 50	06/ 88/ 04	0.044	0.01 + 0.18*tau	****** + *******tau	0.01 + 0.16*tau	****** + *******tau	-1	-1	-1.00-	-999	-999	999
12	corr1_fclimweak	Terra	All	2687	1362	80	5	1.05	0.59	05/ 91/ 02	04/ 79/ 16	00/ 60/ 40	00/ 40/ 60	04/ 87/ 08	0.051	0.01 + 0.18*tau	****** + *******tau	0.00 + 0.21*tau	****** + *******tau	-1	-1	-1.00-	-999	-999	999
12	corr1_fclimweak_nocloud	Terra	All	2530	1132	64	5	1.02	0.65	05/ 92/ 01	04/ 83/ 12	00/ 67/ 32	00/ 40/ 60	05/ 88/ 05	0.045	0.01 + 0.17*tau	****** + *******tau	0.01 + 0.16*tau	****** + *******tau	-1	-1	-1.00-	-999	-999	999
12	corr1_fclimstrong	Terra	All	2075	965	49	4	1.02	0.59	06/ 91/ 02	04/ 80/ 15	00/ 63/ 36	25/ 25/ 50	05/ 87/ 06	0.05	0.01 + 0.19*tau	****** + *******tau	0.01 + 0.18*tau	****** + *******tau	-1	-1	-1.00-	-999	-999	999
12	corr1_fclimstrong_nocloud	Terra	All	1935	778	40	4	1.01	0.66	07/ 91/ 01	05/ 83/ 11	00/ 70/ 30	25/ 25/ 50	06/ 88/ 04	0.044	0.01 + 0.18*tau	****** + *******tau	0.01 + 0.16*tau	****** + *******tau	-1	-1	-1.00-	-999	-999	999
12	corr2_fmatchedweak	Terra	All	2681	1277	72	3	1.02	0.56	06/ 90/ 02	04/ 80/ 15	01/ 58/ 40	00/ 00/100	06/ 86/ 07	0.051	0.01 + 0.21*tau	****** + *******tau	0.01 + 0.20*tau	****** + *******tau	-1	-1	-1.00-	-999	-999	999
12	corr2_fmatchedweak_nocloud	Terra	All	2525	1080	58	3	1.01	0.62	07/ 90/ 01	04/ 83/ 11	00/ 62/ 37	00/ 00/100	06/ 88/ 05	0.046	0.01 + 0.18*tau	****** + *******tau	0.01 + 0.17*tau	****** + *******tau	-1	-1	-1.00-	-999	-999	999
12	corr2_fmatchedstrong	Terra	All	2406	1139	56	2	1.01	0.6	06/ 91/ 02	04/ 81/ 13	00/ 64/ 35	00/ 00/100	05/ 87/ 06	0.049	0.01 + 0.19*tau	****** + *******tau	0.01 + 0.18*tau	****** + *******tau	-1	-1	-1.00-	-999	-999	999
12	corr2_fmatchedstrong_noclou	Terra	All	2257	943	44	2	0.99	0.66	06/ 91/ 01	05/ 84/ 10	00/ 70/ 29	00/ 00/100	06/ 88/ 04	0.044	0.01 + 0.18*tau	****** + *******tau	0.01 + 0.16*tau	****** + *******tau	-1	-1	-1.00-	-999	-999	999
12	raw_nobuddy	Aqua	All	3476	2163	161	6	1.13	0.48	07/ 85/ 07	02/ 59/ 38	01/ 40/ 57	00/ 16/ 83	05/ 74/ 20	0.081	0.01 + 0.25*tau	****** + *******tau	0.01 + 0.27*tau	****** + *******tau	-1	-1	-1.00-	-999	-999	999
12	raw_nosdcheck	Aqua	All	3447	2055	157	6	1.12	0.49	07/ 85/ 06	02/ 61/ 36	01/ 42/ 56	00/ 16/ 83	05/ 75/ 18	0.077	0.01 + 0.23*tau	****** + *******tau	0.01 + 0.27*tau	****** + *******tau	-1	-1	-1.00-	-999	-999	999
12	raw	Aqua	All	3266	1904	139	6	1.11	0.53	07/ 86/ 05	02/ 63/ 34	01/ 46/ 51	00/ 16/ 83	05/ 77/ 17	0.073	0.02 + 0.21*tau	****** + *******tau	0.01 + 0.25*tau	****** + *******tau	-1	-1	-1.00-	-999	-999	999
12	raw_fqa	Aqua	All	2485	1076	77	3	1.01	0.63	10/ 87/ 01	04/ 79/ 15	01/ 62/ 36	00/ 00/100	08/ 84/ 06	0.052	0.01 + 0.21*tau	****** + *******tau	0.02 + 0.15*tau	****** + *******tau	-1	-1	-1.00-	-999	-999	999
12	raw_fqa_nocloud	Aqua	All	2316	881	61	3	0.99	0.66	12/ 86/ 00	04/ 82/ 12	00/ 63/ 36	00/ 00/100	10/ 85/ 04	0.051	0.02 + 0.17*tau	****** + *******tau	0.02 + 0.13*tau	****** + *******tau	-1	-1	-1.00-	-999	-999	999
12	nocorr_fmatchedweak	Aqua	All	2285	994	60	3	1	0.61	11/ 87/ 01	04/ 78/ 16	01/ 60/ 38	00/ 00/100	09/ 84/ 06	0.053	-0.02 + 0.30*tau	****** + *******tau	0.02 + 0.16*tau	****** + *******tau	-1	-1	-1.00-	-999	-999	999
12	nocorr_fmatchedweak_nocloud	Aqua	All	2129	816	47	3	0.99	0.64	12/ 86/ 01	05/ 81/ 12	00/ 61/ 38	00/ 00/100	10/ 84/ 04	0.052	0.00 + 0.23*tau	****** + *******tau	0.02 + 0.14*tau	****** + *******tau	-1	-1	-1.00-	-999	-999	999
12	nocorr_fmatchedstrong	Aqua	All	2106	818	43	3	0.97	0.64	13/ 85/ 01	05/ 83/ 11	02/ 65/ 32	00/ 00/100	11/ 84/ 04	0.052	0.01 + 0.22*tau	****** + *******tau	0.02 + 0.15*tau	****** + *******tau	-1	-1	-1.00-	-999	-999	999
12	nocorr_fmatchedstrong_noclo	Aqua	All	1946	663	35	3	0.94	0.68	15/ 83/ 00	06/ 86/ 07	00/ 74/ 25	00/ 00/100	13/ 84/ 02	0.052	-0.02 + 0.29*tau	****** + *******tau	0.03 + 0.11*tau	****** + *******tau	-1	-1	-1.00-	-999	-999	999
12	nocorr_fclimweak	Aqua	All	2355	980	66	3	1	0.65	11/ 86/ 01	04/ 81/ 14	01/ 69/ 28	00/ 00/100	09/ 84/ 05	0.052	0.01 + 0.21*tau	****** + *******tau	0.02 + 0.14*tau	****** + *******tau	-1	-1	-1.00-	-999	-999	999
12	nocorr_fclimweak_nocloud	Aqua	All	2173	807	50	3	0.97	0.69	13/ 85/ 00	05/ 84/ 10	00/ 76/ 24	00/ 00/100	11/ 84/ 03	0.051	0.01 + 0.20*tau	****** + *******tau	0.03 + 0.12*tau	****** + *******tau	-1	-1	-1.00-	-999	-999	999
12	nocorr_fclimstrong	Aqua	All	1859	645	45	3	0.96	0.68	16/ 82/ 00	06/ 84/ 09	02/ 68/ 28	00/ 00/100	13/ 82/ 03	0.054	-0.02 + 0.30*tau	****** + *******tau	0.02 + 0.15*tau	****** + *******tau	-1	-1	-1.00-	-999	-999	999
12	nocorr_fclimstrong_nocloud	Aqua	All	1692	528	34	3	0.93	0.71	18/ 80/ 00	07/ 86/ 05	00/ 79/ 20	00/ 00/100	16/ 81/ 02	0.055	-0.01 + 0.25*tau	****** + *******tau	0.02 + 0.13*tau	****** + *******tau	-1	-1	-1.00-	-999	-999	999
12	albcorr_fmatchedweak	Aqua	All	2134	1144	61	3	1.04	0.65	05/ 91/ 03	02/ 78/ 19	01/ 59/ 39	00/ 00/100	04/ 86/ 09	0.05	-0.01 + 0.24*tau	****** + *******tau	0.02 + 0.15*tau	****** + *******tau	-1	-1	-1.00-	-999	-999	999
12	albcorr_fmatchedweak_noclou	Aqua	All	1998	949	49	3	1.02	0.66	05/ 92/ 01	03/ 81/ 15	00/ 61/ 38	00/ 00/100	04/ 88/ 06	0.045	-0.00 + 0.22*tau	****** + *******tau	0.02 + 0.16*tau	****** + *******tau	-1	-1	-1.00-	-999	-999	999
12	albcorr_fmatchedstrong	Aqua	All	1920	1005	44	3	1.02	0.66	05/ 92/ 02	02/ 79/ 17	02/ 61/ 36	00/ 00/100	04/ 87/ 08	0.048	0.00 + 0.20*tau	****** + *******tau	0.02 + 0.14*tau	****** + *******tau	-1	-1	-1.00-	-999	-999	999
12	albcorr_fmatchedstrong_nocl	Aqua	All	1793	820	36	3	0.99	0.69	05/ 92/ 02	03/ 83/ 13	00/ 69/ 30	00/ 00/100	04/ 89/ 05	0.043	-0.01 + 0.24*tau	****** + *******tau	0.03 + 0.12*tau	****** + *******tau	-1	-1	-1.00-	-999	-999	999
12	albcorr_fclimweak	Aqua	All	2159	1169	75	3	1.05	0.68	04/ 91/ 03	02/ 78/ 18	00/ 66/ 33	00/ 00/100	03/ 86/ 09	0.05	0.00 + 0.20*tau	****** + *******tau	0.02 + 0.15*tau	****** + *******tau	-1	-1	-1.00-	-999	-999	999
12	albcorr_fclimweak_nocloud	Aqua	All	2014	965	54	3	1.03	0.71	05/ 92/ 02	03/ 82/ 13	00/ 72/ 27	00/ 00/100	04/ 88/ 06	0.043	0.00 + 0.20*tau	****** + *******tau	0.01 + 0.15*tau	****** + *******tau	-1	-1	-1.00-	-999	-999	999
12	albcorr_fclimstrong	Aqua	All	1684	817	52	3	1.03	0.69	05/ 92/ 02	03/ 80/ 16	00/ 63/ 36	00/ 00/100	04/ 87/ 07	0.046	-0.02 + 0.27*tau	****** + *******tau	0.01 + 0.17*tau	****** + *******tau	-1	-1	-1.00-	-999	-999	999
12	albcorr_fclimstrong_nocloud	Aqua	All	1556	667	39	3	1	0.72	06/ 92/ 01	04/ 84/ 11	00/ 74/ 25	00/ 00/100	05/ 89/ 04	0.041	-0.01 + 0.23*tau	****** + *******tau	0.02 + 0.14*tau	****** + *******tau	-1	-1	-1.00-	-999	-999	999
12	corr1_fclimweak	Aqua	All	2159	1169	75	3	1.05	0.68	04/ 91/ 03	02/ 78/ 18	00/ 66/ 33	00/ 00/100	03/ 86/ 09	0.05	0.00 + 0.20*tau	****** + *******tau	0.02 + 0.15*tau	****** + *******tau	-1	-1	-1.00-	-999	-999	999
12	corr1_fclimweak_nocloud	Aqua	All	2014	965	54	3	1.03	0.71	05/ 92/ 02	03/ 82/ 13	00/ 72/ 27	00/ 00/100	04/ 88/ 06	0.043	0.00 + 0.20*tau	****** + *******tau	0.01 + 0.15*tau	****** + *******tau	-1	-1	-1.00-	-999	-999	999
[truncated: 296 more rows]

## Sheet: 0d_20100525
															RMSE Error Model
				Count						Compliance						Diagnostic		Prognostic		MCV
[truncated: 1,059 more rows]

## Sheet: 0e_20100602
															RMSE Error Model
[truncated: 1,022 more rows]
