# Supplementary material for: An over-land aerosol optical depth data set for data assimilation by filtering, correction, and aggregation of MODIS Collection 5 optical depth retrievals
Source: Copernicus journal article supplement (doi:10.5194/amt-4-379-2011), 2011-03-01
Supplement: Supplementary file 2 [file statpage_l2_aqua_cuiaba-miranda.pdf › aux_material_lite_rev/l2_site_pages/statpage_l2_aqua_cuiaba-miranda.pdf]

A

15.52S 56.19W CUIABA-MIRANDA

AERONET AOD: N= 12363  $\overline{\tau}=0.28$  eta=0.62

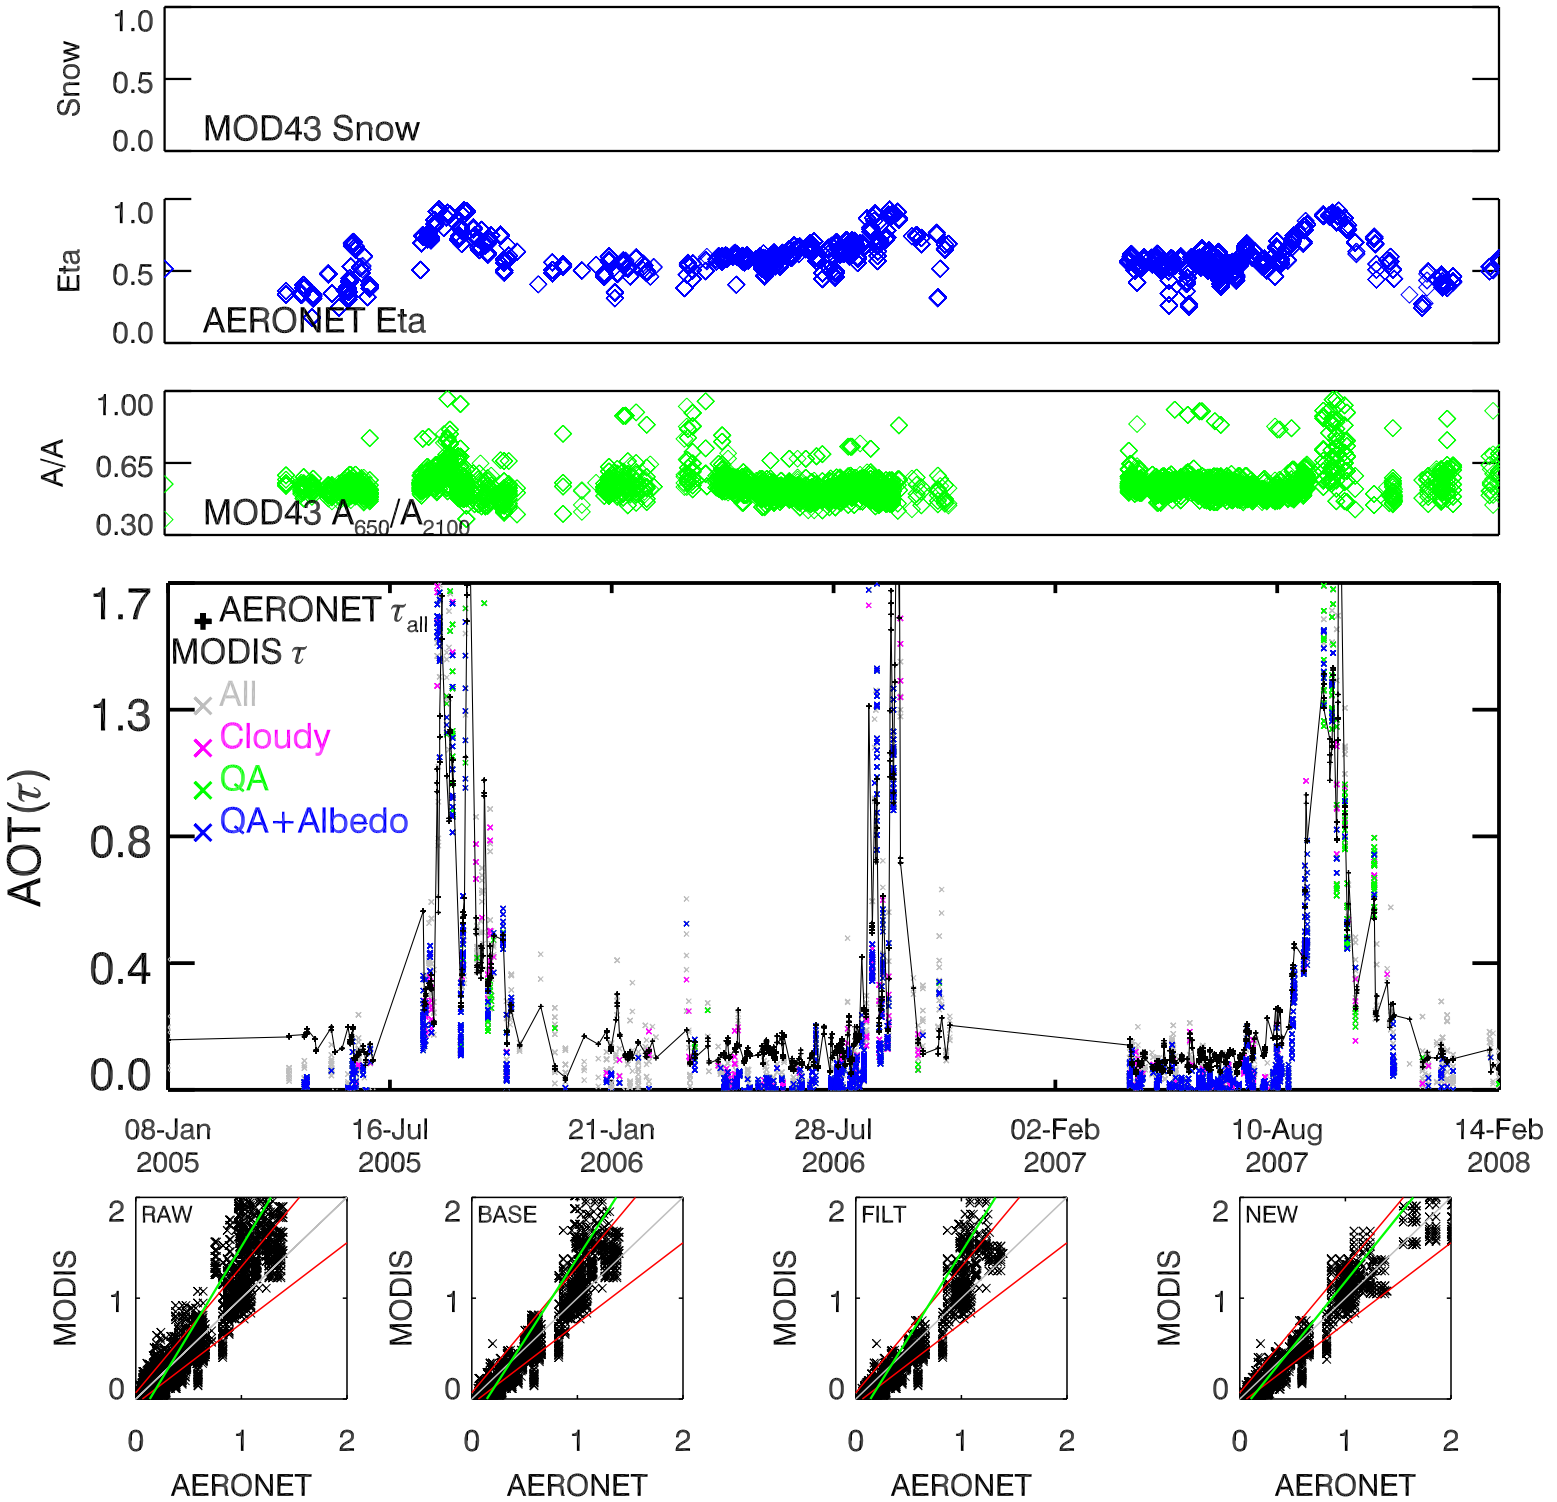

| Which | MODIS AOD  |            |       |            | MODIS-AERONET |       | % -/in/+<br>Tolerance | Regression |                |
|-------|------------|------------|-------|------------|---------------|-------|-----------------------|------------|----------------|
|       | (N=)       | Mean       | >0.2  | >1.0       | Mean Bias     | RMSE  |                       | Slope      | r <sup>2</sup> |
| RAW   | (N= 12363) | 0.261      | 0.25  | 0.09       | -0.022        | 0.324 | 57/34/ 7              | 1.029      | 0.82           |
| BASE  | (N= 7869)  | 0.205      | 0.19  | 0.07       | -0.060        | 0.292 | 72/23/ 4              | 0.989      | 0.85           |
| FILT  | (N= 8651)  | 0.185      | 0.18  | 0.06       | -0.060        | 0.289 | 71/24/ 4              | 0.979      | 0.84           |
| NEW   | (N= 8651)  | 0.188      | 0.19  | 0.06       | -0.057        | 0.173 | 49/47/ 2              | 0.994      | 0.85           |
| Which | Noise      | vs τA      |       | vs τM      |               | Est.@ | Est.@                 | Est.@      | Est.@          |
|       | Floor      | Diagnostic |       | Prognostic |               | 0.1   | 0.2                   | 0.4        | 1.0            |
| RAW   | 0.112      | 0.03 +     | 0.27τ | 0.05 +     | 0.11τ         | 0.11  | 0.11                  | 0.11       | 0.16           |
| BASE  | 0.120      | 0.09 +     | 0.12τ | 0.07 +     | 0.07τ         | 0.12  | 0.12                  | 0.12       | 0.14           |
| FILT  | 0.117      | 0.07 +     | 0.18τ | 0.07 +     | 0.08τ         | 0.12  | 0.12                  | 0.12       | 0.15           |
| NEW   | 0.088      | 0.09 +     | 0.07τ | 0.05 +     | 0.10τ         | 0.09  | 0.09                  | 0.09       | 0.15           |
