# Supplementary material for: An over-land aerosol optical depth data set for data assimilation by filtering, correction, and aggregation of MODIS Collection 5 optical depth retrievals
Source: Copernicus journal article supplement (doi:10.5194/amt-4-379-2011), 2011-03-01
Supplement: Supplementary file 3 [file statpage_l2_terra_cuiaba-miranda.pdf › aux_material_lite_rev/l2_site_pages/statpage_l2_terra_cuiaba-miranda.pdf]

T 15.52S 56.19W CUIABA-MIRANDA  
 AERONET AOD: N= 14366  $\bar{\tau}=0.24$  eta=0.59

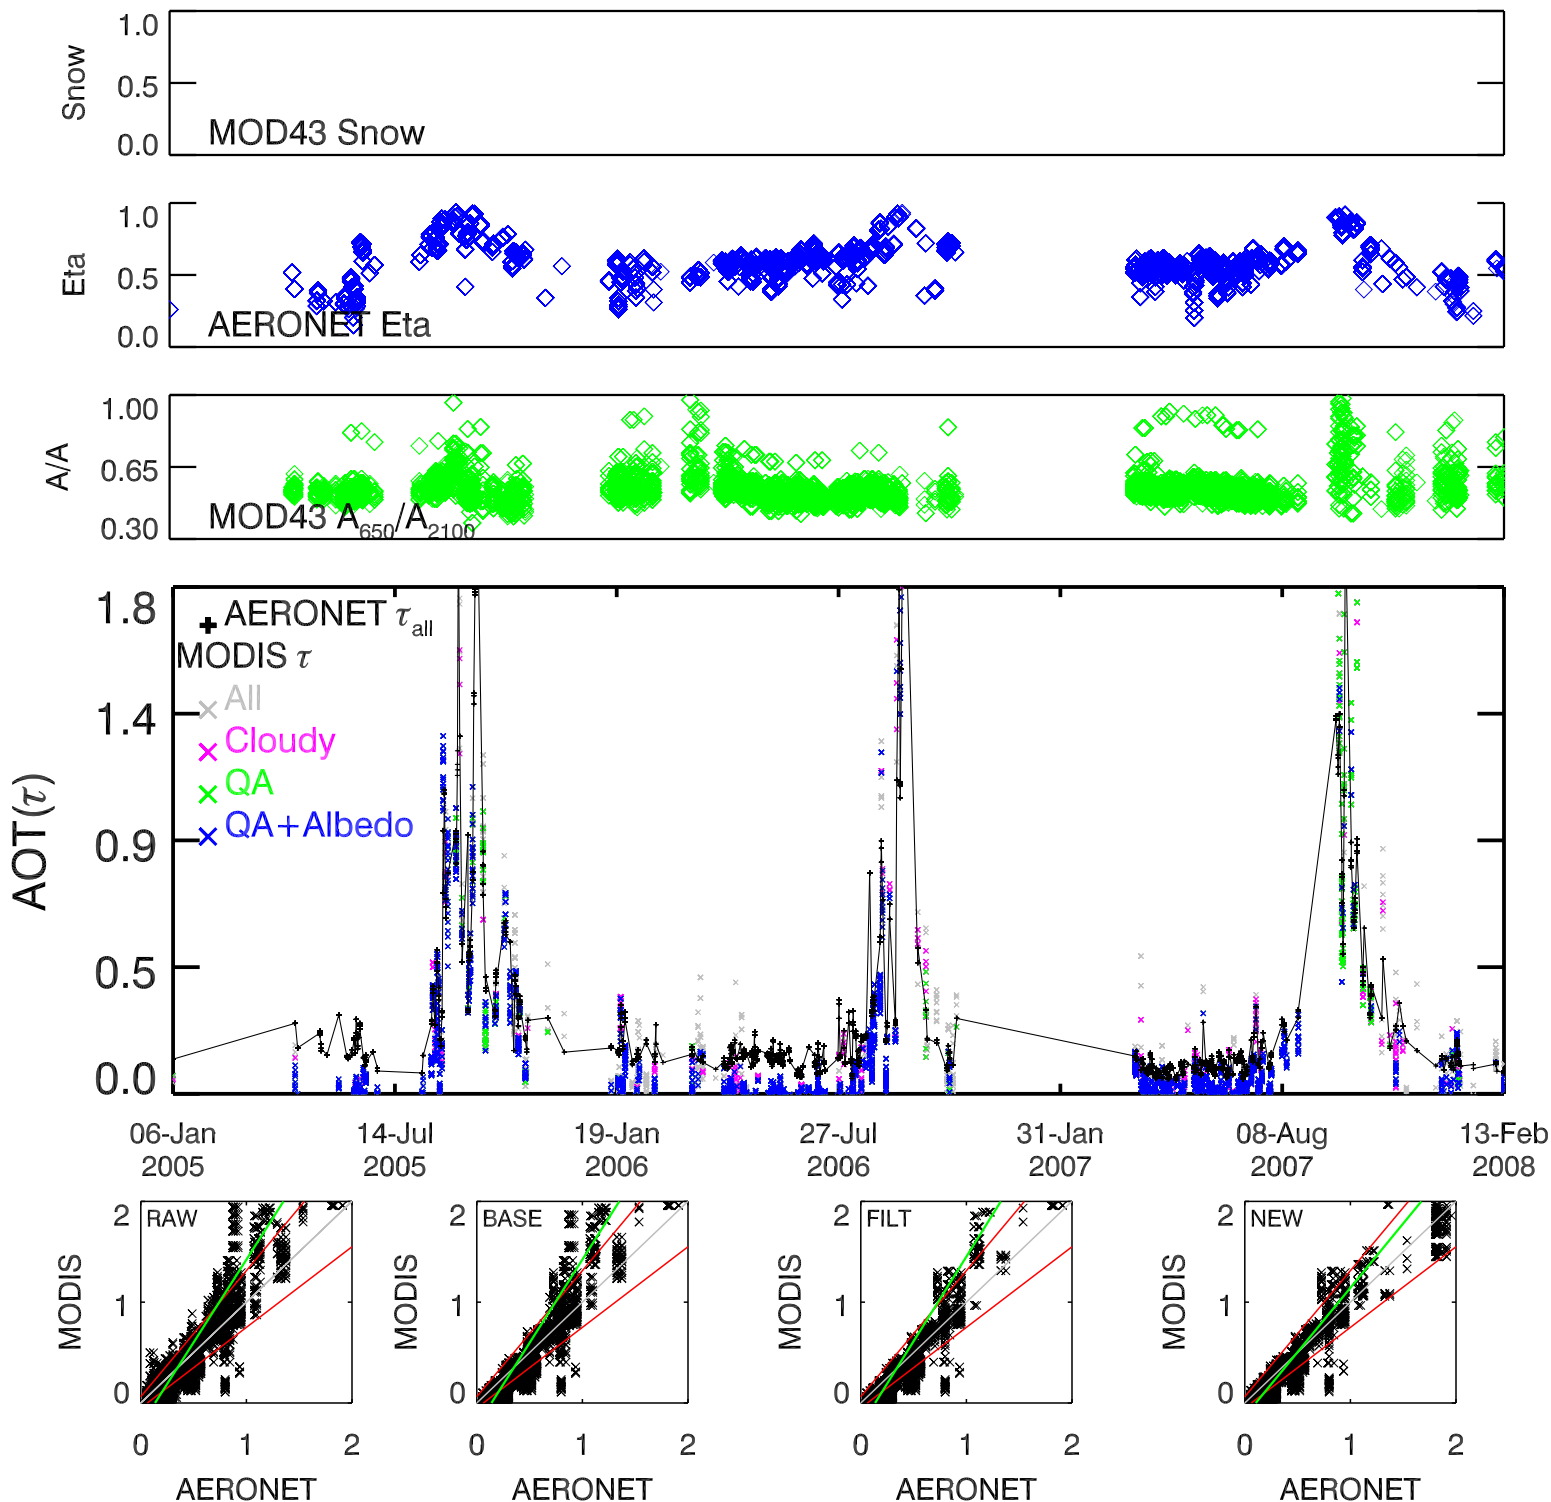

| Which |            | MODIS AOD  |             |             | MODIS-AERONET |       | % -/in/+    |       |       | Regression |                |      |
|-------|------------|------------|-------------|-------------|---------------|-------|-------------|-------|-------|------------|----------------|------|
|       |            | Mean       | >0.2        | >1.0        | Mean Bias     | RMSE  | Tolerance   |       |       | Slope      | r <sup>2</sup> |      |
| RAW   | (N= 14366) | 0.181      | 0.19        | 0.05        | -0.064        | 0.258 | 66/28/      | 4     | 1.011 | 0.76       |                |      |
| BASE  | (N= 11298) | 0.151      | 0.14        | 0.04        | -0.078        | 0.260 | 73/22/      | 3     | 0.981 | 0.76       |                |      |
| FILT  | (N= 11830) | 0.127      | 0.12        | 0.03        | -0.084        | 0.249 | 73/23/      | 2     | 0.977 | 0.75       |                |      |
| NEW   | (N= 11830) | 0.138      | 0.14        | 0.03        | -0.072        | 0.154 | 54/44/      | 1     | 0.985 | 0.79       |                |      |
|       |            | Noise      | vs $\tau_A$ |             | vs $\tau_M$   |       | Est.@       | Est.@ | Est.@ | Est.@      | Est.@          |      |
| Which | Floor      | Diagnostic |             |             | Prognostic    |       | 0.1         | 0.2   | 0.4   | 0.6        | 1.0            |      |
| RAW   | 0.121      | -0.00      | +           | 0.39 $\tau$ | 0.05          | +     | 0.11 $\tau$ | 0.12  | 0.12  | 0.12       | 0.12           | 0.15 |
| BASE  | 0.125      | 0.04       | +           | 0.33 $\tau$ | 0.06          | +     | 0.08 $\tau$ | 0.12  | 0.12  | 0.12       | 0.12           | 0.14 |
| FILT  | 0.123      | 0.01       | +           | 0.43 $\tau$ | 0.05          | +     | 0.11 $\tau$ | 0.12  | 0.12  | 0.12       | 0.12           | 0.16 |
| NEW   | 0.094      | 0.06       | +           | 0.22 $\tau$ | 0.04          | +     | 0.11 $\tau$ | 0.09  | 0.09  | 0.09       | 0.10           | 0.15 |
