# Supplementary material for: An over-land aerosol optical depth data set for data assimilation by filtering, correction, and aggregation of MODIS Collection 5 optical depth retrievals
Source: Copernicus journal article supplement (doi:10.5194/amt-4-379-2011), 2011-03-01
Supplement: Supplementary file 4 [file ps000_ocean_na.pdf › aux_material_lite_rev/l3_region_pages/aqua/ps000_ocean_na.pdf]

A 21.50S 15.50W ocean\_NA  
AERONET AOD: N= 1015  $\overline{\tau}$ =0.02 eta=0.57

MODIS  $\tau$

- x RAW
- x BASE
- x NEW
- x STRONG

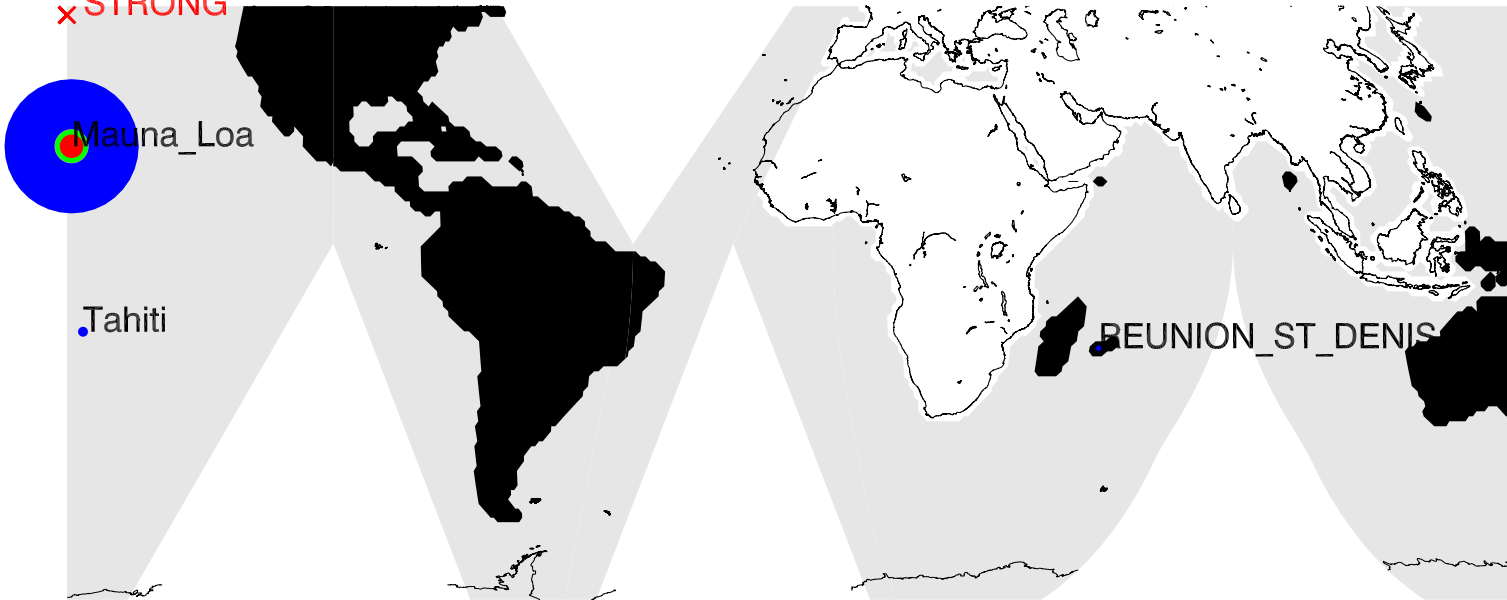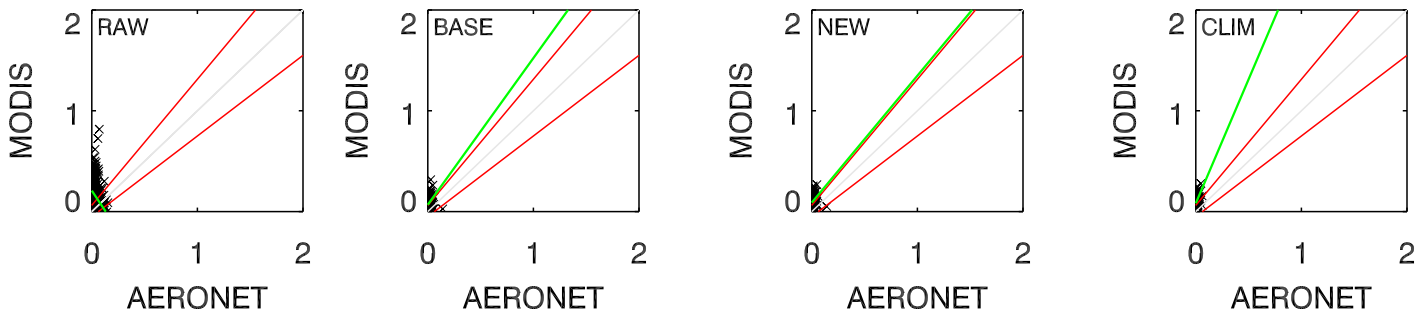

| Which | MODIS AOD |       |      |      | MODIS-AERONET |       | % -/in/+<br>Tolerance | Regression |                |
|-------|-----------|-------|------|------|---------------|-------|-----------------------|------------|----------------|
|       | (N=       | Mean  | >0.2 | >1.0 | Mean Bias     | RMSE  |                       | Slope      | r <sup>2</sup> |
| RAW   | (N= 731)  | 0.172 | 0.34 | 0.00 | 0.149         | 0.185 | 1/15/82               | 9.037      | 0.07           |
| BASE  | (N= 165)  | 0.090 | 0.04 | 0.00 | 0.075         | 0.092 | 0/33/66               | 8.460      | 0.20           |
| NEW   | (N= 161)  | 0.108 | 0.04 | 0.00 | 0.093         | 0.105 | 0/17/81               | 8.261      | 0.12           |
| CLIM  | (N= 130)  | 0.117 | 0.04 | 0.00 | 0.103         | 0.112 | 0/13/86               | 7.633      | 0.34           |

AERONET AOD > 0.2

| Which | Noise | vs $\tau_A$ |                | vs $\tau_M$ |                | Est.@ | Est.@ | Est.@ | Est.@ | Est.@ |
|-------|-------|-------------|----------------|-------------|----------------|-------|-------|-------|-------|-------|
|       | Floor | Diagnostic  |                | Prognostic  |                | 0.1   | 0.2   | 0.4   | 0.6   | 1.0   |
| RAW   | 0.185 | *****       | + ***** $\tau$ | 0.00        | + 0.93 $\tau$  | 0.18  | 0.19  | 0.37  | 0.56  | 0.93  |
| BASE  | 0.092 | *****       | + ***** $\tau$ | *****       | + ***** $\tau$ | 0.09  | 0.09  | 0.09  | 0.09  | 0.09  |
| NEW   | 0.105 | *****       | + ***** $\tau$ | *****       | + ***** $\tau$ | 0.11  | 0.11  | 0.11  | 0.11  | 0.11  |
| CLIM  | 0.112 | *****       | + ***** $\tau$ | *****       | + ***** $\tau$ | 0.11  | 0.11  | 0.11  | 0.11  | 0.11  |
