# Supplementary material for: An over-land aerosol optical depth data set for data assimilation by filtering, correction, and aggregation of MODIS Collection 5 optical depth retrievals
Source: Copernicus journal article supplement (doi:10.5194/amt-4-379-2011), 2011-03-01
Supplement: Supplementary file 5 [file ps001_n._american_boreal.pdf › aux_material_lite_rev/l3_region_pages/aqua/ps001_n._american_boreal.pdf]

A

66.50N 90.50W N. American Bo

AERONET AOD: N= 2853  $\overline{\tau}$ =0.09 eta=0.63

MODIS  $\tau$

- RAW
- BASE
- NEW
- STRONG

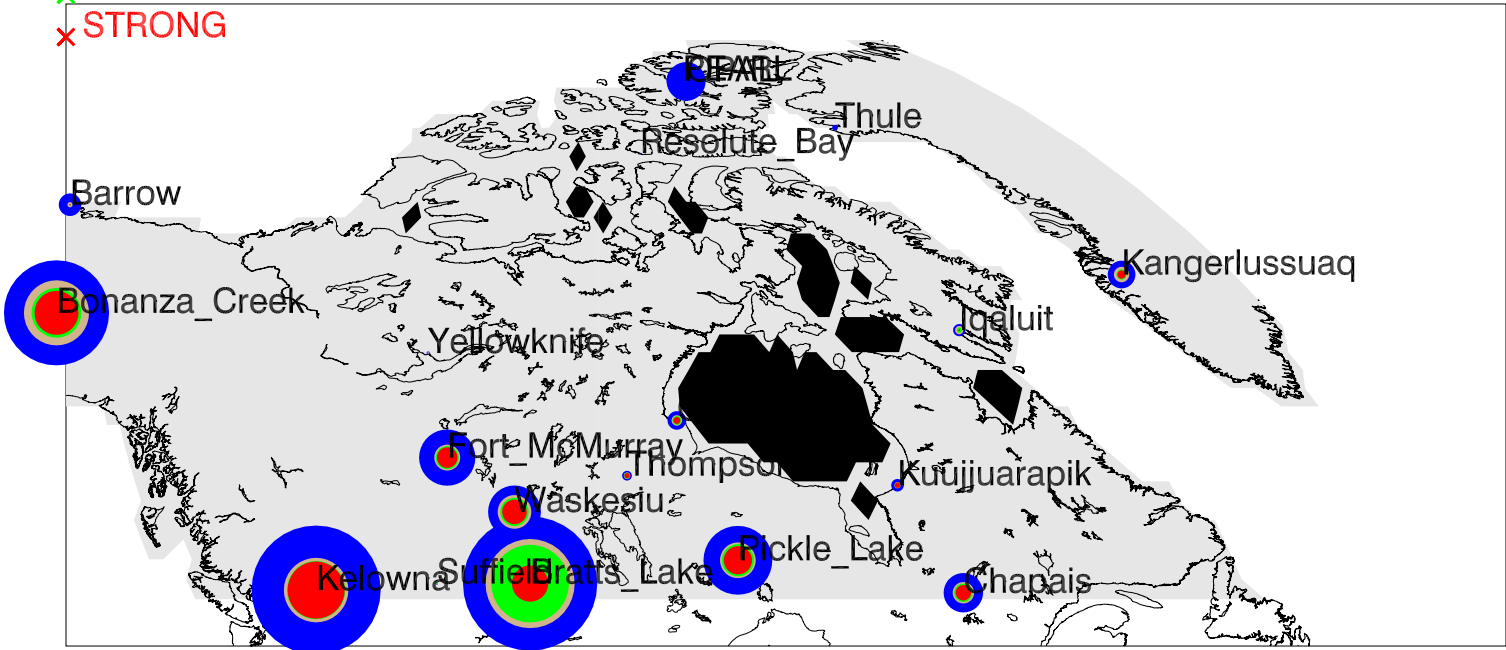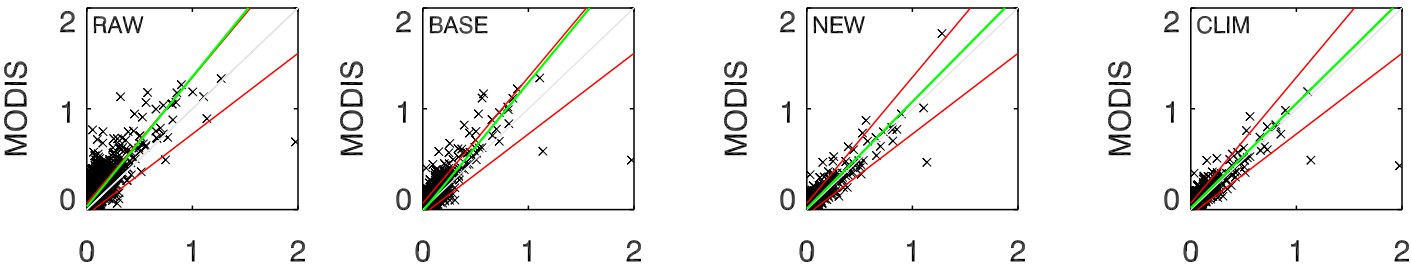

| AERONET           |           |           | AERONET       |      |           | AERONET  |           |            | AERONET        |  |
|-------------------|-----------|-----------|---------------|------|-----------|----------|-----------|------------|----------------|--|
| Which             |           | MODIS AOD | MODIS-AERONET |      |           | % -/in/+ |           | Regression |                |  |
|                   |           | Mean      | >0.2          | >1.0 | Mean Bias | RMSE     | Tolerance | Slope      | r <sup>2</sup> |  |
| RAW               | (N= 2706) | 0.149     | 0.23          | 0.01 | 0.057     | 0.127    | 1/59/38   | 1.107      | 0.47           |  |
| BASE              | (N= 1370) | 0.108     | 0.12          | 0.01 | 0.011     | 0.086    | 2/84/13   | 1.093      | 0.52           |  |
| NEW               | (N= 1141) | 0.112     | 0.09          | 0.00 | 0.016     | 0.057    | 1/84/13   | 0.989      | 0.70           |  |
| CLIM              | (N= 1194) | 0.120     | 0.10          | 0.00 | 0.021     | 0.079    | 0/84/14   | 0.864      | 0.51           |  |
| AERONET AOD > 0.2 |           |           |               |      |           |          |           |            |                |  |
| RAW               | (N= 191)  | 0.492     | 0.92          | 0.08 | 0.104     | 0.302    | 5/51/43   | 0.958      | 0.36           |  |
| BASE              | (N= 100)  | 0.471     | 0.87          | 0.07 | 0.077     | 0.248    | 8/58/33   | 1.042      | 0.41           |  |
| NEW               | (N= 88)   | 0.384     | 0.82          | 0.02 | 0.001     | 0.127    | 9/79/11   | 0.964      | 0.68           |  |
| CLIM              | (N= 90)   | 0.396     | 0.83          | 0.02 | -0.004    | 0.232    | 7/80/12   | 0.829      | 0.42           |  |

| Which | Noise | vs $\tau_A$ |                | vs $\tau_M$ |               | Est.@ | Est.@ | Est.@ | Est.@ | Est.@ |
|-------|-------|-------------|----------------|-------------|---------------|-------|-------|-------|-------|-------|
|       | Floor | Diagnostic  |                | Prognostic  |               | 0.1   | 0.2   | 0.4   | 0.6   | 1.0   |
| RAW   | 0.102 | 0.03        | + 0.35 $\tau$  | 0.07        | + 0.29 $\tau$ | 0.10  | 0.13  | 0.19  | 0.25  | 0.37  |
| BASE  | 0.056 | 0.01        | + 0.34 $\tau$  | 0.03        | + 0.28 $\tau$ | 0.06  | 0.08  | 0.14  | 0.20  | 0.31  |
| NEW   | 0.046 | *****       | + ***** $\tau$ | 0.03        | + 0.15 $\tau$ | 0.05  | 0.06  | 0.09  | 0.12  | 0.18  |
| CLIM  | 0.049 | *****       | + ***** $\tau$ | 0.06        | + 0.11 $\tau$ | 0.07  | 0.08  | 0.10  | 0.12  | 0.16  |
