# Supplementary material for: An over-land aerosol optical depth data set for data assimilation by filtering, correction, and aggregation of MODIS Collection 5 optical depth retrievals
Source: Copernicus journal article supplement (doi:10.5194/amt-4-379-2011), 2011-03-01
Supplement: Supplementary file 6 [file ps002_e._conus.pdf › aux_material_lite_rev/l3_region_pages/aqua/ps002_e._conus.pdf]

A

40.50N 84.50W E. CONUS

AERONET AOD: N= 9412  $\overline{\tau}$ =0.16 eta=0.64

MODIS  $\tau$

- RAW
- BASE
- NEW
- STRONG

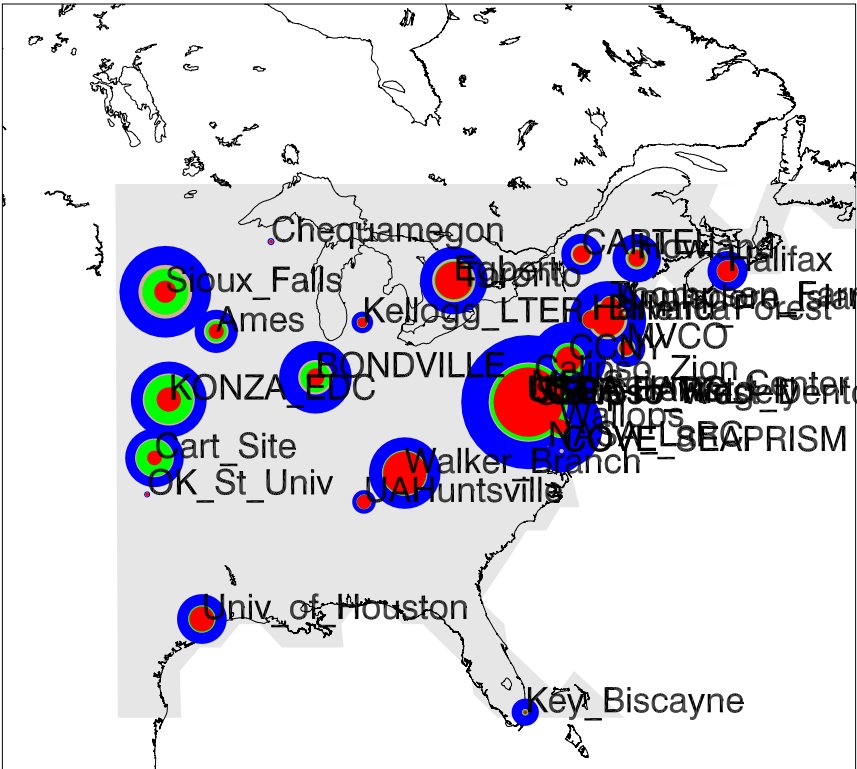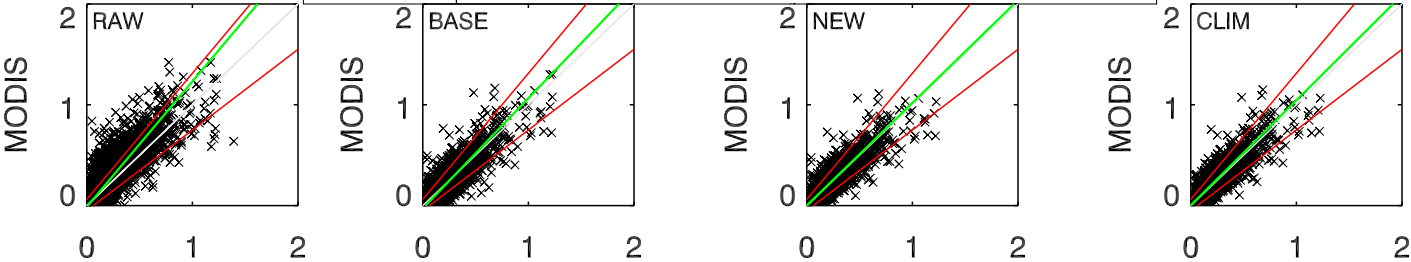

| AERONET           |           |             | AERONET       |             |             | AERONET  |           |       | AERONET    |                |
|-------------------|-----------|-------------|---------------|-------------|-------------|----------|-----------|-------|------------|----------------|
| Which             |           | MODIS AOD   | MODIS-AERONET |             |             | % -/in/+ |           |       | Regression |                |
|                   |           | Mean        | >0.2          | >1.0        | Mean Bias   | RMSE     | Tolerance |       | Slope      | r <sup>2</sup> |
| RAW               | (N= 8797) | 0.193       | 0.36          | 0.00        | 0.027       | 0.103    | 8/69/22   |       | 1.167      | 0.59           |
| BASE              | (N= 4594) | 0.145       | 0.24          | 0.00        | -0.013      | 0.074    | 10/82/ 6  |       | 1.011      | 0.65           |
| NEW               | (N= 4206) | 0.164       | 0.27          | 0.00        | 0.004       | 0.067    | 4/87/ 7   |       | 0.995      | 0.67           |
| CLIM              | (N= 4045) | 0.173       | 0.29          | 0.00        | 0.010       | 0.068    | 3/86/ 9   |       | 1.027      | 0.69           |
| AERONET AOD > 0.2 |           |             |               |             |             |          |           |       |            |                |
| RAW               | (N= 2267) | 0.425       | 0.91          | 0.02        | 0.055       | 0.146    | 6/64/29   |       | 1.119      | 0.55           |
| BASE              | (N= 1097) | 0.358       | 0.82          | 0.01        | -0.008      | 0.115    | 13/75/10  |       | 0.995      | 0.64           |
| NEW               | (N= 1032) | 0.365       | 0.88          | 0.01        | -0.002      | 0.105    | 9/80/ 9   |       | 0.976      | 0.64           |
| CLIM              | (N= 1019) | 0.375       | 0.89          | 0.01        | 0.009       | 0.107    | 8/78/12   |       | 1.006      | 0.65           |
|                   |           |             |               |             |             |          |           |       |            |                |
|                   | Noise     | vs $\tau_A$ |               | vs $\tau_M$ |             | Est.@    | Est.@     | Est.@ | Est.@      | Est.@          |
| Which             | Floor     | Diagnostic  |               | Prognostic  |             | 0.1      | 0.2       | 0.4   | 0.6        | 1.0            |
| RAW               | 0.084     | 0.06 +      | 0.12 $\tau$   | 0.02 +      | 0.25 $\tau$ | 0.08     | 0.08      | 0.12  | 0.17       | 0.27           |
| BASE              | 0.056     | 0.04 +      | 0.14 $\tau$   | 0.02 +      | 0.17 $\tau$ | 0.06     | 0.06      | 0.09  | 0.12       | 0.19           |
| NEW               | 0.048     | 0.01 +      | 0.19 $\tau$   | 0.02 +      | 0.18 $\tau$ | 0.05     | 0.05      | 0.09  | 0.12       | 0.19           |
| CLIM              | 0.048     | 0.03 +      | 0.15 $\tau$   | 0.02 +      | 0.17 $\tau$ | 0.05     | 0.05      | 0.09  | 0.12       | 0.19           |
