# Supplementary material for: An over-land aerosol optical depth data set for data assimilation by filtering, correction, and aggregation of MODIS Collection 5 optical depth retrievals
Source: Copernicus journal article supplement (doi:10.5194/amt-4-379-2011), 2011-03-01
Supplement: Supplementary file 7 [file ps003_w._conus.pdf › aux_material_lite_rev/l3_region_pages/aqua/ps003_w._conus.pdf]

# A 38.50N 110.50W W. CONUS

## AERONET AOD: N= 8394 $\bar{\tau}$ =0.09 eta=0.57

MODIS  $\tau$

x RAW  
x BASE  
x NEW  
x STRONG

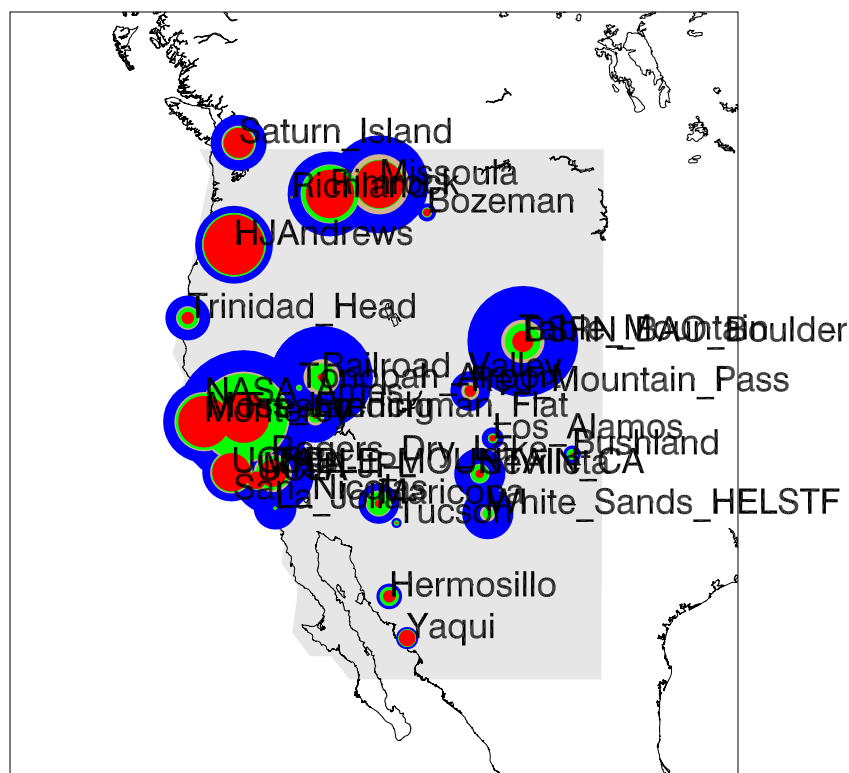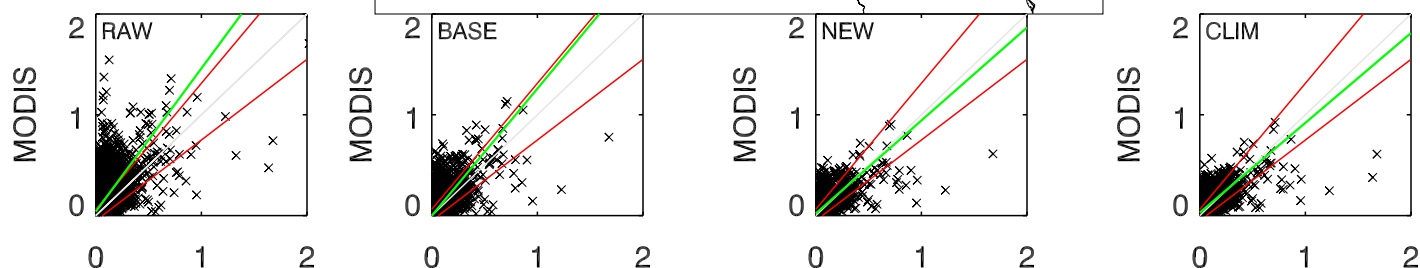

| Which             | AERONET   |           |               | AERONET |        |          | AERONET    |       |           | AERONET |                |
|-------------------|-----------|-----------|---------------|---------|--------|----------|------------|-------|-----------|---------|----------------|
|                   |           | MODIS AOD | MODIS-AERONET |         |        | % -/in/+ | Regression |       |           |         |                |
|                   |           |           | Mean          | >0.2    | >1.0   |          | Mean Bias  | RMSE  | Tolerance | Slope   | r <sup>2</sup> |
| RAW               | (N= 8568) | 0.170     | 0.32          | 0.00    | 0.079  | 0.159    | 4/51/44    | 1.472 | 0.11      |         |                |
| BASE              | (N= 4695) | 0.116     | 0.16          | 0.00    | 0.024  | 0.104    | 6/69/23    | 1.238 | 0.20      |         |                |
| NEW               | (N= 4266) | 0.109     | 0.09          | 0.00    | 0.014  | 0.077    | 4/79/16    | 0.895 | 0.25      |         |                |
| CLIM              | (N= 4400) | 0.115     | 0.10          | 0.00    | 0.020  | 0.079    | 3/78/18    | 0.869 | 0.25      |         |                |
| AERONET AOD > 0.2 |           |           |               |         |        |          |            |       |           |         |                |
| RAW               | (N= 602)  | 0.338     | 0.73          | 0.02    | 0.022  | 0.206    | 19/53/27   | 0.998 | 0.20      |         |                |
| BASE              | (N= 352)  | 0.276     | 0.58          | 0.01    | -0.030 | 0.181    | 34/47/18   | 0.993 | 0.25      |         |                |
| NEW               | (N= 332)  | 0.238     | 0.50          | 0.00    | -0.074 | 0.168    | 31/61/ 7   | 0.770 | 0.25      |         |                |
| CLIM              | (N= 355)  | 0.243     | 0.53          | 0.00    | -0.069 | 0.175    | 30/61/ 7   | 0.745 | 0.22      |         |                |

| Which | Noise | vs $\tau_A$ |             | vs $\tau_M$ |             | Est.@ | Est.@ | Est.@ | Est.@ | Est.@ |
|-------|-------|-------------|-------------|-------------|-------------|-------|-------|-------|-------|-------|
|       | Floor | Diagnostic  |             | Prognostic  |             | 0.1   | 0.2   | 0.4   | 0.6   | 1.0   |
| RAW   | 0.155 | 0.03 +      | 0.34 $\tau$ | -0.03 +     | 0.74 $\tau$ | 0.15  | 0.15  | 0.27  | 0.41  | 0.71  |
| BASE  | 0.095 | 0.00 +      | 0.40 $\tau$ | 0.03 +      | 0.47 $\tau$ | 0.10  | 0.12  | 0.22  | 0.31  | 0.50  |
| NEW   | 0.063 | -0.04 +     | 0.49 $\tau$ | -0.01 +     | 0.51 $\tau$ | 0.06  | 0.09  | 0.19  | 0.30  | 0.50  |
| CLIM  | 0.065 | -0.10 +     | 0.69 $\tau$ | 0.01 +      | 0.44 $\tau$ | 0.06  | 0.10  | 0.18  | 0.27  | 0.45  |
