# Supplementary material for: An over-land aerosol optical depth data set for data assimilation by filtering, correction, and aggregation of MODIS Collection 5 optical depth retrievals
Source: Copernicus journal article supplement (doi:10.5194/amt-4-379-2011), 2011-03-01
Supplement: Supplementary file 8 [file ps004_central_america.pdf › aux_material_lite_rev/l3_region_pages/aqua/ps004_central_america.pdf]

A

18.50N 87.50W Central America

AERONET AOD: N= 1079  $\overline{\tau}$ =0.31 eta=0.59

MODIS  $\tau$

- RAW
- BASE
- NEW
- STRONG

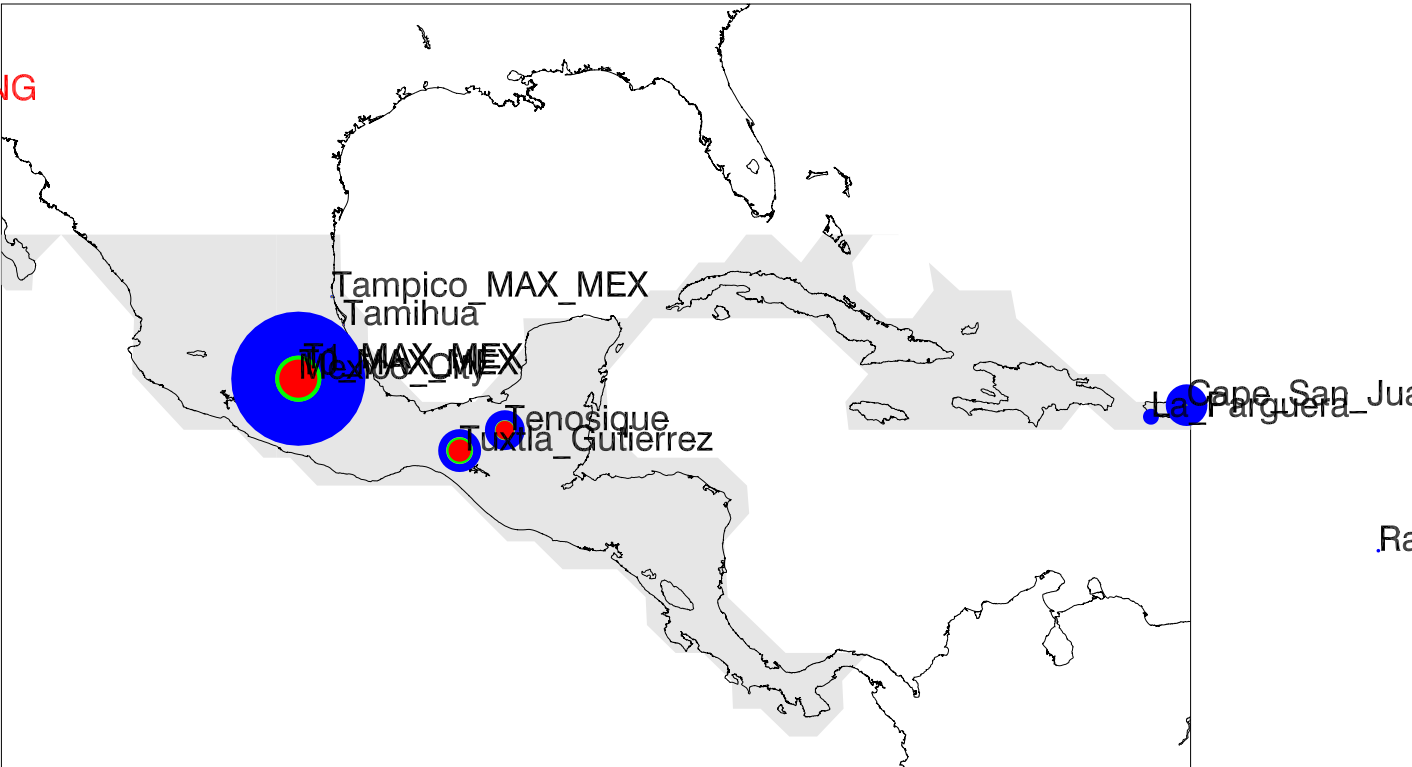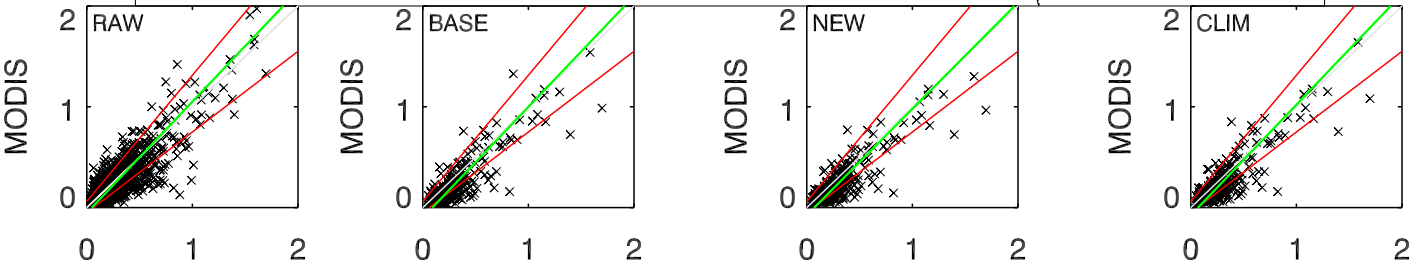

| AERONET           |          |             | AERONET       |             |             | AERONET  |           |       | AERONET    |                |
|-------------------|----------|-------------|---------------|-------------|-------------|----------|-----------|-------|------------|----------------|
| Which             |          | MODIS AOD   | MODIS-AERONET |             |             | % -/in/+ |           |       | Regression |                |
|                   |          | Mean        | >0.2          | >1.0        | Mean Bias   | RMSE     | Tolerance |       | Slope      | r <sup>2</sup> |
| RAW               | (N= 997) | 0.280       | 0.53          | 0.02        | -0.021      | 0.145    | 19/67/13  |       | 0.908      | 0.58           |
| BASE              | (N= 349) | 0.227       | 0.32          | 0.02        | -0.071      | 0.151    | 33/62/ 3  |       | 0.857      | 0.70           |
| NEW               | (N= 344) | 0.238       | 0.35          | 0.02        | -0.059      | 0.146    | 25/71/ 3  |       | 0.835      | 0.75           |
| CLIM              | (N= 343) | 0.250       | 0.36          | 0.02        | -0.047      | 0.142    | 22/71/ 5  |       | 0.874      | 0.72           |
| AERONET AOD > 0.2 |          |             |               |             |             |          |           |       |            |                |
| RAW               | (N= 577) | 0.388       | 0.77          | 0.04        | -0.048      | 0.179    | 26/62/10  |       | 0.892      | 0.57           |
| BASE              | (N= 199) | 0.326       | 0.52          | 0.04        | -0.093      | 0.190    | 37/59/ 3  |       | 0.853      | 0.70           |
| NEW               | (N= 196) | 0.330       | 0.58          | 0.04        | -0.087      | 0.186    | 35/60/ 4  |       | 0.830      | 0.75           |
| CLIM              | (N= 195) | 0.345       | 0.59          | 0.04        | -0.073      | 0.182    | 33/61/ 5  |       | 0.869      | 0.72           |
|                   |          |             |               |             |             |          |           |       |            |                |
|                   | Noise    | vs $\tau_A$ |               | vs $\tau_M$ |             | Est.@    | Est.@     | Est.@ | Est.@      | Est.@          |
| Which             | Floor    | Diagnostic  |               | Prognostic  |             | 0.1      | 0.2       | 0.4   | 0.6        | 1.0            |
| RAW               | 0.080    | 0.03 +      | 0.22 $\tau$   | 0.08 +      | 0.10 $\tau$ | 0.09     | 0.10      | 0.12  | 0.14       | 0.18           |
| BASE              | 0.072    | 0.06 +      | 0.17 $\tau$   | 0.03 +      | 0.18 $\tau$ | 0.07     | 0.07      | 0.11  | 0.14       | 0.21           |
| NEW               | 0.058    | 0.03 +      | 0.24 $\tau$   | 0.03 +      | 0.18 $\tau$ | 0.06     | 0.07      | 0.10  | 0.14       | 0.21           |
| CLIM              | 0.056    | 0.06 +      | 0.13 $\tau$   | 0.03 +      | 0.17 $\tau$ | 0.06     | 0.07      | 0.10  | 0.14       | 0.21           |
