# Supplementary material for: An over-land aerosol optical depth data set for data assimilation by filtering, correction, and aggregation of MODIS Collection 5 optical depth retrievals
Source: Copernicus journal article supplement (doi:10.5194/amt-4-379-2011), 2011-03-01
Supplement: Supplementary file 9 [file ps005_south_america.pdf › aux_material_lite_rev/l3_region_pages/aqua/ps005_south_america.pdf]

# A 6.50S 60.50W South America

AERONET AOD: N= 2172  $\overline{\tau}$ =0.29 eta=0.59

MODIS  $\tau$

- RAW
- BASE
- NEW
- STRONG

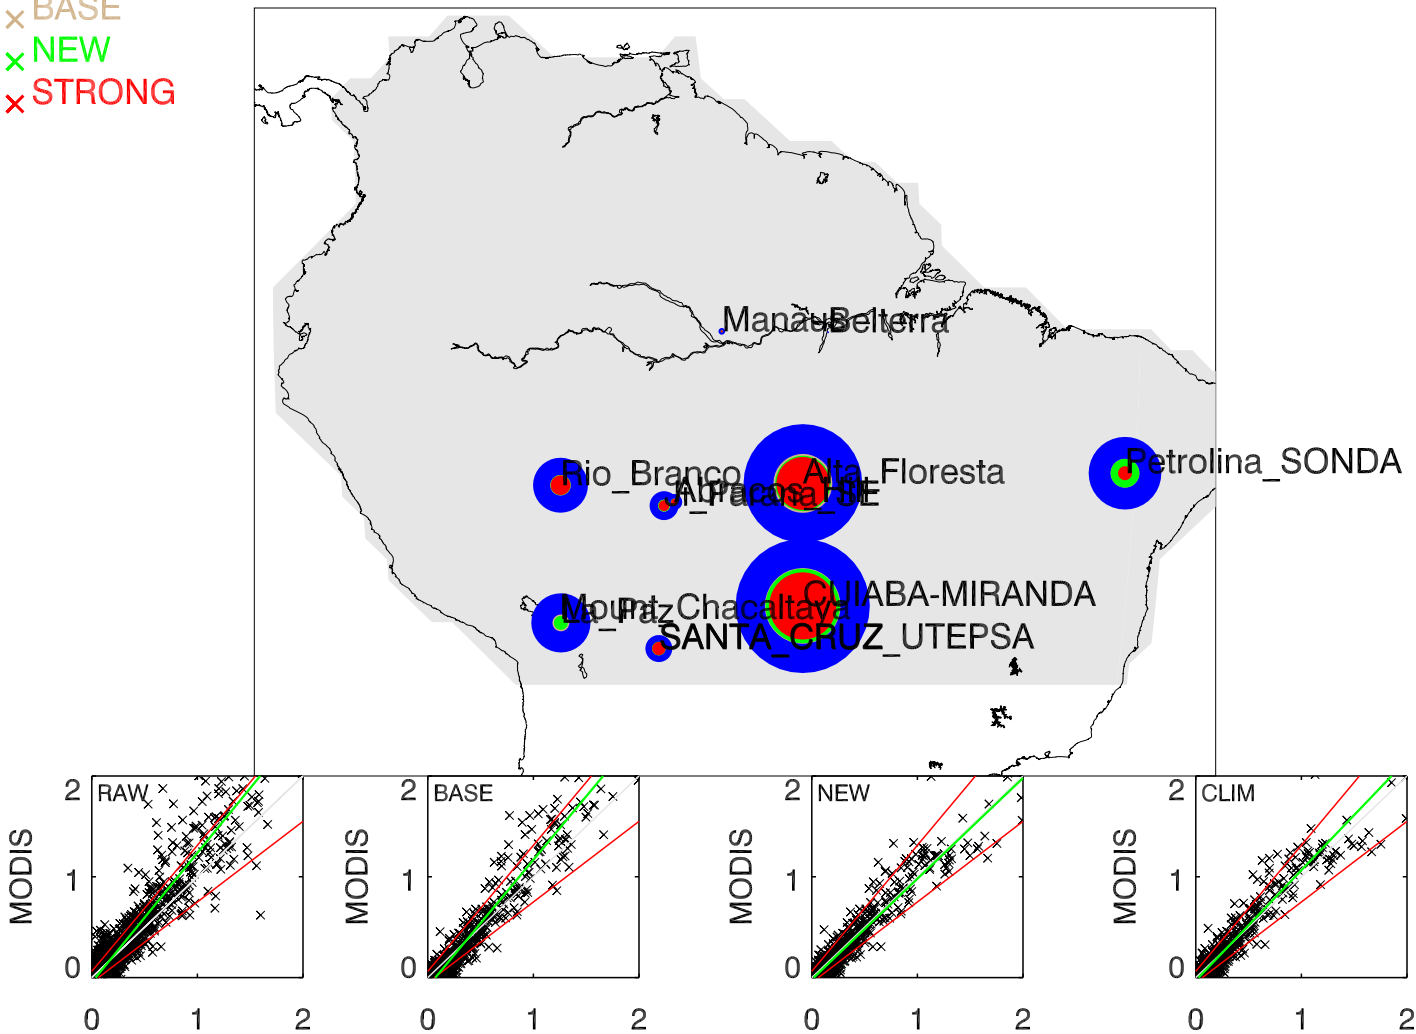

| AERONET           |           |             | AERONET       |        |             | AERONET  |           |       | AERONET    |                |       |
|-------------------|-----------|-------------|---------------|--------|-------------|----------|-----------|-------|------------|----------------|-------|
| Which             |           | MODIS AOD   | MODIS-AERONET |        |             | % -/in/+ |           |       | Regression |                |       |
|                   |           | Mean        | >0.2          | >1.0   | Mean Bias   | RMSE     | Tolerance |       | Slope      | r <sup>2</sup> |       |
| RAW               | (N= 2317) | 0.280       | 0.32          | 0.07   | 0.025       | 0.189    | 19/62/18  |       | 1.079      | 0.76           |       |
| BASE              | (N= 1041) | 0.285       | 0.29          | 0.09   | -0.013      | 0.187    | 27/65/ 6  |       | 1.041      | 0.83           |       |
| NEW               | (N= 1004) | 0.262       | 0.31          | 0.07   | -0.019      | 0.124    | 13/81/ 5  |       | 0.985      | 0.83           |       |
| CLIM              | (N= 963)  | 0.248       | 0.28          | 0.07   | -0.005      | 0.110    | 10/82/ 6  |       | 1.034      | 0.85           |       |
| AERONET AOD > 0.2 |           |             |               |        |             |          |           |       |            |                |       |
| RAW               | (N= 662)  | 0.757       | 0.88          | 0.24   | 0.107       | 0.331    | 11/61/26  |       | 1.065      | 0.73           |       |
| BASE              | (N= 359)  | 0.726       | 0.80          | 0.25   | 0.057       | 0.302    | 15/67/17  |       | 1.040      | 0.82           |       |
| NEW               | (N= 338)  | 0.623       | 0.85          | 0.22   | -0.010      | 0.199    | 13/75/10  |       | 0.983      | 0.82           |       |
| CLIM              | (N= 297)  | 0.610       | 0.84          | 0.22   | 0.022       | 0.182    | 12/72/14  |       | 1.031      | 0.84           |       |
|                   | Noise     | vs $\tau_A$ |               |        | vs $\tau_M$ |          | Est.@     | Est.@ | Est.@      | Est.@          | Est.@ |
| Which             | Floor     | Diagnostic  |               |        | Prognostic  |          | 0.1       | 0.2   | 0.4        | 0.6            | 1.0   |
| RAW               | 0.081     | -0.01 +     | 0.32 $\tau$   | 0.04 + | 0.16 $\tau$ | 0.08     | 0.08      | 0.10  | 0.14       | 0.20           |       |
| BASE              | 0.072     | 0.03 +      | 0.20 $\tau$   | 0.03 + | 0.13 $\tau$ | 0.07     | 0.07      | 0.08  | 0.10       | 0.15           |       |
| NEW               | 0.055     | 0.05 +      | 0.09 $\tau$   | 0.01 + | 0.16 $\tau$ | 0.06     | 0.06      | 0.08  | 0.11       | 0.17           |       |
| CLIM              | 0.052     | 0.05 +      | 0.12 $\tau$   | 0.02 + | 0.14 $\tau$ | 0.05     | 0.05      | 0.08  | 0.11       | 0.16           |       |
