# Supplementary material for: An over-land aerosol optical depth data set for data assimilation by filtering, correction, and aggregation of MODIS Collection 5 optical depth retrievals
Source: Copernicus journal article supplement (doi:10.5194/amt-4-379-2011), 2011-03-01
Supplement: Supplementary file 10 [file ps006_s._south_america.pdf › aux_material_lite_rev/l3_region_pages/aqua/ps006_s._south_america.pdf]

# A 32.50S 64.50W S. South America

AERONET AOD: N= 2766  $\overline{\tau}$ =0.10 eta=0.52

MODIS  $\tau$

- RAW
- BASE
- NEW
- STRONG

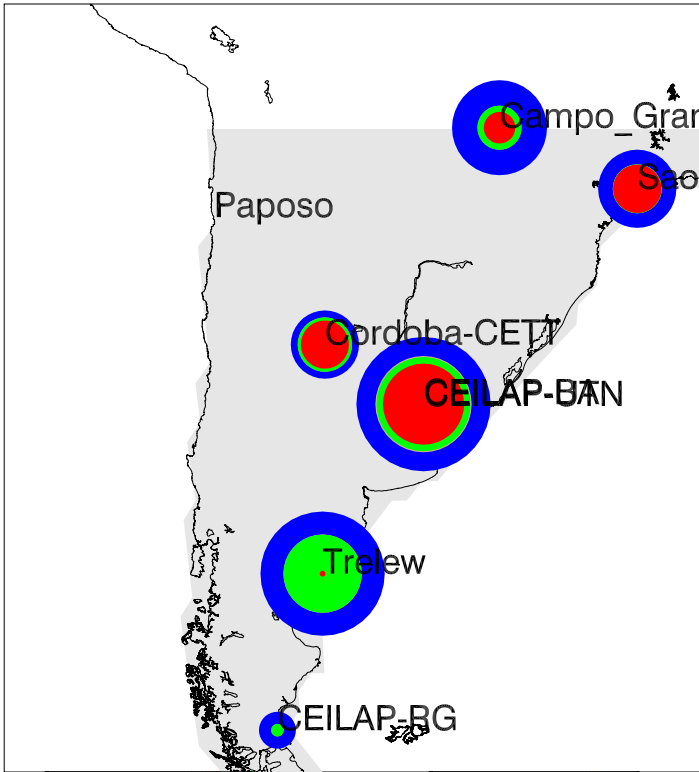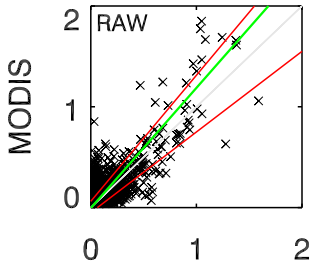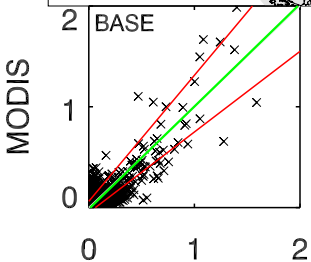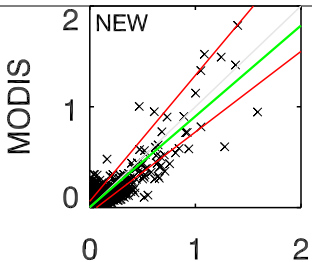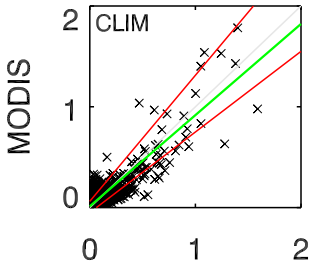

| Which             |           | MODIS AOD |      |      | MODIS-AERONET |       |                    | Regression |                |
|-------------------|-----------|-----------|------|------|---------------|-------|--------------------|------------|----------------|
|                   |           | Mean      | >0.2 | >1.0 | Mean Bias     | RMSE  | % -/in/+ Tolerance | Slope      | r <sup>2</sup> |
| RAW               | (N= 2612) | 0.125     | 0.17 | 0.01 | 0.016         | 0.114 | 13/62/24           | 1.014      | 0.50           |
| BASE              | (N= 1629) | 0.099     | 0.10 | 0.01 | -0.013        | 0.097 | 17/66/16           | 0.874      | 0.60           |
| NEW               | (N= 1620) | 0.106     | 0.08 | 0.00 | -0.006        | 0.082 | 10/75/13           | 0.817      | 0.60           |
| CLIM              | (N= 1602) | 0.115     | 0.09 | 0.00 | 0.002         | 0.083 | 9/74/16            | 0.817      | 0.61           |
| AERONET AOD > 0.2 |           |           |      |      |               |       |                    |            |                |
| RAW               | (N= 315)  | 0.348     | 0.58 | 0.06 | -0.046        | 0.197 | 35/54/10           | 0.935      | 0.59           |
| BASE              | (N= 205)  | 0.284     | 0.41 | 0.04 | -0.103        | 0.189 | 54/40/ 4           | 0.841      | 0.55           |
| NEW               | (N= 205)  | 0.281     | 0.43 | 0.03 | -0.106        | 0.173 | 51/45/ 2           | 0.799      | 0.58           |
| CLIM              | (N= 205)  | 0.288     | 0.46 | 0.03 | -0.098        | 0.168 | 49/46/ 3           | 0.795      | 0.60           |

| Which | Noise | vs $\tau_A$ |             | vs $\tau_M$ |             | Est.@ | Est.@ | Est.@ | Est.@ | Est.@ |
|-------|-------|-------------|-------------|-------------|-------------|-------|-------|-------|-------|-------|
|       | Floor | Diagnostic  |             | Prognostic  |             | 0.1   | 0.2   | 0.4   | 0.6   | 1.0   |
| RAW   | 0.098 | 0.04 +      | 0.22 $\tau$ | 0.09 +      | 0.23 $\tau$ | 0.11  | 0.14  | 0.18  | 0.23  | 0.32  |
| BASE  | 0.075 | 0.05 +      | 0.25 $\tau$ | 0.10 +      | 0.16 $\tau$ | 0.12  | 0.14  | 0.17  | 0.20  | 0.27  |
| NEW   | 0.059 | 0.05 +      | 0.22 $\tau$ | 0.05 +      | 0.27 $\tau$ | 0.07  | 0.10  | 0.16  | 0.21  | 0.32  |
| CLIM  | 0.061 | 0.04 +      | 0.23 $\tau$ | 0.06 +      | 0.22 $\tau$ | 0.08  | 0.10  | 0.15  | 0.19  | 0.28  |
