# Supplementary material for: An over-land aerosol optical depth data set for data assimilation by filtering, correction, and aggregation of MODIS Collection 5 optical depth retrievals
Source: Copernicus journal article supplement (doi:10.5194/amt-4-379-2011), 2011-03-01
Supplement: Supplementary file 11 [file ps007_africa_below_equator.pdf › aux_material_lite_rev/l3_region_pages/aqua/ps007_africa_below_equator.pdf]

# A 17.50S 26.50E Africa below equ

AERONET AOD: N= 1331  $\overline{\tau}$ =0.16 eta=0.64

MODIS  $\tau$

- x RAW
- x BASE
- x NEW
- x STRONG

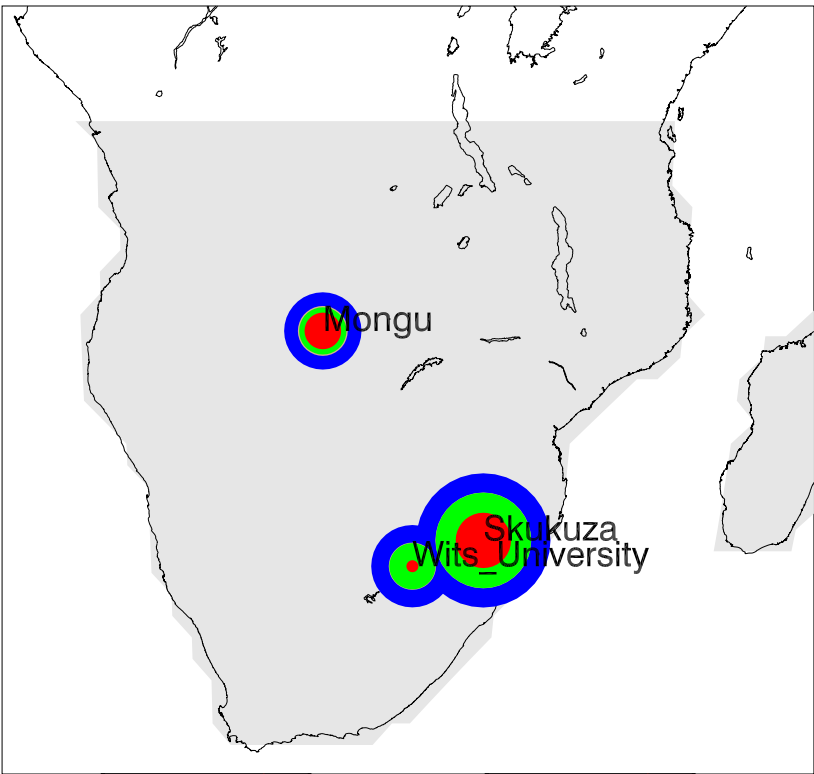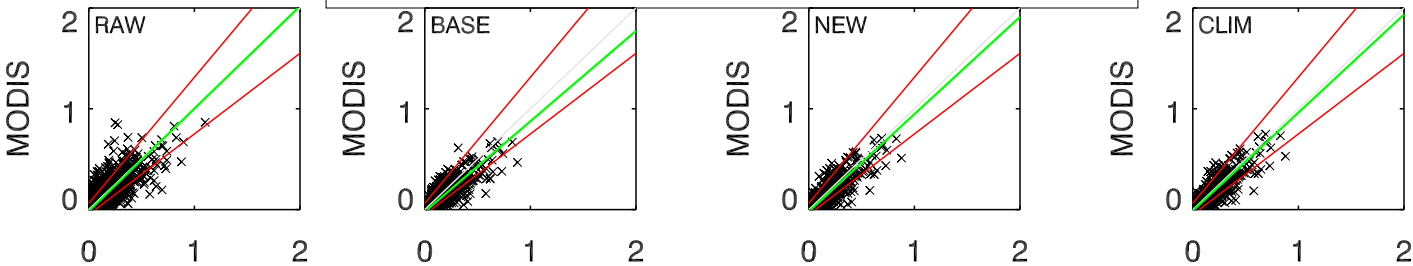

| AERONET           |           |           | AERONET       |      |           | AERONET  |           |            | AERONET        |  |
|-------------------|-----------|-----------|---------------|------|-----------|----------|-----------|------------|----------------|--|
| Which             |           | MODIS AOD | MODIS-AERONET |      |           | % -/in/+ |           | Regression |                |  |
|                   |           | Mean      | >0.2          | >1.0 | Mean Bias | RMSE     | Tolerance | Slope      | r <sup>2</sup> |  |
| RAW               | (N= 1349) | 0.157     | 0.27          | 0.00 | -0.013    | 0.094    | 14/71/13  | 0.958      | 0.33           |  |
| BASE              | (N= 886)  | 0.130     | 0.19          | 0.00 | -0.039    | 0.081    | 17/78/ 3  | 0.856      | 0.46           |  |
| NEW               | (N= 867)  | 0.145     | 0.23          | 0.00 | -0.025    | 0.075    | 13/81/ 5  | 0.931      | 0.53           |  |
| CLIM              | (N= 854)  | 0.155     | 0.25          | 0.00 | -0.016    | 0.071    | 9/84/ 6   | 0.956      | 0.55           |  |
| AERONET AOD > 0.2 |           |           |               |      |           |          |           |            |                |  |
| RAW               | (N= 394)  | 0.275     | 0.63          | 0.00 | -0.048    | 0.133    | 25/65/ 9  | 0.906      | 0.31           |  |
| BASE              | (N= 258)  | 0.239     | 0.53          | 0.00 | -0.077    | 0.122    | 33/64/ 1  | 0.829      | 0.46           |  |
| NEW               | (N= 256)  | 0.264     | 0.64          | 0.00 | -0.051    | 0.109    | 23/73/ 3  | 0.904      | 0.55           |  |
| CLIM              | (N= 257)  | 0.278     | 0.69          | 0.00 | -0.038    | 0.104    | 17/76/ 6  | 0.932      | 0.54           |  |

| Which | Noise | vs $\tau_A$ |             | vs $\tau_M$ |             | Est.@ | Est.@ | Est.@ | Est.@ | Est.@ |
|-------|-------|-------------|-------------|-------------|-------------|-------|-------|-------|-------|-------|
|       | Floor | Diagnostic  |             | Prognostic  |             | 0.1   | 0.2   | 0.4   | 0.6   | 1.0   |
| RAW   | 0.073 | 0.02 +      | 0.24 $\tau$ | -0.02 +     | 0.39 $\tau$ | 0.07  | 0.07  | 0.14  | 0.22  | 0.37  |
| BASE  | 0.056 | 0.01 +      | 0.28 $\tau$ | 0.04 +      | 0.16 $\tau$ | 0.06  | 0.07  | 0.10  | 0.13  | 0.20  |
| NEW   | 0.055 | 0.02 +      | 0.21 $\tau$ | 0.01 +      | 0.21 $\tau$ | 0.05  | 0.05  | 0.09  | 0.13  | 0.21  |
| CLIM  | 0.049 | 0.02 +      | 0.19 $\tau$ | 0.02 +      | 0.15 $\tau$ | 0.05  | 0.05  | 0.08  | 0.11  | 0.17  |
