# Supplementary material for: An over-land aerosol optical depth data set for data assimilation by filtering, correction, and aggregation of MODIS Collection 5 optical depth retrievals
Source: Copernicus journal article supplement (doi:10.5194/amt-4-379-2011), 2011-03-01
Supplement: Supplementary file 12 [file ps008_equatorial_africa.pdf › aux_material_lite_rev/l3_region_pages/aqua/ps008_equatorial_africa.pdf]

# A 0.50N 26.50E Equatorial Africa

AERONET AOD: N= 691  $\overline{\tau}$ =0.19 eta=0.48

MODIS  $\tau$

x RAW  
 x BASE  
 x NEW  
 x STRONG

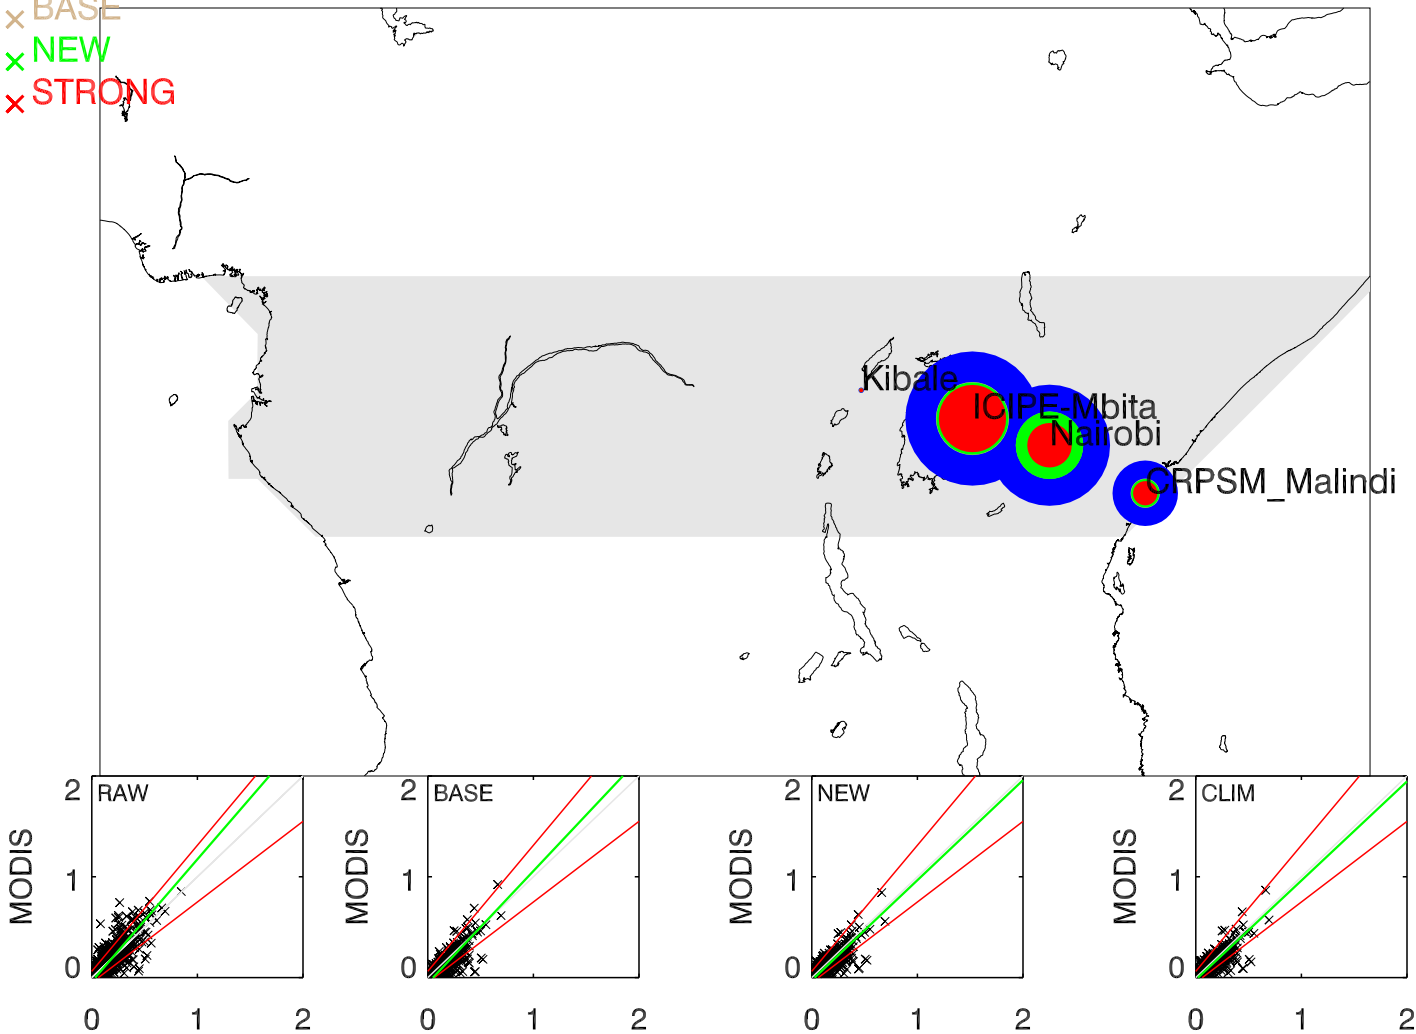

| AERONET           |          |           | AERONET       |      |           | AERONET  |           |            | AERONET        |  |
|-------------------|----------|-----------|---------------|------|-----------|----------|-----------|------------|----------------|--|
| Which             |          | MODIS AOD | MODIS-AERONET |      |           | % -/in/+ |           | Regression |                |  |
|                   |          | Mean      | >0.2          | >1.0 | Mean Bias | RMSE     | Tolerance | Slope      | r <sup>2</sup> |  |
| RAW               | (N= 902) | 0.182     | 0.35          | 0.00 | -0.000    | 0.081    | 8/80/11   | 1.104      | 0.44           |  |
| BASE              | (N= 480) | 0.140     | 0.21          | 0.00 | -0.036    | 0.079    | 16/80/ 3  | 1.023      | 0.58           |  |
| NEW               | (N= 477) | 0.147     | 0.21          | 0.00 | -0.029    | 0.075    | 13/81/ 4  | 0.982      | 0.60           |  |
| CLIM              | (N= 459) | 0.152     | 0.23          | 0.00 | -0.024    | 0.073    | 11/85/ 3  | 0.988      | 0.58           |  |
| AERONET AOD > 0.2 |          |           |               |      |           |          |           |            |                |  |
| RAW               | (N= 308) | 0.303     | 0.80          | 0.00 | 0.001     | 0.108    | 11/77/11  | 1.073      | 0.44           |  |
| BASE              | (N= 156) | 0.244     | 0.60          | 0.00 | -0.050    | 0.114    | 26/69/ 3  | 1.013      | 0.61           |  |
| NEW               | (N= 156) | 0.235     | 0.56          | 0.00 | -0.059    | 0.108    | 23/73/ 2  | 0.965      | 0.63           |  |
| CLIM              | (N= 151) | 0.239     | 0.60          | 0.00 | -0.055    | 0.108    | 23/74/ 2  | 0.969      | 0.61           |  |

| Which | Noise | vs $\tau_A$ |               | vs $\tau_M$ |               | Est.@ | Est.@ | Est.@ | Est.@ | Est.@ |
|-------|-------|-------------|---------------|-------------|---------------|-------|-------|-------|-------|-------|
|       | Floor | Diagnostic  |               | Prognostic  |               | 0.1   | 0.2   | 0.4   | 0.6   | 1.0   |
| RAW   | 0.062 | 0.03        | + 0.15 $\tau$ | -0.02       | + 0.30 $\tau$ | 0.06  | 0.06  | 0.10  | 0.16  | 0.28  |
| BASE  | 0.054 | -0.00       | + 0.30 $\tau$ | -0.03       | + 0.27 $\tau$ | 0.05  | 0.05  | 0.08  | 0.13  | 0.24  |
| NEW   | 0.051 | -0.02       | + 0.34 $\tau$ | -0.02       | + 0.26 $\tau$ | 0.05  | 0.05  | 0.08  | 0.13  | 0.23  |
| CLIM  | 0.048 | -0.03       | + 0.38 $\tau$ | -0.01       | + 0.20 $\tau$ | 0.05  | 0.05  | 0.08  | 0.12  | 0.20  |
