# Supplementary material for: An over-land aerosol optical depth data set for data assimilation by filtering, correction, and aggregation of MODIS Collection 5 optical depth retrievals
Source: Copernicus journal article supplement (doi:10.5194/amt-4-379-2011), 2011-03-01
Supplement: Supplementary file 13 [file ps009_africa_above_equator.pdf › aux_material_lite_rev/l3_region_pages/aqua/ps009_africa_above_equator.pdf]

# A 18.50N 11.50E Africa above equ

AERONET AOD: N= 6829  $\overline{\tau}$ =0.39 eta=0.36

MODIS  $\tau$

x RAW  
 x BASE  
 x NEW  
 x STRONG

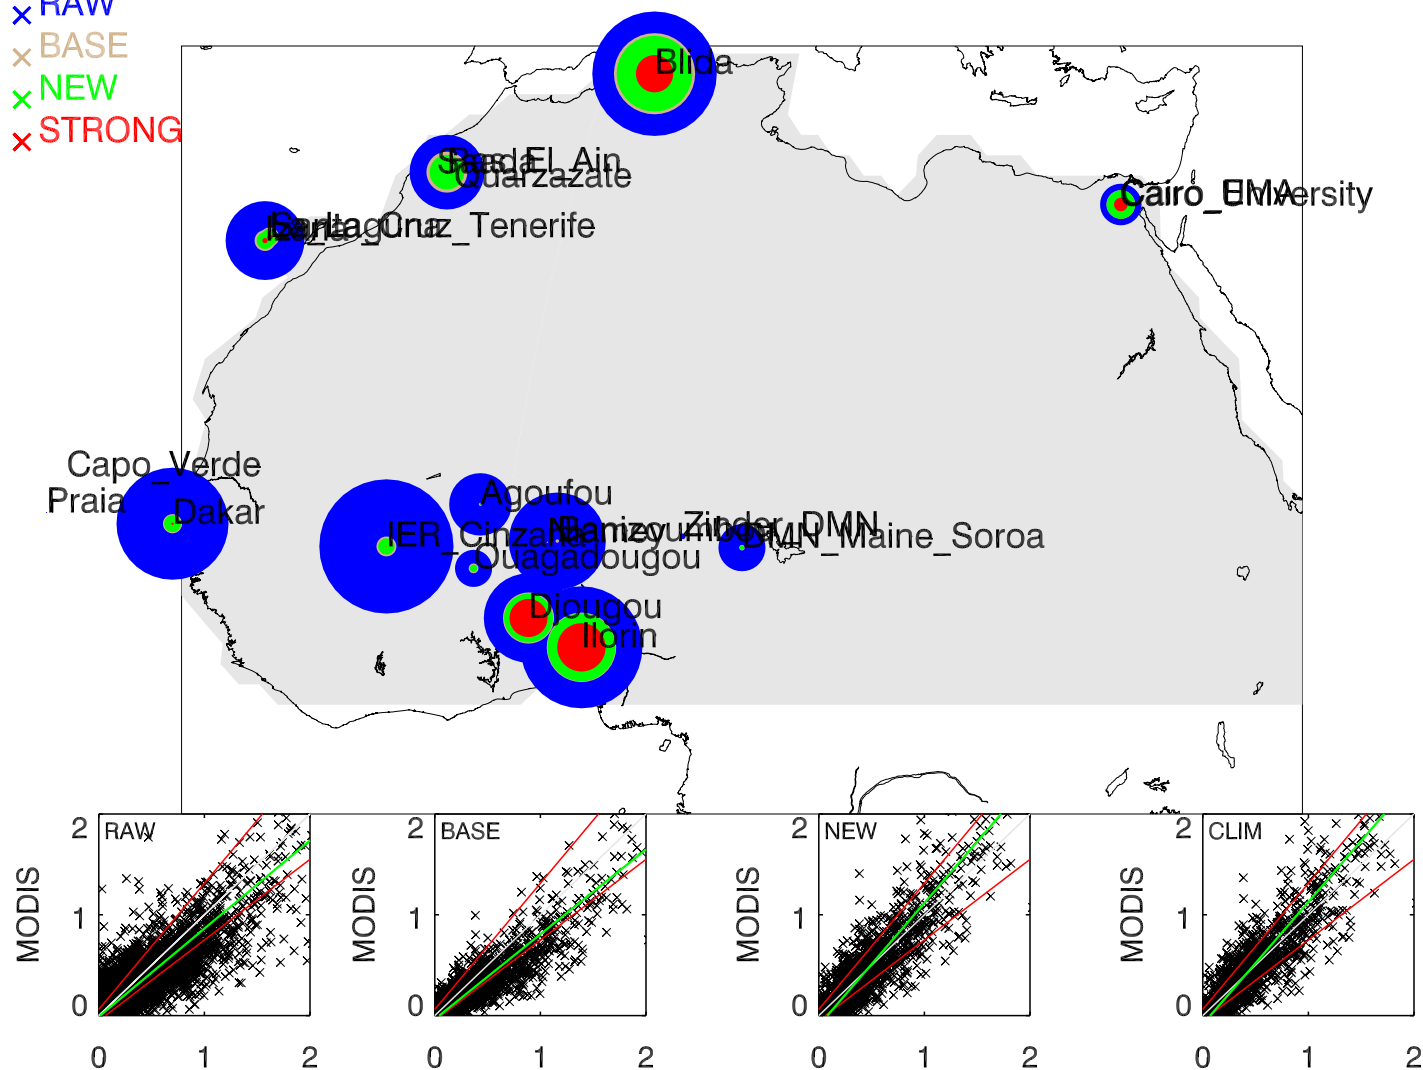

| Which             | AERONET   |       | AERONET |      |               | AERONET |          |           | AERONET    |                |
|-------------------|-----------|-------|---------|------|---------------|---------|----------|-----------|------------|----------------|
|                   |           | MODIS | AOD     |      | MODIS-AERONET |         | % -/in/+ |           | Regression |                |
|                   |           | Mean  | >0.2    | >1.0 | Mean          | Bias    | RMSE     | Tolerance | Slope      | r <sup>2</sup> |
| RAW               | (N= 6334) | 0.327 | 0.63    | 0.03 | -0.060        |         | 0.204    | 28/56/15  | 0.766      | 0.51           |
| BASE              | (N= 2154) | 0.297 | 0.55    | 0.03 | -0.098        |         | 0.190    | 34/58/ 6  | 0.718      | 0.65           |
| NEW               | (N= 1931) | 0.394 | 0.56    | 0.08 | -0.012        |         | 0.194    | 25/58/16  | 0.957      | 0.59           |
| CLIM              | (N= 1837) | 0.414 | 0.59    | 0.08 | 0.002         |         | 0.193    | 19/63/17  | 0.967      | 0.59           |
| AERONET AOD > 0.2 |           |       |         |      |               |         |          |           |            |                |
| RAW               | (N= 4338) | 0.409 | 0.81    | 0.04 | -0.107        |         | 0.230    | 36/56/ 7  | 0.758      | 0.52           |
| BASE              | (N= 1442) | 0.395 | 0.78    | 0.05 | -0.143        |         | 0.226    | 43/53/ 3  | 0.716      | 0.65           |
| NEW               | (N= 1300) | 0.541 | 0.79    | 0.11 | -0.009        |         | 0.227    | 26/56/17  | 0.953      | 0.58           |
| CLIM              | (N= 1234) | 0.570 | 0.83    | 0.12 | 0.008         |         | 0.228    | 20/60/18  | 0.964      | 0.58           |

| Which | Noise | vs $\tau_A$ |             | vs $\tau_M$ |             | Est.@ | Est.@ | Est.@ | Est.@ | Est.@ |
|-------|-------|-------------|-------------|-------------|-------------|-------|-------|-------|-------|-------|
|       | Floor | Diagnostic  |             | Prognostic  |             | 0.1   | 0.2   | 0.4   | 0.6   | 1.0   |
| RAW   | 0.129 | 0.02 +      | 0.28 $\tau$ | 0.08 +      | 0.20 $\tau$ | 0.13  | 0.13  | 0.16  | 0.20  | 0.27  |
| BASE  | 0.072 | -0.01 +     | 0.35 $\tau$ | 0.08 +      | 0.21 $\tau$ | 0.11  | 0.13  | 0.17  | 0.21  | 0.29  |
| NEW   | 0.091 | 0.06 +      | 0.19 $\tau$ | 0.07 +      | 0.14 $\tau$ | 0.09  | 0.09  | 0.12  | 0.15  | 0.20  |
| CLIM  | 0.087 | 0.05 +      | 0.18 $\tau$ | 0.05 +      | 0.16 $\tau$ | 0.09  | 0.09  | 0.12  | 0.15  | 0.21  |
