# Supplementary material for: An over-land aerosol optical depth data set for data assimilation by filtering, correction, and aggregation of MODIS Collection 5 optical depth retrievals
Source: Copernicus journal article supplement (doi:10.5194/amt-4-379-2011), 2011-03-01
Supplement: Supplementary file 14 [file ps010_sw_asia.pdf › aux_material_lite_rev/l3_region_pages/aqua/ps010_sw_asia.pdf]

A

33.50N 50.50E SW Asia

AERONET AOD: N= 79  $\overline{\tau}$ =0.28 eta=0.37

MODIS  $\tau$

- x RAW
- x BASE
- x NEW
- x STRONG

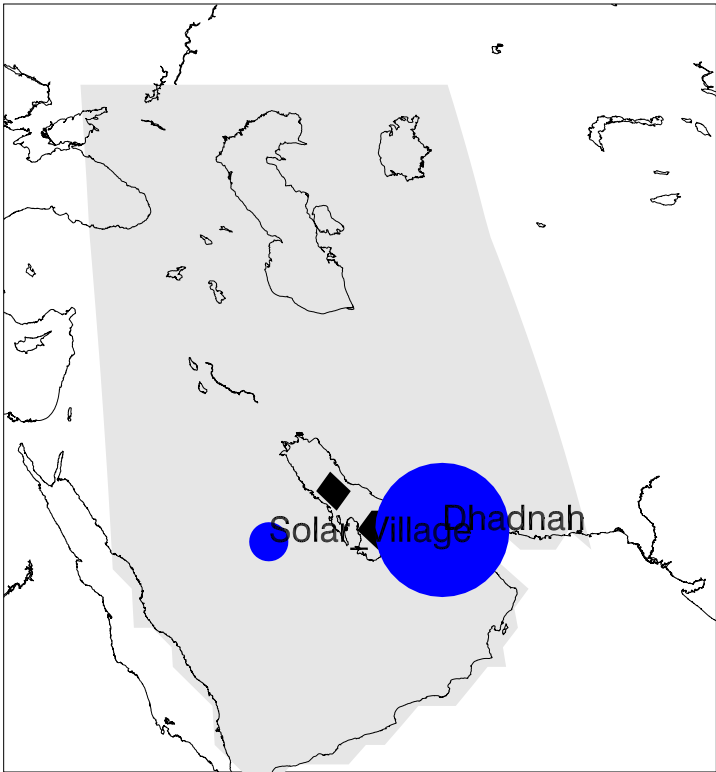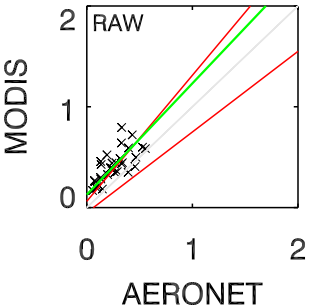

| Which |         | MODIS AOD |      |      | MODIS-AERONET |       | % -/in/+ | Regression |                |
|-------|---------|-----------|------|------|---------------|-------|----------|------------|----------------|
|       |         | Mean      | >0.2 | >1.0 | Mean Bias     | RMSE  |          | Slope      | r <sup>2</sup> |
| RAW   | (N= 31) | 0.417     | 0.90 | 0.00 | 0.156         | 0.191 | 0/32/67  | 1.419      | 0.42           |

|                   |         |       |      |      |       |       |         |       |      |
|-------------------|---------|-------|------|------|-------|-------|---------|-------|------|
| AERONET AOD > 0.2 |         |       |      |      |       |       |         |       |      |
| RAW               | (N= 19) | 0.491 | 1.00 | 0.00 | 0.142 | 0.186 | 0/47/52 | 1.346 | 0.20 |

| Which | Noise Floor | vs $\tau_A$ |                | vs $\tau_M$ |                | Est.@ | Est.@ | Est.@ | Est.@ | Est.@ |
|-------|-------------|-------------|----------------|-------------|----------------|-------|-------|-------|-------|-------|
|       |             | Diagnostic  |                | Prognostic  |                | 0.1   | 0.2   | 0.4   | 0.6   | 1.0   |
| RAW   | 0.199       | *****       | + ***** $\tau$ | *****       | + ***** $\tau$ | 0.20  | 0.20  | 0.20  | 0.20  | 0.20  |
