# Supplementary material for: An over-land aerosol optical depth data set for data assimilation by filtering, correction, and aggregation of MODIS Collection 5 optical depth retrievals
Source: Copernicus journal article supplement (doi:10.5194/amt-4-379-2011), 2011-03-01
Supplement: Supplementary file 15 [file ps011_europe_-_mediterranean.pdf › aux_material_lite_rev/l3_region_pages/aqua/ps011_europe_-_mediterranean.pdf]

A

42.50N 18.50E Europe – Medite

AERONET AOD: N= 18598  $\bar{\tau}$ =0.17 eta=0.61

MODIS  $\tau$

- RAW
- BASE
- NEW
- STRONG

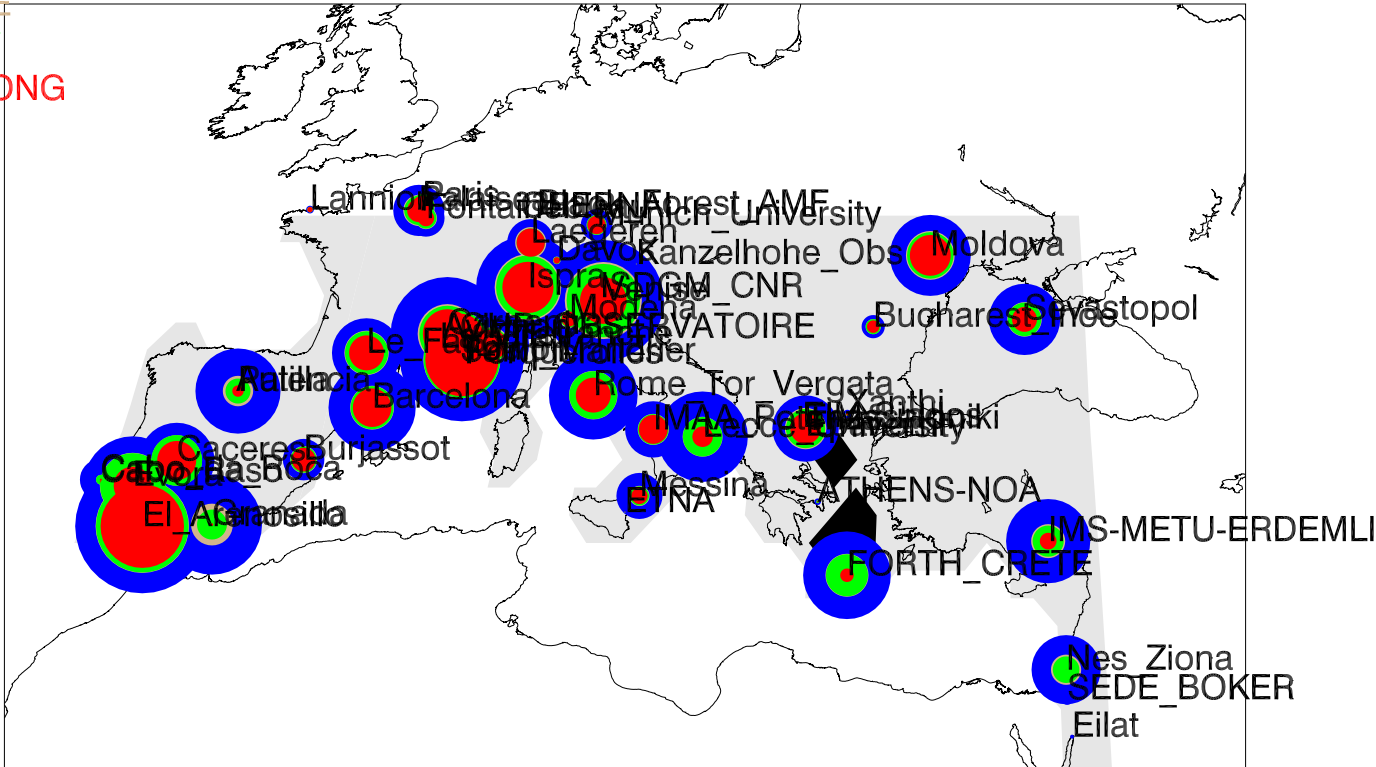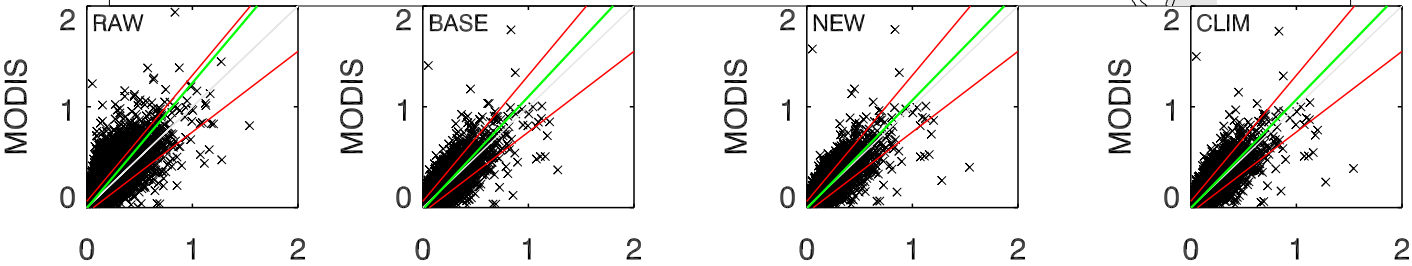

| AERONET           |            | AERONET     |               |             | AERONET     |          |           | AERONET    |                |       |
|-------------------|------------|-------------|---------------|-------------|-------------|----------|-----------|------------|----------------|-------|
| Which             |            | MODIS AOD   | MODIS-AERONET |             |             | % -/in/+ |           | Regression |                |       |
|                   |            | Mean        | >0.2          | >1.0        | Mean Bias   | RMSE     | Tolerance | Slope      | r <sup>2</sup> |       |
| RAW               | (N= 17085) | 0.201       | 0.41          | 0.00        | 0.035       | 0.106    | 5/69/24   | 1.192      | 0.39           |       |
| BASE              | (N= 9309)  | 0.168       | 0.32          | 0.00        | 0.001       | 0.083    | 7/80/11   | 1.055      | 0.47           |       |
| NEW               | (N= 8900)  | 0.170       | 0.31          | 0.00        | 0.003       | 0.078    | 5/84/ 9   | 1.031      | 0.47           |       |
| CLIM              | (N= 8857)  | 0.175       | 0.33          | 0.00        | 0.008       | 0.078    | 5/83/10   | 1.047      | 0.48           |       |
| AERONET AOD > 0.2 |            |             |               |             |             |          |           |            |                |       |
| RAW               | (N= 4927)  | 0.350       | 0.85          | 0.01        | 0.033       | 0.137    | 8/67/23   | 1.113      | 0.37           |       |
| BASE              | (N= 2696)  | 0.311       | 0.79          | 0.00        | -0.006      | 0.119    | 13/73/12  | 1.013      | 0.43           |       |
| NEW               | (N= 2576)  | 0.310       | 0.80          | 0.00        | -0.007      | 0.117    | 12/76/11  | 0.996      | 0.43           |       |
| CLIM              | (N= 2591)  | 0.315       | 0.82          | 0.00        | -0.001      | 0.116    | 11/76/12  | 1.009      | 0.44           |       |
|                   |            |             |               |             |             |          |           |            |                |       |
|                   | Noise      | vs $\tau_A$ |               | vs $\tau_M$ |             | Est.@    | Est.@     | Est.@      | Est.@          | Est.@ |
| Which             | Floor      | Diagnostic  |               | Prognostic  |             | 0.1      | 0.2       | 0.4        | 0.6            | 1.0   |
| RAW               | 0.090      | 0.04 +      | 0.20 $\tau$   | -0.02 +     | 0.39 $\tau$ | 0.09     | 0.09      | 0.14       | 0.22           | 0.37  |
| BASE              | 0.062      | 0.00 +      | 0.27 $\tau$   | -0.01 +     | 0.29 $\tau$ | 0.06     | 0.06      | 0.11       | 0.16           | 0.28  |
| NEW               | 0.055      | -0.01 +     | 0.31 $\tau$   | -0.01 +     | 0.28 $\tau$ | 0.06     | 0.06      | 0.10       | 0.16           | 0.27  |
| CLIM              | 0.056      | -0.00 +     | 0.26 $\tau$   | -0.01 +     | 0.29 $\tau$ | 0.06     | 0.06      | 0.10       | 0.16           | 0.28  |
