# Supplementary material for: An over-land aerosol optical depth data set for data assimilation by filtering, correction, and aggregation of MODIS Collection 5 optical depth retrievals
Source: Copernicus journal article supplement (doi:10.5194/amt-4-379-2011), 2011-03-01
Supplement: Supplementary file 16 [file ps012_eurasian_boreal.pdf › aux_material_lite_rev/l3_region_pages/aqua/ps012_eurasian_boreal.pdf]

A

61.50N 88.50E Eurasian Boreal

AERONET AOD: N= 6651  $\overline{\tau}$ =0.18 eta=0.63

MODIS  $\tau$

- RAW
- BASE
- NEW
- STRONG

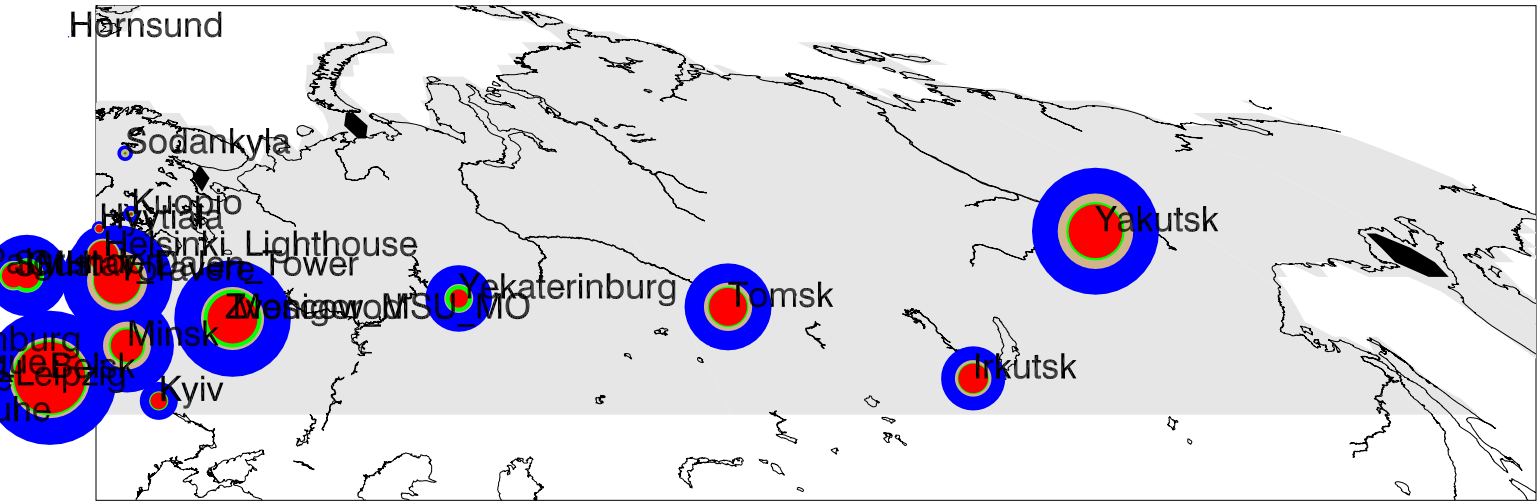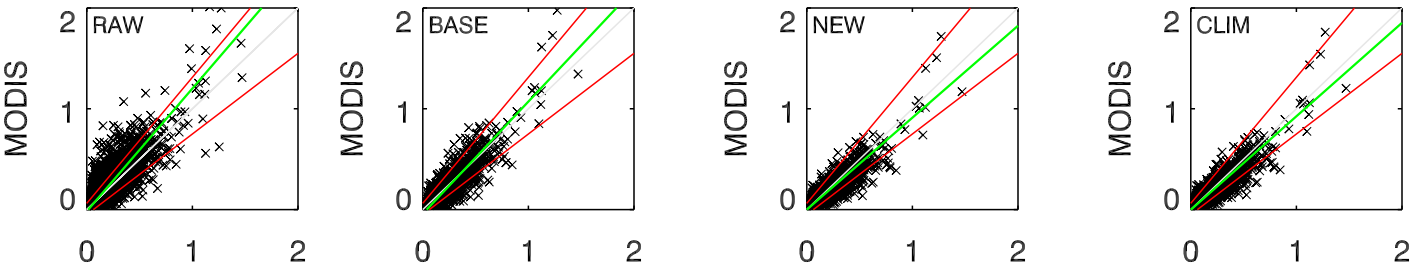

| Which             |           | MODIS AOD |      |      | MODIS-AERONET |       | % -/in/+ | Regression |                |
|-------------------|-----------|-----------|------|------|---------------|-------|----------|------------|----------------|
|                   |           | Mean      | >0.2 | >1.0 | Mean Bias     | RMSE  |          | Slope      | r <sup>2</sup> |
| RAW               | (N= 5806) | 0.201     | 0.40 | 0.00 | 0.022         | 0.098 | 6/73/20  | 1.126      | 0.48           |
| BASE              | (N= 3261) | 0.165     | 0.29 | 0.00 | -0.021        | 0.072 | 10/85/ 4 | 0.989      | 0.66           |
| NEW               | (N= 2969) | 0.168     | 0.28 | 0.00 | -0.016        | 0.065 | 6/90/ 3  | 0.886      | 0.66           |
| CLIM              | (N= 3041) | 0.171     | 0.29 | 0.00 | -0.015        | 0.063 | 6/90/ 3  | 0.897      | 0.69           |
| AERONET AOD > 0.2 |           |           |      |      |               |       |          |            |                |
| RAW               | (N= 1828) | 0.352     | 0.85 | 0.01 | 0.021         | 0.128 | 8/72/18  | 1.072      | 0.49           |
| BASE              | (N= 1092) | 0.309     | 0.74 | 0.01 | -0.023        | 0.102 | 12/79/ 7 | 0.976      | 0.66           |
| NEW               | (N= 986)  | 0.283     | 0.72 | 0.01 | -0.047        | 0.097 | 14/83/ 2 | 0.871      | 0.65           |
| CLIM              | (N= 1022) | 0.288     | 0.74 | 0.01 | -0.043        | 0.094 | 13/83/ 2 | 0.884      | 0.68           |

| Which | Noise | vs $\tau_A$ |               | vs $\tau_M$ |               | Est.@ | Est.@ | Est.@ | Est.@ | Est.@ |
|-------|-------|-------------|---------------|-------------|---------------|-------|-------|-------|-------|-------|
|       | Floor | Diagnostic  |               | Prognostic  |               | 0.1   | 0.2   | 0.4   | 0.6   | 1.0   |
| RAW   | 0.081 | 0.01        | + 0.25 $\tau$ | 0.01        | + 0.27 $\tau$ | 0.08  | 0.08  | 0.12  | 0.17  | 0.28  |
| BASE  | 0.051 | 0.02        | + 0.17 $\tau$ | 0.02        | + 0.13 $\tau$ | 0.05  | 0.05  | 0.08  | 0.10  | 0.16  |
| NEW   | 0.040 | -0.01       | + 0.25 $\tau$ | 0.03        | + 0.11 $\tau$ | 0.04  | 0.05  | 0.08  | 0.10  | 0.14  |
| CLIM  | 0.039 | 0.00        | + 0.20 $\tau$ | 0.03        | + 0.09 $\tau$ | 0.04  | 0.05  | 0.07  | 0.09  | 0.13  |
