# Supplementary material for: An over-land aerosol optical depth data set for data assimilation by filtering, correction, and aggregation of MODIS Collection 5 optical depth retrievals
Source: Copernicus journal article supplement (doi:10.5194/amt-4-379-2011), 2011-03-01
Supplement: Supplementary file 17 [file ps013_east_asia_mid-latitudes.pdf › aux_material_lite_rev/l3_region_pages/aqua/ps013_east_asia_mid-latitudes.pdf]

# A 38.50N 103.50E East Asia Mid-L

AERONET AOD: N= 5386  $\bar{\tau}$ =0.43 eta=0.60

MODIS  $\tau$

× RAW  
× BASE  
× NEW  
× STRONG

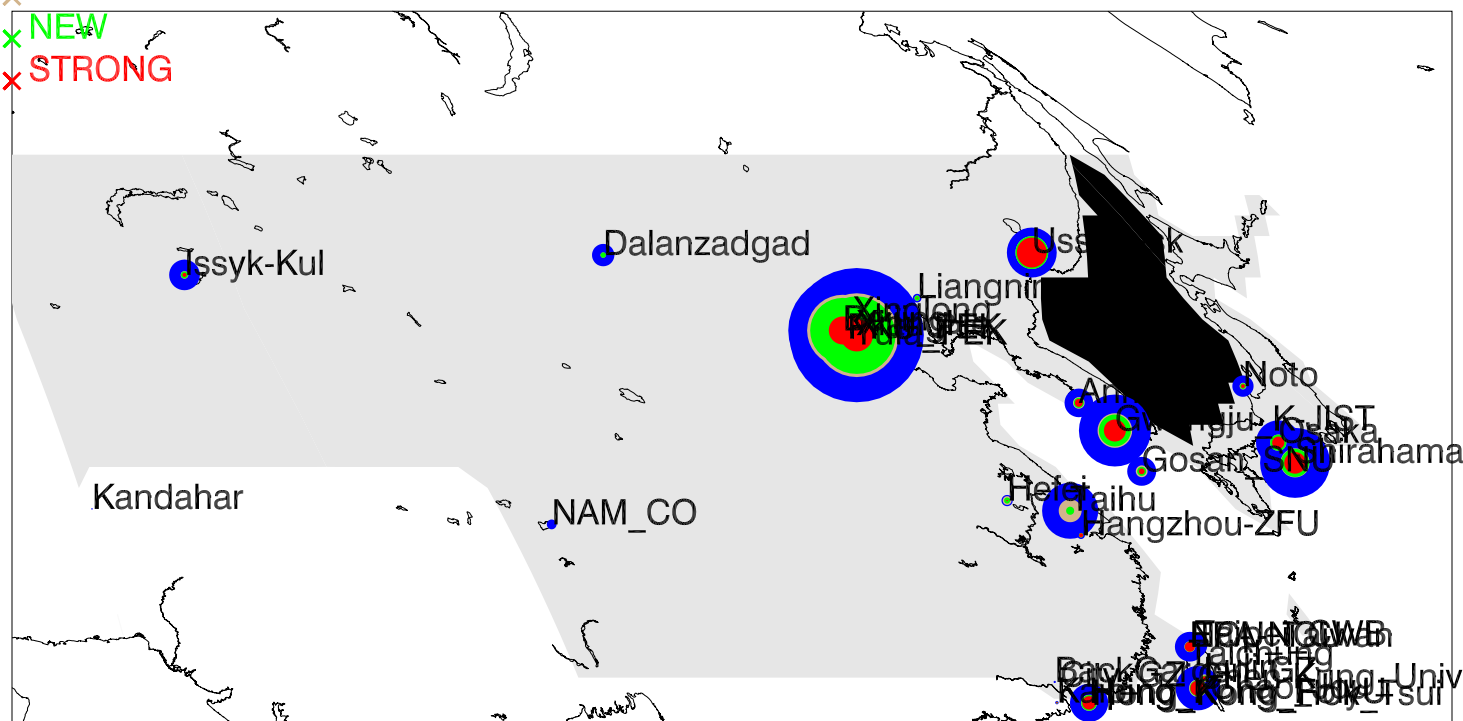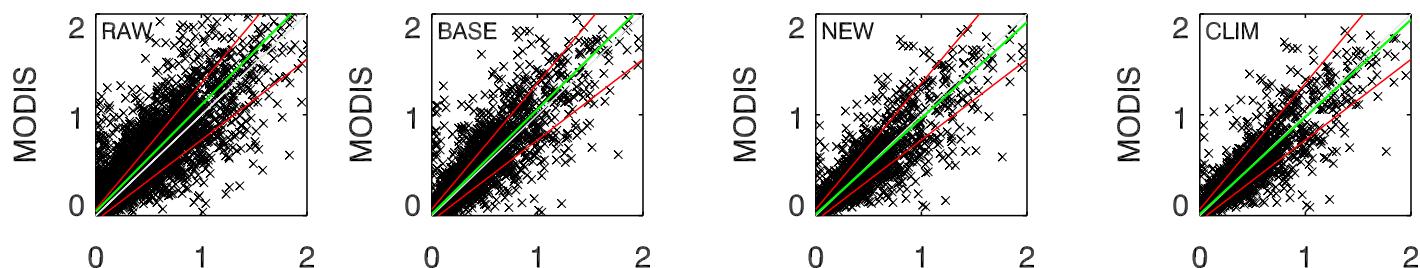

| AERONET           |           | AERONET   |               |      | AERONET   |          |           | AERONET    |                |
|-------------------|-----------|-----------|---------------|------|-----------|----------|-----------|------------|----------------|
| Which             |           | MODIS AOD | MODIS-AERONET |      |           | % -/in/+ |           | Regression |                |
|                   |           | Mean      | >0.2          | >1.0 | Mean Bias | RMSE     | Tolerance | Slope      | r <sup>2</sup> |
| RAW               | (N= 4981) | 0.511     | 0.76          | 0.11 | 0.066     | 0.251    | 9/55/34   | 1.009      | 0.51           |
| BASE              | (N= 2376) | 0.490     | 0.71          | 0.11 | 0.033     | 0.242    | 14/59/25  | 0.999      | 0.51           |
| NEW               | (N= 2131) | 0.435     | 0.68          | 0.09 | -0.007    | 0.212    | 13/70/16  | 0.922      | 0.57           |
| CLIM              | (N= 2026) | 0.441     | 0.69          | 0.09 | -0.001    | 0.203    | 11/71/16  | 0.931      | 0.61           |
| AERONET AOD > 0.2 |           |           |               |      |           |          |           |            |                |
| RAW               | (N= 3352) | 0.660     | 0.94          | 0.17 | 0.057     | 0.281    | 13/55/30  | 0.996      | 0.49           |
| BASE              | (N= 1658) | 0.628     | 0.90          | 0.16 | 0.026     | 0.267    | 17/57/25  | 0.992      | 0.52           |
| NEW               | (N= 1459) | 0.565     | 0.90          | 0.12 | -0.025    | 0.247    | 19/65/15  | 0.918      | 0.56           |
| CLIM              | (N= 1386) | 0.571     | 0.91          | 0.13 | -0.018    | 0.235    | 17/67/15  | 0.926      | 0.60           |

| Which | Noise | vs $\tau_A$ |             | vs $\tau_M$ |             | Est.@ | Est.@ | Est.@ | Est.@ | Est.@ |
|-------|-------|-------------|-------------|-------------|-------------|-------|-------|-------|-------|-------|
|       | Floor | Diagnostic  |             | Prognostic  |             | 0.1   | 0.2   | 0.4   | 0.6   | 1.0   |
| RAW   | 0.174 | 0.05 +      | 0.23 $\tau$ | 0.04 +      | 0.25 $\tau$ | 0.17  | 0.17  | 0.17  | 0.19  | 0.29  |
| BASE  | 0.168 | 0.05 +      | 0.22 $\tau$ | 0.03 +      | 0.24 $\tau$ | 0.17  | 0.17  | 0.17  | 0.17  | 0.27  |
| NEW   | 0.100 | 0.01 +      | 0.26 $\tau$ | 0.04 +      | 0.19 $\tau$ | 0.10  | 0.10  | 0.12  | 0.16  | 0.24  |
| CLIM  | 0.101 | 0.01 +      | 0.25 $\tau$ | 0.03 +      | 0.20 $\tau$ | 0.10  | 0.10  | 0.11  | 0.15  | 0.23  |
