# Supplementary material for: An over-land aerosol optical depth data set for data assimilation by filtering, correction, and aggregation of MODIS Collection 5 optical depth retrievals
Source: Copernicus journal article supplement (doi:10.5194/amt-4-379-2011), 2011-03-01
Supplement: Supplementary file 18 [file ps014_peninsular_southeast_asia.pdf › aux_material_lite_rev/l3_region_pages/aqua/ps014_peninsular_southeast_asia.pdf]

A

17.50N 102.00E Peninsular Sout

AERONET AOD: N= 1780  $\overline{\tau}$ =0.42 eta=0.66

MODIS  $\tau$

- RAW
- BASE
- NEW
- STRONG

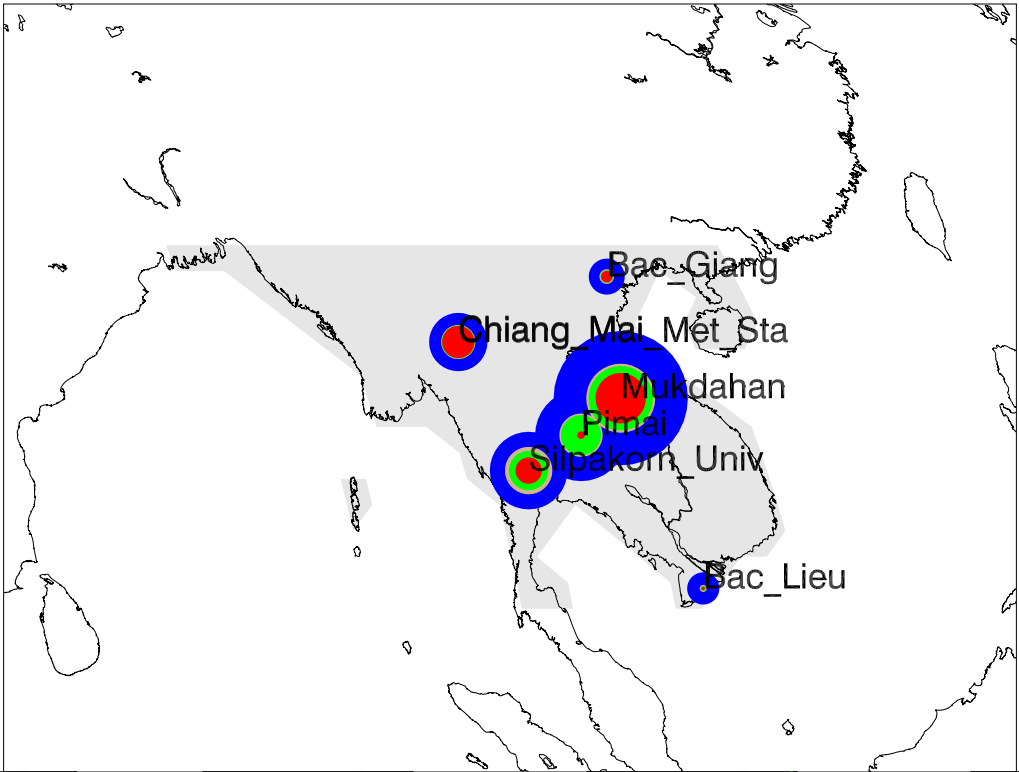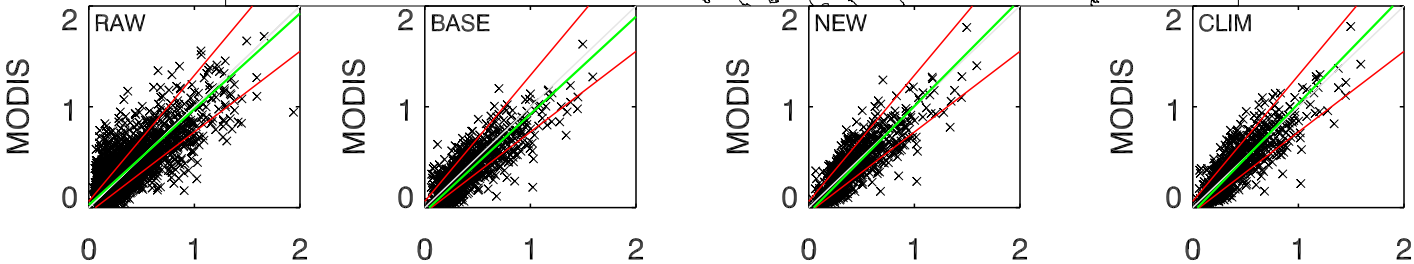

| Which             | AERONET   |       | AERONET       |      |        | AERONET  |       |            | AERONET |                |
|-------------------|-----------|-------|---------------|------|--------|----------|-------|------------|---------|----------------|
|                   | MODIS     | AOD   | MODIS-AERONET |      |        | % -/in/+ |       | Regression |         |                |
|                   |           | Mean  | >0.2          | >1.0 | Mean   | Bias     | RMSE  | Tolerance  | Slope   | r <sup>2</sup> |
| RAW               | (N= 1721) | 0.414 | 0.77          | 0.04 | 0.006  |          | 0.199 | 21/51/27   | 0.928   | 0.48           |
| BASE              | (N= 860)  | 0.361 | 0.68          | 0.02 | -0.054 |          | 0.158 | 30/57/12   | 0.879   | 0.60           |
| NEW               | (N= 778)  | 0.386 | 0.69          | 0.03 | -0.027 |          | 0.144 | 25/62/12   | 0.952   | 0.61           |
| CLIM              | (N= 779)  | 0.398 | 0.70          | 0.03 | -0.015 |          | 0.145 | 22/63/14   | 0.979   | 0.61           |
| AERONET AOD > 0.2 |           |       |               |      |        |          |       |            |         |                |
| RAW               | (N= 1278) | 0.475 | 0.86          | 0.05 | -0.028 |          | 0.199 | 24/57/18   | 0.909   | 0.49           |
| BASE              | (N= 686)  | 0.421 | 0.81          | 0.03 | -0.065 |          | 0.167 | 30/59/10   | 0.875   | 0.60           |
| NEW               | (N= 630)  | 0.450 | 0.82          | 0.03 | -0.027 |          | 0.155 | 23/63/13   | 0.950   | 0.60           |
| CLIM              | (N= 629)  | 0.464 | 0.84          | 0.04 | -0.013 |          | 0.155 | 20/63/15   | 0.976   | 0.61           |

| Which | Noise | vs $\tau_A$ |               | vs $\tau_M$ |               | Est.@ | Est.@ | Est.@ | Est.@ | Est.@ |
|-------|-------|-------------|---------------|-------------|---------------|-------|-------|-------|-------|-------|
|       | Floor | Diagnostic  |               | Prognostic  |               | 0.1   | 0.2   | 0.4   | 0.6   | 1.0   |
| RAW   | 0.199 | 0.08        | + 0.13 $\tau$ | 0.07        | + 0.18 $\tau$ | 0.20  | 0.20  | 0.20  | 0.20  | 0.25  |
| BASE  | 0.115 | 0.06        | + 0.15 $\tau$ | 0.08        | + 0.10 $\tau$ | 0.11  | 0.11  | 0.12  | 0.14  | 0.18  |
| NEW   | 0.087 | 0.07        | + 0.12 $\tau$ | 0.05        | + 0.13 $\tau$ | 0.09  | 0.09  | 0.10  | 0.13  | 0.18  |
| CLIM  | 0.092 | 0.08        | + 0.09 $\tau$ | 0.06        | + 0.11 $\tau$ | 0.09  | 0.09  | 0.11  | 0.13  | 0.17  |
