# Supplementary material for: An over-land aerosol optical depth data set for data assimilation by filtering, correction, and aggregation of MODIS Collection 5 optical depth retrievals
Source: Copernicus journal article supplement (doi:10.5194/amt-4-379-2011), 2011-03-01
Supplement: Supplementary file 19 [file ps015_indian_subcontinent.pdf › aux_material_lite_rev/l3_region_pages/aqua/ps015_indian_subcontinent.pdf]

A

24.50N 77.50E Indian Subcontinent

AERONET AOD: N= 1312  $\overline{\tau}$ =0.48 eta=0.52

MODIS  $\tau$

- RAW
- BASE
- NEW
- STRONG

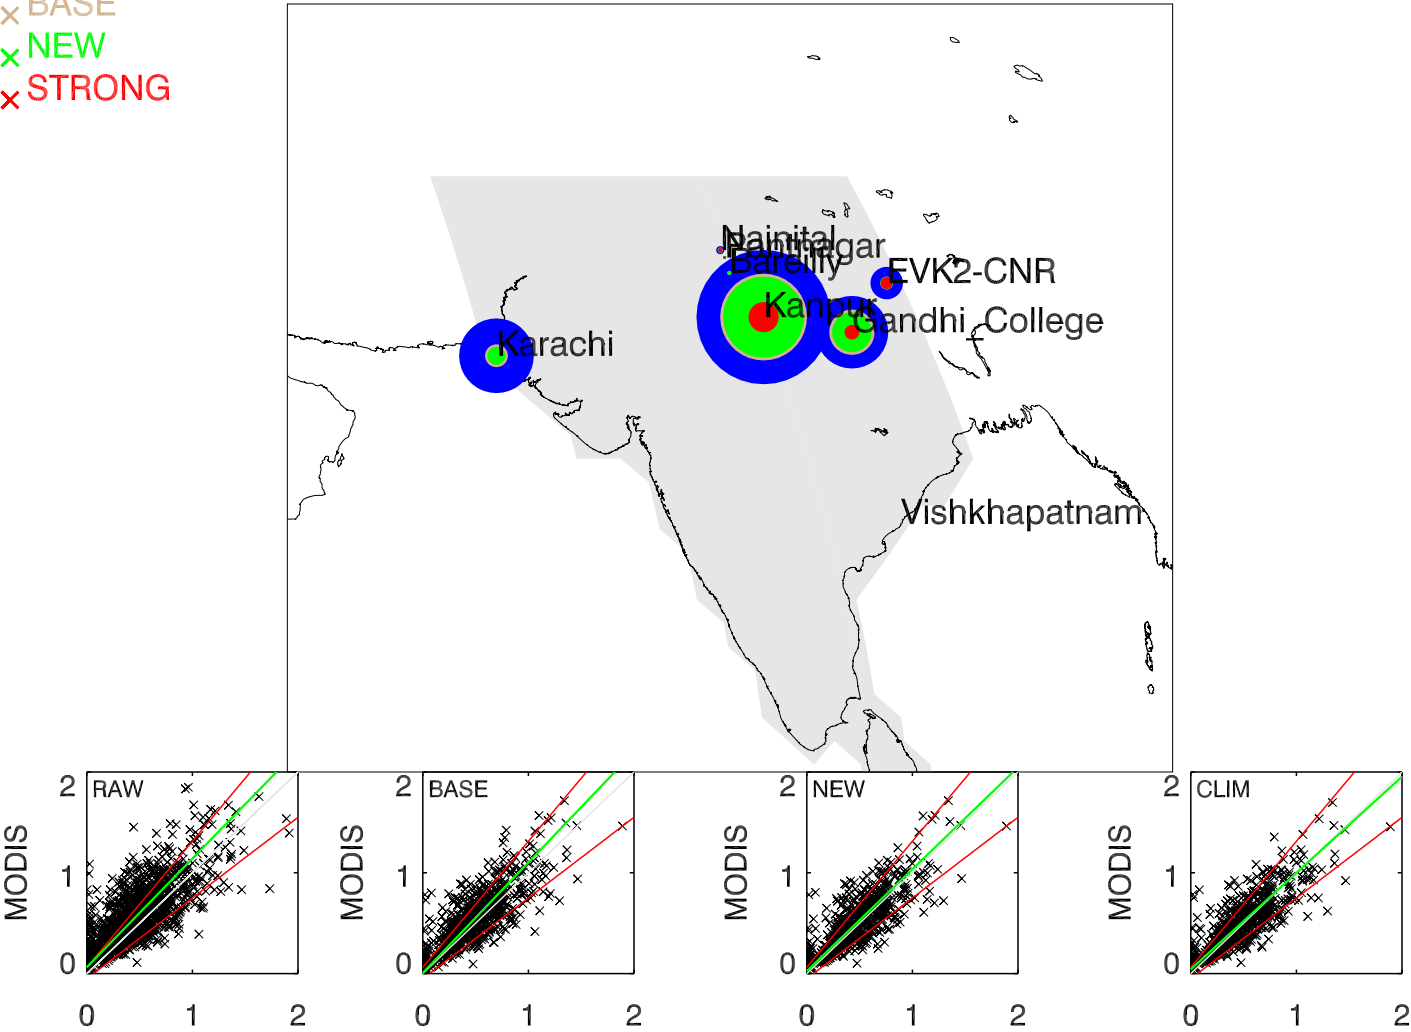

| AERONET           |           |             | AERONET       |             |             | AERONET  |           |       | AERONET    |                |
|-------------------|-----------|-------------|---------------|-------------|-------------|----------|-----------|-------|------------|----------------|
| Which             |           | MODIS AOD   | MODIS-AERONET |             |             | % -/in/+ |           |       | Regression |                |
|                   |           | Mean        | >0.2          | >1.0        | Mean Bias   | RMSE     | Tolerance |       | Slope      | r <sup>2</sup> |
| RAW               | (N= 1277) | 0.588       | 0.93          | 0.09        | 0.101       | 0.245    | 7/52/40   |       | 1.066      | 0.44           |
| BASE              | (N= 686)  | 0.554       | 0.90          | 0.08        | 0.054       | 0.207    | 8/61/29   |       | 1.024      | 0.51           |
| NEW               | (N= 622)  | 0.515       | 0.89          | 0.05        | 0.030       | 0.175    | 10/65/24  |       | 0.995      | 0.50           |
| CLIM              | (N= 613)  | 0.511       | 0.89          | 0.05        | 0.021       | 0.172    | 10/65/23  |       | 0.976      | 0.53           |
| AERONET AOD > 0.2 |           |             |               |             |             |          |           |       |            |                |
| RAW               | (N= 1079) | 0.644       | 0.98          | 0.10        | 0.083       | 0.241    | 8/58/33   |       | 1.059      | 0.41           |
| BASE              | (N= 604)  | 0.600       | 0.98          | 0.09        | 0.044       | 0.206    | 9/64/25   |       | 1.021      | 0.52           |
| NEW               | (N= 545)  | 0.559       | 0.97          | 0.06        | 0.017       | 0.171    | 11/68/19  |       | 0.992      | 0.52           |
| CLIM              | (N= 534)  | 0.555       | 0.97          | 0.06        | 0.004       | 0.163    | 12/70/17  |       | 0.973      | 0.57           |
|                   |           |             |               |             |             |          |           |       |            |                |
|                   | Noise     | vs $\tau_A$ |               | vs $\tau_M$ |             | Est.@    | Est.@     | Est.@ | Est.@      | Est.@          |
| Which             | Floor     | Diagnostic  |               | Prognostic  |             | 0.1      | 0.2       | 0.4   | 0.6        | 1.0            |
| RAW               | 0.268     | 0.11 +      | 0.10 $\tau$   | 0.03 +      | 0.25 $\tau$ | 0.27     | 0.27      | 0.27  | 0.27       | 0.28           |
| BASE              | 0.215     | 0.06 +      | 0.14 $\tau$   | 0.03 +      | 0.19 $\tau$ | 0.22     | 0.22      | 0.22  | 0.22       | 0.22           |
| NEW               | 0.200     | 0.05 +      | 0.15 $\tau$   | 0.04 +      | 0.17 $\tau$ | 0.20     | 0.20      | 0.20  | 0.20       | 0.21           |
| CLIM              | 0.221     | 0.04 +      | 0.15 $\tau$   | 0.04 +      | 0.17 $\tau$ | 0.22     | 0.22      | 0.22  | 0.22       | 0.22           |
