# Supplementary material for: An over-land aerosol optical depth data set for data assimilation by filtering, correction, and aggregation of MODIS Collection 5 optical depth retrievals
Source: Copernicus journal article supplement (doi:10.5194/amt-4-379-2011), 2011-03-01
Supplement: Supplementary file 20 [file ps016_insular_southeast_asia.pdf › aux_material_lite_rev/l3_region_pages/aqua/ps016_insular_southeast_asia.pdf]

A

2.50S 121.50E Insular Southeast Asia

AERONET AOD: N= 99  $\overline{\tau}$ =0.34 eta=0.61

MODIS  $\tau$

- RAW
- BASE
- NEW
- STRONG

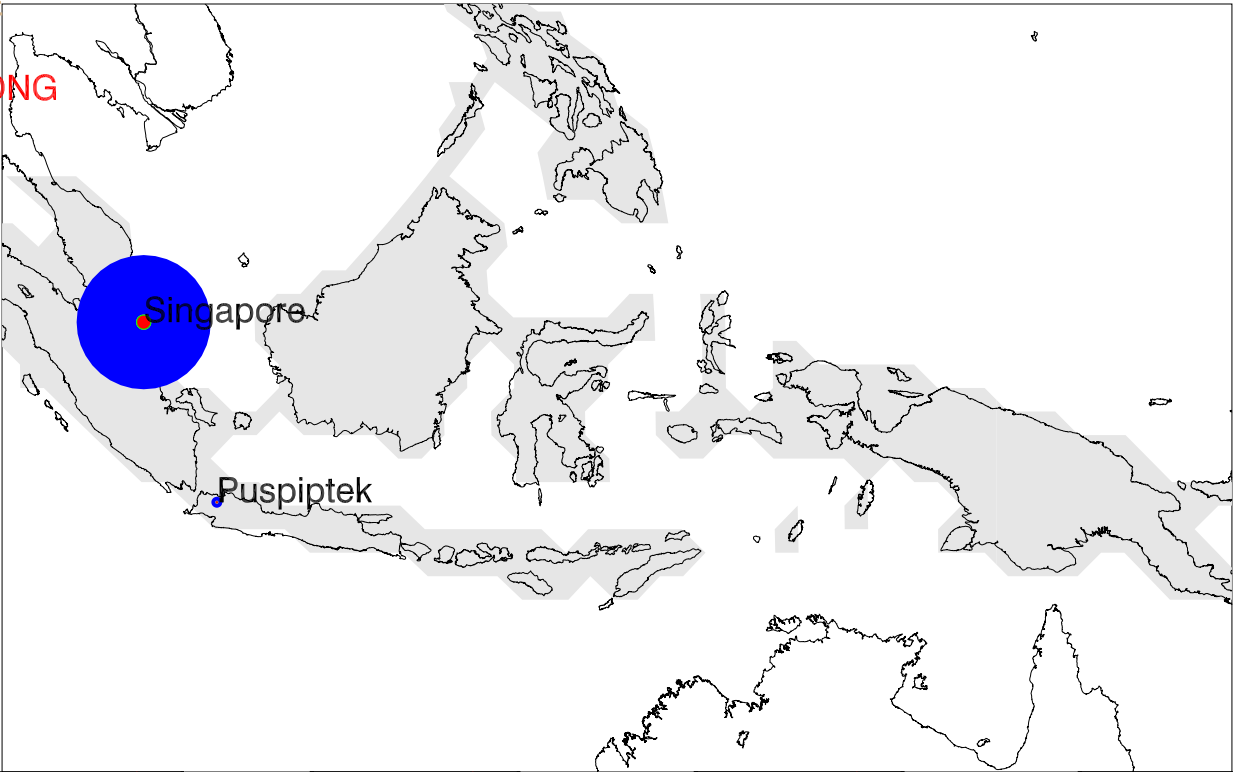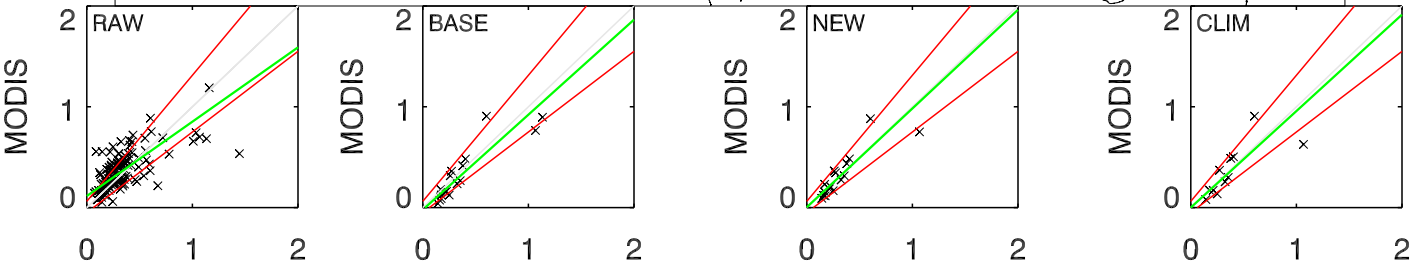

| AERONET           |          |           | AERONET       |      |           | AERONET  |           |  | AERONET    |                |
|-------------------|----------|-----------|---------------|------|-----------|----------|-----------|--|------------|----------------|
| Which             |          | MODIS AOD | MODIS-AERONET |      |           | % -/in/+ |           |  | Regression |                |
|                   |          | Mean      | >0.2          | >1.0 | Mean Bias | RMSE     | Tolerance |  | Slope      | r <sup>2</sup> |
| RAW               | (N= 133) | 0.372     | 0.84          | 0.02 | 0.024     | 0.190    | 12/55/31  |  | 0.863      | 0.47           |
| BASE              | (N= 17)  | 0.329     | 0.53          | 0.00 | -0.042    | 0.138    | 23/70/ 5  |  | 0.889      | 0.70           |
| NEW               | (N= 16)  | 0.320     | 0.62          | 0.00 | -0.003    | 0.119    | 6/81/12   |  | 0.959      | 0.66           |
| CLIM              | (N= 11)  | 0.365     | 0.64          | 0.00 | -0.016    | 0.177    | 18/72/ 9  |  | 0.896      | 0.34           |
| AERONET AOD > 0.2 |          |           |               |      |           |          |           |  |            |                |
| RAW               | (N= 102) | 0.419     | 0.96          | 0.02 | 0.009     | 0.203    | 15/53/30  |  | 0.849      | 0.47           |
| BASE              | (N= 12)  | 0.424     | 0.75          | 0.00 | -0.034    | 0.157    | 16/75/ 8  |  | 0.889      | 0.70           |
| NEW               | (N= 11)  | 0.401     | 0.82          | 0.00 | 0.005     | 0.140    | 9/72/18   |  | 0.954      | 0.63           |
| CLIM              | (N= 9)   | 0.418     | 0.78          | 0.00 | -0.012    | 0.195    | 22/66/11  |  | 0.896      | 0.34           |

| Which | Noise | vs $\tau_A$ |                | vs $\tau_M$ |                | Est.@ | Est.@ | Est.@ | Est.@ | Est.@ |
|-------|-------|-------------|----------------|-------------|----------------|-------|-------|-------|-------|-------|
|       | Floor | Diagnostic  |                | Prognostic  |                | 0.1   | 0.2   | 0.4   | 0.6   | 1.0   |
| RAW   | 0.139 | 0.02        | + 0.27 $\tau$  | -0.04       | + 0.44 $\tau$  | 0.14  | 0.14  | 0.14  | 0.22  | 0.40  |
| BASE  | 0.074 | *****       | + ***** $\tau$ | *****       | + ***** $\tau$ | 0.07  | 0.07  | 0.07  | 0.07  | 0.07  |
| NEW   | 0.049 | *****       | + ***** $\tau$ | *****       | + ***** $\tau$ | 0.05  | 0.05  | 0.05  | 0.05  | 0.05  |
| CLIM  | 0.044 | *****       | + ***** $\tau$ | *****       | + ***** $\tau$ | 0.04  | 0.04  | 0.04  | 0.04  | 0.04  |
