# Supplementary material for: An over-land aerosol optical depth data set for data assimilation by filtering, correction, and aggregation of MODIS Collection 5 optical depth retrievals
Source: Copernicus journal article supplement (doi:10.5194/amt-4-379-2011), 2011-03-01
Supplement: Supplementary file 21 [file ps017_australian_continent.pdf › aux_material_lite_rev/l3_region_pages/aqua/ps017_australian_continent.pdf]

A

26.50S 137.50E Australian Conti

AERONET AOD: N= 3094  $\overline{\tau}$ =0.09 eta=0.50

MODIS  $\tau$

- RAW
- BASE
- NEW
- STRONG

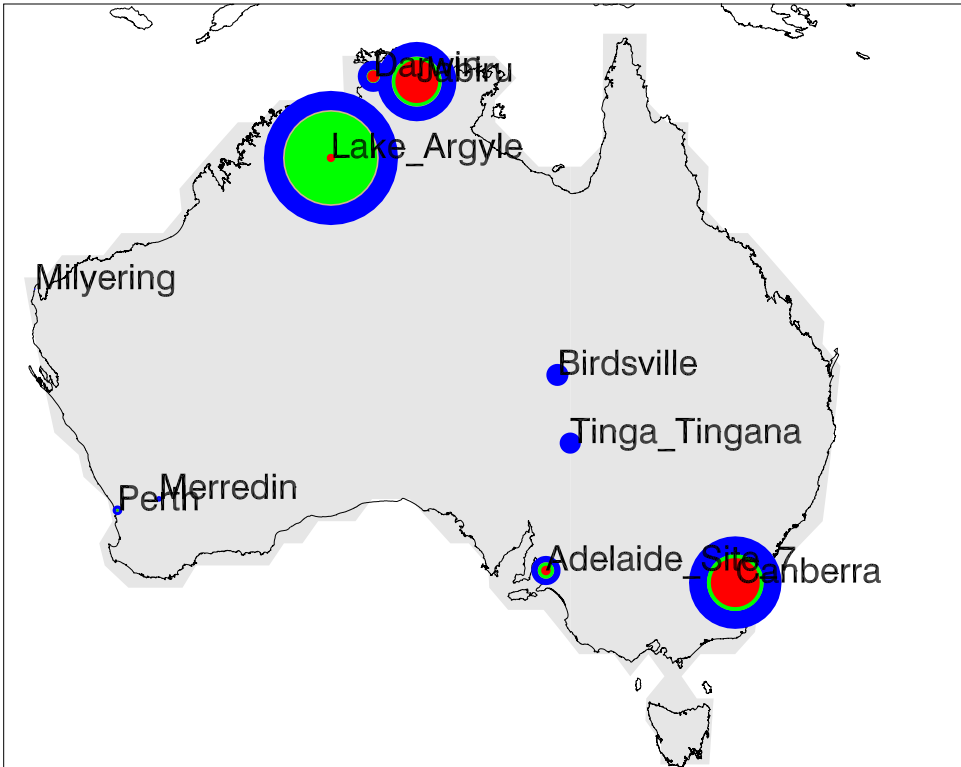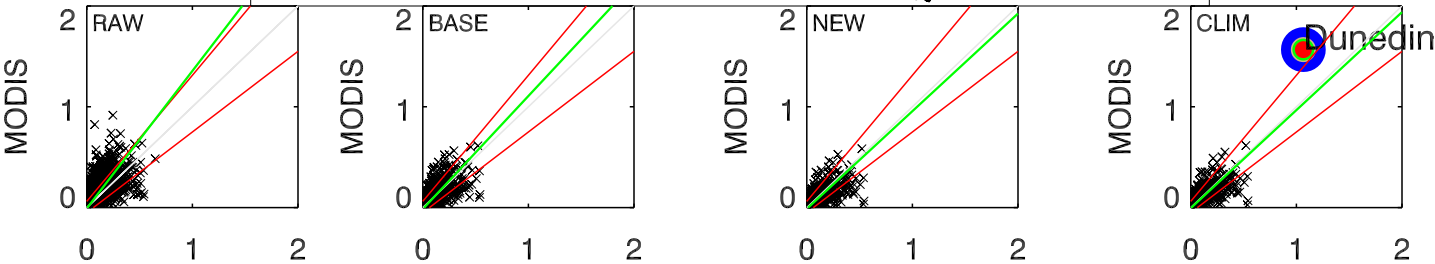

| Which             |           | MODIS AOD |      |      | MODIS-AERONET |       | % -/in/+ | Regression |                |
|-------------------|-----------|-----------|------|------|---------------|-------|----------|------------|----------------|
|                   |           | Mean      | >0.2 | >1.0 | Mean Bias     | RMSE  |          | Slope      | r <sup>2</sup> |
| RAW               | (N= 3011) | 0.112     | 0.18 | 0.00 | 0.024         | 0.089 | 6/71/22  | 1.339      | 0.11           |
| BASE              | (N= 1667) | 0.078     | 0.09 | 0.00 | -0.005        | 0.063 | 6/84/ 8  | 1.127      | 0.13           |
| NEW               | (N= 1618) | 0.068     | 0.06 | 0.00 | -0.015        | 0.057 | 6/88/ 4  | 0.959      | 0.09           |
| CLIM              | (N= 1588) | 0.074     | 0.06 | 0.00 | -0.007        | 0.055 | 4/89/ 5  | 0.986      | 0.12           |
| AERONET AOD > 0.2 |           |           |      |      |               |       |          |            |                |
| RAW               | (N= 281)  | 0.295     | 0.74 | 0.00 | 0.007         | 0.158 | 20/55/23 | 1.123      | 0.01           |
| BASE              | (N= 123)  | 0.246     | 0.58 | 0.00 | -0.049        | 0.143 | 32/55/12 | 0.994      | 0.04           |
| NEW               | (N= 118)  | 0.211     | 0.51 | 0.00 | -0.085        | 0.150 | 42/50/ 7 | 0.880      | 0.04           |
| CLIM              | (N= 112)  | 0.220     | 0.54 | 0.00 | -0.077        | 0.147 | 35/57/ 7 | 0.900      | 0.05           |

| Which | Noise | vs $\tau_A$ |               | vs $\tau_M$ |               | Est.@ | Est.@ | Est.@ | Est.@ | Est.@ |
|-------|-------|-------------|---------------|-------------|---------------|-------|-------|-------|-------|-------|
|       | Floor | Diagnostic  |               | Prognostic  |               | 0.1   | 0.2   | 0.4   | 0.6   | 1.0   |
| RAW   | 0.078 | 0.04        | + 0.29 $\tau$ | -0.07       | + 0.71 $\tau$ | 0.08  | 0.08  | 0.21  | 0.35  | 0.64  |
| BASE  | 0.051 | -0.06       | + 0.59 $\tau$ | -0.00       | + 0.39 $\tau$ | 0.05  | 0.07  | 0.15  | 0.23  | 0.39  |
| NEW   | 0.042 | -0.06       | + 0.62 $\tau$ | -0.00       | + 0.34 $\tau$ | 0.04  | 0.06  | 0.13  | 0.20  | 0.34  |
| CLIM  | 0.040 | -0.11       | + 0.76 $\tau$ | -0.03       | + 0.42 $\tau$ | 0.04  | 0.06  | 0.14  | 0.23  | 0.40  |
