# Supplementary material for: An over-land aerosol optical depth data set for data assimilation by filtering, correction, and aggregation of MODIS Collection 5 optical depth retrievals
Source: Copernicus journal article supplement (doi:10.5194/amt-4-379-2011), 2011-03-01
Supplement: Supplementary file 22 [file ps000_ocean_na.pdf › aux_material_lite_rev/l3_region_pages/terra/ps000_ocean_na.pdf]

T 21.50S 15.50W ocean\_NA  
AERONET AOD: N= 1015  $\overline{\tau}$ =0.02 eta=0.57

MODIS  $\tau$

- x RAW
- x BASE
- x NEW
- x STRONG

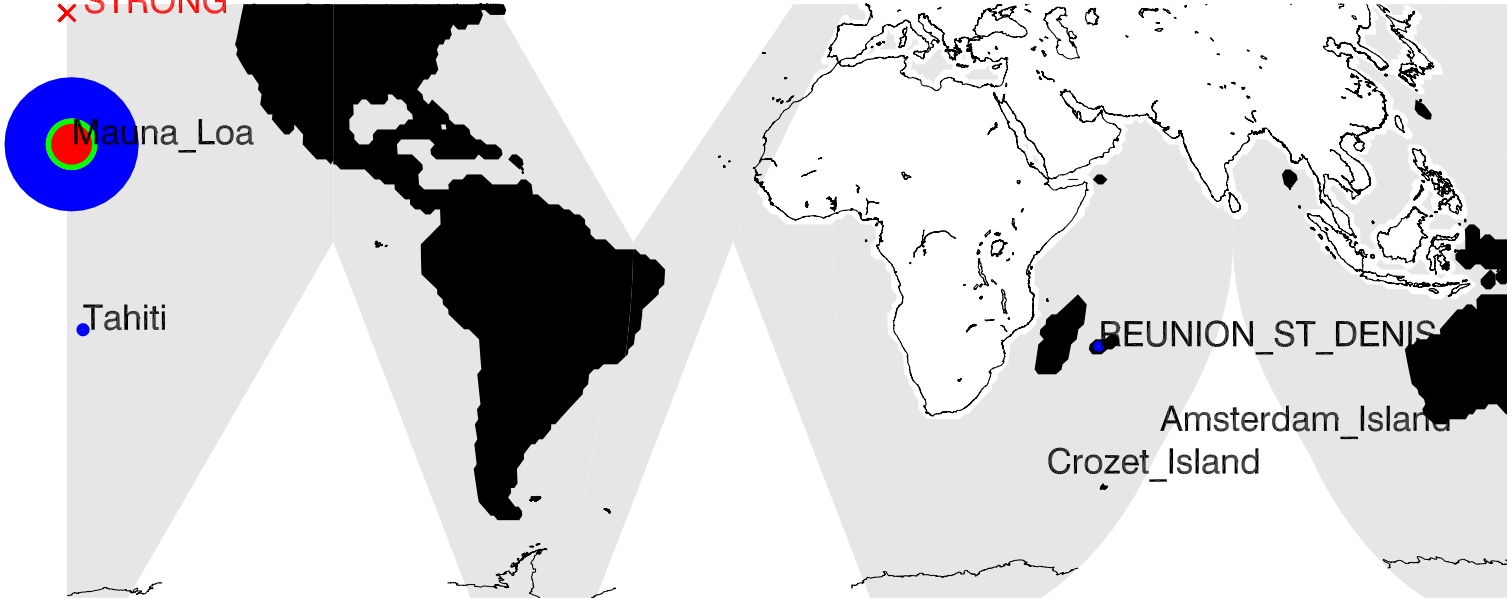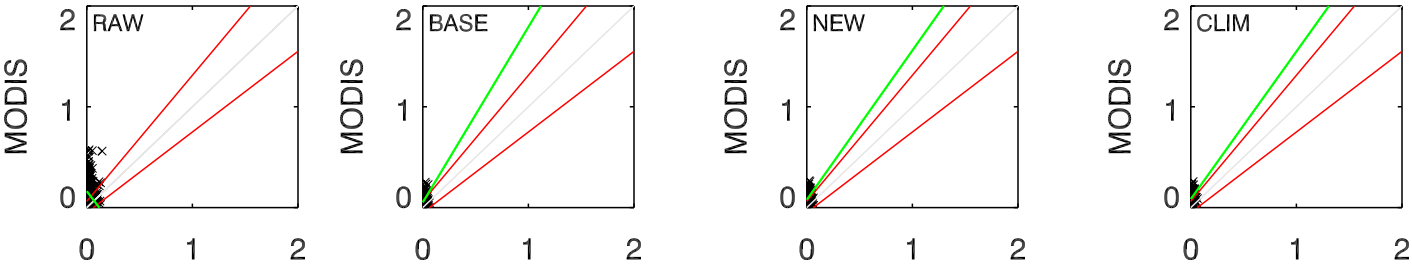

| Which | AERONET   | MODIS AOD |      |      | MODIS-AERONET |       | % -/in/+<br>Tolerance | Regression |                |
|-------|-----------|-----------|------|------|---------------|-------|-----------------------|------------|----------------|
|       |           | Mean      | >0.2 | >1.0 | Mean Bias     | RMSE  |                       | Slope      | r <sup>2</sup> |
| RAW   | (N= 1015) | 0.135     | 0.18 | 0.00 | 0.114         | 0.146 | 1/21/77               | 6.878      | 0.02           |
| BASE  | (N= 334)  | 0.074     | 0.01 | 0.00 | 0.061         | 0.075 | 0/44/54               | 6.129      | 0.80           |
| NEW   | (N= 331)  | 0.097     | 0.02 | 0.00 | 0.084         | 0.094 | 0/20/79               | 11.519     | 0.48           |
| CLIM  | (N= 300)  | 0.103     | 0.02 | 0.00 | 0.091         | 0.099 | 0/16/83               | 12.912     | 0.18           |

AERONET AOD > 0.2

| Which | Noise | vs $\tau_A$ |                | vs $\tau_M$ |                | Est.@ | Est.@ | Est.@ | Est.@ | Est.@ |
|-------|-------|-------------|----------------|-------------|----------------|-------|-------|-------|-------|-------|
|       | Floor | Diagnostic  |                | Prognostic  |                | 0.1   | 0.2   | 0.4   | 0.6   | 1.0   |
| RAW   | 0.146 | *****       | + ***** $\tau$ | -0.01       | + 0.95 $\tau$  | 0.15  | 0.18  | 0.37  | 0.56  | 0.95  |
| BASE  | 0.075 | *****       | + ***** $\tau$ | *****       | + ***** $\tau$ | 0.07  | 0.07  | 0.07  | 0.07  | 0.07  |
| NEW   | 0.094 | *****       | + ***** $\tau$ | *****       | + ***** $\tau$ | 0.09  | 0.09  | 0.09  | 0.09  | 0.09  |
| CLIM  | 0.099 | *****       | + ***** $\tau$ | *****       | + ***** $\tau$ | 0.10  | 0.10  | 0.10  | 0.10  | 0.10  |
