# Supplementary material for: An over-land aerosol optical depth data set for data assimilation by filtering, correction, and aggregation of MODIS Collection 5 optical depth retrievals
Source: Copernicus journal article supplement (doi:10.5194/amt-4-379-2011), 2011-03-01
Supplement: Supplementary file 23 [file ps001_n._american_boreal.pdf › aux_material_lite_rev/l3_region_pages/terra/ps001_n._american_boreal.pdf]

T 66.50N 90.50W N. American Bo  
AERONET AOD: N= 2853  $\bar{\tau}$ =0.09 eta=0.63

MODIS  $\tau$

x RAW  
x BASE  
x NEW  
x STRONG

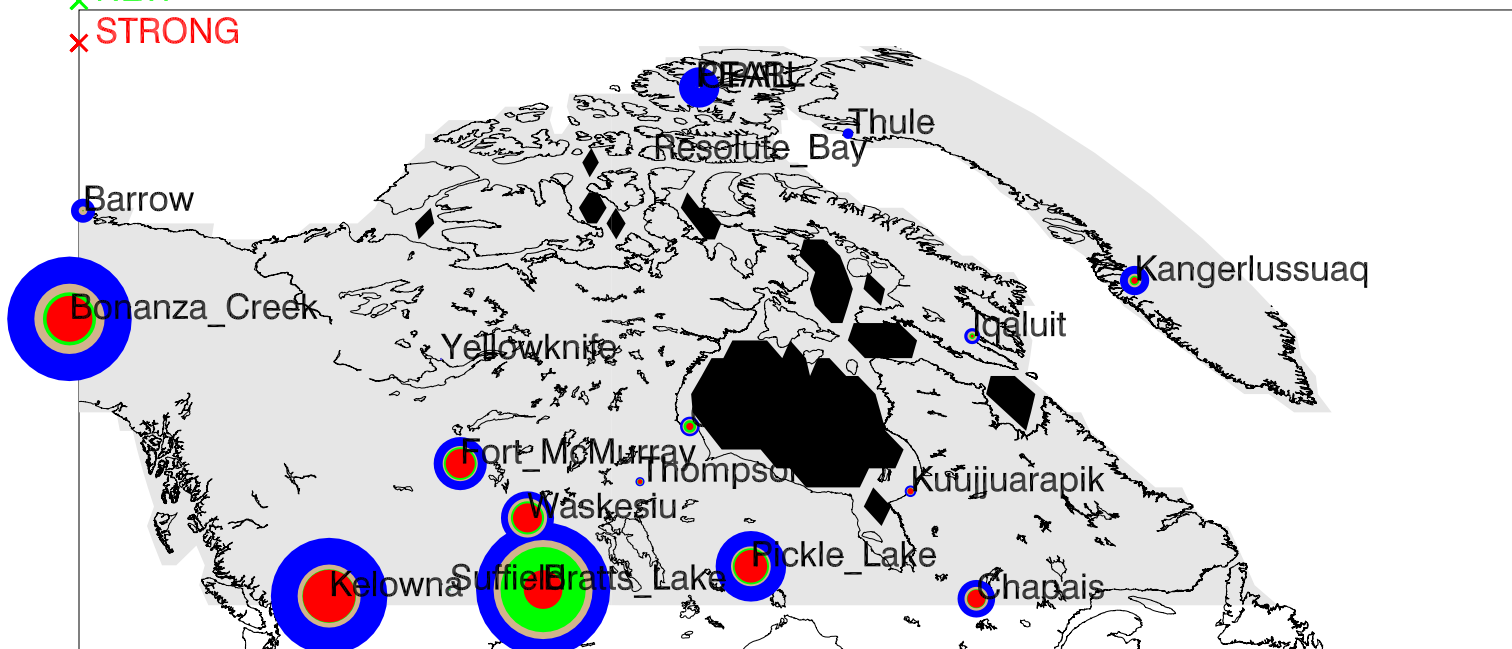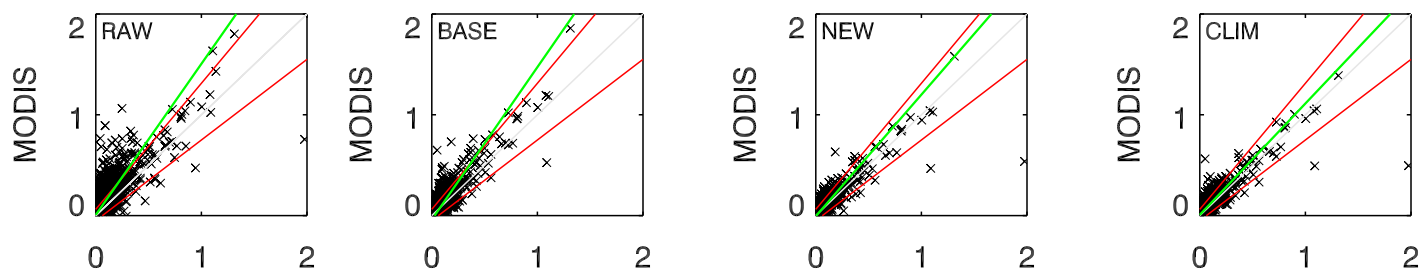

| Which             | AERONET   |       |      |      | AERONET       |       |          |       | AERONET   |       |                |  | AERONET    |  |  |  |
|-------------------|-----------|-------|------|------|---------------|-------|----------|-------|-----------|-------|----------------|--|------------|--|--|--|
|                   | MODIS AOD |       |      |      | MODIS-AERONET |       |          |       | % -/in/+  |       |                |  | Regression |  |  |  |
|                   | Mean      |       | >0.2 | >1.0 | Mean Bias     | RMSE  |          |       | Tolerance | Slope | r <sup>2</sup> |  |            |  |  |  |
| RAW               | (N= 2850) | 0.145 | 0.22 | 0.01 | 0.053         | 0.129 | 3/60/35  | 1.257 | 0.49      |       |                |  |            |  |  |  |
| BASE              | (N= 1574) | 0.108 | 0.12 | 0.01 | 0.010         | 0.105 | 3/84/12  | 1.184 | 0.70      |       |                |  |            |  |  |  |
| NEW               | (N= 1286) | 0.115 | 0.11 | 0.00 | 0.014         | 0.099 | 2/84/12  | 0.889 | 0.61      |       |                |  |            |  |  |  |
| CLIM              | (N= 1348) | 0.123 | 0.12 | 0.00 | 0.018         | 0.079 | 1/83/15  | 0.923 | 0.64      |       |                |  |            |  |  |  |
| AERONET AOD > 0.2 |           |       |      |      |               |       |          |       |           |       |                |  |            |  |  |  |
| RAW               | (N= 205)  | 0.484 | 0.89 | 0.07 | 0.100         | 0.278 | 8/56/35  | 1.089 | 0.44      |       |                |  |            |  |  |  |
| BASE              | (N= 116)  | 0.460 | 0.83 | 0.07 | 0.062         | 0.227 | 11/67/21 | 1.113 | 0.74      |       |                |  |            |  |  |  |
| NEW               | (N= 99)   | 0.428 | 0.81 | 0.05 | -0.000        | 0.235 | 13/74/12 | 0.844 | 0.53      |       |                |  |            |  |  |  |
| CLIM              | (N= 111)  | 0.418 | 0.80 | 0.05 | 0.001         | 0.217 | 9/79/10  | 0.875 | 0.58      |       |                |  |            |  |  |  |

| Which | Noise | vs $\tau_A$ |   |             |  | vs $\tau_M$ |   |             |  | Est.@ | Est.@ | Est.@ | Est.@ | Est.@ |
|-------|-------|-------------|---|-------------|--|-------------|---|-------------|--|-------|-------|-------|-------|-------|
|       | Floor | Diagnostic  |   |             |  | Prognostic  |   |             |  | 0.1   | 0.2   | 0.4   | 0.6   | 1.0   |
| RAW   | 0.109 | -0.09       | + | 0.68 $\tau$ |  | 0.06        | + | 0.33 $\tau$ |  | 0.11  | 0.12  | 0.19  | 0.25  | 0.38  |
| BASE  | 0.089 | -0.04       | + | 0.42 $\tau$ |  | 0.09        | + | 0.09 $\tau$ |  | 0.10  | 0.10  | 0.12  | 0.14  | 0.18  |
| NEW   | 0.078 | -0.03       | + | 0.29 $\tau$ |  | 0.07        | + | 0.06 $\tau$ |  | 0.08  | 0.09  | 0.10  | 0.11  | 0.13  |
| CLIM  | 0.051 | -0.00       | + | 0.21 $\tau$ |  | 0.06        | + | 0.10 $\tau$ |  | 0.07  | 0.08  | 0.10  | 0.12  | 0.16  |
