# Supplementary material for: An over-land aerosol optical depth data set for data assimilation by filtering, correction, and aggregation of MODIS Collection 5 optical depth retrievals
Source: Copernicus journal article supplement (doi:10.5194/amt-4-379-2011), 2011-03-01
Supplement: Supplementary file 24 [file ps002_e._conus.pdf › aux_material_lite_rev/l3_region_pages/terra/ps002_e._conus.pdf]

# T 40.50N 84.50W E. CONUS

## AERONET AOD: N= 9412 $\bar{\tau}=0.16$ eta=0.64

MODIS  $\tau$

- RAW
- BASE
- NEW
- STRONG

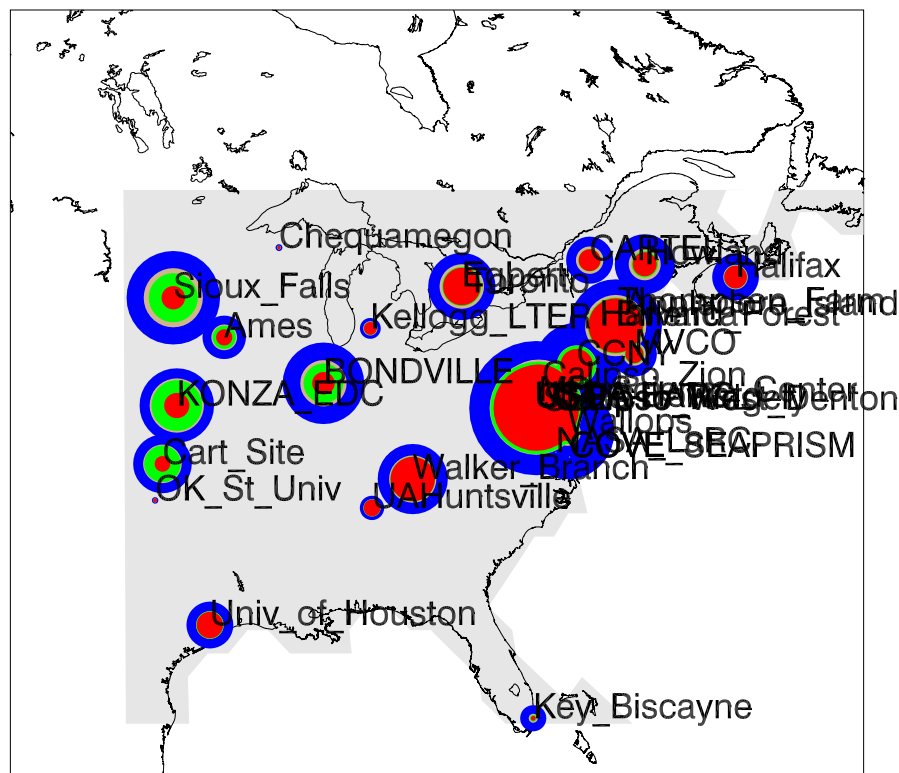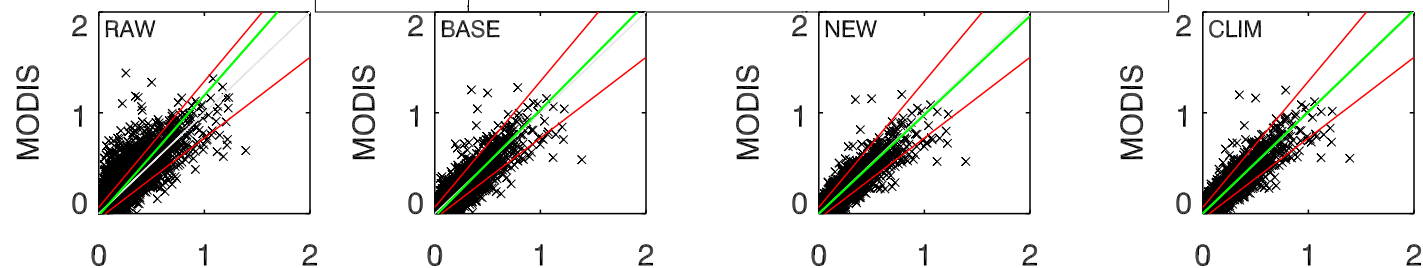

| AERONET           |           |             | AERONET       |             |             | AERONET  |           |       | AERONET    |                |
|-------------------|-----------|-------------|---------------|-------------|-------------|----------|-----------|-------|------------|----------------|
| Which             |           | MODIS AOD   | MODIS-AERONET |             |             | % -/in/+ |           |       | Regression |                |
|                   |           | Mean        | >0.2          | >1.0        | Mean Bias   | RMSE     | Tolerance |       | Slope      | r <sup>2</sup> |
| RAW               | (N= 9407) | 0.172       | 0.31          | 0.00        | 0.013       | 0.098    | 11/72/16  |       | 1.098      | 0.54           |
| BASE              | (N= 5487) | 0.137       | 0.22          | 0.00        | -0.019      | 0.075    | 12/81/ 5  |       | 0.973      | 0.62           |
| NEW               | (N= 5057) | 0.157       | 0.26          | 0.00        | -0.003      | 0.066    | 5/88/ 6   |       | 0.957      | 0.66           |
| CLIM              | (N= 4819) | 0.168       | 0.28          | 0.00        | 0.003       | 0.068    | 4/88/ 7   |       | 0.989      | 0.67           |
| AERONET AOD > 0.2 |           |             |               |             |             |          |           |       |            |                |
| RAW               | (N= 2298) | 0.397       | 0.88          | 0.01        | 0.028       | 0.142    | 9/70/20   |       | 1.057      | 0.51           |
| BASE              | (N= 1283) | 0.346       | 0.79          | 0.01        | -0.023      | 0.121    | 15/75/ 8  |       | 0.958      | 0.59           |
| NEW               | (N= 1234) | 0.355       | 0.85          | 0.01        | -0.017      | 0.110    | 11/81/ 7  |       | 0.941      | 0.62           |
| CLIM              | (N= 1232) | 0.364       | 0.86          | 0.01        | -0.006      | 0.111    | 10/80/ 9  |       | 0.971      | 0.62           |
|                   | Noise     | vs $\tau_A$ |               | vs $\tau_M$ |             | Est.@    | Est.@     | Est.@ | Est.@      | Est.@          |
| Which             | Floor     | Diagnostic  |               | Prognostic  |             | 0.1      | 0.2       | 0.4   | 0.6        | 1.0            |
| RAW               | 0.079     | 0.06 +      | 0.12 $\tau$   | 0.01 +      | 0.27 $\tau$ | 0.08     | 0.08      | 0.12  | 0.17       | 0.28           |
| BASE              | 0.054     | 0.01 +      | 0.21 $\tau$   | 0.01 +      | 0.20 $\tau$ | 0.05     | 0.05      | 0.09  | 0.13       | 0.21           |
| NEW               | 0.043     | -0.01 +     | 0.23 $\tau$   | 0.01 +      | 0.17 $\tau$ | 0.04     | 0.05      | 0.08  | 0.12       | 0.19           |
| CLIM              | 0.044     | -0.00 +     | 0.23 $\tau$   | -0.00 +     | 0.22 $\tau$ | 0.04     | 0.04      | 0.09  | 0.13       | 0.22           |
