# Supplementary material for: An over-land aerosol optical depth data set for data assimilation by filtering, correction, and aggregation of MODIS Collection 5 optical depth retrievals
Source: Copernicus journal article supplement (doi:10.5194/amt-4-379-2011), 2011-03-01
Supplement: Supplementary file 26 [file ps004_central_america.pdf › aux_material_lite_rev/l3_region_pages/terra/ps004_central_america.pdf]

T

18.50N 87.50W Central America

AERONET AOD: N= 1079  $\overline{\tau}$ =0.31 eta=0.59

MODIS  $\tau$

- RAW
- BASE
- NEW
- STRONG

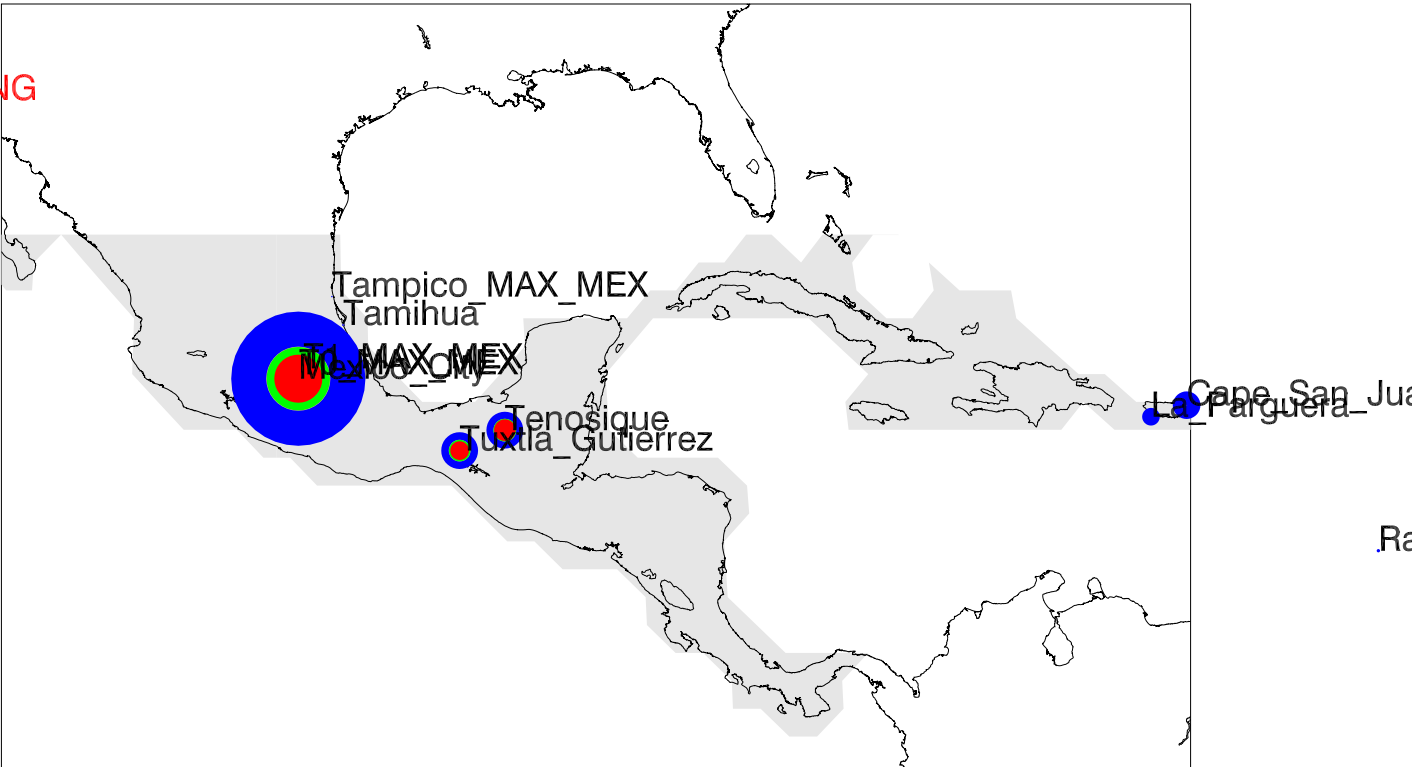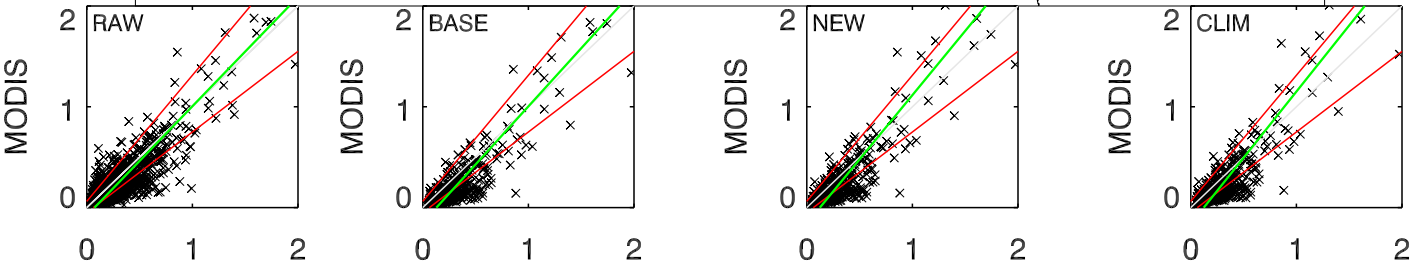

| Which             |           | MODIS AOD |             |        | MODIS-AERONET |       | % -/in/+  |       | Regression |                |
|-------------------|-----------|-----------|-------------|--------|---------------|-------|-----------|-------|------------|----------------|
|                   |           | Mean      | >0.2        | >1.0   | Mean Bias     | RMSE  | Tolerance |       | Slope      | r <sup>2</sup> |
| RAW               | (N= 1079) | 0.255     | 0.45        | 0.02   | -0.053        | 0.155 | 28/62/ 8  |       | 0.852      | 0.55           |
| BASE              | (N= 454)  | 0.223     | 0.29        | 0.03   | -0.099        | 0.174 | 51/44/ 4  |       | 0.821      | 0.65           |
| NEW               | (N= 448)  | 0.252     | 0.33        | 0.03   | -0.070        | 0.185 | 39/55/ 5  |       | 0.881      | 0.63           |
| CLIM              | (N= 452)  | 0.262     | 0.35        | 0.03   | -0.061        | 0.184 | 35/57/ 6  |       | 0.896      | 0.63           |
| AERONET AOD > 0.2 |           |           |             |        |               |       |           |       |            |                |
| RAW               | (N= 644)  | 0.349     | 0.65        | 0.03   | -0.087        | 0.189 | 38/55/ 5  |       | 0.840      | 0.56           |
| BASE              | (N= 296)  | 0.300     | 0.43        | 0.04   | -0.123        | 0.208 | 58/36/ 4  |       | 0.820      | 0.64           |
| NEW               | (N= 291)  | 0.334     | 0.48        | 0.05   | -0.090        | 0.225 | 49/43/ 6  |       | 0.877      | 0.61           |
| CLIM              | (N= 296)  | 0.344     | 0.50        | 0.05   | -0.078        | 0.223 | 46/45/ 7  |       | 0.891      | 0.61           |
|                   |           |           |             |        |               |       |           |       |            |                |
| Which             |           | Noise     | vs $\tau_A$ |        | vs $\tau_M$   |       | Est.@     | Est.@ | Est.@      | Est.@          |
|                   |           | Floor     | Diagnostic  |        | Prognostic    |       | 0.1       | 0.2   | 0.4        | 0.6            |
| RAW               | 0.080     | 0.04 +    | 0.23 $\tau$ | 0.09 + | 0.07 $\tau$   | 0.10  | 0.11      | 0.12  | 0.14       | 0.17           |
| BASE              | 0.077     | 0.06 +    | 0.24 $\tau$ | 0.07 + | 0.16 $\tau$   | 0.08  | 0.10      | 0.13  | 0.16       | 0.23           |
| NEW               | 0.063     | 0.05 +    | 0.25 $\tau$ | 0.06 + | 0.11 $\tau$   | 0.07  | 0.09      | 0.11  | 0.13       | 0.17           |
| CLIM              | 0.060     | 0.03 +    | 0.28 $\tau$ | 0.07 + | 0.11 $\tau$   | 0.08  | 0.09      | 0.11  | 0.13       | 0.18           |
