# Supplementary material for: An over-land aerosol optical depth data set for data assimilation by filtering, correction, and aggregation of MODIS Collection 5 optical depth retrievals
Source: Copernicus journal article supplement (doi:10.5194/amt-4-379-2011), 2011-03-01
Supplement: Supplementary file 27 [file ps005_south_america.pdf › aux_material_lite_rev/l3_region_pages/terra/ps005_south_america.pdf]

# T 6.50S 60.50W South America

AERONET AOD: N= 2172  $\bar{\tau}$ =0.29 eta=0.59

MODIS  $\tau$

x RAW  
 x BASE  
 x NEW  
 x STRONG

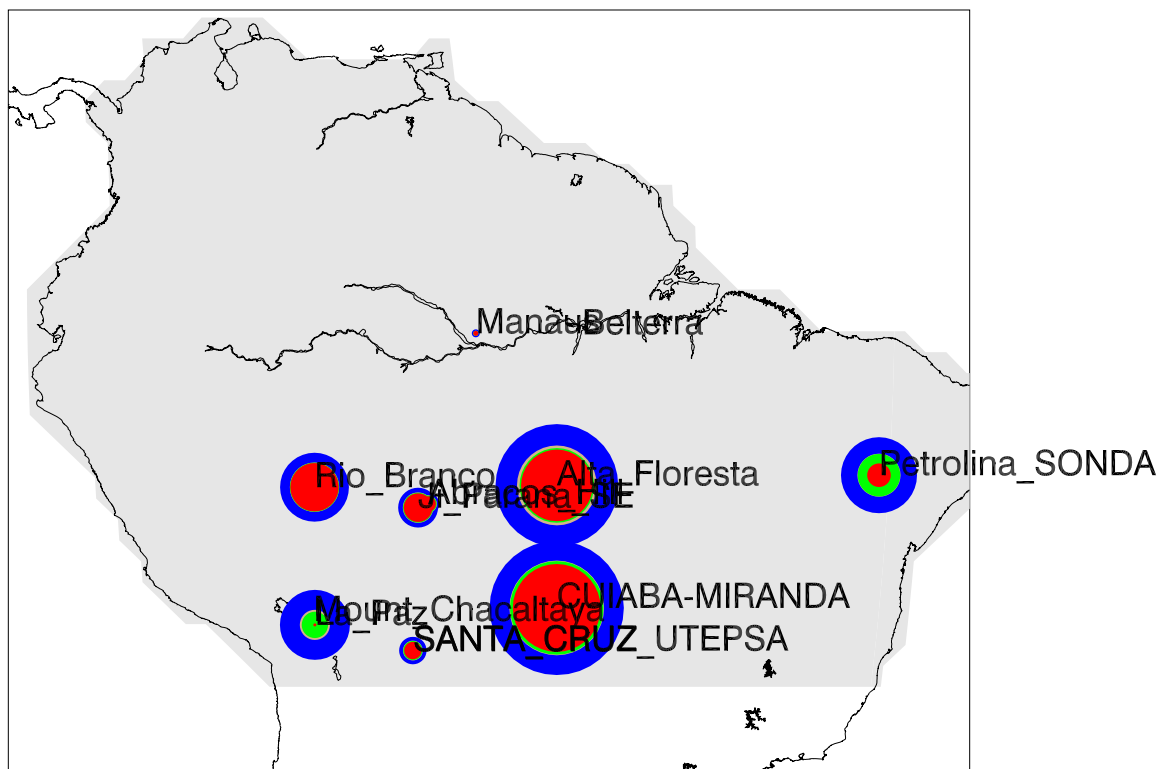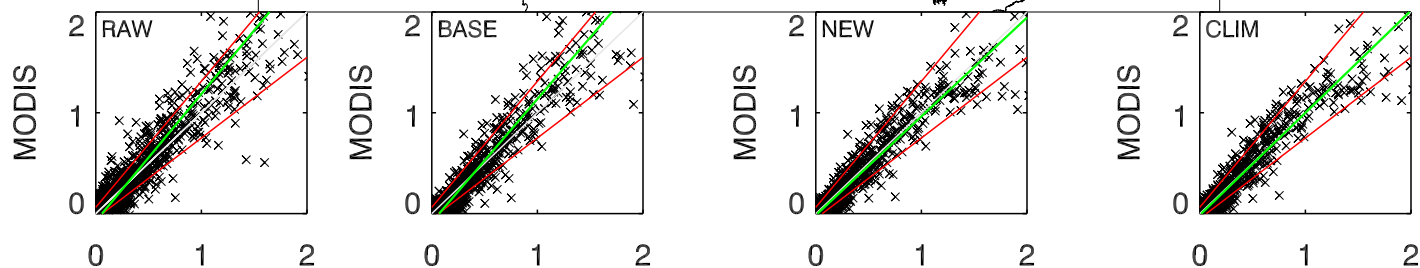

| Which             | AERONET   |           | AERONET       |      |        | AERONET   |          |            | AERONET |                |
|-------------------|-----------|-----------|---------------|------|--------|-----------|----------|------------|---------|----------------|
|                   |           | MODIS AOD | MODIS-AERONET |      |        | % -/in/+  |          | Regression |         |                |
|                   |           |           | Mean          | >0.2 | >1.0   | Mean Bias | RMSE     | Tolerance  | Slope   | r <sup>2</sup> |
| RAW               | (N= 2168) | 0.286     | 0.30          | 0.07 | -0.000 | 0.205     | 25/62/11 | 1.013      | 0.75    |                |
| BASE              | (N= 1400) | 0.309     | 0.30          | 0.09 | -0.014 | 0.212     | 26/65/ 7 | 0.988      | 0.78    |                |
| NEW               | (N= 1350) | 0.284     | 0.32          | 0.08 | -0.022 | 0.149     | 12/81/ 6 | 0.956      | 0.82    |                |
| CLIM              | (N= 1317) | 0.279     | 0.31          | 0.07 | -0.011 | 0.138     | 10/82/ 7 | 0.987      | 0.82    |                |
| AERONET AOD > 0.2 |           |           |               |      |        |           |          |            |         |                |
| RAW               | (N= 698)  | 0.749     | 0.83          | 0.23 | 0.069  | 0.342     | 13/65/20 | 1.007      | 0.72    |                |
| BASE              | (N= 520)  | 0.740     | 0.79          | 0.24 | 0.043  | 0.337     | 19/62/17 | 0.987      | 0.77    |                |
| NEW               | (N= 491)  | 0.644     | 0.83          | 0.22 | -0.022 | 0.238     | 15/71/13 | 0.955      | 0.80    |                |
| CLIM              | (N= 461)  | 0.639     | 0.84          | 0.21 | -0.001 | 0.225     | 13/71/14 | 0.985      | 0.81    |                |

| Which | Noise | vs $\tau_A$ |             |  | vs $\tau_M$ |             | Est.@ | Est.@ | Est.@ | Est.@ | Est.@ |
|-------|-------|-------------|-------------|--|-------------|-------------|-------|-------|-------|-------|-------|
|       | Floor | Diagnostic  |             |  | Prognostic  |             | 0.1   | 0.2   | 0.4   | 0.6   | 1.0   |
| RAW   | 0.079 | 0.00 +      | 0.27 $\tau$ |  | 0.03 +      | 0.17 $\tau$ | 0.08  | 0.08  | 0.10  | 0.13  | 0.20  |
| BASE  | 0.068 | 0.00 +      | 0.27 $\tau$ |  | 0.03 +      | 0.14 $\tau$ | 0.07  | 0.07  | 0.09  | 0.11  | 0.17  |
| NEW   | 0.050 | 0.04 +      | 0.13 $\tau$ |  | 0.02 +      | 0.16 $\tau$ | 0.05  | 0.05  | 0.08  | 0.11  | 0.17  |
| CLIM  | 0.047 | 0.02 +      | 0.20 $\tau$ |  | 0.02 +      | 0.16 $\tau$ | 0.05  | 0.05  | 0.08  | 0.11  | 0.18  |
