# Supplementary material for: An over-land aerosol optical depth data set for data assimilation by filtering, correction, and aggregation of MODIS Collection 5 optical depth retrievals
Source: Copernicus journal article supplement (doi:10.5194/amt-4-379-2011), 2011-03-01
Supplement: Supplementary file 28 [file ps006_s._south_america.pdf › aux_material_lite_rev/l3_region_pages/terra/ps006_s._south_america.pdf]

T 32.50S 64.50W S. South America  
AERONET AOD: N= 2766  $\bar{\tau}$ =0.10 eta=0.52

MODIS  $\tau$

x RAW  
x BASE  
x NEW  
x STRONG

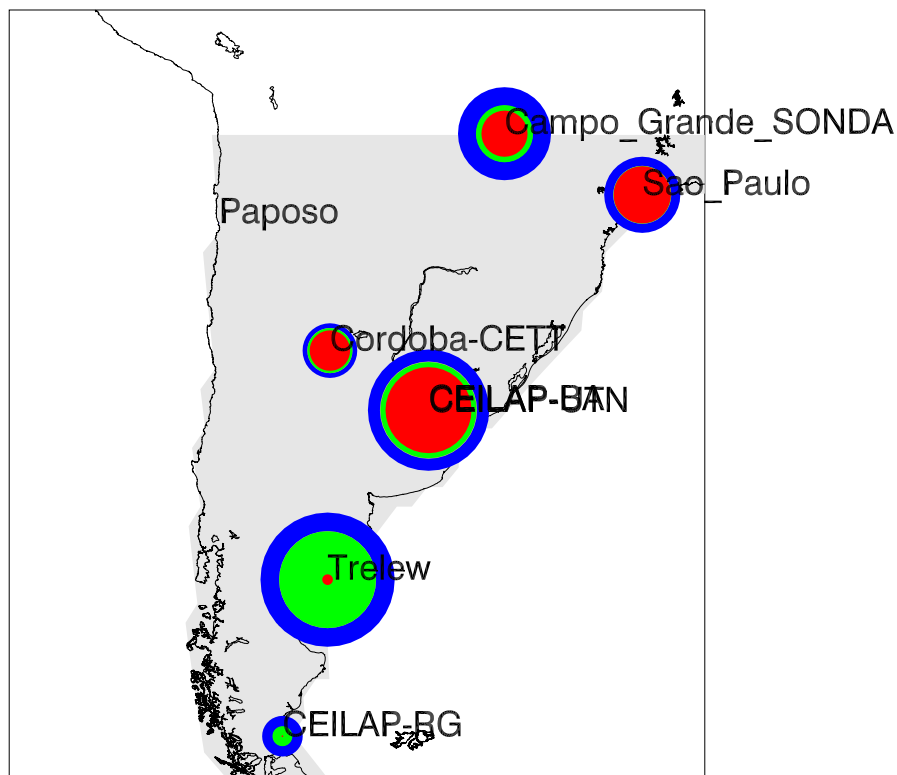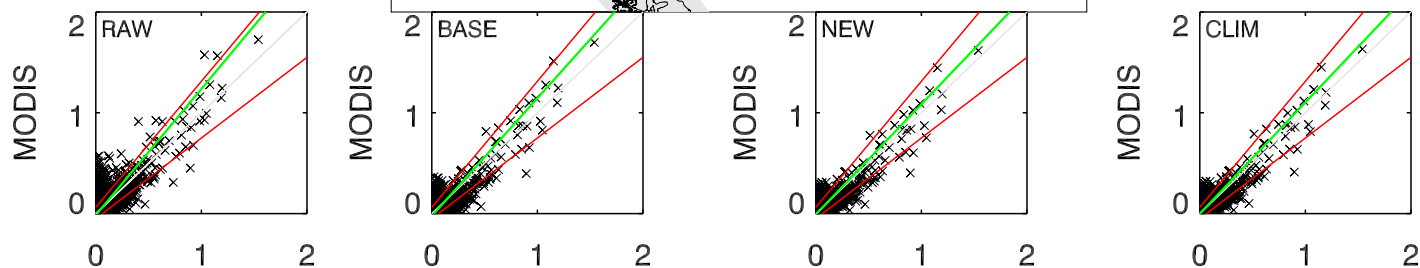

| Which             |           | AERONET AOD |      |      | MODIS-AERONET |       |                    | Regression |                |
|-------------------|-----------|-------------|------|------|---------------|-------|--------------------|------------|----------------|
|                   |           | Mean        | >0.2 | >1.0 | Mean Bias     | RMSE  | % -/in/+ Tolerance | Slope      | r <sup>2</sup> |
| RAW               | (N= 2766) | 0.104       | 0.13 | 0.00 | 0.008         | 0.104 | 15/63/20           | 1.033      | 0.58           |
| BASE              | (N= 1981) | 0.092       | 0.08 | 0.01 | -0.008        | 0.093 | 14/68/16           | 0.945      | 0.72           |
| NEW               | (N= 1981) | 0.100       | 0.08 | 0.01 | 0.000         | 0.077 | 7/79/12            | 0.898      | 0.73           |
| CLIM              | (N= 1959) | 0.110       | 0.08 | 0.01 | 0.009         | 0.079 | 6/77/16            | 0.929      | 0.74           |
| AERONET AOD > 0.2 |           |             |      |      |               |       |                    |            |                |
| RAW               | (N= 271)  | 0.343       | 0.56 | 0.04 | -0.037        | 0.191 | 35/56/ 8           | 0.970      | 0.72           |
| BASE              | (N= 198)  | 0.325       | 0.46 | 0.06 | -0.071        | 0.203 | 47/47/ 4           | 0.921      | 0.78           |
| NEW               | (N= 195)  | 0.335       | 0.56 | 0.05 | -0.064        | 0.183 | 36/58/ 4           | 0.884      | 0.79           |
| CLIM              | (N= 198)  | 0.343       | 0.58 | 0.05 | -0.054        | 0.180 | 32/62/ 5           | 0.912      | 0.81           |

| Which | Noise | vs $\tau_A$ |             | vs $\tau_M$ |              | Est.@ | Est.@ | Est.@ | Est.@ | Est.@ |
|-------|-------|-------------|-------------|-------------|--------------|-------|-------|-------|-------|-------|
|       | Floor | Diagnostic  |             | Prognostic  |              | 0.1   | 0.2   | 0.4   | 0.6   | 1.0   |
| RAW   | 0.089 | 0.02 +      | 0.27 $\tau$ | 0.15 +      | 0.05 $\tau$  | 0.15  | 0.16  | 0.17  | 0.18  | 0.20  |
| BASE  | 0.071 | 0.03 +      | 0.28 $\tau$ | 0.16 +      | -0.03 $\tau$ | 0.16  | 0.15  | 0.15  | 0.14  | 0.13  |
| NEW   | 0.055 | -0.02 +     | 0.38 $\tau$ | 0.11 +      | 0.02 $\tau$  | 0.11  | 0.11  | 0.12  | 0.12  | 0.13  |
| CLIM  | 0.058 | 0.01 +      | 0.27 $\tau$ | 0.11 +      | 0.01 $\tau$  | 0.11  | 0.11  | 0.11  | 0.12  | 0.12  |
