# Supplementary material for: An over-land aerosol optical depth data set for data assimilation by filtering, correction, and aggregation of MODIS Collection 5 optical depth retrievals
Source: Copernicus journal article supplement (doi:10.5194/amt-4-379-2011), 2011-03-01
Supplement: Supplementary file 29 [file ps007_africa_below_equator.pdf › aux_material_lite_rev/l3_region_pages/terra/ps007_africa_below_equator.pdf]

T 17.50S 26.50E Africa below equ  
AERONET AOD: N= 1331  $\bar{\tau}$ =0.16 eta=0.64

MODIS  $\tau$

x RAW  
x BASE  
x NEW  
x STRONG

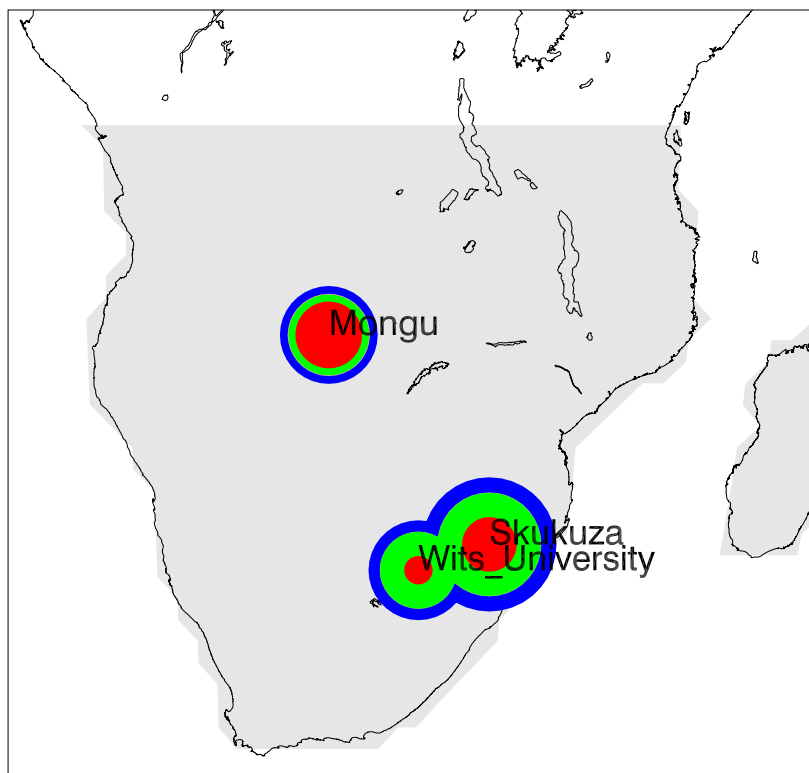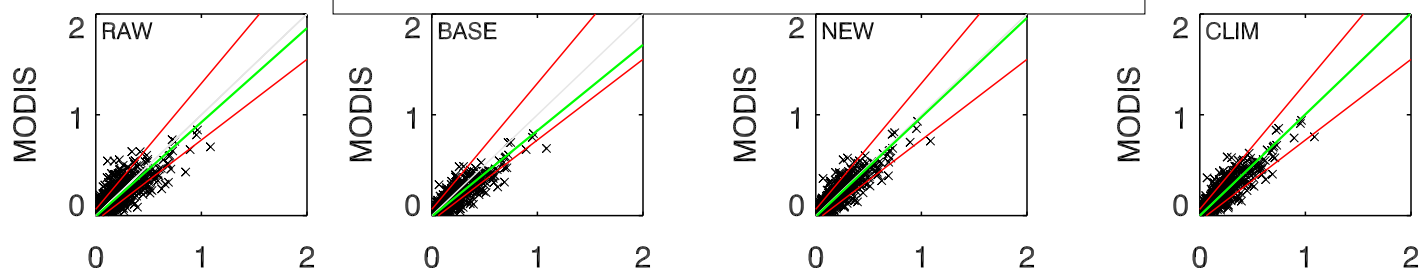

| Which             |           | MODIS AOD |      |      | MODIS-AERONET |       | % -/in/+<br>Tolerance | Regression |                |
|-------------------|-----------|-----------|------|------|---------------|-------|-----------------------|------------|----------------|
|                   |           | Mean      | >0.2 | >1.0 | Mean Bias     | RMSE  |                       | Slope      | r <sup>2</sup> |
| RAW               | (N= 1330) | 0.142     | 0.23 | 0.00 | -0.018        | 0.079 | 12/79/ 7              | 0.884      | 0.41           |
| BASE              | (N= 1057) | 0.130     | 0.19 | 0.00 | -0.033        | 0.071 | 11/85/ 2              | 0.823      | 0.61           |
| NEW               | (N= 1046) | 0.151     | 0.24 | 0.00 | -0.012        | 0.063 | 5/89/ 4               | 0.958      | 0.66           |
| CLIM              | (N= 1038) | 0.163     | 0.28 | 0.00 | -0.000        | 0.061 | 4/88/ 7               | 1.000      | 0.68           |
| AERONET AOD > 0.2 |           |           |      |      |               |       |                       |            |                |
| RAW               | (N= 351)  | 0.279     | 0.69 | 0.00 | -0.055        | 0.118 | 22/72/ 5              | 0.850      | 0.44           |
| BASE              | (N= 285)  | 0.263     | 0.64 | 0.00 | -0.071        | 0.113 | 23/74/ 2              | 0.812      | 0.61           |
| NEW               | (N= 282)  | 0.309     | 0.77 | 0.00 | -0.026        | 0.093 | 11/82/ 5              | 0.941      | 0.66           |
| CLIM              | (N= 282)  | 0.324     | 0.80 | 0.00 | -0.011        | 0.090 | 8/81/ 9               | 0.978      | 0.67           |

| Which | Noise | vs $\tau_A$ |             | vs $\tau_M$ |             | Est.@ | Est.@ | Est.@ | Est.@ | Est.@ |
|-------|-------|-------------|-------------|-------------|-------------|-------|-------|-------|-------|-------|
|       | Floor | Diagnostic  |             | Prognostic  |             | 0.1   | 0.2   | 0.4   | 0.6   | 1.0   |
| RAW   | 0.060 | 0.01 +      | 0.23 $\tau$ | 0.00 +      | 0.28 $\tau$ | 0.06  | 0.06  | 0.12  | 0.17  | 0.29  |
| BASE  | 0.046 | 0.01 +      | 0.23 $\tau$ | 0.02 +      | 0.20 $\tau$ | 0.05  | 0.06  | 0.10  | 0.14  | 0.22  |
| NEW   | 0.047 | 0.02 +      | 0.14 $\tau$ | 0.03 +      | 0.11 $\tau$ | 0.05  | 0.05  | 0.07  | 0.10  | 0.14  |
| CLIM  | 0.046 | 0.03 +      | 0.12 $\tau$ | 0.02 +      | 0.15 $\tau$ | 0.05  | 0.05  | 0.08  | 0.11  | 0.16  |
