# Supplementary material for: An over-land aerosol optical depth data set for data assimilation by filtering, correction, and aggregation of MODIS Collection 5 optical depth retrievals
Source: Copernicus journal article supplement (doi:10.5194/amt-4-379-2011), 2011-03-01
Supplement: Supplementary file 30 [file ps008_equatorial_africa.pdf › aux_material_lite_rev/l3_region_pages/terra/ps008_equatorial_africa.pdf]

# T 0.50N 26.50E Equatorial Africa

AERONET AOD: N= 691  $\bar{\tau}$ =0.19 eta=0.48

MODIS  $\tau$

- x RAW
- x BASE
- x NEW
- x STRONG

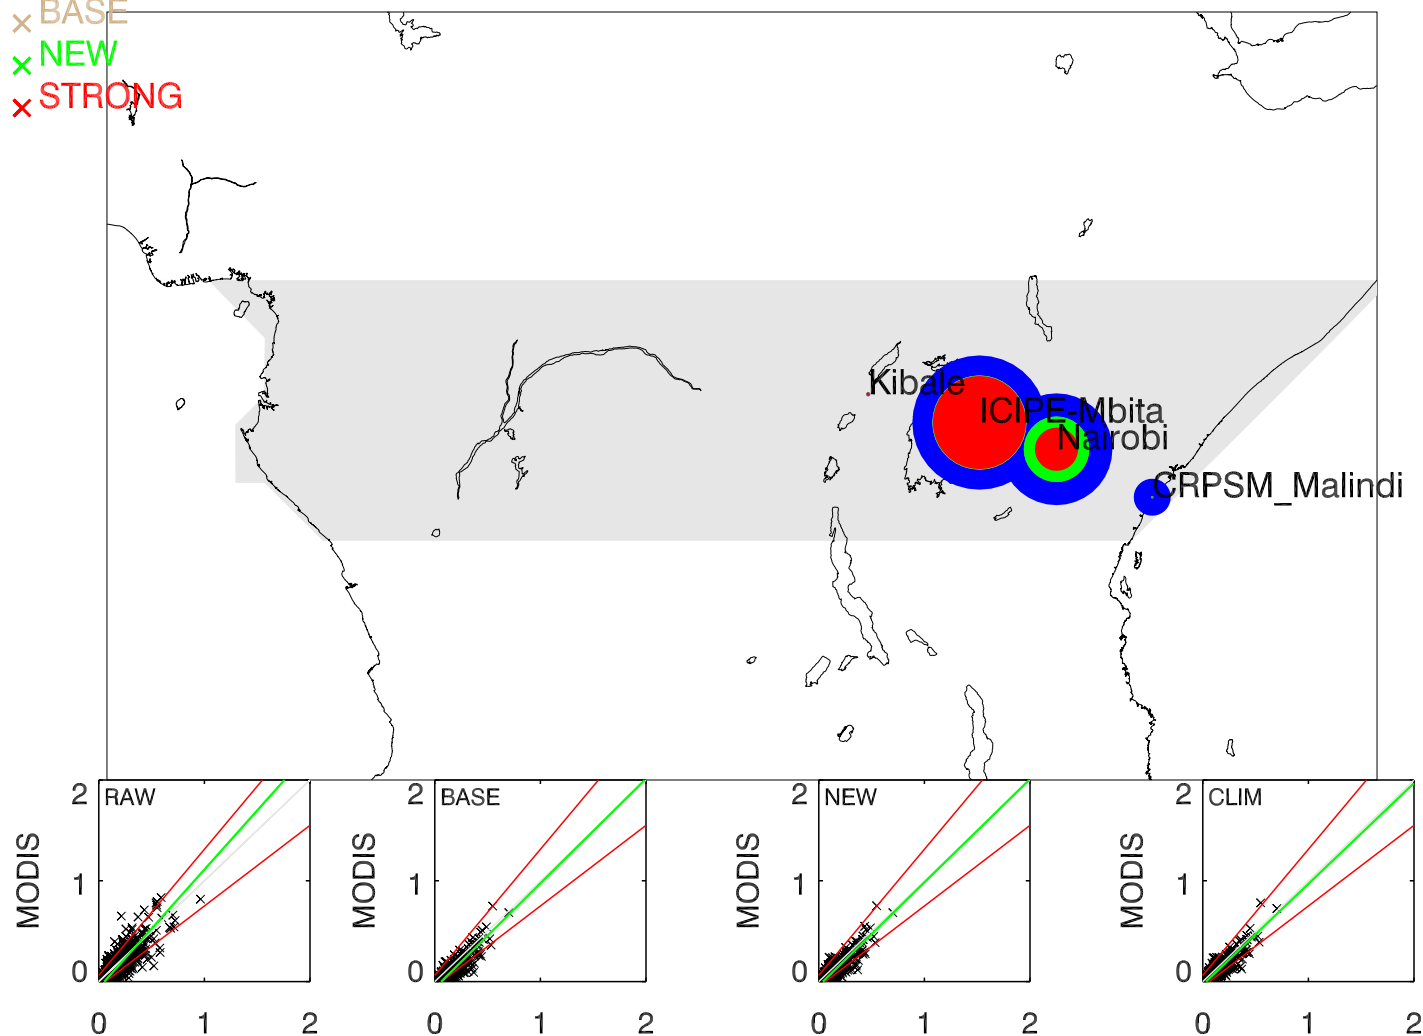

| Which             |          | MODIS AOD |      |      | MODIS-AERONET |       | % -/in/+  |  | Regression |                |
|-------------------|----------|-----------|------|------|---------------|-------|-----------|--|------------|----------------|
|                   |          | Mean      | >0.2 | >1.0 | Mean Bias     | RMSE  | Tolerance |  | Slope      | r <sup>2</sup> |
| RAW               | (N= 691) | 0.166     | 0.32 | 0.00 | -0.027        | 0.087 | 22/68/ 8  |  | 1.001      | 0.46           |
| BASE              | (N= 398) | 0.118     | 0.17 | 0.00 | -0.057        | 0.081 | 29/69/ 1  |  | 0.900      | 0.59           |
| NEW               | (N= 397) | 0.138     | 0.20 | 0.00 | -0.037        | 0.068 | 19/79/ 1  |  | 0.933      | 0.59           |
| CLIM              | (N= 391) | 0.143     | 0.21 | 0.00 | -0.031        | 0.064 | 12/85/ 2  |  | 0.937      | 0.61           |
| AERONET AOD > 0.2 |          |           |      |      |               |       |           |  |            |                |
| RAW               | (N= 256) | 0.285     | 0.71 | 0.00 | -0.028        | 0.112 | 19/70/ 9  |  | 0.980      | 0.43           |
| BASE              | (N= 120) | 0.226     | 0.54 | 0.00 | -0.076        | 0.107 | 31/67/ 0  |  | 0.895      | 0.60           |
| NEW               | (N= 117) | 0.245     | 0.60 | 0.00 | -0.058        | 0.092 | 26/72/ 0  |  | 0.921      | 0.62           |
| CLIM              | (N= 114) | 0.248     | 0.63 | 0.00 | -0.055        | 0.088 | 21/77/ 0  |  | 0.923      | 0.64           |

| Which | Noise | vs $\tau_A$ |             | vs $\tau_M$ |              | Est.@ | Est.@ | Est.@ | Est.@ | Est.@ |
|-------|-------|-------------|-------------|-------------|--------------|-------|-------|-------|-------|-------|
|       | Floor | Diagnostic  |             | Prognostic  |              | 0.1   | 0.2   | 0.4   | 0.6   | 1.0   |
| RAW   | 0.069 | 0.03 +      | 0.17 $\tau$ | -0.00 +     | 0.26 $\tau$  | 0.07  | 0.07  | 0.10  | 0.15  | 0.26  |
| BASE  | 0.067 | 0.03 +      | 0.18 $\tau$ | ***** +     | ***** $\tau$ | 0.07  | 0.07  | 0.07  | 0.07  | 0.07  |
| NEW   | 0.055 | 0.06 +      | 0.05 $\tau$ | ***** +     | ***** $\tau$ | 0.06  | 0.06  | 0.06  | 0.06  | 0.06  |
| CLIM  | 0.050 | 0.03 +      | 0.13 $\tau$ | ***** +     | ***** $\tau$ | 0.05  | 0.05  | 0.05  | 0.05  | 0.05  |
