# Supplementary material for: An over-land aerosol optical depth data set for data assimilation by filtering, correction, and aggregation of MODIS Collection 5 optical depth retrievals
Source: Copernicus journal article supplement (doi:10.5194/amt-4-379-2011), 2011-03-01
Supplement: Supplementary file 31 [file ps009_africa_above_equator.pdf › aux_material_lite_rev/l3_region_pages/terra/ps009_africa_above_equator.pdf]

T 18.50N 11.50E Africa above equ

AERONET AOD: N= 6829  $\overline{\tau}$ =0.39 eta=0.36

MODIS  $\tau$

x RAW  
x BASE  
x NEW  
x STRONG

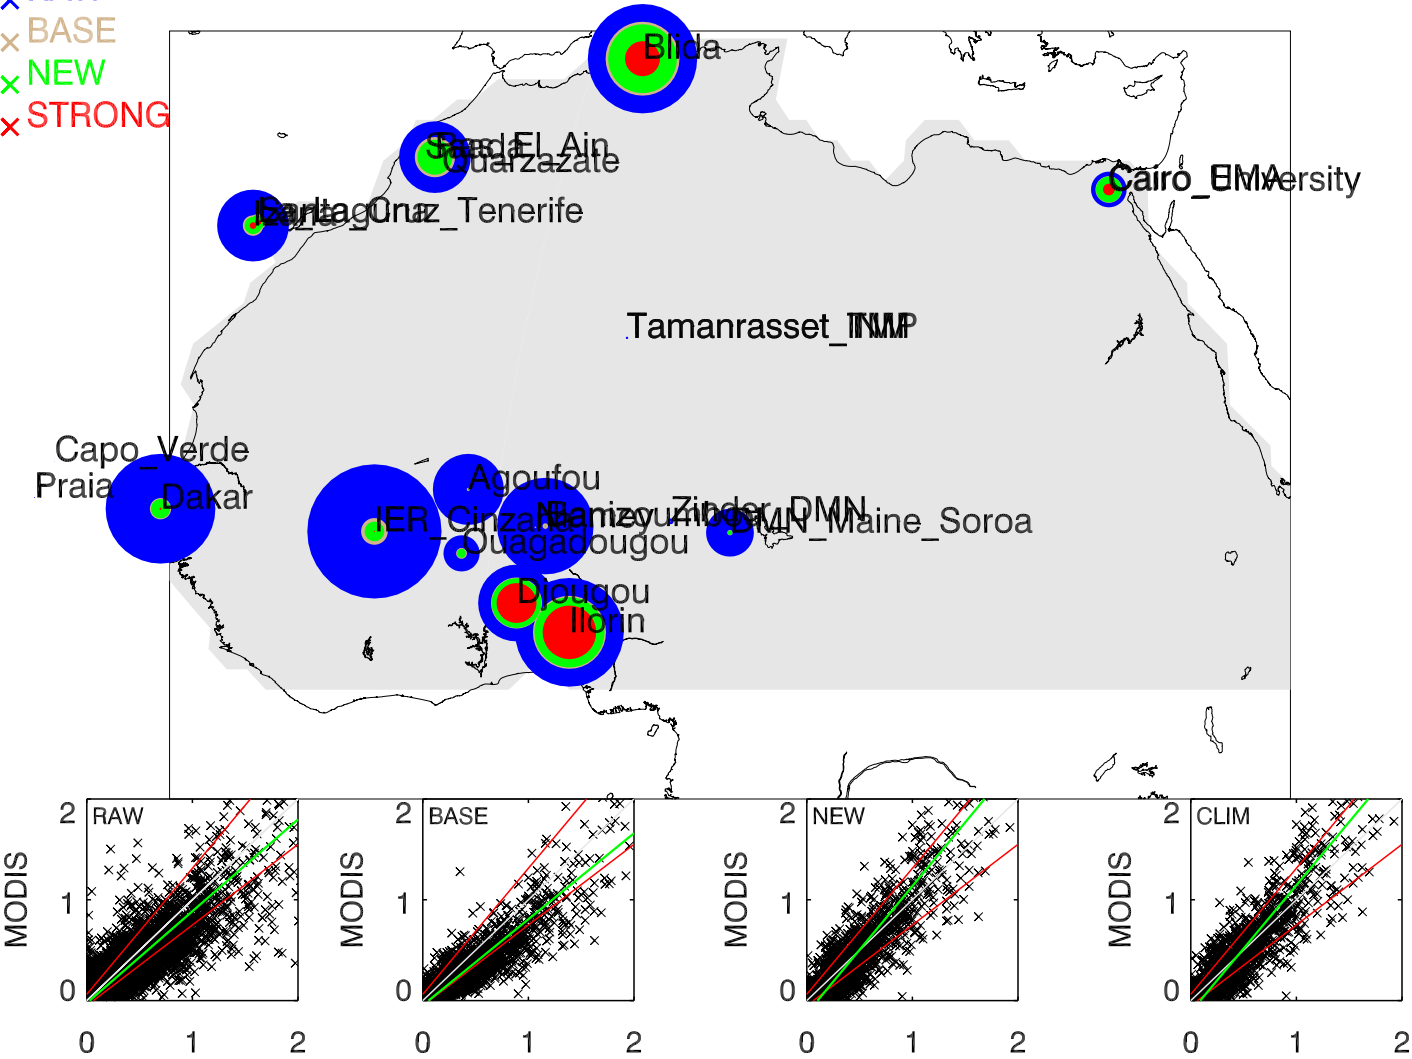

| AERONET           |           |             | AERONET       |             |             | AERONET  |           |       | AERONET    |                |
|-------------------|-----------|-------------|---------------|-------------|-------------|----------|-----------|-------|------------|----------------|
| Which             |           | MODIS AOD   | MODIS-AERONET |             |             | % -/in/+ |           |       | Regression |                |
|                   |           | Mean        | >0.2          | >1.0        | Mean Bias   | RMSE     | Tolerance |       | Slope      | r <sup>2</sup> |
| RAW               | (N= 6826) | 0.329       | 0.60          | 0.03        | -0.060      | 0.208    | 30/54/14  |       | 0.773      | 0.52           |
| BASE              | (N= 2462) | 0.294       | 0.51          | 0.03        | -0.105      | 0.192    | 40/52/ 7  |       | 0.723      | 0.64           |
| NEW               | (N= 2182) | 0.383       | 0.51          | 0.08        | -0.022      | 0.205    | 30/54/14  |       | 0.960      | 0.60           |
| CLIM              | (N= 2076) | 0.400       | 0.55          | 0.08        | -0.008      | 0.203    | 24/58/16  |       | 0.967      | 0.60           |
| AERONET AOD > 0.2 |           |             |               |             |             |          |           |       |            |                |
| RAW               | (N= 4678) | 0.417       | 0.79          | 0.05        | -0.103      | 0.237    | 38/53/ 7  |       | 0.767      | 0.52           |
| BASE              | (N= 1659) | 0.389       | 0.73          | 0.05        | -0.151      | 0.227    | 51/45/ 3  |       | 0.721      | 0.65           |
| NEW               | (N= 1452) | 0.531       | 0.74          | 0.12        | -0.023      | 0.243    | 31/53/14  |       | 0.956      | 0.60           |
| CLIM              | (N= 1375) | 0.555       | 0.78          | 0.12        | -0.006      | 0.240    | 26/56/16  |       | 0.963      | 0.60           |
|                   |           |             |               |             |             |          |           |       |            |                |
|                   | Noise     | vs $\tau_A$ |               | vs $\tau_M$ |             | Est.@    | Est.@     | Est.@ | Est.@      | Est.@          |
| Which             | Floor     | Diagnostic  |               | Prognostic  |             | 0.1      | 0.2       | 0.4   | 0.6        | 1.0            |
| RAW               | 0.119     | 0.03 +      | 0.25 $\tau$   | 0.08 +      | 0.20 $\tau$ | 0.12     | 0.12      | 0.15  | 0.19       | 0.27           |
| BASE              | 0.077     | 0.03 +      | 0.28 $\tau$   | 0.11 +      | 0.14 $\tau$ | 0.13     | 0.14      | 0.17  | 0.20       | 0.26           |
| NEW               | 0.092     | 0.07 +      | 0.17 $\tau$   | 0.05 +      | 0.15 $\tau$ | 0.09     | 0.09      | 0.11  | 0.14       | 0.20           |
| CLIM              | 0.091     | 0.06 +      | 0.19 $\tau$   | 0.06 +      | 0.14 $\tau$ | 0.09     | 0.09      | 0.11  | 0.14       | 0.20           |
