# Supplementary material for: An over-land aerosol optical depth data set for data assimilation by filtering, correction, and aggregation of MODIS Collection 5 optical depth retrievals
Source: Copernicus journal article supplement (doi:10.5194/amt-4-379-2011), 2011-03-01
Supplement: Supplementary file 32 [file ps010_sw_asia.pdf › aux_material_lite_rev/l3_region_pages/terra/ps010_sw_asia.pdf]

T 33.50N 50.50E SW Asia  
AERONET AOD: N= 79  $\overline{\tau}$ =0.28 eta=0.37

MODIS  $\tau$

- x RAW
- x BASE
- x NEW
- x STRONG

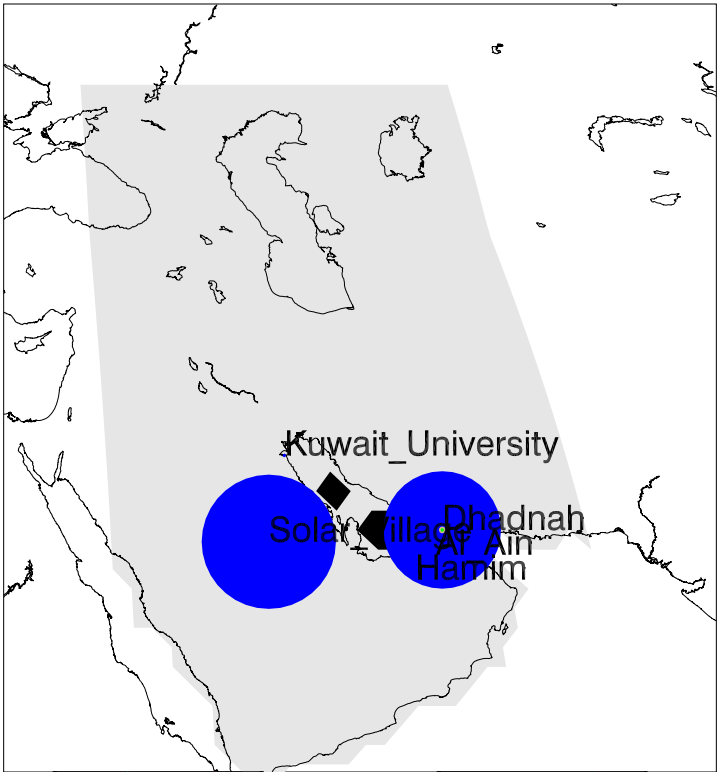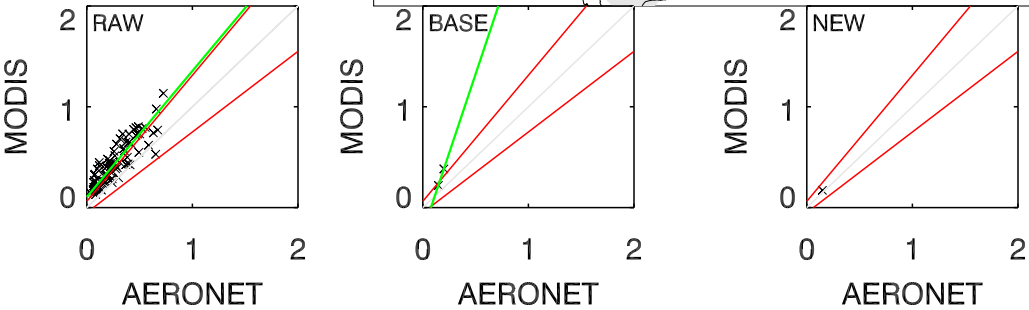

| Which | MODIS AOD |       |      |      | MODIS-AERONET |       | % -/in/+ | Regression |                |
|-------|-----------|-------|------|------|---------------|-------|----------|------------|----------------|
|       | (N=       | Mean  | >0.2 | >1.0 | Mean Bias     | RMSE  |          | Slope      | r <sup>2</sup> |
| RAW   | (N= 79)   | 0.450 | 0.87 | 0.01 | 0.174         | 0.203 | 0/24/75  | 1.478      | 0.72           |
| BASE  | (N= 2)    | 0.302 | 1.00 | 0.00 | 0.128         | 0.139 | 0/50/50  | -999.000   | *****          |
| NEW   | (N= 1)    | 0.171 | 0.00 | 0.00 | 0.024         | 0.024 | 0/**/ 0  | -999.000   | *****          |

|                   |         |       |      |      |       |       |         |       |      |
|-------------------|---------|-------|------|------|-------|-------|---------|-------|------|
| AERONET AOD > 0.2 |         |       |      |      |       |       |         |       |      |
| RAW               | (N= 47) | 0.572 | 1.00 | 0.02 | 0.187 | 0.222 | 0/29/70 | 1.438 | 0.61 |

| Which | Noise | vs $\tau_A$          |  | vs $\tau_M$          |  | Est.@ | Est.@ | Est.@ | Est.@ | Est.@ |
|-------|-------|----------------------|--|----------------------|--|-------|-------|-------|-------|-------|
|       | Floor | Diagnostic           |  | Prognostic           |  | 0.1   | 0.2   | 0.4   | 0.6   | 1.0   |
| RAW   | 0.173 | ***** + ***** $\tau$ |  | ***** + ***** $\tau$ |  | 0.17  | 0.17  | 0.17  | 0.17  | 0.17  |
| BASE  | 0.139 | ***** + ***** $\tau$ |  | ***** + ***** $\tau$ |  | 0.14  | 0.14  | 0.14  | 0.14  | 0.14  |
| NEW   | 0.024 | ***** + ***** $\tau$ |  | ***** + ***** $\tau$ |  | 0.02  | 0.02  | 0.02  | 0.02  | 0.02  |
