# Supplementary material for: An over-land aerosol optical depth data set for data assimilation by filtering, correction, and aggregation of MODIS Collection 5 optical depth retrievals
Source: Copernicus journal article supplement (doi:10.5194/amt-4-379-2011), 2011-03-01
Supplement: Supplementary file 33 [file ps011_europe_-_mediterranean.pdf › aux_material_lite_rev/l3_region_pages/terra/ps011_europe_-_mediterranean.pdf]

T

42.50N 18.50E Europe – Mediter

AERONET AOD: N= 18598  $\bar{\tau}$ =0.17 eta=0.61

MODIS  $\tau$

- RAW
- BASE
- NEW
- STRONG

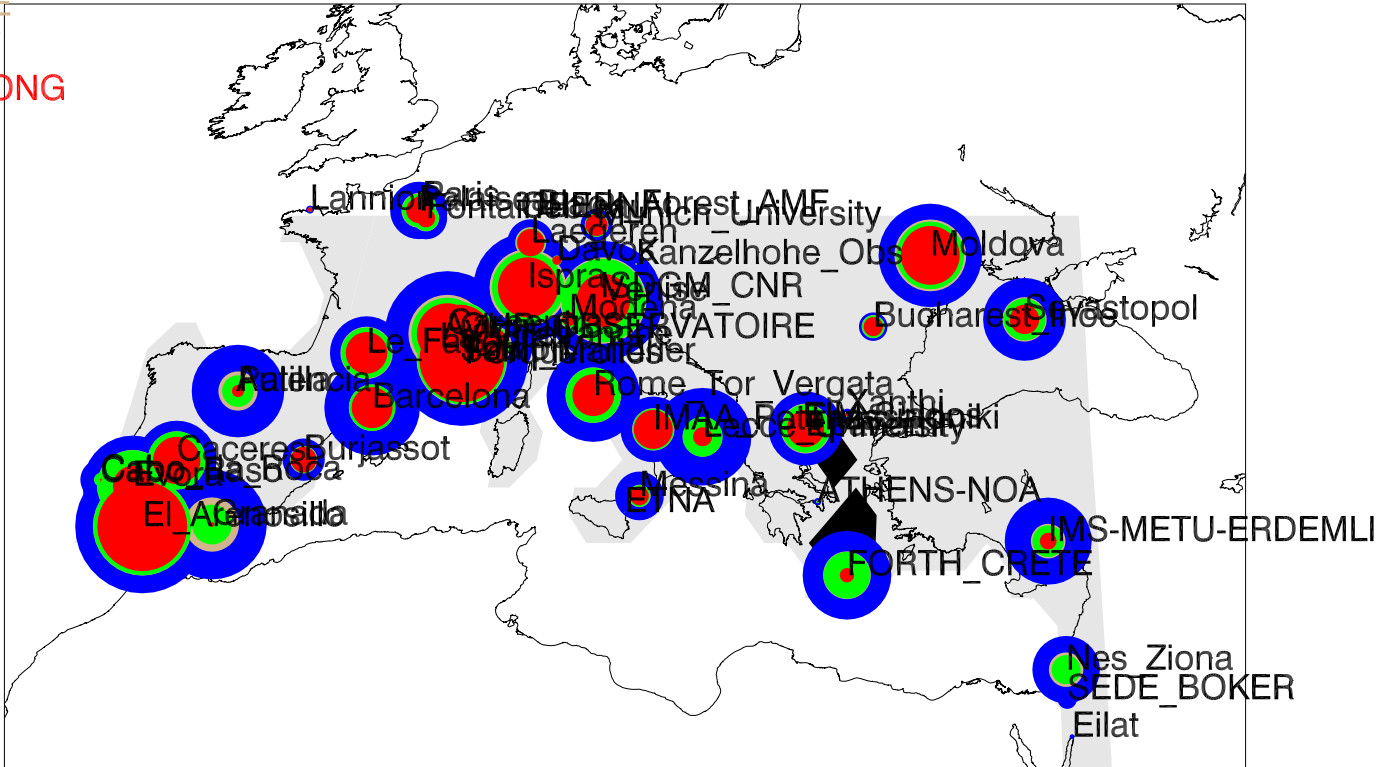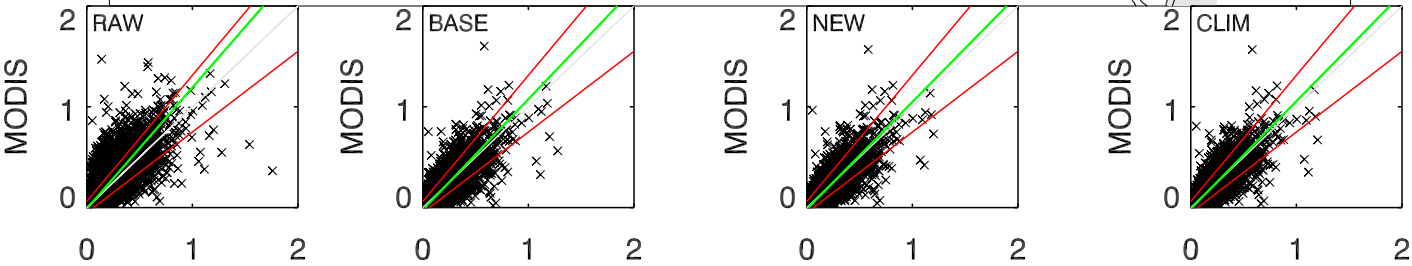

| AERONET           |            | AERONET     |               |             | AERONET     |          |           | AERONET    |                |       |
|-------------------|------------|-------------|---------------|-------------|-------------|----------|-----------|------------|----------------|-------|
| Which             |            | MODIS AOD   | MODIS-AERONET |             |             | % -/in/+ |           | Regression |                |       |
|                   |            | Mean        | >0.2          | >1.0        | Mean Bias   | RMSE     | Tolerance | Slope      | r <sup>2</sup> |       |
| RAW               | (N= 18592) | 0.187       | 0.37          | 0.00        | 0.021       | 0.101    | 7/72/19   | 1.127      | 0.37           |       |
| BASE              | (N= 11081) | 0.157       | 0.28          | 0.00        | -0.007      | 0.079    | 9/80/ 9   | 1.027      | 0.47           |       |
| NEW               | (N= 10564) | 0.159       | 0.27          | 0.00        | -0.005      | 0.074    | 7/84/ 7   | 1.013      | 0.48           |       |
| CLIM              | (N= 10472) | 0.164       | 0.29          | 0.00        | -0.001      | 0.073    | 6/85/ 8   | 1.024      | 0.48           |       |
| AERONET AOD > 0.2 |            |             |               |             |             |          |           |            |                |       |
| RAW               | (N= 5326)  | 0.332       | 0.82          | 0.01        | 0.012       | 0.134    | 12/70/17  | 1.059      | 0.36           |       |
| BASE              | (N= 3160)  | 0.296       | 0.74          | 0.00        | -0.020      | 0.116    | 17/73/ 9  | 0.992      | 0.45           |       |
| NEW               | (N= 3019)  | 0.295       | 0.75          | 0.00        | -0.021      | 0.112    | 14/76/ 9  | 0.984      | 0.47           |       |
| CLIM              | (N= 3029)  | 0.301       | 0.77          | 0.00        | -0.014      | 0.109    | 12/77/ 9  | 0.993      | 0.47           |       |
|                   |            |             |               |             |             |          |           |            |                |       |
|                   | Noise      | vs $\tau_A$ |               | vs $\tau_M$ |             | Est.@    | Est.@     | Est.@      | Est.@          | Est.@ |
| Which             | Floor      | Diagnostic  |               | Prognostic  |             | 0.1      | 0.2       | 0.4        | 0.6            | 1.0   |
| RAW               | 0.084      | 0.02 +      | 0.23 $\tau$   | -0.02 +     | 0.37 $\tau$ | 0.08     | 0.08      | 0.13       | 0.20           | 0.35  |
| BASE              | 0.058      | 0.01 +      | 0.24 $\tau$   | -0.00 +     | 0.26 $\tau$ | 0.06     | 0.06      | 0.10       | 0.15           | 0.26  |
| NEW               | 0.051      | -0.00 +     | 0.26 $\tau$   | -0.01 +     | 0.28 $\tau$ | 0.05     | 0.05      | 0.10       | 0.15           | 0.26  |
| CLIM              | 0.052      | 0.00 +      | 0.25 $\tau$   | -0.01 +     | 0.26 $\tau$ | 0.05     | 0.05      | 0.10       | 0.15           | 0.26  |
