# Supplementary material for: An over-land aerosol optical depth data set for data assimilation by filtering, correction, and aggregation of MODIS Collection 5 optical depth retrievals
Source: Copernicus journal article supplement (doi:10.5194/amt-4-379-2011), 2011-03-01
Supplement: Supplementary file 34 [file ps012_eurasian_boreal.pdf › aux_material_lite_rev/l3_region_pages/terra/ps012_eurasian_boreal.pdf]

# T 61.50N 88.50E Eurasian Boreal

## AERONET AOD: N= 6651 $\bar{\tau}$ =0.18 eta=0.63

MODIS  $\tau$

x RAW  
x BASE  
x NEW  
x STRONG

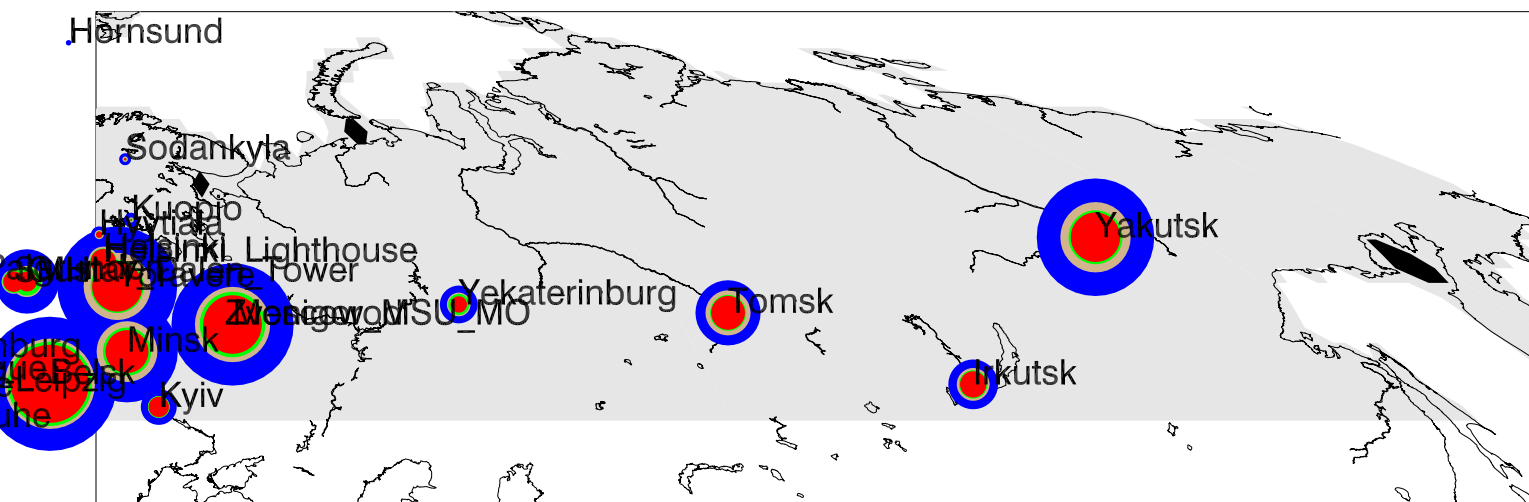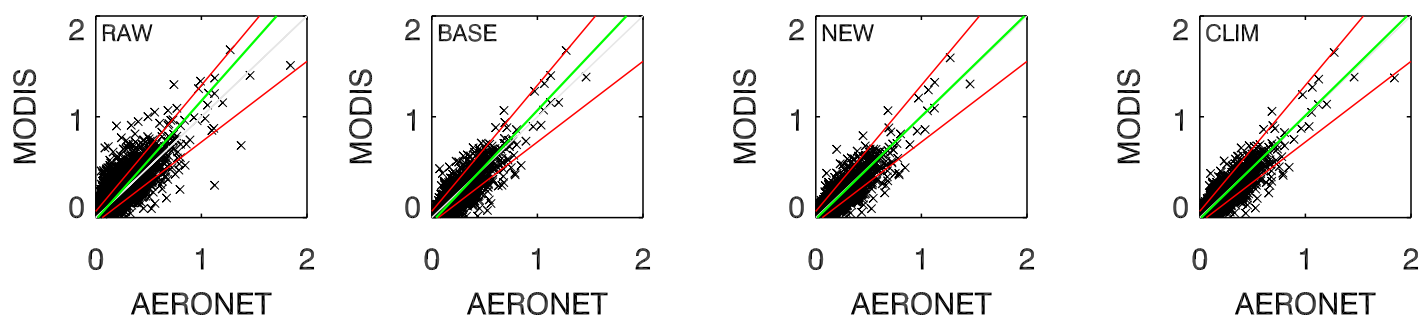

| Which             | AERONET   | MODIS AOD |      |      | MODIS-AERONET |       | % -/in/+<br>Tolerance | Regression |                |
|-------------------|-----------|-----------|------|------|---------------|-------|-----------------------|------------|----------------|
|                   |           | Mean      | >0.2 | >1.0 | Mean Bias     | RMSE  |                       | Slope      | r <sup>2</sup> |
| RAW               | (N= 6650) | 0.186     | 0.35 | 0.00 | 0.009         | 0.092 | 7/76/15               | 1.087      | 0.48           |
| BASE              | (N= 4054) | 0.161     | 0.28 | 0.00 | -0.025        | 0.074 | 11/84/ 3              | 0.984      | 0.63           |
| NEW               | (N= 3637) | 0.174     | 0.30 | 0.00 | -0.011        | 0.067 | 6/89/ 4               | 0.966      | 0.63           |
| CLIM              | (N= 3732) | 0.178     | 0.31 | 0.00 | -0.009        | 0.066 | 5/89/ 4               | 0.977      | 0.69           |
| AERONET AOD > 0.2 |           |           |      |      |               |       |                       |            |                |
| RAW               | (N= 2033) | 0.337     | 0.82 | 0.01 | 0.006         | 0.121 | 10/75/14              | 1.041      | 0.51           |
| BASE              | (N= 1376) | 0.299     | 0.73 | 0.01 | -0.030        | 0.103 | 15/78/ 5              | 0.971      | 0.65           |
| NEW               | (N= 1242) | 0.298     | 0.76 | 0.01 | -0.029        | 0.096 | 13/81/ 4              | 0.951      | 0.64           |
| CLIM              | (N= 1272) | 0.306     | 0.77 | 0.01 | -0.025        | 0.095 | 13/82/ 4              | 0.962      | 0.70           |

| Which | Noise | vs $\tau_A$ |               | vs $\tau_M$ |               | Est.@ | Est.@ | Est.@ | Est.@ | Est.@ |
|-------|-------|-------------|---------------|-------------|---------------|-------|-------|-------|-------|-------|
|       | Floor | Diagnostic  |               | Prognostic  |               | 0.1   | 0.2   | 0.4   | 0.6   | 1.0   |
| RAW   | 0.076 | 0.02        | + 0.21 $\tau$ | 0.01        | + 0.26 $\tau$ | 0.08  | 0.08  | 0.11  | 0.16  | 0.27  |
| BASE  | 0.053 | 0.03        | + 0.14 $\tau$ | 0.02        | + 0.13 $\tau$ | 0.05  | 0.05  | 0.08  | 0.10  | 0.15  |
| NEW   | 0.045 | 0.01        | + 0.19 $\tau$ | 0.02        | + 0.15 $\tau$ | 0.04  | 0.05  | 0.08  | 0.10  | 0.16  |
| CLIM  | 0.043 | 0.01        | + 0.17 $\tau$ | 0.01        | + 0.15 $\tau$ | 0.04  | 0.04  | 0.07  | 0.10  | 0.16  |
