# Supplementary material for: An over-land aerosol optical depth data set for data assimilation by filtering, correction, and aggregation of MODIS Collection 5 optical depth retrievals
Source: Copernicus journal article supplement (doi:10.5194/amt-4-379-2011), 2011-03-01
Supplement: Supplementary file 35 [file ps013_east_asia_mid-latitudes.pdf › aux_material_lite_rev/l3_region_pages/terra/ps013_east_asia_mid-latitudes.pdf]

T

38.50N 103.50E East Asia Mid-L

AERONET AOD: N= 5386  $\overline{\tau}$ =0.43 eta=0.60

MODIS  $\tau$

- x

RAW
- x

BASE
- x

NEW
- x

STRONG

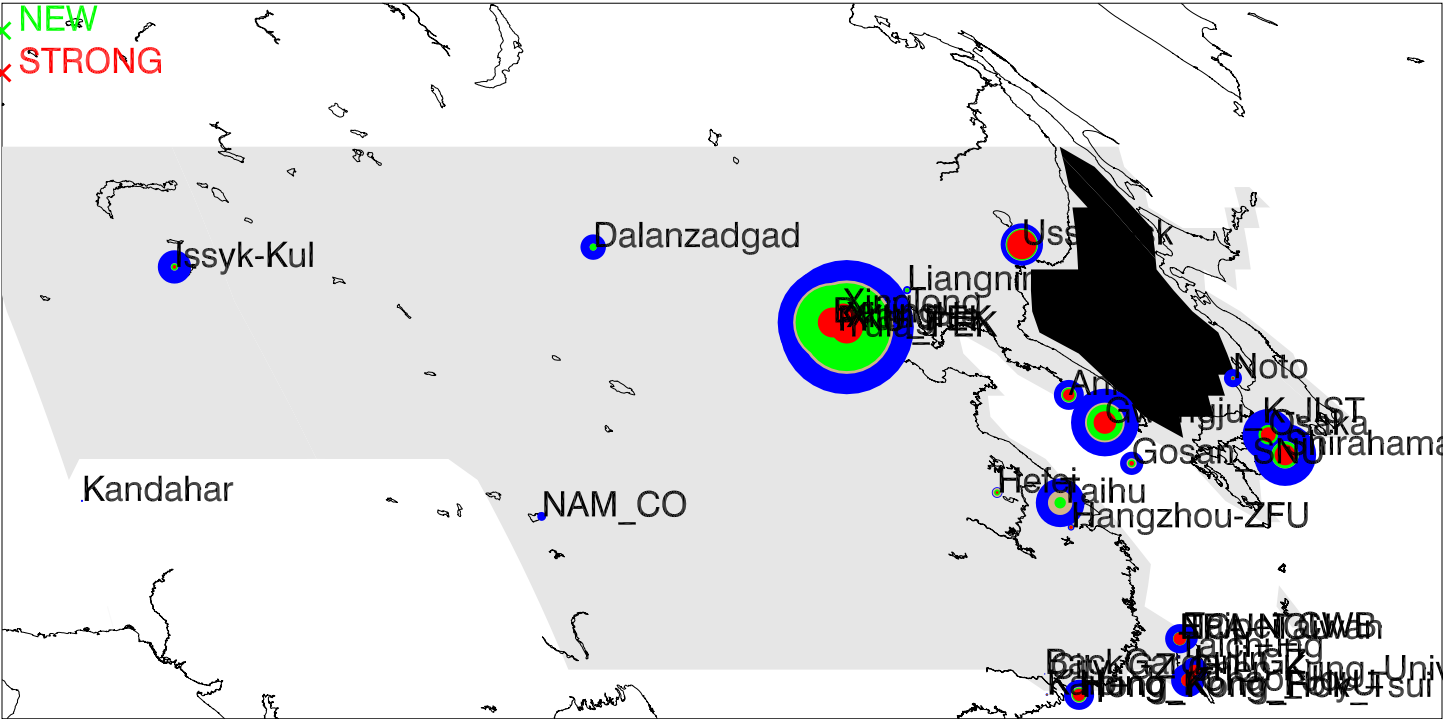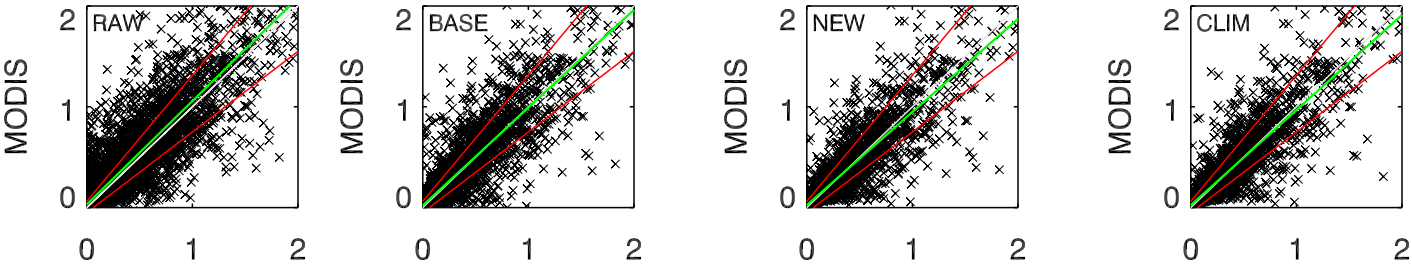

| AERONET           |           |             | AERONET       |             |             | AERONET  |           |       | AERONET    |                |
|-------------------|-----------|-------------|---------------|-------------|-------------|----------|-----------|-------|------------|----------------|
| Which             |           | MODIS AOD   | MODIS-AERONET |             |             | % -/in/+ |           |       | Regression |                |
|                   |           | Mean        | >0.2          | >1.0        | Mean Bias   | RMSE     | Tolerance |       | Slope      | r <sup>2</sup> |
| RAW               | (N= 5385) | 0.475       | 0.70          | 0.11        | 0.042       | 0.251    | 11/59/28  |       | 0.971      | 0.51           |
| BASE              | (N= 2842) | 0.464       | 0.65          | 0.11        | 0.008       | 0.248    | 15/63/21  |       | 0.932      | 0.50           |
| NEW               | (N= 2604) | 0.431       | 0.62          | 0.09        | -0.009      | 0.235    | 13/69/16  |       | 0.890      | 0.50           |
| CLIM              | (N= 2476) | 0.435       | 0.63          | 0.09        | -0.000      | 0.223    | 12/70/17  |       | 0.926      | 0.54           |
| AERONET AOD > 0.2 |           |             |               |             |             |          |           |       |            |                |
| RAW               | (N= 3447) | 0.636       | 0.91          | 0.16        | 0.023       | 0.290    | 16/60/23  |       | 0.958      | 0.48           |
| BASE              | (N= 1917) | 0.616       | 0.87          | 0.16        | -0.004      | 0.289    | 19/59/20  |       | 0.926      | 0.48           |
| NEW               | (N= 1714) | 0.582       | 0.86          | 0.14        | -0.027      | 0.283    | 19/63/17  |       | 0.885      | 0.47           |
| CLIM              | (N= 1623) | 0.587       | 0.87          | 0.14        | -0.018      | 0.266    | 17/65/16  |       | 0.920      | 0.52           |
|                   | Noise     | vs $\tau_A$ |               | vs $\tau_M$ |             | Est.@    | Est.@     | Est.@ | Est.@      | Est.@          |
| Which             | Floor     | Diagnostic  |               | Prognostic  |             | 0.1      | 0.2       | 0.4   | 0.6        | 1.0            |
| RAW               | 0.159     | 0.05 +      | 0.22 $\tau$   | 0.04 +      | 0.24 $\tau$ | 0.16     | 0.16      | 0.16  | 0.18       | 0.28           |
| BASE              | 0.129     | 0.05 +      | 0.21 $\tau$   | 0.02 +      | 0.25 $\tau$ | 0.13     | 0.13      | 0.13  | 0.17       | 0.27           |
| NEW               | 0.087     | 0.04 +      | 0.22 $\tau$   | 0.02 +      | 0.24 $\tau$ | 0.09     | 0.09      | 0.12  | 0.17       | 0.27           |
| CLIM              | 0.097     | 0.04 +      | 0.21 $\tau$   | 0.02 +      | 0.22 $\tau$ | 0.10     | 0.10      | 0.11  | 0.16       | 0.25           |
