# Supplementary material for: An over-land aerosol optical depth data set for data assimilation by filtering, correction, and aggregation of MODIS Collection 5 optical depth retrievals
Source: Copernicus journal article supplement (doi:10.5194/amt-4-379-2011), 2011-03-01
Supplement: Supplementary file 36 [file ps014_peninsular_southeast_asia.pdf › aux_material_lite_rev/l3_region_pages/terra/ps014_peninsular_southeast_asia.pdf]

T

17.50N 102.00E Peninsular Sout

AERONET AOD: N= 1780  $\overline{\tau}$ =0.42 eta=0.66

MODIS  $\tau$

- RAW
- BASE
- NEW
- STRONG

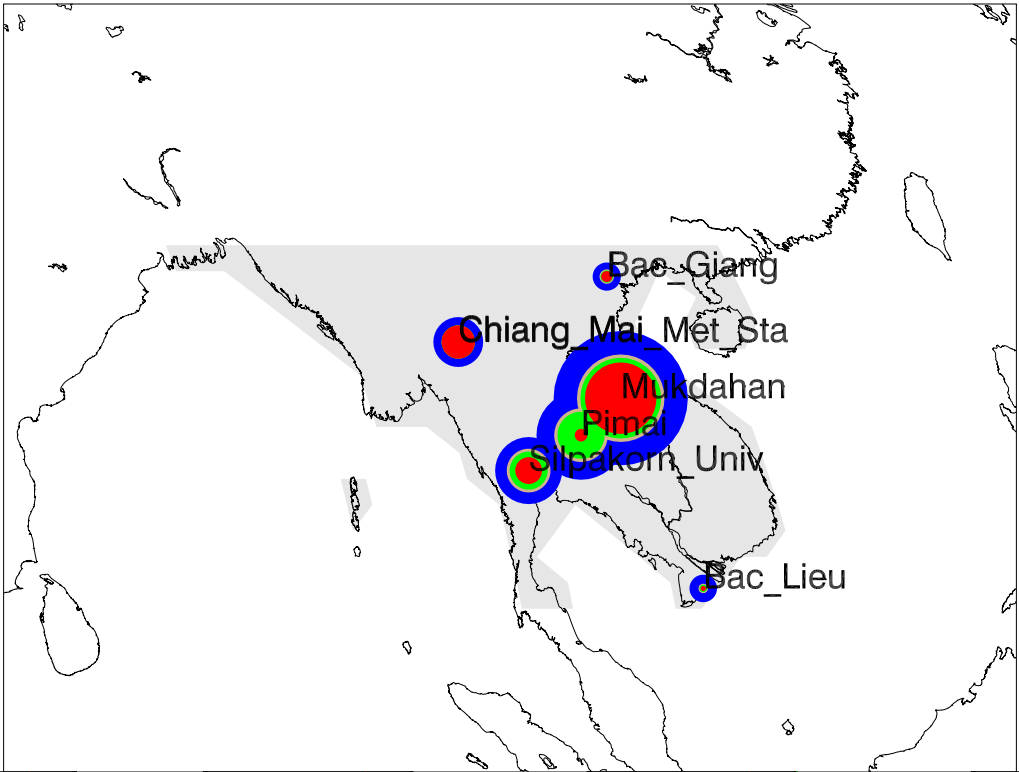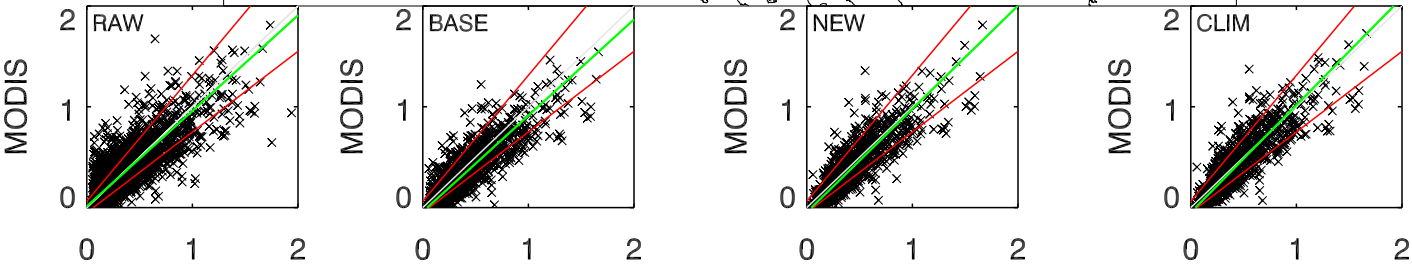

| AERONET           |           | AERONET     |               |             | AERONET     |          |           | AERONET    |                |       |
|-------------------|-----------|-------------|---------------|-------------|-------------|----------|-----------|------------|----------------|-------|
| Which             |           | MODIS AOD   | MODIS-AERONET |             |             | % -/in/+ |           | Regression |                |       |
|                   |           | Mean        | >0.2          | >1.0        | Mean Bias   | RMSE     | Tolerance | Slope      | r <sup>2</sup> |       |
| RAW               | (N= 1780) | 0.410       | 0.75          | 0.04        | -0.009      | 0.196    | 23/53/22  | 0.907      | 0.49           |       |
| BASE              | (N= 1086) | 0.375       | 0.68          | 0.03        | -0.061      | 0.164    | 30/59/ 9  | 0.868      | 0.62           |       |
| NEW               | (N= 985)  | 0.400       | 0.69          | 0.04        | -0.035      | 0.153    | 25/63/11  | 0.927      | 0.61           |       |
| CLIM              | (N= 1003) | 0.421       | 0.70          | 0.05        | -0.020      | 0.152    | 22/65/11  | 0.963      | 0.61           |       |
| AERONET AOD > 0.2 |           |             |               |             |             |          |           |            |                |       |
| RAW               | (N= 1318) | 0.482       | 0.86          | 0.06        | -0.037      | 0.203    | 26/58/15  | 0.893      | 0.49           |       |
| BASE              | (N= 859)  | 0.444       | 0.81          | 0.03        | -0.070      | 0.176    | 29/61/ 8  | 0.865      | 0.61           |       |
| NEW               | (N= 789)  | 0.474       | 0.84          | 0.05        | -0.034      | 0.166    | 22/64/12  | 0.925      | 0.60           |       |
| CLIM              | (N= 807)  | 0.498       | 0.85          | 0.06        | -0.016      | 0.165    | 21/65/13  | 0.962      | 0.60           |       |
|                   |           |             |               |             |             |          |           |            |                |       |
|                   | Noise     | vs $\tau_A$ |               | vs $\tau_M$ |             | Est.@    | Est.@     | Est.@      | Est.@          | Est.@ |
| Which             | Floor     | Diagnostic  |               | Prognostic  |             | 0.1      | 0.2       | 0.4        | 0.6            | 1.0   |
| RAW               | 0.173     | 0.07 +      | 0.15 $\tau$   | 0.07 +      | 0.19 $\tau$ | 0.17     | 0.17      | 0.17       | 0.18           | 0.25  |
| BASE              | 0.105     | 0.06 +      | 0.15 $\tau$   | 0.06 +      | 0.14 $\tau$ | 0.11     | 0.11      | 0.12       | 0.15           | 0.20  |
| NEW               | 0.078     | 0.06 +      | 0.13 $\tau$   | 0.02 +      | 0.21 $\tau$ | 0.08     | 0.08      | 0.10       | 0.14           | 0.23  |
| CLIM              | 0.078     | 0.07 +      | 0.11 $\tau$   | 0.02 +      | 0.19 $\tau$ | 0.08     | 0.08      | 0.10       | 0.13           | 0.21  |
