# Supplementary material for: An over-land aerosol optical depth data set for data assimilation by filtering, correction, and aggregation of MODIS Collection 5 optical depth retrievals
Source: Copernicus journal article supplement (doi:10.5194/amt-4-379-2011), 2011-03-01
Supplement: Supplementary file 37 [file ps015_indian_subcontinent.pdf › aux_material_lite_rev/l3_region_pages/terra/ps015_indian_subcontinent.pdf]

T

24.50N 77.50E Indian Subcontinent

AERONET AOD: N= 1312  $\overline{\tau}$ =0.48 eta=0.52

MODIS  $\tau$

- RAW
- BASE
- NEW
- STRONG

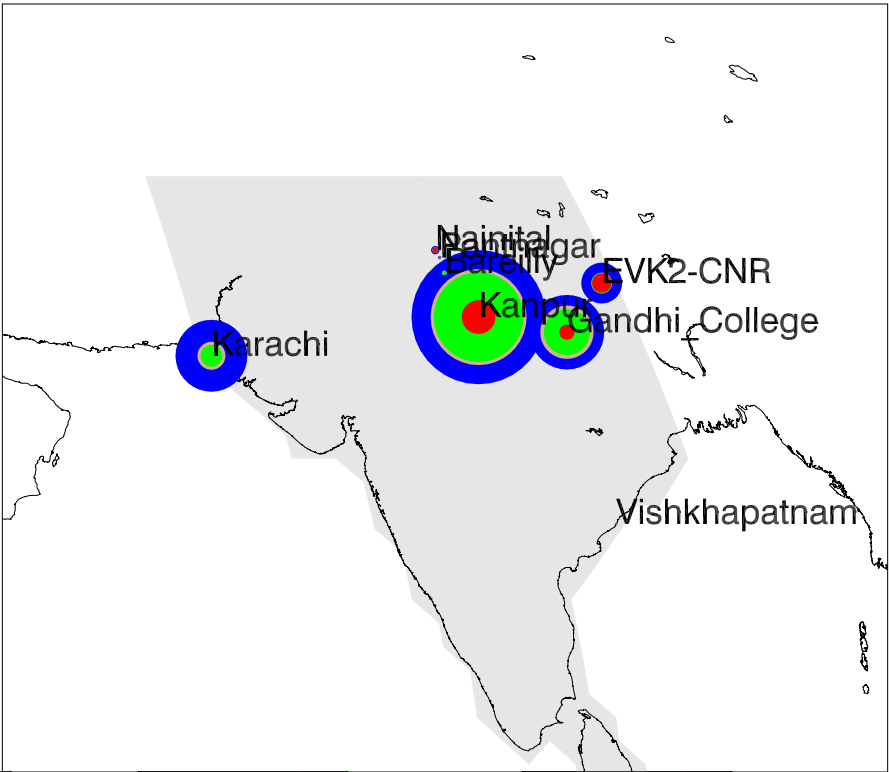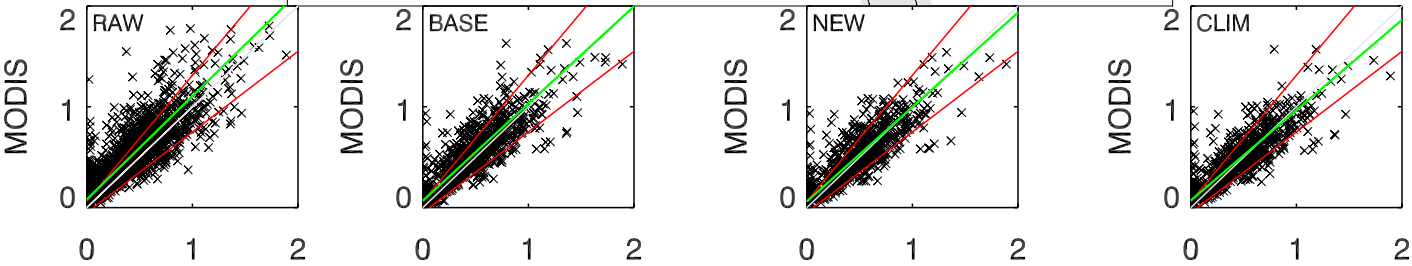

| AERONET           |           |             | AERONET       |             |             | AERONET  |           |       | AERONET    |                |
|-------------------|-----------|-------------|---------------|-------------|-------------|----------|-----------|-------|------------|----------------|
| Which             |           | MODIS AOD   | MODIS-AERONET |             |             | % -/in/+ |           |       | Regression |                |
|                   |           | Mean        | >0.2          | >1.0        | Mean Bias   | RMSE     | Tolerance |       | Slope      | r <sup>2</sup> |
| RAW               | (N= 1311) | 0.574       | 0.91          | 0.08        | 0.093       | 0.219    | 5/57/37   |       | 1.067      | 0.51           |
| BASE              | (N= 810)  | 0.549       | 0.90          | 0.06        | 0.050       | 0.181    | 5/68/25   |       | 1.020      | 0.56           |
| NEW               | (N= 732)  | 0.515       | 0.88          | 0.05        | 0.029       | 0.169    | 7/70/22   |       | 0.988      | 0.57           |
| CLIM              | (N= 724)  | 0.505       | 0.88          | 0.04        | 0.020       | 0.168    | 7/71/20   |       | 0.957      | 0.59           |
| AERONET AOD > 0.2 |           |             |               |             |             |          |           |       |            |                |
| RAW               | (N= 1086) | 0.641       | 0.99          | 0.09        | 0.077       | 0.213    | 6/63/29   |       | 1.061      | 0.49           |
| BASE              | (N= 698)  | 0.604       | 0.98          | 0.07        | 0.038       | 0.174    | 6/72/20   |       | 1.017      | 0.58           |
| NEW               | (N= 625)  | 0.568       | 0.97          | 0.06        | 0.012       | 0.160    | 8/75/16   |       | 0.985      | 0.59           |
| CLIM              | (N= 615)  | 0.557       | 0.97          | 0.05        | -0.001      | 0.157    | 8/77/13   |       | 0.954      | 0.62           |
|                   |           |             |               |             |             |          |           |       |            |                |
|                   | Noise     | vs $\tau_A$ |               | vs $\tau_M$ |             | Est.@    | Est.@     | Est.@ | Est.@      | Est.@          |
| Which             | Floor     | Diagnostic  |               | Prognostic  |             | 0.1      | 0.2       | 0.4   | 0.6        | 1.0            |
| RAW               | 0.247     | 0.09 +      | 0.11 $\tau$   | 0.03 +      | 0.22 $\tau$ | 0.25     | 0.25      | 0.25  | 0.25       | 0.25           |
| BASE              | 0.219     | 0.06 +      | 0.12 $\tau$   | 0.04 +      | 0.17 $\tau$ | 0.22     | 0.22      | 0.22  | 0.22       | 0.22           |
| NEW               | 0.215     | 0.05 +      | 0.12 $\tau$   | 0.04 +      | 0.15 $\tau$ | 0.21     | 0.21      | 0.21  | 0.21       | 0.21           |
| CLIM              | 0.223     | 0.03 +      | 0.14 $\tau$   | 0.05 +      | 0.13 $\tau$ | 0.22     | 0.22      | 0.22  | 0.22       | 0.22           |
