# Supplementary material for: An over-land aerosol optical depth data set for data assimilation by filtering, correction, and aggregation of MODIS Collection 5 optical depth retrievals
Source: Copernicus journal article supplement (doi:10.5194/amt-4-379-2011), 2011-03-01
Supplement: Supplementary file 38 [file ps016_insular_southeast_asia.pdf › aux_material_lite_rev/l3_region_pages/terra/ps016_insular_southeast_asia.pdf]

T

2.50S 121.50E Insular Southeast Asia

AERONET AOD: N= 99  $\overline{\tau}$ =0.34 eta=0.61

MODIS  $\tau$

- RAW
- BASE
- NEW
- STRONG

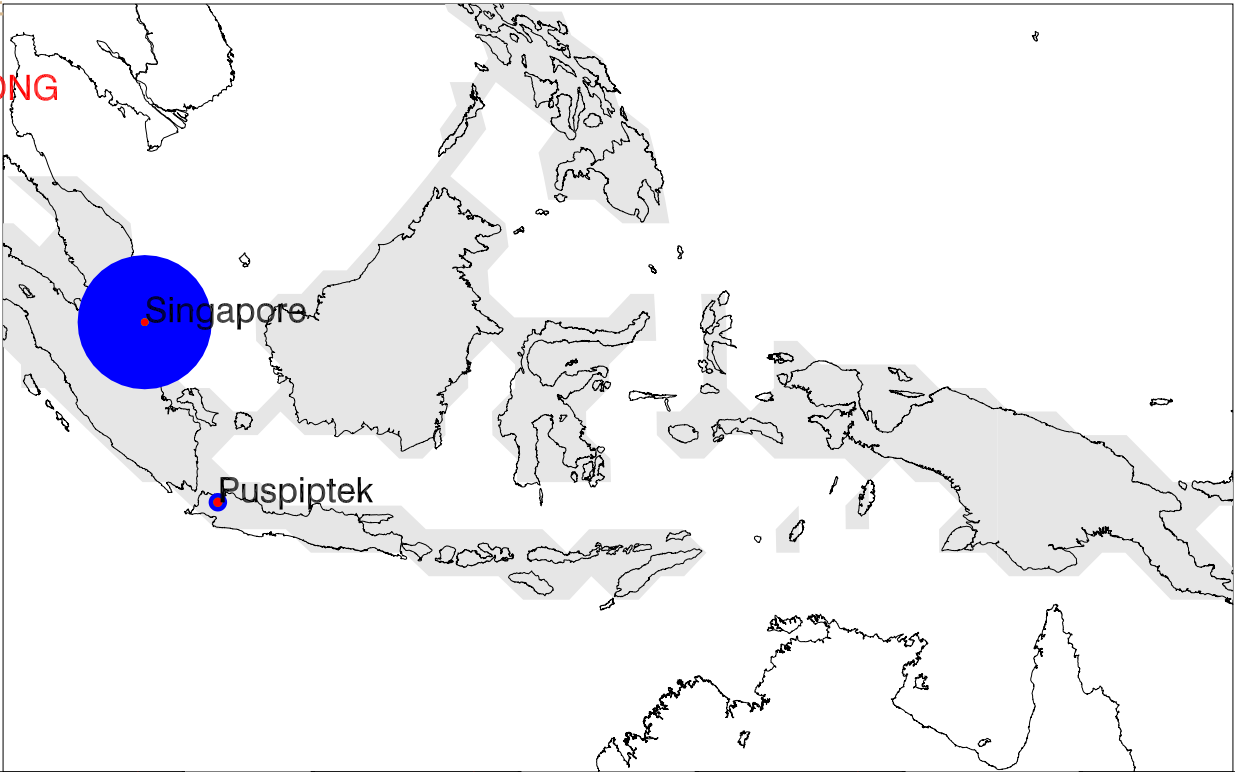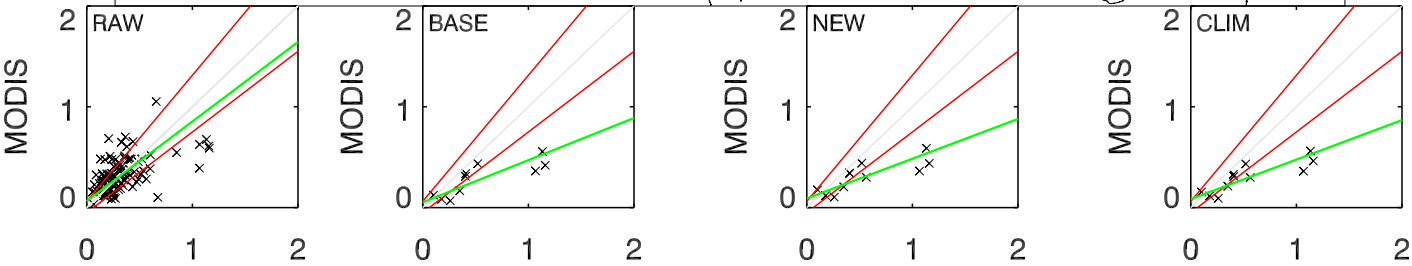

| AERONET           |         |             | AERONET       |              |             | AERONET  |              |       | AERONET    |                |       |
|-------------------|---------|-------------|---------------|--------------|-------------|----------|--------------|-------|------------|----------------|-------|
| Which             |         | MODIS AOD   | MODIS-AERONET |              |             | % -/in/+ |              |       | Regression |                |       |
|                   |         | Mean        | >0.2          | >1.0         | Mean Bias   | RMSE     | Tolerance    |       | Slope      | r <sup>2</sup> |       |
| RAW               | (N= 99) | 0.335       | 0.78          | 0.01         | -0.007      | 0.202    | 24/47/28     |       | 0.829      | 0.23           |       |
| BASE              | (N= 10) | 0.286       | 0.60          | 0.00         | -0.272      | 0.385    | 60/40/ 0     |       | 0.456      | 0.36           |       |
| NEW               | (N= 11) | 0.311       | 0.73          | 0.00         | -0.248      | 0.364    | 54/36/ 9     |       | 0.480      | 0.47           |       |
| CLIM              | (N= 11) | 0.303       | 0.73          | 0.00         | -0.256      | 0.364    | 54/45/ 0     |       | 0.476      | 0.57           |       |
| AERONET AOD > 0.2 |         |             |               |              |             |          |              |       |            |                |       |
| RAW               | (N= 76) | 0.367       | 0.84          | 0.01         | -0.037      | 0.216    | 31/48/19     |       | 0.805      | 0.19           |       |
| BASE              | (N= 8)  | 0.332       | 0.75          | 0.00         | -0.331      | 0.429    | 62/37/ 0     |       | 0.456      | 0.36           |       |
| NEW               | (N= 9)  | 0.347       | 0.89          | 0.00         | -0.305      | 0.401    | 66/33/ 0     |       | 0.480      | 0.47           |       |
| CLIM              | (N= 9)  | 0.340       | 0.89          | 0.00         | -0.312      | 0.402    | 66/33/ 0     |       | 0.476      | 0.57           |       |
|                   | Noise   | vs $\tau_A$ |               |              | vs $\tau_M$ |          | Est.@        | Est.@ | Est.@      | Est.@          | Est.@ |
| Which             | Floor   | Diagnostic  |               |              | Prognostic  |          | 0.1          | 0.2   | 0.4        | 0.6            | 1.0   |
| RAW               | 0.144   | *****       | +             | ***** $\tau$ | *****       | +        | ***** $\tau$ | 0.14  | 0.14       | 0.14           | 0.14  |
| BASE              | 0.069   | *****       | +             | ***** $\tau$ | *****       | +        | ***** $\tau$ | 0.07  | 0.07       | 0.07           | 0.07  |
| NEW               | 0.067   | *****       | +             | ***** $\tau$ | *****       | +        | ***** $\tau$ | 0.07  | 0.07       | 0.07           | 0.07  |
| CLIM              | 0.058   | *****       | +             | ***** $\tau$ | *****       | +        | ***** $\tau$ | 0.06  | 0.06       | 0.06           | 0.06  |
