# Supplementary material for: An over-land aerosol optical depth data set for data assimilation by filtering, correction, and aggregation of MODIS Collection 5 optical depth retrievals
Source: Copernicus journal article supplement (doi:10.5194/amt-4-379-2011), 2011-03-01
Supplement: Supplementary file 39 [file ps017_australian_continent.pdf › aux_material_lite_rev/l3_region_pages/terra/ps017_australian_continent.pdf]

T

26.50S 137.50E Australian Conti

AERONET AOD: N= 3094  $\bar{\tau}$ =0.09 eta=0.50

MODIS  $\tau$

- RAW
- BASE
- NEW
- STRONG

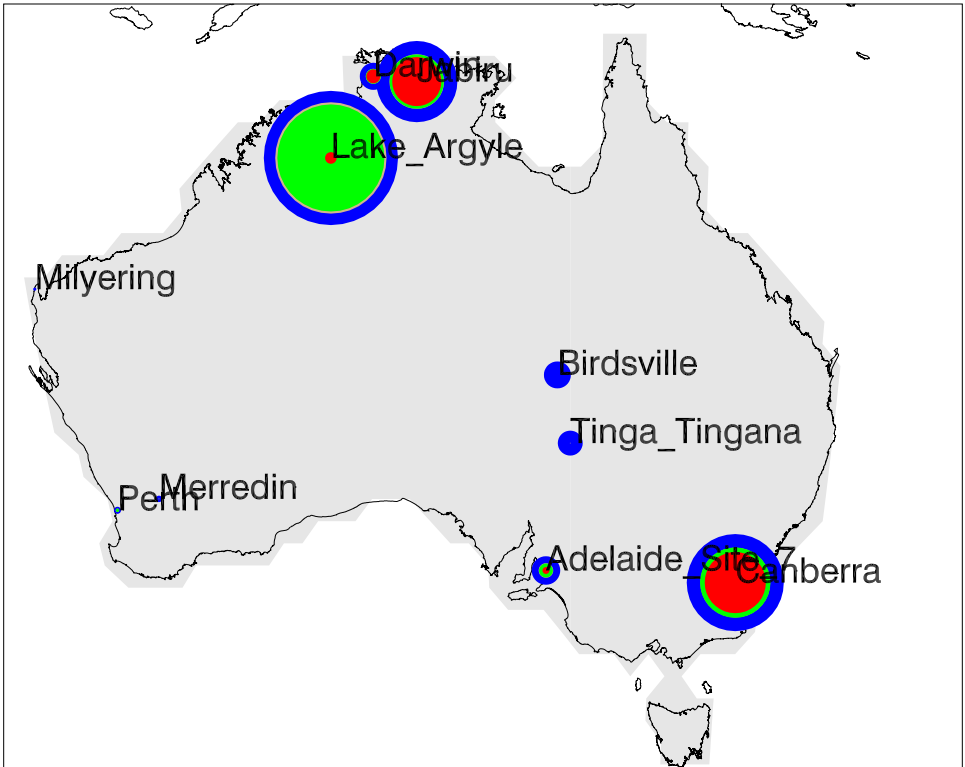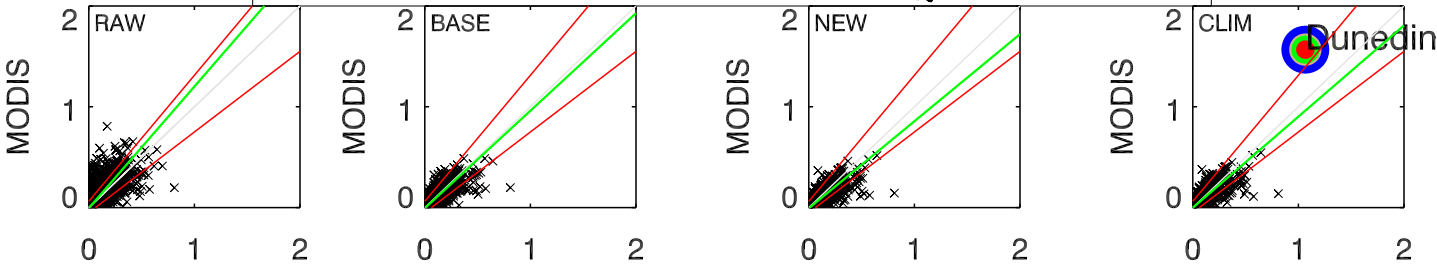

| AERONET           |           | AERONET   |               |      | AERONET   |          |           | AERONET    |                |
|-------------------|-----------|-----------|---------------|------|-----------|----------|-----------|------------|----------------|
| Which             |           | MODIS AOD | MODIS-AERONET |      |           | % -/in/+ |           | Regression |                |
|                   |           | Mean      | >0.2          | >1.0 | Mean Bias | RMSE     | Tolerance | Slope      | r <sup>2</sup> |
| RAW               | (N= 3091) | 0.099     | 0.15          | 0.00 | 0.012     | 0.081    | 10/72/17  | 1.154      | 0.09           |
| BASE              | (N= 1932) | 0.077     | 0.08          | 0.00 | -0.010    | 0.057    | 7/86/ 5   | 0.993      | 0.29           |
| NEW               | (N= 1867) | 0.067     | 0.06          | 0.00 | -0.019    | 0.055    | 7/90/ 2   | 0.890      | 0.22           |
| CLIM              | (N= 1849) | 0.075     | 0.07          | 0.00 | -0.010    | 0.052    | 4/91/ 3   | 0.932      | 0.24           |
| AERONET AOD > 0.2 |           |           |               |      |           |          |           |            |                |
| RAW               | (N= 304)  | 0.267     | 0.69          | 0.00 | -0.026    | 0.127    | 24/63/12  | 0.998      | 0.10           |
| BASE              | (N= 169)  | 0.231     | 0.58          | 0.00 | -0.063    | 0.126    | 32/62/ 5  | 0.905      | 0.21           |
| NEW               | (N= 163)  | 0.209     | 0.48          | 0.00 | -0.087    | 0.139    | 36/63/ 0  | 0.841      | 0.21           |
| CLIM              | (N= 154)  | 0.227     | 0.56          | 0.00 | -0.070    | 0.131    | 33/65/ 1  | 0.868      | 0.19           |

| Which | Noise | vs $\tau_A$ |               | vs $\tau_M$ |               | Est.@ | Est.@ | Est.@ | Est.@ | Est.@ |
|-------|-------|-------------|---------------|-------------|---------------|-------|-------|-------|-------|-------|
|       | Floor | Diagnostic  |               | Prognostic  |               | 0.1   | 0.2   | 0.4   | 0.6   | 1.0   |
| RAW   | 0.074 | -0.03       | + 0.42 $\tau$ | -0.03       | + 0.54 $\tau$ | 0.07  | 0.07  | 0.18  | 0.29  | 0.50  |
| BASE  | 0.045 | -0.05       | + 0.51 $\tau$ | 0.03        | + 0.17 $\tau$ | 0.05  | 0.06  | 0.10  | 0.13  | 0.20  |
| NEW   | 0.039 | -0.10       | + 0.68 $\tau$ | 0.05        | + 0.11 $\tau$ | 0.06  | 0.07  | 0.09  | 0.12  | 0.16  |
| CLIM  | 0.037 | -0.08       | + 0.58 $\tau$ | 0.05        | + 0.11 $\tau$ | 0.06  | 0.07  | 0.09  | 0.11  | 0.16  |
